# Supplementary material for: Are multifractal processes suited to forecasting electricity price volatility? Evidence from Australian intraday data
Source: publisher site journal article supplement (doi:10.1515/snde-2019-0009), 2020-11-17
Supplement: Supplementary file 1 [file elec_bernd_sea.xls]

## Sheet: returns
NSW	QLD	SA	TAS	VIC
-0.975408	-0.135463	-0.687053	-0.0139574	-0.41521
0.993401	2.35397	0.217313	0.0342466	0.219107
-0.949744	-2.25267	-0.118651	0.0531195	-0.130441
-0.0247676	-0.0561067	0.144001	1.27794	0.0237056
0.0254053	0.0132647	-0.0697646	-1.32644	0.0473427
-0.0633565	-0.112951	0.0609149	-0.0270099	-0.0579723
0.0261958	0.0237144	0.938857	-0.0341201	0.0343911
0.195639	0.145415	-0.0466597	0.117239	0.266558
0.511857	0.294614	-0.388477	-0.0707612	0.447275
-0.0352404	-0.177408	-0.405303	0.00264087	-0.406951
-0.231298	0.115331	0.112626	-0.0768182	0.1208
-0.237346	-0.217879	-0.162681	0.0152893	-0.199528
0.0581762	-0.0456669	-0.0365965	-0.0333079	-0.0133648
-0.286853	-0.154719	-0.260439	0.647988	-0.297495
0.131842	0.0999149	1.72593	-0.481939	0.202528
0.0332049	0.0465524	-1.07114	-0.115863	0.0480472
-0.123078	-0.0986969	-0.302203	-0.0160061	-0.100064
0.248323	0.187635	2.58574	-0.025362	2.57828
0.0721696	-0.00886338	-0.0321368	0.0250286	0.173938
0.72041	0.386883	-0.211684	-0.0512975	-1.51668
-0.226595	0.0845026	-0.809839	0.83317	0.333433
1.06887	1.08644	0.323541	-0.802833	0.570101
-1.55192	-0.0373873	-1.65848	0.00693742	-1.80577
0.0199795	-1.32597	0.465833	0.035321	0.3771
0.0115711	-0.148544	2.06448	-0.021085	2.2796
0.527467	0.549774	-2.03798	0.00856107	-2.08359
-0.688367	-0.69503	-0.624326	-0.0752897	-0.778264
0.088691	0.0495895	-0.0204041	-0.00365582	0.142419
0.161772	0.172313	0.0665644	0.0486696	0.0423895
-0.221737	-0.155454	-0.0299381	0.0234356	-0.0936419
0.748408	0.748262	0.481193	-0.0217947	0.603396
3.35175	3.081	0.0100772	-0.0159547	0.0238423
-4.03126	-3.71426	-0.487361	0.0311566	-0.586229
-0.265507	-0.215614	-0.35739	-0.0619024	-0.369079
0.0376357	0.0408892	0.107079	-0.00175064	0.0279925
0.617276	0.543571	0.297204	0.0238736	0.400148
-0.638845	-0.566047	-0.335428	0.871567	-0.369178
-0.0135125	-0.0411953	0.134661	-0.874755	0.0372261
0.0879537	0.0548065	-0.097147	-0.00676396	0.00435201
-0.0693418	0.00186386	-0.0132474	-0.00829614	-0.070508
-0.0527091	-0.0806214	-0.13311	-0.0186471	-0.0997972
0.0604008	0.0228923	-0.00145623	-0.0120859	0.0455006
0.0869152	0.195792	0.241999	0.0750165	0.161382
0.00151603	-0.0787663	0.0468807	0.0471273	0.0493457
0.129992	0.0804167	0.187889	-0.023649	0.181175
0.145805	0.153403	0.449314	0.0317106	0.268824
0.430345	0.386058	-0.0591944	-0.0768522	0.291596
-0.386488	-0.335299	-0.434508	-0.00956153	-0.532392
-0.112377	0.884667	-0.356698	-0.0107379	-0.357667
-0.0284294	-0.793361	0.219041	0.0586335	0.208491
0.122354	-0.0742629	0.151862	0.066656	0.186984
-0.0818517	-0.120807	0.00190537	-0.0102579	-0.0296164
0.0549454	0.0299605	1.95111	-0.0898555	2.68066
0.275938	0.232069	-1.10951	-0.0138255	0.655214
-0.586058	-0.524197	-1.18193	0.00374317	-3.68398
-0.0797909	-0.0495445	-0.21305	-0.035145	-0.201883
0.122344	0.08851	0.365764	0.0302195	0.268092
0.187295	0.175213	0.121649	0.0017279	0.188359
-0.1162	-0.18258	-0.0560746	0.0248957	-0.095132
0.256898	0.21712	0.417325	-0.166531	0.338295
0.199333	0.207717	0.27084	0.425418	0.387752
-0.299296	-0.275298	-0.456788	-0.511408	-0.487575
-0.0907057	-0.0227936	-0.182674	-0.129186	-0.178664
0.282885	0.328297	0.117456	0.142572	0.183866
-0.221864	-0.223054	-0.125659	-0.16477	-0.161355
0.132685	0.505638	0.143551	0.150618	0.148322
0.229697	-0.110301	0.200665	0.297431	0.200334
-0.15684	-0.185307	-0.0964302	-0.0121996	-0.137422
-0.226985	-0.295252	-0.171114	-0.215896	-0.219349
0.0937792	0.0163121	-0.00365813	0.0918499	0.0845835
0.137255	0.139652	-0.0580379	-0.10689	-0.0335618
-0.215443	-0.159693	0.0366576	0.035566	0.0095484
0.0370317	0.0426536	0.0210925	0.033629	0.0321301
0.0597122	-0.101308	0.0015341	-0.000279208	0.00252503
-0.0760694	0.0372132	0.0508464	-0.0289859	-0.0137877
-0.226705	-0.213915	-0.281669	-0.171686	-0.280982
0.00548947	-0.00313352	0.0947157	-0.0196063	-0.0784087
0.151162	0.120028	0.184833	0.137131	0.309835
0.0667764	0.0639285	0.00485907	0.0473375	0.0825416
0.0800378	-0.080384	0.869726	0.102367	0.252067
0.00581754	0.0360446	-0.736879	0.00482588	-0.1658
-0.206668	-0.0949449	-0.0593833	0.23973	-0.209424
-0.156574	-0.159173	0.641842	-0.0995637	-0.18124
0.00713078	0.0324048	-0.824613	-0.403893	-0.00725358
0.0849387	0.170965	0.0832154	-0.065866	0.108828
0.0248363	-0.0305314	0.0156969	1.10743	0.00737905
0.159417	-0.0498601	0.120736	-0.861074	0.195195
-0.00333281	0.139499	-0.0762251	-0.0461079	-0.0298295
-0.0319048	0.0657055	0.0083284	-0.0357107	-0.0064658
-0.13477	-0.103311	-0.0104873	0.00817423	-0.125082
-0.0881439	-0.0709397	-0.116396	0.247163	-0.1408
0.259987	0.3054	0.710575	0.140502	0.312607
0.0318009	1.76522	-0.528408	-0.0704659	-0.0256588
-0.085291	-1.5525	-0.113376	0.138873	-0.0601086
-0.0260142	-0.397746	0.00327896	-0.117713	0.0432946
-0.00650222	-0.0463053	0.0162294	-0.0974785	-0.0279211
-0.068667	-0.114669	-0.035793	-0.001876	-0.0630787
-0.0695144	0.0370241	-0.0760857	1.14464	-0.101923
0.0234674	0.0767292	0.849772	-1.10504	0.966227
0.0865463	-0.0688388	-0.883657	0.0299484	-0.918309
0.096657	0.259166	0.174088	0.0133601	0.0955054
-0.0278833	-0.0887873	-0.0419704	-0.0818918	0.024682
-0.228653	-0.191392	-0.10434	-0.0369527	-0.244474
-0.048861	-0.00250142	-0.00961396	-0.000353668	-0.0701579
-0.00979319	0.0356084	-0.125615	-0.00690341	-0.0166883
-0.00922485	-0.00963871	0.00546459	0.0874291	-0.0344887
0.0838885	0.133061	0.0336401	-0.0930948	0.0863088
0.0663558	0.0723201	-0.000955534	0.0444616	0.0706074
0.228153	0.272493	0.203417	0.00344398	0.243545
-0.0173227	-0.0359889	0.0311984	0.0153992	0.0205779
0.13639	0.0562334	0.112141	0.0106597	0.114416
-0.289962	-0.311944	-0.275923	-0.0698744	-0.324905
0.00892819	0.00931624	0.0608429	-0.12	0.079813
-0.128241	-0.148529	-0.193879	0.0265861	-0.23535
0.250035	0.271711	0.272722	0.0414449	0.327341
-0.0461156	-0.0563646	-0.0735953	-0.0729603	-0.0643227
0.0114255	0.0242326	0.0125977	-0.0178076	0.0157835
-0.124468	-0.11236	-0.149317	-0.269802	-0.1534
0.0137272	0.0189387	0.0470046	0.00713442	0.0331133
-0.0535364	-0.0676629	0.0605129	0.125669	0.00581239
-0.0364579	-0.0159125	-0.11637	-0.0550419	-0.071519
0.0270946	0.0168385	0.0404528	0.0195086	0.0578967
0.0106813	0.0585512	0.0144216	-0.046677	0.00141814
0.0362889	-0.0636637	0.0783744	0.024443	0.0736594
-0.0831635	-0.0418765	0.0288486	-0.0426657	-0.105697
0.104757	0.144335	0.247726	0.101158	0.110554
0.282002	0.270241	1.17729	0.406943	0.399579
-0.0764197	-0.075114	-1.29631	-0.146849	-0.183708
-0.13298	-0.105643	0.0621717	-0.0658466	-0.152381
-0.0626373	-0.0518327	0.0145455	0.00720324	-0.0685122
-0.153347	-0.185154	-0.188287	-0.275573	-0.156655
-0.0320368	-0.0488885	-0.160097	-0.182852	-0.0924516
-0.0138596	0.0500117	-0.0211892	0.233239	-0.0598873
0.060881	0.0238649	0.149142	0.206963	0.142002
0.0110337	0.00802381	-0.0207869	-0.0236852	-0.0123955
-0.0260508	-0.0518809	0.0314131	-0.00441337	-0.0594867
0.0338282	0.0434869	-0.0318504	0.604353	0.0932303
-0.0127274	-0.000388688	-0.069965	-0.835481	-0.0424427
0.0784376	0.0958253	-0.0272293	-0.0389379	0.0951404
-0.0404954	0.00504775	-0.0370441	-0.00237151	-0.0314572
0.350636	0.275698	0.361749	0.492499	0.387151
0.25916	0.296338	1.16518	1.82073	1.20198
-0.445411	-0.437749	-0.530909	-2.12881	-1.45048
0.021582	0.0194692	-0.730139	-0.0133441	0.0180861
-0.0188976	-0.0456591	-0.0643443	0.00769524	-0.0185073
0.0427312	0.0385765	0.00675058	0.0260001	0.0427365
0.0567108	0.090467	0.0573956	-0.0101039	0.0040748
1.07989	1.12568	0.832003	0.973417	0.969673
-0.415878	-0.473923	-0.430827	-0.41458	-0.420781
-0.414042	-0.381834	-0.182594	-0.0347282	-0.230756
-0.284843	-0.298209	-0.250995	-0.29917	-0.221704
0.106749	0.0697049	0.0627323	0.120745	0.0761317
-0.144881	-0.120855	-0.183501	-0.17434	-0.196804
0.0155461	0.0333128	0.0209794	-0.0411518	-0.00741864
0.347126	0.230953	0.321321	0.884951	0.352167
-0.196582	-0.18087	-0.101277	-0.743611	-0.15333
-0.0509504	0.0139452	0.124324	-0.0266399	-0.00293667
-0.0313543	-0.0334868	-0.159314	0.0441935	0.0153246
-0.0346564	-0.0711324	-0.0330658	0.702629	-0.0370466
-0.0347763	0.0130382	-0.0379869	-0.671717	0.0118172
0.105473	0.0649376	-0.0713173	-0.0712112	-0.0588796
-0.0308552	-0.0608911	0.023992	0.0179081	-0.00838691
0.0907141	0.0612089	0.2293	0.142081	0.173176
0.245084	-0.0824532	0.183663	0.136097	0.207222
-0.0173378	-0.059233	0.0255256	0.00228097	-0.0309658
-0.0530658	-0.128505	-0.0844108	-0.0423336	-0.0582464
-0.0790459	0.0197406	-0.208927	-0.145412	-0.158377
-0.124962	0.11418	-0.0991561	-0.0407401	-0.114598
0.192038	0.165944	0.420591	0.447223	0.395342
-0.0662545	0.0512147	-0.0206825	0.756879	-0.102894
0.0206153	0.0654836	-0.118768	-1.02209	-0.0685607
-0.105646	-0.0635859	-0.207189	-0.0911636	-0.106165
-0.0596607	-0.119738	-0.0323802	-0.0750173	-0.0383264
-0.0942463	-0.0980674	-0.0991122	-0.0779002	-0.0876752
0.0535912	0.0789669	-0.0677534	-0.076607	-0.082456
0.179063	0.113606	0.293027	0.372289	0.279594
0.00715427	-0.110602	0.117417	0.0469728	0.0822432
-0.068624	-0.111287	-0.206524	-0.0757204	-0.12828
0.127584	0.368307	0.102913	-0.0353554	0.0989441
0.0910058	0.0830293	0.0332137	0.65122	0.0494308
0.0520403	-0.124645	0.0350549	-0.609546	-0.0538439
-0.235993	-0.183451	-0.129896	-0.125671	-0.239417
0.55446	0.185041	0.581566	0.901672	0.63381
-0.572013	-0.259097	-0.488378	-0.869681	-0.501604
-0.141556	-0.179465	-0.200681	-0.124518	-0.173121
0.0812383	0.0728593	0.144085	0.0836496	0.0816201
0.203035	-0.0670008	0.156971	0.160154	0.194796
0.0527888	0.0275382	-0.110983	-0.142261	-0.20169
-0.100605	0.169477	-0.153988	-0.0641916	0.0190819
0.229729	0.0615237	0.245275	0.23016	0.304553
0.00212322	-0.0480238	0.0977017	0.064198	0.0734996
-0.155619	-0.0843101	0.0436878	-0.091806	-0.108836
0.147128	0.180293	0.00835366	0.0939878	0.122273
-0.0554998	-0.03789	-0.0719792	0.0268397	-0.0277194
-0.151054	-0.229978	-0.264792	-0.291759	-0.282169
-0.381559	-0.020281	-0.367083	-0.158279	-0.397187
0.140117	0.140186	0.228285	0.0784536	0.255468
0.125584	0.0533554	0.131693	0.181923	0.119759
1.96447	0.389715	1.48815	1.61165	1.75107
0.0270072	1.50138	-0.23293	0.00434907	-0.0139917
-1.86536	-2.05018	-1.17243	-1.4589	-1.58727
-0.0818212	0.140984	-0.108979	-0.072747	-0.127145
0.00319009	0.0362209	0.0676705	-0.0422537	-0.0108837
0.583435	0.625849	0.321664	0.403772	0.5126
-0.607725	-0.678801	-0.282345	-0.377962	-0.426647
-0.0255963	0.00603251	-0.0363824	-0.0848697	-0.0691916
-0.066692	0.0268123	-0.0806488	0.0705164	-0.0612549
-0.100242	-0.174925	-0.122453	-0.0807155	-0.106452
-0.087381	-0.158637	0.00265131	0.0267355	-0.136052
-0.0523664	0.0722926	0.374348	-0.0409721	-0.0903729
0.508996	0.257586	0.120934	0.254426	0.585954
-0.15785	0.0485372	-0.0617089	-0.100522	-0.0724386
0.215614	0.209999	-0.0526229	0.0416081	0.0333815
-0.170583	-0.166975	-0.0751553	-0.134379	-0.112544
0.136514	0.03556	0.108436	0.0716356	0.0844971
-0.199414	-0.195569	-0.127416	-0.086192	-0.208999
-0.0361819	0.0409483	0.130744	0.0830956	-0.0390255
0.316552	0.393261	0.0414786	0.156232	0.395372
-0.230014	-0.208355	-0.27532	-0.158773	-0.237366
-0.0591331	-0.0794827	-0.0819734	0.0061307	-0.0706336
0.047861	0.0565064	0.183595	0.0299226	0.0619168
-0.170524	-0.151976	-0.265426	-0.16688	-0.196523
-0.0395851	-0.053343	-0.0653035	-0.127641	-0.0758665
-0.141116	-0.122172	-0.211604	-0.0211529	-0.187134
0.123885	0.119741	0.222572	0.136061	0.210255
0.0713746	0.100353	0.0366044	0.0182854	0.0394706
-0.0641804	-0.0983905	-0.0277045	-0.0614825	-0.0359779
-0.0100564	0.0213048	0.0115046	0.0321413	0.00448044
0.0477514	0.0419577	0.965037	0.720219	0.0976852
-0.025267	-0.070943	-0.927242	-0.709861	-0.0820977
-0.0949789	-0.078198	-0.240096	-0.0835602	-0.152341
0.236684	0.191205	0.313711	0.125353	0.307957
0.0924496	0.0294313	0.125545	0.000861813	0.127299
0.00670558	0.0473469	0.0748157	0.0694746	0.0325494
0.211562	0.0657161	0.181963	0.129186	0.186479
-0.12562	-0.441044	-0.0655338	-0.0680788	-0.102284
-0.192947	0.0371688	-0.201478	-0.0985563	-0.235628
-0.188426	0.0459562	-0.210491	-0.0403051	-0.189266
0.297091	0.279553	0.326704	0.126732	0.330105
0.035396	0.0813093	-0.0121763	0.021976	0.0333781
-0.105227	-0.235934	-0.0894514	0.0104422	-0.0854356
0.0802364	0.292099	-0.00951001	0.0043744	0.0401069
-0.174472	-0.357171	-0.203258	-0.0675097	-0.223209
-0.28436	-0.0887383	-0.275651	0.00749718	-0.333857
-0.0538725	-0.0309742	-0.0742859	-0.21282	-0.0821551
0.283301	0.228569	0.407943	0.0764307	0.404048
0.0198903	-0.0414692	0.0266856	0.12774	0.0447926
0.208279	-0.000214347	0.317484	0.188852	0.213062
0.165163	0.175907	-0.019818	0.0711847	0.103143
-0.243697	-0.117931	-0.194434	-0.138318	-0.180983
0.325592	-0.179786	0.251594	0.208849	0.228308
-0.217983	0.09302	-0.178393	-0.138302	-0.199073
0.687472	0.131757	0.556436	0.439622	0.666857
-0.413405	-0.296015	-0.433602	-0.328928	-0.378701
-0.119892	-0.0444919	-0.049169	0.0457867	-0.113207
-0.214631	0.0150371	-0.057673	-0.13793	-0.145052
0.1286	0.0509012	0.04799	0.170838	0.0919984
-0.180763	-0.00678035	-0.125818	-0.0277927	-0.207019
-0.268815	-0.0472287	-0.304466	-0.00914343	-0.291533
0.181245	0.0865734	0.248986	0.0409633	0.305547
0.0255349	-0.0498347	-0.0765392	-0.107512	0.0195858
0.14979	0.119405	0.132434	-0.0507734	0.0932542
-0.153312	0.143058	-0.0795081	-0.0465291	-0.115461
-0.112287	-0.232577	-0.0707508	-0.11582	-0.0959737
-0.118504	-0.0661356	-0.144676	-0.0889755	-0.168212
0.125057	0.0352295	0.123953	0.0395513	0.13611
0.319849	0.335415	0.320395	0.16886	0.414676
-0.232353	-0.156255	-0.213797	-0.273362	-0.240103
0.0648496	0.155794	0.0544164	0.0249498	0.0556831
0.0597843	-0.149982	0.0474526	-0.00222553	-0.0287478
-0.217695	-0.0165048	-0.178573	-0.244901	-0.20649
-0.145032	-0.111648	-0.169303	-0.327369	-0.214113
-0.105244	-0.0638631	-0.152819	-0.119787	-0.166943
0.0954093	0.0743674	0.100575	0.255718	0.183899
0.172862	0.118979	0.22988	0.207717	0.206237
-0.0515083	-0.0536025	0.0246361	-0.00152731	-0.0107113
0.0434218	0.0425604	0.0164657	0.118913	0.0299098
0.0189807	-0.00480928	0.0400507	0.0577671	0.0662384
-0.187914	-0.173756	-0.14498	-0.0976064	-0.285745
-0.097427	-0.0547679	-0.301245	-0.200012	-0.17371
0.262934	0.20039	0.392223	0.148414	0.383923
0.168794	0.156525	0.0884928	0.128175	0.145046
-0.0109165	-0.168095	-0.0964234	0.0927432	-0.0832502
0.400815	0.524555	0.609125	0.326062	0.494198
0.0461822	-0.221425	-0.22854	0.0191773	-0.00887109
-0.192688	-0.26036	-0.135355	-0.0807559	-0.156068
-0.350838	0.0517694	-0.178531	-0.151782	-0.306855
0.315946	0.305188	0.325683	0.144148	0.29247
-0.0538093	-0.0990997	-0.0675919	-0.0251	-0.0249621
-0.0875234	-0.136138	-0.192916	-0.162954	-0.141865
-0.077754	-0.102405	-0.0107568	0.0593336	-0.0490583
0.023635	-0.124625	-0.0288869	0.0721533	-0.00410327
-0.257113	-0.0654602	-0.137527	0.0620892	-0.203019
-0.0430018	0.00230037	-0.0509983	0.10282	-0.0889753
0.255259	0.0779857	0.235859	-0.104813	0.301329
0.0623537	0.029919	0.0468855	0.0449397	0.0651143
-0.123141	-0.0629549	-0.144996	-0.00658979	-0.133368
0.103941	0.0767854	0.105238	-0.0695906	0.0770865
0.129975	0.181757	0.0654652	-0.0208793	0.100759
-0.0677831	-0.214413	0.0244799	-0.0338924	-0.0643397
-0.259462	0.022604	-0.229134	-0.109718	-0.276865
0.0170031	-0.034032	0.0395136	0.101173	0.0871395
0.11154	0.0843071	0.0776606	-0.00229607	0.0841942
-0.0639543	-0.0558519	0.0644255	-0.030909	0.0600049
0.140056	0.170584	-0.00354458	-0.0421107	0.0561455
-0.0355975	-0.0259305	-0.0484257	-0.00115634	-0.0541624
0.0299976	-0.162832	-0.0397836	-0.0119455	-0.0341994
-0.136134	-0.00993025	-0.125391	0.00226986	-0.156845
0.0745683	0.119877	0.111488	0.00489709	0.114011
0.0953312	0.106827	0.0415505	0.023416	0.0125509
0.32048	0.198281	0.205105	0.11507	0.304108
-0.348503	-0.318126	-0.22239	-0.0640552	-0.270875
-0.0219241	-0.0764242	0.052235	0.00175711	0.0245626
-0.019543	-0.117233	0.965518	0.060086	-0.0519119
-0.168917	0.0296311	-0.975232	-0.0812168	-0.182414
0.181026	0.0760279	0.061895	-0.00362545	0.185652
-0.0184141	-0.074458	-0.0650339	-0.00275895	-0.0185055
-0.0517324	0.165721	-0.10083	0.00841802	-0.0111792
-0.0940704	-0.171529	-0.0406402	0.00660405	-0.0530244
-0.0946464	-0.0580031	-0.113404	-0.0293027	-0.142378
-0.0408475	-0.0250515	-0.0283656	-0.240458	-0.0828332
0.051893	0.0211809	0.072588	0.0436237	0.0817283
0.876453	0.576918	0.847924	0.57264	0.895545
0.662949	0.613079	-0.195908	-0.0775982	0.554509
-0.258975	0.0670875	-0.0200131	0.0388304	-0.48042
-0.764373	-0.610235	-0.278715	-0.272043	-0.495643
-0.10583	-0.180008	-0.0117492	0.023765	-0.0567932
0.221722	0.154305	0.187599	0.0484139	0.171961
-0.446063	-0.409259	-0.434794	-0.214167	-0.44901
0.249032	0.150722	0.408622	0.187333	0.315328
0.352126	0.413933	0.638075	0.151462	0.21434
-0.469911	-0.0916986	-0.964582	-0.214144	-0.481157
-0.263263	-0.603698	0.221866	0.164269	-0.165636
0.437749	0.376162	-0.141754	0.0317717	0.316035
-0.433295	-0.435068	-0.285829	-0.332571	-0.378483
-0.242599	-0.192163	-0.274994	-0.199895	-0.276781
0.11878	0.0659222	0.241437	0.211323	0.244677
0.276834	0.23309	0.663698	0.174759	0.546244
-0.0562995	-0.0269112	-0.514073	-0.233264	-0.310587
0.0540105	-0.0145673	0.0818902	0.131998	0.0487474
0.0749018	0.141031	2.40957	0.0734913	0.09853
-0.0113626	-0.240216	-1.68993	0.00742106	0.105136
-0.119306	0.0844354	-0.682142	0.026941	-0.183155
0.0569104	0.093863	-0.204408	0.0642261	-0.146988
-0.343908	-0.278237	-0.185878	-0.284779	-0.247532
0.0876842	0.0786141	0.16005	0.0201423	0.0880233
0.391976	0.364331	0.186733	0.316004	0.297771
-0.400634	0.663162	-0.332809	-0.372175	-0.373712
-0.115364	-1.19199	-0.103459	-0.171611	-0.155741
-0.110869	-0.11568	-0.0702764	0.0138847	-0.127351
0.228731	0.206339	0.523459	0.305209	0.57518
0.174569	0.156168	-0.102329	0.00490381	-0.115027
-0.013616	-0.016678	0.520968	0.00839591	0.00146818
0.442328	0.17287	-0.074267	0.125338	0.482983
-0.483382	-0.256493	-0.550166	-0.277422	-0.510722
-0.220441	-0.203058	-0.290108	-0.279695	-0.328605
-0.0724451	-0.0714049	-0.204492	-0.0459358	-0.167899
-0.156809	-0.150326	-0.288628	-0.0180789	-0.273596
0.00104502	-0.0100598	0.150006	-0.0053965	0.0738384
0.0862724	0.0999762	0.214257	0.00162025	0.175257
0.0467332	0.0145503	0.0250532	0.00438149	0.00575613
0.0385684	0.028629	0.456864	-0.00868976	0.0428305
9.17132e-05	0.00285021	0.947353	-0.00150561	0.018643
-0.0397727	-0.0368258	-1.1534	-0.00442016	-0.00388594
0.0151205	-0.0013372	-0.00929703	-0.0190743	0.0679659
0.284823	0.203333	0.426886	0.472054	0.578804
0.000577734	-0.00177681	0.136124	0.219939	0.15643
0.17887	0.165969	0.179468	0.0685912	0.170465
0.252103	0.20159	0.09325	0.0224256	0.11412
-0.0118248	-0.075488	-0.337213	-0.0191994	-0.247159
-0.50524	-0.282944	-0.56263	-0.395989	-0.624176
0.343368	0.406496	0.432132	0.136773	0.408407
-0.0801861	-0.213823	-0.00827169	0.0786999	-0.0533126
0.210576	0.249655	0.586583	0.0711603	0.65813
2.144	2.04544	0.0283843	0.361833	0.938496
0.045268	0.215621	-0.402032	-0.551799	-0.639989
-2.25455	-2.27583	-0.213924	0.163013	-0.825722
0.112596	0.169122	0.10044	-0.00434154	0.106122
0.0888375	0.0528432	0.436975	0.685837	0.398545
0.644128	0.61221	2.72424	-0.387994	3.37536
-0.0471184	-0.0960069	-2.50082	0.00116115	-3.09286
0.0323543	0.0376952	-0.0059566	-0.0359037	-0.0253552
-0.203734	-0.228878	-0.173651	-0.116259	-0.17952
-0.249002	-0.350778	-0.422517	-0.0161819	-0.295797
0.100254	0.196842	-0.13049	0.0483763	0.0247129
0.274546	0.352707	0.59729	0.128872	0.375248
0.928892	1.71987	-0.245579	-0.170828	0.400863
-1.23607	0.057301	-0.0840766	-0.0951	-0.780834
-0.23236	-2.30506	-0.0124246	-0.0292308	-0.135365
-0.368304	-0.454501	-0.551844	-0.0222422	-0.465021
-0.196115	-0.0815083	-0.240981	-0.157723	-0.24232
0.0258895	0.00490228	0.0872049	-0.237868	0.055997
0.538501	1.40577	0.646217	0.41831	0.591836
0.626417	-0.205539	-0.0253215	-0.166021	0.257394
-0.552911	0.413044	-0.0431887	0.00140201	-0.250477
-0.286357	-1.3403	-0.0888021	0.172034	-0.172727
0.320077	0.243215	0.41223	0.0544902	0.423842
0.26151	0.313282	-0.00277332	-0.525736	-0.212496
-0.352371	-0.395674	0.0950449	-0.520731	-0.253096
0.863312	0.812627	0.435426	1.08595	1.12828
-0.93676	-0.891575	-0.896721	-0.102116	-1.00074
0.0684895	0.0795127	0.0888114	0.0331735	0.080257
0.00127715	0.000563896	-0.0517982	-0.0277507	-0.018692
0.0642608	0.0510158	0.081878	-0.00508468	0.0889669
-0.473992	-0.520301	-0.52188	0.480488	-0.49884
0.0523082	-0.0410011	0.0425359	-0.637471	0.0315675
0.272195	0.388082	0.466458	0.0292407	0.397708
0.056598	-0.127745	0.0747521	-0.00733163	0.0316771
0.308551	0.331089	0.205298	0.175077	0.264031
0.292949	0.203854	0.301186	0.0397622	0.269072
0.344804	0.273468	0.305487	0.066488	0.357937
-0.46507	-0.833115	-0.210894	0.333099	-0.305903
-0.519201	-0.216912	-0.578831	-0.715258	-0.460293
0.755326	1.053	0.817904	0.266201	0.626299
0.189931	0.0902893	0.108142	-0.0176048	0.153961
-0.375965	-0.260961	-0.527024	-0.0347049	-0.382978
-0.0143422	0.0866621	0.0885782	1.41477	0.0279309
-0.112751	-0.102984	-0.184892	-1.45047	-0.147668
-0.321311	-0.302368	-0.49953	-0.0759823	-0.45581
-0.445103	-0.376255	-0.318135	-0.1166	-0.392509
0.284523	0.241579	0.409566	0.146605	0.452351
0.0982519	0.100955	0.10619	0.0191496	0.0954572
0.13395	0.0992488	0.16282	0.0825373	0.154232
0.109508	0.140302	0.0455885	0.0417524	0.0647967
0.516404	0.531322	0.436874	0.164166	0.412185
0.613462	-0.124469	-0.784902	-0.2471	0.0919147
-0.906509	-0.373935	-0.106746	0.00196971	-0.742735
-0.251007	-0.0811139	0.233244	0.0926944	0.0423457
-0.171658	-0.170103	-0.143002	0.00828939	-0.121586
-0.0989614	-0.0913772	0.013681	-0.0887121	-0.0551516
0.108604	0.122096	0.0142108	0.0159259	0.0270128
-0.158738	-0.11395	-0.109993	0.0617851	-0.144922
-0.119928	-0.136351	-0.158239	-0.0958859	-0.163896
0.191899	0.229239	-0.00240774	-0.0845789	0.100226
0.0116432	1.61861	-0.00840062	0.0973905	0.00611437
0.00388438	-1.63236	0.195592	0.0802819	0.142854
0.126558	0.0677353	0.260728	0.0148117	0.199582
0.182942	0.181605	1.61347	-0.00854522	1.71883
0.041701	0.0390794	-1.46828	0.0283614	-1.53736
0.0521154	0.111057	-0.328271	-0.000418537	-0.18
-0.402275	-0.402971	-0.173344	0.0923762	-0.306183
0.318404	0.3199	0.429579	-0.0977267	0.398558
0.262208	0.180541	0.0880948	0.0546144	0.14635
0.291357	0.139901	0.135409	0.0197621	0.199599
0.434229	-0.202	0.403436	0.131648	0.495603
0.0337428	0.763571	-0.193137	-0.101786	0.190961
-0.899113	-0.784683	-0.81103	0.0105278	-1.25826
-0.592214	-0.558363	-0.168575	-0.299955	-0.32512
0.286801	0.235529	0.444814	0.163038	0.451809
0.0628369	0.0731824	-0.00119477	-0.0270164	0.0139206
0.0216952	0.0057205	0.0174907	-0.01114	0.0375791
-0.00143081	0.0383131	-0.0790241	0.00600387	-0.0480594
-0.00515884	0.0415248	0.0042679	0.0160662	-0.005505
-0.0129539	-0.00535482	0.0401941	0.0865624	-0.0521189
0.259181	0.217215	0.32581	0.0212296	0.25662
0.377406	0.416976	0.244923	0.170392	0.307403
0.0847654	0.0749227	0.0114808	0.138273	0.0791249
0.112354	0.125705	0.0193979	-0.0126754	0.0482936
-0.115002	-0.124375	-0.0994749	-0.120771	-0.0769629
-0.437686	-0.45881	-0.316426	-0.0515038	-0.362862
-0.0899892	-0.0807179	-0.0669015	-0.0287442	-0.0759808
-0.277896	-0.277226	-0.256515	-0.241193	-0.283865
0.344343	0.326447	0.312007	0.187336	0.31211
0.161602	0.175319	0.277305	0.167318	0.216718
-0.0786882	-0.0359858	-0.118156	-0.0984868	-0.145447
0.0694165	0.0809909	-0.00167017	0.0418352	0.00255077
0.200502	0.234483	0.167957	0.0695079	0.213155
-0.148655	-0.177698	-0.121092	-0.0571608	-0.087074
-0.151336	-0.13802	-0.0965634	-0.0297999	-0.112825
0.514401	0.506192	0.23343	0.133868	0.26745
-0.0867945	-0.0597227	0.0672742	0.0600834	0.0748403
-0.0610303	-0.0739492	-0.0412425	-0.0625435	-0.0750952
0.752225	0.740242	0.187724	0.137499	0.184153
-0.173556	-0.184629	0.0809093	0.0323154	0.047987
-0.896299	-0.861285	-0.423859	-0.309796	-0.412048
-0.0580208	-0.0673539	-0.175788	-0.0878596	-0.0781463
0.319473	0.382709	0.316177	0.232629	0.246014
0.195474	0.18334	0.185691	0.185437	0.253659
-0.444358	-0.485169	-0.334789	-0.299201	-0.407313
0.38254	0.414944	0.310136	0.513665	0.359901
0.004951	-0.0428676	0.0272027	0.0285543	0.0215209
-0.209989	-0.239663	-0.14368	-0.372471	-0.187654
-0.418976	-0.39974	-0.430235	-0.27598	-0.446295
0.404483	0.431446	0.372738	0.231	0.404007
-0.170745	-0.170538	-0.166891	-0.0638733	-0.158675
0.0630264	0.058104	0.0625752	0.0161426	0.0622004
0.0915311	0.0998941	0.0467339	0.0582102	0.0744434
-0.0773362	-0.0603932	-0.135147	-0.107133	-0.0936174
-0.417818	-0.392669	-0.324399	-0.116684	-0.396216
-0.203045	-0.226239	-0.229414	-0.144749	-0.223584
0.350709	0.306983	0.367115	0.242522	0.399487
0.188313	0.235222	-0.0645204	0.051444	0.156262
0.00472091	0.00410219	0.253588	-0.0237231	0.00874386
0.139639	0.127891	0.123531	0.117995	0.180437
0.144603	0.170095	-0.0200618	0.078922	0.110164
0.0834205	0.0701887	-0.384197	0.193566	0.0894427
-0.476746	-0.45301	-0.447228	-0.396693	-0.462267
-0.0487741	-0.0252181	0.512527	-0.00612633	-0.0117108
-0.0610144	-0.0709996	-0.0439456	-0.0560363	-0.0667332
-0.0129754	-0.0198755	0.00155637	-0.0315839	-0.0622255
0.0996722	0.0888168	0.0866317	0.00608887	0.14184
-0.0450212	-0.0580382	0.0483655	-0.0086875	-0.0519804
-0.288952	-0.329036	-0.351489	-0.12473	-0.281075
-0.0509235	-0.0491309	-0.0491665	-0.0631936	-0.0451363
0.363957	0.385376	0.421077	0.223812	0.383844
0.0283456	-0.0495033	-0.0467699	0.00841414	0.0317486
0.0182576	0.0652103	-0.116185	-0.0402959	-0.0154192
0.0478692	0.0656299	-0.110319	-0.035317	-0.00457629
-0.0981137	-0.0702596	0.142419	-0.0906833	-0.118922
0.0085369	0.0348035	-0.0504171	-0.0437728	-0.0115231
-0.120821	-0.0631617	-0.0468205	0.0359243	-0.106379
0.264088	0.279037	0.327597	0.280563	0.2776
0.00704309	0.0235625	-0.00776949	-0.128291	-0.00171709
0.266214	0.235302	0.169054	0.0556511	0.216853
0.0663901	0.00914787	-0.187833	-0.136189	0.0461241
-0.344536	-0.314262	-0.291612	-0.112155	-0.239369
-0.164914	-0.135847	-0.174552	-0.120226	-0.222221
-0.081584	-0.116184	0.161884	-0.0177607	-0.0638494
0.177355	0.19451	0.178808	0.101201	0.169295
-0.00984029	-0.042662	0.0235884	0.00458688	0.00174042
-0.050732	-0.0290508	-0.0925616	-0.109252	-0.0756204
0.254254	0.229179	-0.0632626	-0.087952	0.0348886
0.228529	0.191419	0.145201	0.335188	0.218037
-0.121465	-0.107807	-0.267277	-0.125893	-0.140108
-0.368922	-0.36002	0.0509789	0.0237517	-0.177123
0.280841	0.204727	-0.016259	-0.0437864	0.154461
1.12484	1.12861	0.492713	0.165557	0.867094
1.24313	0.347578	-0.0719707	-0.637659	0.808031
-0.505557	0.376857	0.204524	0.530989	-0.471822
-0.460007	-1.01513	0.192941	0.127096	-0.429462
-0.0872958	0.441657	-0.0196171	0.191982	0.167932
-1.23386	-1.11881	-0.413146	-0.0420489	-0.829079
0.880626	0.8601	0.903957	1.07403	1.01014
0.768483	0.812465	-0.0822142	-0.366637	0.289932
-0.201078	-0.215038	-0.00390364	-0.0687708	-0.214827
-0.963351	-1.02927	-0.334414	-0.131697	-0.529463
0.161866	0.180448	0.282819	0.142005	0.224761
-0.0962267	-0.28757	-0.107183	0.0430009	-0.101186
-0.176172	-0.457885	-0.173532	-0.107967	-0.177805
0.0592846	0.237335	0.163601	0.15269	0.167536
0.972183	1.21062	0.266445	0.234021	0.567035
0.763428	0.714997	-0.0732825	0.149522	0.459869
-0.141919	-0.0308373	0.0442235	-0.121668	-0.123234
-1.55619	-1.54536	-0.380242	-0.170978	-0.943661
-0.737888	-0.953275	-0.669086	-0.366313	-0.698677
0.0202072	0.12996	0.200746	-0.0337119	0.0940555
0.0354119	0.0894293	0.304169	0.0645529	0.214309
-0.0682598	-0.172307	-0.151212	-0.09498	-0.157557
-0.00298378	-0.0401693	0.103036	-0.0408147	0.0673136
0.0313866	0.0714209	-0.138162	0.00533849	-0.00929623
-0.150305	-0.138951	-0.0948244	-0.0366138	-0.0858619
0.0230687	0.034393	-0.117887	-0.0154017	-0.117712
0.41312	0.424498	0.264386	0.13897	0.266933
0.795282	0.806072	0.493256	0.365839	0.547051
-0.699543	-0.717551	-0.411105	-0.301578	-0.400244
-0.435734	-0.412681	-0.242067	-0.155277	-0.250379
0.0229048	0.00773309	0.0680379	0.0422662	0.0860567
0.38251	0.42428	0.233469	0.16963	0.246363
-0.421934	-0.426299	-0.468593	-0.247532	-0.484996
0.175312	0.174884	0.0872947	0.106396	0.0978326
0.31146	0.311701	0.251881	0.110107	0.306968
0.393459	0.254122	0.313795	0.274119	0.363229
-0.157737	-0.119013	0.147182	-0.0298906	0.00706186
-0.216032	-0.0309998	-0.178609	-0.117828	-0.208515
-0.306995	-0.317075	-0.399484	-0.273599	-0.388319
-0.393316	-0.424472	-0.353493	-0.034897	-0.369021
0.0924446	0.106219	0.12095	-0.0770735	0.0935929
0.338165	0.345826	0.353962	0.274894	0.401575
-0.0681797	-0.100468	-0.196072	-0.103868	-0.13771
-0.29506	-0.307387	-0.357816	-0.252137	-0.308515
-0.0357923	-0.0432702	0.0255879	0.00909896	-0.000405464
-0.084905	-0.081372	-0.020363	0.0410374	-0.0667817
-0.213677	-0.247658	-0.139396	-0.195095	-0.217252
0.0913784	0.0761819	-0.0128826	0.072926	0.0418405
0.542339	0.524296	0.664152	0.336083	0.631156
-0.108999	-0.0977719	-0.170313	-0.0769399	-0.116646
-0.317494	-0.282226	-0.376436	-0.274294	-0.395315
-0.0279896	0.0139158	0.00503383	0.0723783	-0.0188506
0.0434371	0.0240034	-0.0263453	-0.26453	0.0240022
0.078355	0.0845861	-0.0138446	-0.0130724	0.0355231
-0.180525	-0.141066	-0.143617	-0.297656	-0.22389
0.272366	0.257337	0.330162	0.364976	0.346614
-0.178605	-0.232276	-0.264154	-0.455142	-0.210144
-0.119664	-0.152016	0.016083	0.147108	-0.049335
-0.0436332	-0.053922	-0.183542	-0.249061	-0.128558
-0.182687	-0.163058	-0.136679	0.0758745	-0.185537
-0.178678	-0.146161	-0.175171	-0.531776	-0.235868
-0.0600614	-0.0591498	0.0359739	0.125084	-0.0340413
0.360177	0.325753	0.466288	0.158306	0.488094
0.132062	0.0726081	0.0377106	0.311165	0.0789205
-0.0331588	-0.0526396	-0.0353352	0.140903	-0.0271811
0.0948858	0.149609	0.0979418	0.0587465	0.120997
-0.073625	-0.0444629	-0.0544151	-0.14857	-0.0771594
-0.170522	-0.189659	-0.0500001	-0.403773	-0.199812
0.10671	0.100175	0.016495	0.270547	0.0101658
0.322136	0.404772	0.204718	0.363926	0.373439
-0.110457	-0.0927846	-0.0889098	0.0282995	-0.0964908
-0.117887	-0.179816	-0.0726816	0.00771135	-0.0850411
-0.00750017	-0.0231015	-0.0109004	-0.0193158	-0.0132528
-0.0464132	-0.00185004	-0.0824876	-0.377874	-0.0709351
-0.270526	-0.310444	-0.239747	-0.0206257	-0.268073
-0.00256174	-0.0148733	0.0251392	-0.0437786	0.0198653
0.145301	0.0939268	0.178924	0.214026	0.20303
0.0443353	0.0258591	0.0567563	-0.0316485	0.018482
0.00492817	0.153151	-0.00409837	-0.0362325	0.00194428
-0.0109945	-0.0342917	-0.116786	-0.171379	-0.0710205
0.0981973	0.0989154	0.0782625	0.210753	0.0750605
-0.130277	-0.0925881	-0.110051	0.0236317	-0.119899
-0.0516895	-0.086544	-0.0390437	0.000389567	-0.0648518
0.409037	0.413705	0.52297	0.343637	0.47867
0.232323	0.236	-0.0181136	-0.22287	-0.150862
0.267552	0.232708	0.0300168	0.251006	0.231661
-0.410281	-0.367715	-0.129423	-0.0189057	-0.0482951
0.142552	0.617354	0.170091	0.0762684	0.159611
-0.340219	-0.855227	-0.277977	-0.247453	-0.320516
-0.0095881	-0.015947	-0.186363	-0.0521761	-0.11075
0.0636604	0.0763639	0.122344	0.0529503	0.0859053
0.055025	0.0200875	0.0863848	0.0193605	0.0755643
-0.0523986	-0.000926214	-0.00189332	0.0491907	-0.0339763
0.145799	0.229828	-0.00684439	0.00713358	0.0672697
-0.00915743	-0.00902371	0.0905876	0.0755331	0.0385874
-0.218816	-0.270641	-0.18718	-0.0588849	-0.216654
-0.0648474	0.0126564	-0.0384611	-0.074672	-0.0414001
0.306686	0.376259	0.340716	0.150243	0.312337
-0.143322	-0.298428	-0.258956	-0.00765333	-0.136979
-0.0185438	-0.0710239	0.00799813	0.00848295	-0.0456843
0.268749	0.272362	0.316244	0.0422086	0.27874
-0.0994679	-0.131605	-0.146702	0.0734065	-0.0861933
0.142918	0.162011	-0.0820774	-0.0094103	-0.00746424
-0.399843	-0.379956	-0.213518	-0.177336	-0.302058
0.373515	0.873723	0.32562	0.118258	0.304946
-0.0586714	-0.50504	-0.0490334	-0.0272831	-0.0277898
-0.245651	-0.194369	-0.17955	0.0703645	-0.203799
0.137921	0.175614	0.0903506	0.0373951	0.164502
-0.00904619	0.0471822	0.049043	-0.00405683	0.0282459
-0.189676	-0.328861	-0.200814	-0.150359	-0.214026
-0.186227	-0.142169	-0.129101	-0.918711	-0.181551
0.053582	0.0209834	0.0141951	0.524739	0.0801055
0.15098	0.127431	0.224707	0.0778238	0.140979
0.0843133	0.113352	-0.102211	-0.168106	0.0106289
-0.115289	0.00739818	0.0430175	0.0671405	-0.0710345
-0.0297262	0.42653	-0.0501073	-0.0258615	-0.0440773
-0.283853	-0.215111	-0.307842	-0.344337	-0.346838
-0.0314861	-0.0903195	0.0773631	-0.0021598	0.0310032
0.293616	1.84557	0.20592	0.467962	0.340377
0.093586	-1.35387	-0.030912	0.0648693	0.0925149
-0.17386	0.280532	-0.0492372	-0.191179	-0.147246
0.12331	0.143672	0.1872	0.159439	0.123899
-0.0229961	-1.10338	0.0436457	-0.0204016	0.0371094
-0.243223	-0.440977	-0.208904	-0.271902	-0.235475
-0.225899	-0.278559	-0.28242	-0.285573	-0.339828
0.264587	0.305371	0.177667	0.369715	0.249355
0.130331	0.142623	0.053661	0.0756336	0.0844448
-0.0982032	-0.151884	0.0656429	1.82732	0.0275455
-0.217896	-0.213363	-0.232417	-2.25013	-0.273537
-0.0334387	-0.0412004	0.0379159	-0.0595001	-0.0663288
-0.0462017	-0.0536504	0.0844465	0.0585451	0.0437767
0.270217	0.293417	0.274939	0.291709	0.295177
1.97467	0.500293	0.785299	0.905249	0.952794
-1.56577	0.11553	-0.634577	-0.59217	-0.61162
-0.14015	0.828832	-0.0829414	-0.1297	-0.102596
0.187498	-0.826129	0.209023	0.30227	0.209515
-0.106073	0.376789	-0.0227403	-0.147306	-0.0356019
-0.193508	-0.651271	-0.285869	-0.231616	-0.269567
-0.298904	-0.223944	-0.261679	-0.419945	-0.31101
0.241409	1.18689	0.0616532	0.261215	0.150106
0.0866855	-0.465431	0.17519	0.256444	0.0974989
0.0268927	0.0118095	0.0238064	-0.101376	0.0441399
-0.0325462	-0.370259	-0.0174121	0.130296	0.00233453
-0.0391731	0.0181107	0.086233	0.0226822	0.030885
-0.374652	-0.521615	-0.334042	-0.247682	-0.414798
-0.0166394	3.07233	0.0632374	0.109832	0.0706805
0.180556	-2.9512	0.0496616	-0.0231478	0.0638539
-0.0251409	-0.14433	-0.0469268	0.0703724	-0.0208511
0.118899	0.00529872	0.197556	0.0979959	0.250598
-0.01944	0.026232	-0.148723	-0.03801	-0.120252
-0.0185751	-0.0732958	0.0594442	0.0258155	0.0252162
-0.189865	-0.161763	-0.187711	-0.124771	-0.211432
-0.132757	-0.111832	-0.144496	-0.00365279	-0.165953
0.444814	0.440734	0.437317	0.0367976	0.458073
0.0163134	-0.0375851	0.063796	0.113887	0.0179359
0.104707	0.108195	0.0864787	0.100371	0.128966
0.184129	0.217793	0.131043	0.127066	0.200449
0.084814	0.0300998	0.926725	0.25669	0.873866
-0.6967	-0.672303	-0.506239	-0.296218	-0.100072
0.109243	0.116804	-0.712458	-0.0975216	-1.08122
0.97506	0.844523	0.796165	0.424712	0.803096
-0.4784	-0.361237	-0.589446	-0.293546	-0.484409
-0.176408	-0.262058	-0.207164	-0.140839	-0.241755
0.0976171	1.18664	0.034215	0.0382835	0.0570949
0.0323473	-0.90545	0.0626176	0.0442954	0.0257916
-0.387285	-0.506005	-0.227431	-0.0993431	-0.276969
-0.101975	-0.093074	-0.121627	0.000478754	-0.146821
0.270606	0.279906	0.200314	0.051809	0.264356
0.0879076	0.0894167	0.18046	0.0197388	0.126518
0.118162	0.115666	0.0716926	0.0420783	0.0760646
-0.0439594	-0.114252	-0.0338634	-0.0213753	-0.0660375
-0.0947812	-0.0736713	-0.0564416	0.0215923	-0.0402206
-0.338929	-0.35885	-0.214618	-0.0921525	-0.250851
0.172109	0.106615	0.0215506	0.1224	0.129723
0.253262	0.425056	0.0960526	-0.0202849	0.22859
0.116193	0.0689641	0.123073	0.0193982	0.0439547
0.0888227	0.0475907	0.0880885	0.0238422	0.0595528
1.31875	0.964138	0.891708	1.23028	1.43551
-1.24224	-0.215431	-0.948276	-1.14498	-1.2382
-0.34426	-1.05855	-0.159453	-0.161735	-0.448262
0.00101074	-0.028955	-0.201564	0.00439156	-0.0831231
0.295344	1.08696	0.451112	0.0702073	0.322783
-0.222843	-0.298688	-0.147159	-0.0834897	-0.18958
-0.23058	-0.719342	-0.234578	-0.113296	-0.202578
0.032074	-0.0782154	0.141837	0.0851973	0.108614
0.0532107	0.0306671	0.0935474	-0.106917	0.10018
-0.184661	-0.245662	-0.311526	-0.0471985	-0.257492
-0.27384	-0.224747	-0.216354	-0.162137	-0.316739
0.523813	0.52764	0.371105	0.265375	0.567534
-0.118458	-0.1992	0.0715874	-0.00254399	-0.0345456
0.0506483	0.0320187	0.180097	0.0553519	0.101318
-0.0765308	-0.050964	-0.106481	0.133733	-0.0917323
0.109307	0.0955756	-0.186272	-0.0116458	-0.0344474
-0.377389	-0.368869	-0.346517	-0.465798	-0.445041
-0.193273	-0.171421	-0.228359	-0.407349	-0.289618
0.00889109	0.0288571	0.00744238	-0.0017216	0.00277208
-0.152986	-0.171526	-0.120609	0.00210088	-0.17151
0.160433	0.133096	0.277509	0.0568112	0.204315
0.183062	0.142727	0.226062	0.303699	0.246439
0.429585	0.0659844	0.412521	0.520128	0.481715
0.285439	0.478863	0.3329	0.0843014	0.318012
-0.747212	-0.586839	-0.294541	-0.4108	-0.732624
0.19959	0.136217	1.58596	-0.0827133	1.0759
-0.168585	-0.159073	-1.07623	-0.243785	-0.788775
0.134751	0.150239	-0.970442	0.246031	-0.263919
0.146898	0.156668	0.204083	0.00194464	0.233933
0.334526	0.387882	3.43944	-0.214808	1.08312
-0.0141222	0.00690982	-2.96647	-0.375536	-0.660499
-0.232267	-0.21298	-0.46427	-0.0219891	-0.414491
0.0823019	1.14195	0.108713	0.344297	0.0762903
-0.22461	-1.18426	-0.184725	0.161428	-0.198211
0.14346	4.23882e-05	0.195138	0.37673	0.18045
0.34856	0.229561	3.59486	0.299626	1.06138
-0.222903	-0.255838	-3.53347	-0.167994	-0.760031
-0.458716	-0.371163	-0.451198	-0.453162	-0.676091
0.228947	0.230869	0.109775	0.20858	0.181296
-0.0454253	0.0014495	0.124918	0.224095	0.0952572
0.185715	0.127908	0.118338	-0.0663691	0.113581
0.00137038	0.0193063	-0.0431498	0.0373775	-0.00324728
-0.214031	-0.231458	-0.14854	-0.135173	-0.185491
-0.0502552	-0.0404981	0.0807587	-0.0499374	-0.0175157
-0.328769	-0.333066	-0.425746	-0.415105	-0.416613
-0.0307082	-0.026187	-0.175086	-0.143235	-0.11225
0.333394	0.654713	0.40838	0.707256	0.433423
-0.0400514	-0.392578	0.00462888	0.0206484	-0.0146706
0.0113666	-0.0116696	0.0625631	0.0521339	0.0243147
0.0178217	0.0469148	0.0180768	-0.0872607	0.0187044
0.0773092	0.078318	0.169787	0.0786119	0.162325
-0.114033	-0.142287	-0.055326	-0.177348	-0.088037
-0.109156	-0.0724474	-0.306962	-0.310545	-0.297484
0.166707	0.181639	0.151946	0.10142	0.145068
0.470915	0.472293	0.389097	0.392283	0.467111
0.137171	2.36058	0.0755247	0.0595337	0.0716282
-0.197786	-2.04448	-0.182736	-0.0900696	-0.168977
-0.308955	-0.68645	-0.147119	-0.047191	-0.213654
-0.0916587	-0.12518	-0.131199	0.0221723	-0.132773
-0.129969	-0.131365	-0.184022	-0.185522	-0.169835
0.218202	1.01123	1.0071	-0.106947	0.991738
0.109688	-0.508131	-0.695917	0.239596	-0.60105
-0.0700273	-0.229084	-0.0410273	0.0659995	-0.062964
-0.133316	1.97195	-0.131807	0.0538517	-0.171289
0.0216953	-1.53146	0.0370673	-0.0601517	0.0255798
-0.100943	-0.646714	-0.157253	-0.0534827	-0.149856
-0.12687	-0.119057	-0.119738	-0.0114188	-0.148427
0.171984	0.139667	0.341057	0.0839579	0.334284
0.0174028	-0.000765908	-0.0543287	-0.0104602	-0.0294272
-0.0255232	0.055122	-0.0746827	-0.229919	-0.0602046
0.000464373	-0.054851	0.0138616	-0.127629	0.0334889
-0.00466026	-0.0327645	1.2321	0.820965	1.22684
-0.153454	-0.173698	-0.784137	-0.385616	-0.908963
-0.013646	0.026742	-0.364042	-0.153236	-0.401789
0.188314	0.182343	4.3974	0.0303932	1.45914
0.0376187	0.0273032	-2.46177	0.160016	-0.734359
0.0535844	0.608733	-1.92876	-0.0782344	-0.594711
0.0104498	0.139107	0.046019	-0.0137874	0.0359287
0.00565705	3.33012	-0.103441	-0.214655	-0.0787152
-0.19153	-0.0927857	-0.262218	0.0982544	-0.345054
-0.130125	-4.14253	0.0302667	-0.0565752	0.0045069
0.148125	0.11261	0.248464	-0.0486653	0.264084
0.0382243	-0.000673354	-0.00977558	0.0619357	0.0221223
-0.0472114	-0.0156473	-0.0541835	0.175544	-0.0491934
0.0865289	-0.00690635	0.087881	-0.0177329	0.0799995
-0.0616953	0.0403145	-0.0563103	-0.0373671	-0.0621972
-0.129705	-0.178199	-0.129206	-0.0732561	-0.165538
-0.0588284	-0.0458893	-0.0314119	-0.0714579	-0.0593616
0.103814	0.0970545	0.416509	0.192428	0.50288
-0.0108262	-0.0356552	-0.110515	-0.0951975	-0.161967
0.511264	0.221695	3.60848	0.0770802	0.27879
0.185033	0.25859	-0.138453	0.0743143	0.151419
-0.136986	0.0647009	-1.15521	-0.0649803	-0.122134
-0.517394	-0.537948	-2.38683	-0.258394	-0.509403
-0.0281957	0.0468229	0.0588879	0.0325463	0.0158894
0.190337	0.213383	0.381785	0.459696	0.51693
0.398012	0.447712	0.468717	-0.172946	0.088257
-0.0863188	-0.141206	2.47677	-0.0657003	-0.0685887
0.442672	0.487983	0.475626	0.133363	0.437567
-0.0297185	-0.102233	-2.88174	0.060427	0.183369
-0.145231	-0.254931	-0.362918	0.0438105	-0.406319
-0.248295	-0.0623394	0.261165	0.0544324	0.251364
1.00804	0.544304	1.83697	-0.135894	1.91514
-0.755234	-0.341078	-2.23506	0.10644	-2.13846
-0.313487	-0.264165	-0.168164	-0.260193	-0.328589
-0.1946	-0.239297	-0.285602	-0.321449	-0.235417
-0.333082	-0.358825	-0.401528	-0.333795	-0.390261
0.00516728	0.00770176	0.104187	0.0828238	0.0303118
-0.0816076	-0.0449771	-0.0661138	-0.0884586	-0.0861735
0.0809195	0.0398961	0.0884959	-0.306399	0.0947757
0.0975513	0.158456	0.124134	0.540007	0.176463
0.117679	0.374645	0.144555	0.184662	0.159586
-0.123691	-0.372885	0.0203558	-0.0377295	0.000331473
0.0300398	0.00504721	-0.0150327	0.0455286	-0.0391072
-0.0236508	-0.082179	-0.051003	0.00438498	-0.0550922
-0.0693855	-0.0689011	-0.156475	-0.152302	-0.123152
0.0791503	0.0503838	0.608527	0.562401	0.634128
0.17034	0.170804	-0.165702	-0.16552	-0.205712
-0.0385987	0.0320508	-0.215962	-0.0847029	-0.121527
0.0662137	0.124184	0.143624	-0.227593	0.0575309
-0.12158	-0.084959	0.00973339	-0.20833	-0.0761126
-0.0970076	-0.115611	-0.207804	-0.070311	-0.293529
-0.0416228	-0.102814	-0.0261729	0.194787	0.0400666
0.1478	0.132094	0.209026	0.382864	0.261809
0.006103	0.0101999	-0.0609492	-0.168627	-0.0660958
-0.0650483	-0.00333943	0.233359	0.112166	0.249073
0.177497	0.170036	0.123041	0.0898683	0.149966
-0.0369022	-0.0217707	-0.310986	-0.221662	-0.348954
-0.131341	-0.120199	-0.188287	-0.20046	-0.209388
0.0684323	0.103313	0.133713	0.0668583	0.140536
0.266816	0.261391	0.240812	0.297598	0.258428
-0.0320808	-0.0618003	-0.018337	0.0634001	0.0075291
0.0862145	0.103544	0.0883375	0.0168852	0.0965882
0.0347903	-0.0216094	0.0680842	0.0165932	0.0465877
-0.146123	-0.132059	-0.0729872	-0.00628925	-0.0982348
-0.166016	-0.215755	-0.172423	-0.12179	-0.177355
-0.0251041	0.0153683	-0.126134	-0.132349	-0.104785
0.22613	0.162233	0.258483	0.149865	0.266649
0.0764619	0.117394	-0.029945	0.000173318	-0.0029491
-0.139575	-0.135702	-0.0534215	-0.210865	-0.115843
-0.125077	-0.101427	-0.101985	-0.256643	-0.112027
-0.133765	-0.176405	-0.201879	0.249942	-0.167363
-0.0423488	-0.0553902	-0.0226392	-0.110873	-0.00983016
0.107102	0.172321	0.138937	0.13469	0.151426
0.462394	0.464129	0.363374	0.173969	0.383113
0.187645	0.185256	0.177083	0.19879	0.190048
0.014791	-0.0434421	-0.0712085	0.180394	0.0700031
-0.225381	-0.265694	0.0651614	-0.0682617	0.0181995
-0.139888	-0.0236019	-0.155076	-0.216043	-0.183275
-0.03354	0.0465271	-0.160063	0.112184	-0.197097
-0.0844069	-0.0985141	-0.153339	-0.257008	-0.180493
0.0632524	0.0145667	0.460538	0.292878	0.499227
0.0644588	0.141159	-0.232092	-0.2022	-0.217763
-0.111924	-0.138696	0.0965226	0.0696698	0.084677
0.338276	0.233309	0.0903518	0.00739001	0.0648833
-0.153774	-0.193675	-0.147288	-0.058419	-0.140101
-0.00744681	0.0781905	-0.067589	0.0689477	-0.0929974
-0.119475	-0.0884253	-0.124673	-0.0535026	-0.133251
0.273163	0.210323	0.233131	0.189034	0.258885
0.276376	0.20676	0.211801	-0.0151489	0.221767
-0.451232	-0.331882	-0.398184	-0.344216	-0.374558
-0.103562	-0.0598295	-0.235763	-0.0391677	-0.0702492
0.0593783	-0.0367776	0.128249	0.131741	0.127941
0.0682788	0.104573	0.202996	0.620948	0.323838
-0.160891	-0.0629863	0.0208991	-0.370741	-0.181218
0.0429821	-0.000416516	0.0511485	0.071656	0.0925344
-0.0199877	-0.0348895	-0.240022	-0.295175	-0.383149
0.0180759	0.081102	-0.0215562	-0.0314109	-0.0232667
0.20012	0.170774	0.0901184	0.0967146	0.155836
-0.0397972	-0.0420748	-0.0608452	-0.0333193	-0.0568701
-0.0846398	-0.020158	-0.118102	0.0243751	-0.0961496
0.0690316	-0.00302619	0.129732	-0.0403085	0.0719073
-0.00257275	0.0172598	0.0165726	0.188289	0.0630698
0.0608944	0.0741495	0.0726374	-0.024578	0.0310548
0.289144	0.258498	0.261931	0.10364	0.231349
-0.151781	-0.106668	-0.236512	-0.0719845	-0.148977
-0.235562	-0.26901	-0.142196	-0.0940213	-0.168518
-0.120108	-0.137511	-0.0339977	-0.0686292	-0.0923216
0.0254924	0.00253254	0.0976957	0.0174559	0.0705396
0.204777	0.211686	0.0280869	0.142061	0.15215
0.0225661	-0.0925248	3.83046e-05	0.0192792	0.00993556
0.081605	0.148468	-0.0371411	0.00260924	0.0110174
0.0217472	0.0260904	-0.0202154	-0.0144445	-0.0359818
0.0403232	0.0344591	0.00812661	0.0565408	0.0872169
-0.206017	-0.209654	-0.0256173	-0.128342	-0.186858
-0.433631	-0.359916	-0.431854	-0.113298	-0.597962
0.000747372	-0.00469572	0.0132293	-0.26726	0.092156
0.23506	0.248455	0.0881216	0.286336	0.219381
-0.113197	-0.10886	-0.0354211	-0.0889515	-0.0645032
0.0600944	0.0928833	0.0580768	-0.0244548	0.0585809
0.16203	0.136087	0.230344	0.148142	0.20353
-0.0507539	-0.0384738	-0.00236648	0.0109482	-0.0441125
-0.137706	-0.153255	-0.154077	-0.127122	-0.161646
0.0532022	0.0506812	0.0942091	0.0422966	0.104496
-0.0127518	-0.0253535	-0.162014	-0.0643766	-0.0737136
-0.196478	-0.209024	-0.00395358	-0.0425605	-0.149423
-0.0368964	-0.0225992	-0.00789094	0.0869666	0.0161245
0.0684573	0.164499	-0.00301765	-0.0450001	0.0117581
-0.00537899	-0.00335656	-0.160036	-0.056891	-0.110036
0.0865938	0.735068	0.109047	-0.0205212	0.0386709
0.368906	0.20413	0.349315	0.346455	0.409976
-0.183306	-0.0788996	-0.136424	-0.256916	-0.141507
-0.18676	-0.779329	-0.172813	-0.263328	-0.17127
0.0833829	0.0520356	0.133161	-0.0213309	0.13906
0.0288117	0.0232855	0.042425	0.0107147	0.0126413
0.0389553	-0.0305936	-0.165437	-0.174926	-0.0821516
-0.3329	-0.454569	-0.265257	-0.504225	-0.312796
0.0701151	0.206411	0.134496	0.0702891	0.141889
-0.203808	-0.208564	-0.082873	-0.32655	-0.13478
-0.0982818	-0.0934868	-0.050981	-0.341314	-0.0972133
0.186836	0.144737	0.263173	0.845569	0.177665
0.222248	0.221815	0.112326	0.323982	0.201051
-0.217618	-0.18638	-0.229316	-0.266999	-0.218887
-0.170388	-0.182369	-0.231752	-0.140922	-0.248296
0.100452	0.0821576	0.309036	0.0999666	0.220113
0.137802	0.10849	0.11444	0.352228	0.203819
0.174784	0.202025	-0.0532838	0.00760338	-0.000933104
0.0504292	0.0878373	-0.00848865	-0.0607711	0.0732222
-0.118625	-0.139969	0.0124525	-0.346928	-0.0896368
-0.111606	-0.160419	-0.195636	0.00307722	-0.168356
-0.271598	-0.244735	-0.235162	-0.675949	-0.267506
0.0600649	0.0666435	0.115876	-0.217489	0.138233
0.000529117	-0.038686	0.189704	0.00236908	0.12557
0.187553	0.0275077	0.11202	0.794966	0.113196
0.0382675	0.11264	-0.0303397	0.124685	0.014801
0.0571899	0.0074066	0.0895301	-0.692434	0.101771
-0.117596	-0.114998	-0.250678	0.118095	-0.209131
-0.0681021	0.0647187	0.0494021	1.03726	-0.00810025
0.172166	0.22338	0.214436	-0.385151	0.242103
0.129167	0.109314	0.129621	0.339704	0.10959
2.03698	2.07459	1.84296	0.603001	1.92577
-1.89758	-1.90288	-1.82364	-0.221273	-1.89474
-0.160971	-0.232897	-0.0682286	-0.156697	-0.0576368
-0.0645615	-0.140281	-0.146473	-0.0368212	-0.14256
0.103465	0.131456	0.0912599	0.104093	0.0436499
0.332514	0.510429	0.298588	0.121853	0.297809
-0.212736	-0.242884	-0.219358	-0.00101231	-0.174599
-0.154191	-0.175679	-0.11019	-0.0981928	-0.146733
-0.105214	-0.0950937	-0.185619	-0.0900339	-0.151821
0.0108501	-0.0418127	0.0245734	-0.0359232	0.0257346
0.0270237	-0.15711	0.0815934	0.0775432	0.0818301
-0.132018	0.0339884	-0.132005	-0.123732	-0.147121
0.166061	0.200534	0.265279	0.110696	0.204957
0.18173	0.165402	0.101001	0.161513	0.144474
0.0625507	0.0370364	0.00436888	-0.00483089	0.0831688
-0.0101944	-0.0293481	0.0383344	0.0284183	0.0172986
0.0596781	0.0895146	0.0675793	0.119746	0.0674828
-0.119656	-0.124129	-0.0991959	-0.0449098	-0.14315
0.249525	0.231098	0.168813	0.0909179	0.20426
0.243591	0.256105	0.383926	0.119717	0.310744
-0.235089	-0.199167	-0.321316	-0.122534	-0.232879
0.039051	0.0360034	0.073924	0.0317347	0.00918815
-0.0718485	-0.0593117	-0.178711	-0.285959	-0.120547
-0.288262	-0.293389	-0.220844	0.120626	-0.266172
-0.062212	0.000933274	-0.128619	-0.0727579	-0.137587
-0.113334	-0.126511	-0.0951563	-0.118495	-0.105685
0.329717	0.27941	0.372755	0.200873	0.347197
-0.118416	-0.143138	-0.12869	-0.00222534	-0.104763
-0.0917178	-0.0888036	-0.0548844	-0.0445649	-0.0306694
0.0450825	0.0571544	0.0158157	-0.0169574	0.0397656
0.302011	0.176009	0.241218	0.153103	0.181836
-0.016654	0.0492127	0.0399569	0.0636767	0.0457178
-0.12477	-0.0656651	-0.107465	-0.158156	-0.128006
0.155998	0.120272	0.0828448	0.0593525	0.104736
-0.292074	-0.224679	-0.203476	-0.180251	-0.201977
0.118355	-0.130066	0.149387	0.0679281	0.130849
-0.121454	-0.0505018	-0.14199	-0.00495819	-0.173911
-0.182738	-0.0477798	-0.190484	-0.105911	-0.170146
-0.123044	-0.113278	-0.209502	-0.0674441	-0.157804
0.0299902	0.0191423	0.0196776	-0.0530406	0.0192837
0.326693	0.2731	0.354094	0.099612	0.379278
0.0818959	0.0144401	0.113411	0.155224	0.131587
0.201487	0.108557	-0.0231325	0.22679	0.147895
-0.0905783	0.0792156	0.0738774	-0.115514	-0.073268
-0.0974132	-0.206548	-0.0569349	-0.063048	-0.0890811
0.00800461	0.012771	-0.093045	-0.16854	-0.0766695
-0.388139	-0.281987	-0.223721	-0.0686184	-0.33096
0.405847	0.161176	0.344897	0.281368	0.41881
0.146708	-0.00142316	0.108455	0.0785453	0.113804
-0.0957921	-0.096228	-0.111443	0.0176808	-0.0846415
-0.0675439	0.178499	-0.226084	-0.132547	-0.0451265
-0.329055	-0.142947	-0.290837	-0.407758	-0.367339
-0.184372	-0.132088	-0.0548645	0.00929804	-0.149301
-0.164904	-0.13642	-0.151505	-0.167187	-0.226397
0.315379	0.236616	0.397026	0.279504	0.416365
0.306059	0.302684	0.449801	0.323425	0.367826
-0.058091	-0.147389	-0.187282	-0.115415	-0.0364001
-0.0843524	0.0258335	-0.123017	-0.323204	-0.126107
-0.0828422	-0.0557554	-0.0725429	-0.304748	-0.0709791
0.0848347	0.805308	-0.045386	0.657413	0.0809643
0.0989127	-0.643925	0.208316	-0.0481959	0.0993464
0.62951	0.579218	0.173076	0.271002	0.594865
-0.105655	-0.172691	0.112776	-0.0259253	-0.0296893
-0.826667	-0.754239	-0.175671	0.0903286	-0.647344
0.0019435	-0.00826837	-0.386217	-2.00747	-0.238582
-0.0155387	0.00969006	0.0659304	0.326073	-0.00189167
-0.130375	-0.0805791	-0.23187	0.107722	-0.225784
-0.0372301	-0.0410915	-0.107735	-0.805302	-0.106194
0.361927	0.382616	0.477674	1.1947	0.461632
-0.0153979	-0.0233406	0.0714493	0.0905454	0.0542772
0.0772757	0.0780542	-0.137656	0.00311567	0.0104632
0.0955864	0.0727441	0.136616	0.236143	0.132372
0.341088	0.317445	-0.00783928	0.241546	0.255312
-0.595552	-0.571777	-0.324736	-0.282294	-0.533657
-0.241131	-0.235136	-0.306472	-0.324285	-0.278758
0.533044	0.596946	0.388114	0.608149	0.629656
0.118892	0.0521837	0.485216	0.131605	0.103177
-0.0339364	-0.0617439	-0.00607827	-0.100045	-0.0592788
-0.204569	-0.165664	-0.119919	-0.222239	-0.132944
0.0455338	0.034871	0.014148	0.150742	0.0057594
-0.361975	-0.3348	-0.390106	-0.342939	-0.417388
-0.122922	-0.122319	-0.368017	-0.271131	-0.260393
0.454477	0.399015	0.615852	0.473751	0.585543
0.132247	0.113437	0.188879	0.278029	0.181376
0.120941	0.0542967	0.107785	0.162063	0.111027
0.0673593	0.073153	0.162306	0.0900297	0.0901632
0.079775	0.0380045	0.0749009	0.0468482	0.0496464
-0.349294	-0.26769	-0.414894	-0.156471	-0.312517
-0.035622	-0.107199	0.0168085	-0.0121045	-0.0421517
0.117697	0.227327	0.188102	0.078246	0.196716
-0.0583957	-0.0515913	-0.162636	0.285759	-0.0736347
0.105242	0.103824	0.134969	-0.136511	0.0819135
0.0934364	0.0455395	0.192586	0.0349552	0.107576
-0.196195	-0.175279	-0.221671	-0.055937	-0.187801
-0.231117	-0.234968	-0.391311	-0.255409	-0.310159
-0.0461434	-0.0418446	-0.0808657	-0.0869525	-0.0418357
0.516204	0.53141	0.325706	0.268067	0.451601
0.0708179	0.0622269	-0.0314608	0.117255	0.096177
-0.18551	-0.205983	0.0418776	0.00168145	-0.148661
0.33254	0.362969	0.227014	0.18568	0.317927
3.1871	1.32882	-0.0242819	-0.152085	-0.0445616
-3.42631	-1.69605	0.057551	-0.00823463	-0.146517
-0.00853662	0.0262379	0.028633	0.0890076	0.0324158
0.0361985	0.0437452	-0.00200227	0.0801082	-0.0209939
-0.288288	-0.157081	-0.324392	-0.302151	-0.322374
0.0368221	-0.14821	0.0163297	0.0215646	0.0784769
0.217382	0.233635	0.160807	0.0566203	0.191083
-0.0920965	0.57597	-0.355876	0.0269708	-0.0289966
-0.250504	-0.782186	-0.0649115	-0.299634	-0.198348
-0.281275	-0.3502	-0.0685997	-0.321253	-0.321077
0.283136	0.33093	0.359115	0.409815	0.316523
0.0448685	0.0730865	0.0449	-0.00283603	0.0307069
0.0519649	0.0255309	0.473461	0.34854	0.465193
0.0123683	-0.0199357	-0.365323	-0.0570459	-0.172762
-0.012535	0.0306481	-0.152173	-0.10233	-0.16793
-0.3583	-0.379459	-0.294865	-0.432618	-0.379285
-0.178659	0.900806	-0.260833	-0.0853782	-0.300405
0.248854	-0.817671	0.342465	0.250316	0.343041
0.022889	-0.00615728	0.0487718	-0.0261897	0.0817766
-0.00629644	0.0666373	-0.0729788	-0.117543	-0.121628
0.0543067	1.93527	0.129316	0.215932	0.135288
0.0180884	-1.60551	-0.177897	-0.118149	-0.0864076
-0.195139	-0.428662	-0.0999453	-0.192772	-0.190689
-0.161548	-0.280122	-0.0558187	-0.0870643	-0.222884
0.337943	0.331646	0.383598	0.293458	0.514731
-0.151133	-0.107442	-0.225049	-0.130047	-0.250026
-0.0393691	-0.0738967	0.0438562	0.014403	0.0154579
0.12277	0.116589	0.0388123	-0.0295676	0.0619536
0.0370127	0.168476	-0.0562953	-0.0294902	-0.076133
-0.253279	-0.287874	-0.380135	-0.396324	-0.353254
-0.133912	-0.210859	-0.194521	-0.100458	-0.398167
0.282949	0.31323	0.502325	0.251892	0.583595
0.0812837	0.451384	-0.0137687	0.0776668	0.112425
0.0647811	-0.199459	0.0929354	0.0555453	0.0926111
-0.193932	-0.0166852	-0.270409	0.0884332	-0.240158
0.432432	0.148279	0.336398	0.161499	0.515298
-0.242302	-0.269681	-0.239101	-0.332269	-0.401647
-0.308837	-0.276075	-0.21477	-0.306642	-0.388386
0.203494	0.114313	0.349503	0.363819	0.428815
0.0554362	0.0666737	-0.0229958	0.0817381	0.0261826
-0.0613977	1.61899	-0.0415352	0.0143452	-0.0568242
0.0740969	-0.845078	0.142185	-0.102592	0.179198
-0.207138	-0.93102	-0.295089	-0.18022	-0.311589
-0.103537	0.0437854	-0.220378	0.0143115	-0.17939
-0.109363	0.367765	0.0981742	-0.224404	-0.129419
0.124764	-0.550597	0.188698	0.318968	0.221989
0.135282	0.108592	0.0684791	-0.0377446	0.138063
0.086344	0.0732533	0.127363	0.145237	0.130805
0.00952232	0.0514005	-0.134458	-0.0472902	-0.0241232
-0.161374	-0.0100275	-0.128567	-0.0403749	-0.156772
-0.171294	-0.318782	-0.200821	-0.420958	-0.306099
-0.0396379	0.276191	0.226797	0.131913	0.0448507
0.0797522	-0.295363	-0.062402	0.110685	0.172842
0.0544903	0.0649857	-0.0372498	-0.121216	-0.0660003
-0.0102823	0.970293	0.075953	-0.0170534	-0.0712725
-0.134587	-0.0626209	-0.219983	-0.0496722	-0.284709
0.120304	-0.998764	0.252692	0.078379	0.160932
0.173373	0.159714	0.0374955	0.139802	0.337516
0.0869623	0.0652938	-0.0635921	0.101624	-0.0278881
-0.0295006	0.121862	-0.082505	-0.0370365	-0.0735103
-0.0464893	0.283375	-0.196664	-0.174218	-0.111977
0.000669931	-0.0034182	-0.000962996	-0.0021282	-0.0015545
-0.0322074	-0.153222	-0.20387	-0.107724	-0.120212
-0.178816	-0.51359	0.176741	0.0936858	0.0155131
-0.00730991	-0.0377548	0.125295	0.00854709	0.0152194
-0.0057206	-0.0545145	0.0598848	0.125266	0.0232869
0.633899	0.564379	0.491016	0.440754	0.626533
0.476424	0.485763	0.36558	0.207943	0.407535
-0.107664	-0.00512278	-0.338818	-0.0755032	-0.262733
-0.696713	-0.603785	-0.355579	-0.40506	-0.381505
-0.0971754	-0.0838405	-0.0393427	-0.0712988	-0.0878977
-0.0882427	-0.129796	-0.0826939	-0.0686369	-0.0880735
-0.0116941	-0.0105018	0.00346184	0.0204251	-0.00822879
0.214489	0.159571	0.397753	0.26162	0.306948
0.148586	0.0899789	3.93247	0.221347	0.458891
0.57576	0.491231	-3.47321	0.127567	0.109698
1.64159	1.12766	-0.258315	0.035972	-0.0889836
-2.09849	-1.36256	-0.140071	-0.208284	-0.259086
-0.383093	-0.473599	-0.185127	0.827308	-0.295757
-0.0974204	-0.172603	0.313671	-0.954436	-0.00771989
0.117149	0.121849	3.35071	0.369144	0.604341
0.519399	0.520236	-2.96454	-0.165287	0.0564319
-0.0242408	0.017157	-0.362245	0.134653	-0.266064
0.0265209	0.185514	-0.177253	-0.0912342	0.0506076
0.0491336	-0.0424073	-0.00671098	-0.0488975	-0.0804936
0.649507	0.707498	-0.090503	-0.181777	-0.0652631
-1.15638	-0.888847	-0.0817941	-0.203384	-0.329217
0.121951	-0.196466	0.10402	0.181571	0.164371
0.190755	0.159643	1.05953	0.270612	0.516078
0.596531	0.470507	2.61699	0.229895	2.03069
0.753708	0.547459	0.33167	2.45887	1.76989
-0.544644	-0.445482	-2.27279	-0.210441	-2.86177
-0.488608	-0.779228	-0.626399	-2.32654	-0.871595
-0.321973	-0.207006	-0.813714	-0.12368	-0.417961
0.431377	0.483382	0.329615	0.189578	0.407111
-0.30968	-0.105508	-0.260103	-0.136429	-0.262563
0.0846466	0.124871	0.224519	-0.00620242	0.229435
0.366075	0.361034	0.0486676	0.0738449	0.111774
0.0778387	-0.011591	0.451323	0.0244584	0.00771498
1.09927	-0.41938	0.506343	-0.149056	0.990002
-0.0650891	0.998518	-1.30465	-0.949764	-1.41742
-1.71953	0.231605	-0.468192	0.763902	-0.421106
-0.321271	-1.24689	0.0405006	-0.0913663	0.00949586
0.0639959	-0.165183	0.149649	0.0280795	0.156335
-0.0604776	-0.218882	-0.00594913	0.0791775	0.0330474
-0.0331928	-0.0630983	-0.0135982	-0.112734	-0.0686614
-0.116223	-0.123088	-0.35745	-0.422432	-0.34222
-0.0393043	0.017964	-0.254084	-0.0810125	-0.199714
0.28857	0.310749	0.564711	0.39501	0.504613
-0.13868	-0.14888	0.363766	0.23729	0.325536
0.0947183	0.0992903	-0.113594	-0.201517	-0.259731
0.196038	0.330518	0.0194957	0.203615	0.156094
-0.0904722	1.11061	-0.172019	-0.174994	-0.218606
-0.213866	-1.49649	-0.357983	-0.263772	-0.333501
-0.0462847	-0.0970973	0.143469	-0.0792728	-0.0351871
0.325109	0.324034	0.157508	0.303944	0.38839
-0.0171034	-0.0202137	-0.0867142	-0.0007786	-0.133649
-0.0814057	-0.116702	0.00674006	-0.0246161	-0.0497891
0.0886232	0.128897	0.475926	0.0190285	0.125392
-0.164972	-0.177249	-0.4101	0.0171876	-0.0167893
-0.222833	-0.214718	-0.378129	-0.440111	-0.366326
-0.0543648	0.0883118	-0.149262	-0.00240193	-0.189512
0.248531	0.428169	0.363075	0.399467	0.398556
0.068614	-0.112437	-0.0939274	-0.018087	0.0470293
-0.143426	0.117903	-0.131437	-0.397807	-0.148263
0.00606839	-0.349875	0.250256	0.216748	0.155033
-0.00920187	-0.073041	0.111117	0.130114	0.0961437
-0.111777	-0.12425	-0.351681	-0.378198	-0.315416
-0.0469709	-0.0101936	-0.190371	-0.0480927	-0.119508
0.118042	0.123043	0.153563	-0.0388303	0.12445
0.0426436	0.0549429	0.152749	0.310044	0.0606472
0.101228	0.0577479	0.270803	0.0908751	0.24689
0.0677981	0.0747967	0.114485	0.0582435	0.115882
-0.115112	-0.104364	0.027849	0.248743	0.00691725
-0.0746098	-0.0490399	-0.53318	-0.617876	-0.39604
0.165832	0.181394	0.202319	0.199225	0.193149
0.0804015	0.359059	0.220166	-0.0683792	0.114376
0.130473	0.0745557	0.0951827	0.0748658	0.0557027
-0.075671	-0.275489	-0.0666655	0.0205851	-0.0420942
0.129131	0.107701	0.0542003	0.0609913	0.129559
0.0546509	-0.070207	0.136756	0.138185	0.146036
-0.120068	-0.247849	-0.183427	0.0132852	-0.148546
-0.422988	-0.176454	-0.499841	-0.46385	-0.651586
0.25958	0.287552	0.380989	0.162608	0.456413
0.034479	0.0198679	0.0464432	0.343149	0.0629025
-0.0227827	-0.0453731	-0.0246803	-0.152004	-0.0398032
-0.210802	-0.20852	-0.237992	-0.103096	-0.218246
-0.0053895	0.000835158	0.0256712	0.168052	-0.00153399
-0.108775	-0.144376	-0.148127	-0.405463	-0.260329
0.0712269	0.0570882	0.0942026	0.128816	0.14061
0.233604	0.233526	0.230684	0.214262	0.258479
0.0370711	0.0090996	1.79303	0.0259285	0.122094
0.514272	0.486382	-1.216	1.2382	0.545969
0.24347	-0.0402067	0.0475828	-0.202112	0.157395
-0.265569	-0.0849458	-0.351515	0.0911737	-0.283785
-0.405451	-0.140872	-0.273071	-1.17196	-0.370618
-0.0281545	-0.0404126	0.0529735	0.227589	-8.50561e-09
0.0559306	0.0272875	0.0731533	0.507738	0.136769
0.00609648	-0.0881099	0.013183	0.679062	-0.0187099
-0.0660213	-0.0282109	-0.0607313	-0.942652	-0.0525062
-0.0941074	-0.0585733	0.0650574	-0.173863	-0.0526605
-0.157577	-0.179404	-0.103807	-0.15012	-0.154677
0.032892	0.0584918	-0.0478554	0.0310225	-0.0681302
-0.114913	-0.0744127	-0.140592	0.173201	-0.149265
0.0428855	0.0359968	-0.0395145	-0.263999	0.0540592
0.375378	0.298917	0.249523	0.183903	0.334813
0.0738391	0.139224	-0.0714432	0.046322	0.0411985
-0.0385006	-0.0521804	0.0515281	0.212247	0.0121194
0.0346203	0.0124655	0.046556	-0.104381	-0.0229031
-0.118436	-0.0814936	-0.0299264	-0.238752	-0.0591559
-0.044533	-0.0127959	-0.0418199	-0.0193731	-0.104482
0.33135	0.340983	0.221574	0.243662	0.387701
0.0642113	0.0682353	-0.0375365	-0.0632744	0.0593815
-0.176716	-0.19029	-0.0525433	-0.0978786	-0.154203
-0.274047	-0.258107	-0.211846	-0.163491	-0.256641
0.0597651	0.027511	0.1131	0.0059871	0.0736445
-0.228934	-0.200626	-0.207059	-0.0129704	-0.277075
0.389517	0.402571	0.412649	0.461554	0.448168
0.485517	0.460499	0.368959	0.0723671	0.413145
-0.133447	-0.175121	-0.0810315	0.387848	-0.074278
-0.0135473	-0.174035	-0.0789518	0.114101	-0.0245244
-0.0250602	-0.176463	-0.0598085	-0.614689	-0.0415907
-0.392334	-0.0399013	-0.109628	-0.0694533	-0.152034
-0.197652	-0.184925	-0.287698	-0.282718	-0.322607
-0.0150527	-0.0165398	0.0129304	-0.000524187	-0.0147751
0.0703048	0.00350573	0.116677	0.0599435	0.162063
0.202781	0.237529	0.106026	0.357976	0.142946
-0.0528226	-0.0246739	-0.0269985	-0.081607	-0.0654903
-0.124618	-0.0737073	-0.105998	-0.283798	-0.163914
0.131989	0.112148	0.000445938	0.225776	0.0473729
-0.142976	-0.146669	0.0162458	-0.208076	-0.0838558
-0.167421	-0.11904	-0.265532	0.180039	-0.319981
0.305457	0.271357	0.284389	-0.00758964	0.363848
-0.0942548	-0.124799	-0.0631742	0.0342384	-0.0877634
-0.0998578	-0.0836561	-0.13	-0.573601	-0.0586614
-0.0869202	-0.0820073	-0.254605	-0.473721	-0.14026
0.0607123	0.0541802	-0.0370302	-0.101064	0.0496968
0.0315718	-0.0128941	0.251083	0.390677	0.0341037
-0.0273717	0.00802257	0.0501633	0.612637	-0.049186
0.138229	0.145987	0.0755455	0.51114	0.205723
-0.080181	-0.0485439	-0.0917247	0.668356	-0.119821
-0.0161334	-0.0369774	0.00881091	-0.901239	-0.0244856
-0.120697	-0.171747	-0.119114	-0.224508	-0.0748293
0.0247496	0.0502663	-0.0438126	-0.365101	0.0103511
-0.152611	-0.158219	-0.22272	-0.66989	-0.274571
0.0455137	0.0374884	0.269704	0.086959	-0.0281169
0.0767951	0.0397764	0.0862045	0.278818	0.166559
-0.00616502	0.0101631	0.0282582	-0.193919	0.0546937
0.135676	0.100933	0.0793962	0.170524	0.0795853
-0.113397	-0.0669119	-0.109053	0.199759	-0.111001
0.224069	-0.0462031	0.599286	0.971641	0.242347
-0.106501	-0.0608328	-0.437332	-0.781135	0.017999
0.0153123	0.0910832	-0.0941348	0.627307	-0.00385809
0.251034	0.123065	0.313711	1.24992	0.289826
-0.0495794	-0.0140499	0.0642886	-0.639441	-0.0101765
-0.1703	0.00366276	-0.269836	-1.24944	-0.205962
0.0986975	0.10521	0.0961627	-0.0742428	0.057805
-0.283789	-0.255618	-0.317263	-0.177757	-0.309401
-0.0427845	-0.0585067	-0.0718578	-0.257131	-0.00073006
0.0394969	0.0718941	0.0109012	0.139888	0.0377391
-0.157665	-0.127586	-0.197535	-0.138757	-0.199089
0.202586	0.197881	0.172267	0.235851	0.221835
0.4356	0.39945	0.504006	2.55992	0.448199
1.45847	1.5408	-0.32821	0.647772	-0.166772
-1.64557	-1.56508	-0.00195909	-0.243043	-0.0596265
-0.231061	-0.33803	-0.187829	-2.74304	-0.284822
0.0292568	-0.002087	0.0530166	0.487338	-0.0601932
-0.0517039	-0.0158357	0.0725206	2.20285	0.135229
-0.102649	-0.162149	-0.0256893	0.414566	-0.0574456
-0.0470761	-0.0384612	-0.0424971	-1.40931	-0.0728279
0.174218	0.21847	0.140112	0.0198432	0.207721
-0.18742	-0.145403	-0.281567	1.10278	-0.276183
-0.0748868	-0.123741	-0.144165	-2.98694	-0.104093
-0.0459767	-0.00854314	0.013522	-0.0396389	-0.0621828
-0.00148234	0.0344554	-0.0286024	-0.0550613	0.0412816
0.0691916	0.0198665	0.134399	0.363889	0.125622
0.0826346	0.0485251	0.0611041	0.414065	0.0487083
0.117788	0.115422	0.0990601	0.0716811	0.0830033
-0.108485	-0.0998419	-0.0635869	-0.635962	-0.101176
-0.0601866	-0.0611719	-0.0853613	-0.390547	-0.0635266
-0.14	-0.0898361	-0.272524	-0.57694	-0.221075
0.0654231	0.0489387	0.0120771	0.426673	0.0662622
-0.0201138	-0.00169005	-0.100157	-0.135631	-0.123079
-0.0410389	-0.0506948	0.0326416	0.109938	0.0300091
0.98506	0.623096	0.32358	0.306181	0.414007
-0.717026	-0.423193	-0.0746754	-0.152286	-0.134788
-0.0742785	-0.0731486	0.108263	0.0285459	-0.0419863
0.09656	0.133799	0.124619	0.114349	0.104561
1.37741	0.726143	0.0725041	0.150906	0.0664798
-1.22989	-0.674152	-0.0282514	0.000955601	0.0057944
0.0947952	0.0847424	0.107736	0.155124	0.207734
-0.11464	-0.0402966	-0.155674	-0.164988	-0.141736
-0.0988907	-0.0469193	-0.187658	-0.157073	-0.118959
-0.0981702	-0.110323	-0.0612715	-0.066831	-0.111188
-0.03743	-0.021683	0.0102055	0.00105557	-0.0335067
0.121442	0.0489361	0.156115	0.171802	0.18251
0.0747847	0.0754109	0.163465	0.164529	0.152501
-0.0611219	-0.0439687	-0.131821	-0.163689	-0.168688
0.33376	0.387239	0.236664	0.242823	0.25098
-0.330626	-0.322231	-0.283918	-0.269953	-0.268589
-0.143424	-0.21598	-0.161053	-0.143275	-0.161745
-0.162566	-0.117291	-0.245238	-0.243176	-0.367008
0.0441793	0.0402859	0.0433364	0.134344	0.210735
0.0246154	0.0178907	0.0422162	0.00699312	0.0560386
-0.00364845	-0.00289192	0.151558	0.126031	0.0859721
0.317596	0.20774	0.418738	0.327157	0.377818
-0.0976535	-0.0425434	-0.196837	-0.11455	-0.149012
-0.0423822	-0.00147571	-0.0732682	-0.114688	-0.095862
-0.0391577	-0.0189148	-0.150447	-0.159389	-0.138429
0.0307613	0.00302853	0.0440079	0.0393607	0.0699659
0.13443	0.139353	0.130031	0.0990944	0.105738
-0.135247	-0.136399	-0.0381725	-0.0795796	-0.117642
0.0646393	0.0214354	0.000587432	0.0676527	0.0735867
-0.152443	-0.0339189	-0.122145	-0.132594	-0.152203
0.0679355	-0.00455594	0.0686468	0.06866	0.0390818
-0.0664382	-0.0613256	-0.290646	-0.17843	-0.181549
0.22372	0.201038	0.457735	0.433229	0.350309
-0.0199857	-0.0329522	0.137829	0.0069044	0.0320641
-0.0876601	-0.0503102	-0.152969	-0.0928645	-0.0891099
-0.107522	-0.0771151	-0.457223	-0.376831	-0.248035
-0.0151423	-0.0348004	0.203375	0.0338385	0.0430594
0.0482994	0.0473995	0.013332	-0.0230753	0.0337223
0.0703453	0.100217	0.0545488	0.0878797	0.054152
0.00643695	-0.0676917	0.0673674	0.237875	0.113119
0.113084	0.0621542	0.114607	0.0352692	0.109878
-0.151789	-0.115419	0.0585837	-0.0189063	-0.0716312
-0.0638328	-0.0942955	-0.0981701	-0.131739	-0.101125
-0.0560359	-0.0188061	-0.173165	-0.0918675	-0.104708
-0.137123	-0.105089	-0.526627	-0.433529	-0.331898
-0.0452427	-0.042159	0.0369843	-0.00402692	-0.0331533
0.107218	0.0691073	0.459255	0.40223	0.348943
0.293008	0.0233666	0.24307	0.263903	0.259039
-0.0357276	0.0736432	-0.188045	-0.125708	-0.0712781
-0.0606468	0.948808	0.0125032	-0.0277013	-0.0588224
-0.133223	-1.04624	-0.104187	-0.167068	-0.156012
0.0312069	0.0645613	0.024168	0.0303531	0.0587671
-0.101292	-0.0824779	-0.129966	-0.155573	-0.15483
0.335313	-0.0294303	0.358815	0.204082	0.378086
-0.0891406	0.221091	-0.067648	0.121148	-0.040521
-0.0754737	-0.018586	-0.0358397	0.66443	-0.0211239
0.00515137	-0.00850546	0.0470442	-0.676268	0.0178063
0.0735021	0.131894	0.107559	0.146524	0.0655432
-0.0610054	-0.0591091	-0.265526	-0.210385	-0.152455
-0.0637695	-0.0436094	-0.161085	-0.273823	-0.18707
0.0688008	0.0459825	0.193576	0.230319	0.165978
0.0793502	0.053862	0.1928	0.0878159	0.0883681
-0.104743	-0.0665763	-0.601795	-0.505269	-0.546592
-0.0117475	-0.0235006	0.199957	1.45461	0.288076
0.0437266	0.0338883	0.221692	-1.07123	0.0953132
-0.0105214	-0.000281454	0.0721186	-0.226146	-0.0146033
0.0200829	0.0426459	-0.158651	0.00841316	-0.061094
0.418191	0.389711	0.39074	0.606671	0.559165
-0.115074	-0.160844	0.0739548	-0.0571302	-0.0705904
-0.0325749	-0.0236769	0.083106	0.0289093	0.0107382
-0.228346	-0.185227	-0.237901	-0.305076	-0.265281
-0.0428431	-0.0482395	1.32183	-0.0983245	-0.153731
-0.0715687	-0.0889027	-1.92571	-0.447914	-0.287998
-0.0114899	-0.040753	0.0228315	0.0985919	0.0410939
0.0982581	0.151837	0.659881	0.441887	0.4069
0.0780916	0.048332	-0.0439194	0.16718	0.0815341
-0.0601612	-0.0421755	-0.111224	-0.0684206	-0.0500561
0.271828	0.270584	0.209462	0.270681	0.244856
-0.203162	-0.186528	-0.0619996	-0.137561	-0.151417
-0.0620239	-0.0460285	-0.102112	-0.161965	-0.114114
-0.0582889	-0.0333673	0.0175502	-0.0431467	-0.0639982
0.133698	0.115788	0.170861	0.151979	0.165904
0.0970796	0.00991272	0.160535	0.129341	0.115259
-0.164049	-0.120805	-0.327236	-0.182517	-0.176602
-0.0622152	-0.0470223	-0.172194	-0.0989871	-0.0856433
0.0779458	0.0651495	0.184436	0.0678508	0.106807
0.0791913	0.168295	0.139667	0.121508	0.118228
0.137865	0.0916195	0.12248	0.109833	0.124386
-0.0862647	-0.123179	-0.0116941	-0.0199336	-0.0138436
-0.0972427	-0.0460727	-0.245276	-0.182019	-0.169583
0.0552718	0.0669441	-0.0810283	-0.0196984	-0.0418106
0.02421	0.02688	0.132306	-0.0330611	0.0343319
0.0548726	0.0576951	0.0439732	-0.216777	0.0781703
-0.050147	-0.0583298	0.00512758	0.39344	-0.122792
-0.0524439	-0.0218744	0.000967146	0.0275286	-0.103688
0.149543	0.0858268	0.112462	-0.670219	0.303108
0.367864	0.4408	0.314558	0.900314	0.32796
-0.329048	-0.355776	-0.245505	-0.110264	-0.308075
-0.0289534	-0.112348	-0.0214761	-0.00978282	0.0177109
0.112685	0.0802597	0.0990087	0.0745898	0.121678
-0.233474	-0.250904	-0.244692	-0.16573	-0.26379
-0.109192	-0.0534587	-0.21726	-0.34815	-0.262822
0.0962868	0.0746479	0.0237438	0.199841	0.210256
-0.0103853	0.056722	0.130218	0.143675	0.0960459
0.045231	0.0390451	-0.0220106	-0.154155	0.00463046
0.0100871	-0.000990573	0.0277127	0.172052	0.0026704
0.172038	0.10105	0.308283	0.178385	0.223871
-0.243856	-0.175738	-0.176521	-0.07648	-0.201167
-0.157126	-0.164304	-0.201162	-0.135526	-0.229625
0.139909	0.144234	0.0987764	0.137213	0.12635
-0.0272807	-0.0641288	-0.119635	-0.0346685	-0.10023
0.412865	0.359564	0.265706	0.02908	0.304395
-0.31786	-0.270345	-0.0937283	0.0160548	-0.125684
-0.0506312	-0.0456735	-0.0339069	-0.0397586	-0.0489963
-0.193808	-0.205306	-0.180593	-0.133438	-0.196209
-0.0279541	0.015243	-0.1614	-0.0184519	-0.0958081
0.146616	0.113895	0.182183	0.109606	0.201541
0.0719261	0.0115319	0.137007	0.0378551	0.102484
-0.0628553	-0.0492174	0.0125426	0.0423925	-0.0697416
0.136577	0.103473	1.01409	0.02661	0.149965
0.171684	0.157101	-0.647421	0.752203	0.138226
-0.15602	-0.130015	-0.359937	-0.838642	-0.200864
-0.0146034	-0.0352403	0.0393563	-0.000788734	0.00626693
0.0878331	0.143481	2.33302	0.080448	0.105297
2.13484	2.05699	-2.27162	-0.0605848	0.245446
-2.26999	-2.10466	-0.00557936	0.0436932	-0.301822
-0.135762	-0.108067	-0.058793	0.0394352	-0.0899967
-0.0451779	-0.114897	-0.0739903	0.0388353	-0.0518313
-0.0263517	-0.0589387	-0.036761	-0.153921	-0.0513358
0.00248371	-0.0165185	0.136445	0.13924	0.210507
0.154443	0.0945458	0.537958	0.107653	0.27913
0.159933	0.153752	2.80542	0.116855	0.538912
0.159053	0.199529	0.219419	0.0131167	-0.300446
-0.105661	-0.122445	-0.0907319	-0.0795743	-0.371928
-0.209286	-0.311569	-0.469517	-0.135327	-0.158665
-0.0427455	0.000855389	-2.79556	0.00383922	-0.0875013
-0.037763	-0.0234566	0.973352	-0.00659378	-0.0105601
1.0324	1.07479	-0.956183	0.0133202	0.110968
-0.95331	-0.580699	-0.388274	-0.0934705	-0.164315
0.070034	-0.2492	0.120566	-0.0267397	0.106151
2.59559	2.40824	4.1799	0.18403	1.68379
1.13912	0.762641	-3.95635	-0.157338	-1.42905
-3.34649	-2.87455	-0.266752	0.112772	-0.247582
0.699952	0.714681	-0.120431	-0.236253	0.0759472
-1.00282	-0.680032	0.164789	0.125599	-0.0508361
-0.109913	-0.354161	-0.101875	-0.057491	-0.0679094
0.339227	0.313978	0.229062	0.131462	0.234772
1.2715	1.26158	0.0327807	0.0180822	0.0226011
1.41049	1.29657	-0.225616	-0.103196	-0.102467
-2.30874	-2.21213	-0.168804	-0.128233	-0.252224
-0.733954	-0.662558	-0.00890631	0.195742	-0.0523576
-0.00543748	0.0314932	0.159385	0.0600885	0.153595
-0.0821901	-0.212453	0.0198786	-0.122828	-0.00684077
0.00486603	-0.0892069	0.00426839	0.0106414	0.0119712
-0.0637246	-0.0384804	-0.168949	-0.230151	-0.122569
-0.0418136	-0.00620043	-0.0184533	-0.0675972	-0.0662691
-0.0601849	-0.0568511	-0.112059	0.052966	-0.117855
-0.000934644	0.0370757	0.00050095	0.0247054	-0.00946805
4.06413	1.06438	0.207686	0.529483	0.221176
-1.45661	0.331883	-0.133116	0.232956	-0.1013
-2.35249	-0.706275	0.150375	-0.150933	0.119733
-0.0290958	-0.0485054	-0.197145	-0.123287	-0.0699886
-0.142524	-0.287076	0.012282	-0.298105	-0.0811594
-0.069408	-0.369877	-0.0246664	-0.127468	-0.134687
0.0501637	0.105602	0.0624309	-0.0480857	0.0819647
0.146402	0.121488	0.178318	0.100403	0.231442
0.150417	0.0743326	0.179943	0.125465	0.146462
1.08931	0.43204	0.652496	-0.067154	0.613372
2.24866	1.10288	-0.916461	-0.149462	-0.742532
-3.59693	-1.82402	-0.198401	-0.0900098	-0.259124
-0.0439924	-0.0694953	0.195328	0.348837	0.0152675
-0.102264	-0.0945964	-0.134594	-0.331753	-0.168401
0.272849	0.288136	0.26202	0.142181	0.395493
0.135869	0.0710258	0.152574	0.0434724	0.0878926
0.122789	0.160079	-0.129628	-0.0464492	0.0577264
-0.154644	-0.248995	-0.377371	-0.285551	-0.364893
-0.40335	-0.380363	-0.395091	-0.1074	-0.376132
-0.0393129	-0.031623	0.256733	0.0743403	0.10747
0.124099	0.172184	0.179948	0.0483034	0.134016
0.0524372	0.041429	0.166048	-0.0180968	0.0963887
0.20853	0.291929	0.0883934	0.150573	0.216197
0.0942986	0.0403327	0.260021	0.0621783	0.182608
-0.112485	-0.137568	-0.111347	0.109828	-0.0710063
-0.252266	-0.232027	-0.51582	-0.335628	-0.429294
0.00577222	0.0628559	-0.267043	-0.30913	-0.17496
-0.0102109	0.0573207	0.299133	0.189595	0.148847
0.0598657	-0.0229307	0.197689	0.328601	0.166156
0.109383	0.0628182	0.104735	-0.00444768	0.102717
0.0215492	0.0343041	-0.0099964	0.0157087	-0.011836
-0.0491676	-0.0716682	0.032144	0.109354	-0.0150343
0.170385	0.130148	3.25373	-0.0522807	0.198496
0.461964	0.203961	-2.60554	0.288186	0.428532
-0.152441	-0.0150294	0.979872	-0.108257	-0.322623
0.134746	0.237089	2.42871	0.00708161	3.61638
1.14814	-0.267076	-3.91609	-0.11253	-3.3941
-1.6933	-0.240718	-0.344827	-0.145239	-0.567088
-0.194099	0.0414525	-0.0470115	-0.103524	-0.103438
0.0762637	-0.130529	1.56238	0.11754	0.139391
0.0493708	0.00490068	-1.39943	-0.0752448	0.0070708
-0.244397	-0.0961495	-0.626371	-0.350771	-0.548348
0.0851891	3.70027	0.433435	0.167437	0.346544
0.09512	-3.57267	0.211162	0.0482924	0.120509
0.0950503	0.0681127	0.0322579	0.0580519	0.0597086
0.724847	1.48913	0.389629	0.193339	0.20537
2.399	-1.00719	-0.175502	0.036458	0.116276
-1.36099	-0.46869	-0.367993	-0.193653	-0.383639
-1.78896	-0.0252816	0.0755989	-0.0587699	0.0104191
0.233642	0.27905	0.210433	0.131714	0.217375
0.105441	-0.00587539	-0.0712675	-0.0172054	-0.0386862
-0.051529	0.449091	0.00644171	0.00741922	0.0390707
0.0312347	-0.181279	0.163908	0.0701278	0.10364
-0.158205	-0.457912	-0.273386	-0.0870494	-0.184873
-0.0154394	-0.0882723	0.113174	0.0391212	0.0701177
0.103192	0.120054	-0.0415926	-0.0309229	0.0783695
-0.0965933	-0.0716565	-0.100082	0.000178997	-0.138694
0.0268485	0.0567695	1.82068	0.021554	1.76463
0.166912	0.139316	0.316001	0.105469	0.3155
2.29468	-0.171441	-1.93528	-0.0534421	-1.97838
-2.41037	0.12836	-0.147109	-0.087722	-0.0809569
-0.26295	-0.314505	-0.141424	-0.0423259	-0.187559
-0.0275107	-0.11325	0.110306	-0.00197727	0.0433773
0.250621	0.292623	3.02026	0.40322	2.8005
0.19201	0.190481	1.33859	-0.194106	0.253767
0.20193	0.121993	-1.33899	0.187775	-1.42767
1.0026	-0.23221	-2.70041	-0.165219	-1.20123
1.07459	0.295309	-0.0424603	-0.0247165	-0.106535
-2.49278	-0.341965	-0.0418246	-0.153559	-0.168252
0.0051605	0.0169649	-0.0853022	-0.0267409	-0.00344615
0.203715	2.79862	0.0951434	0.0953764	0.146236
-0.270188	-2.87827	-0.0987787	-0.0921646	-0.168453
-0.0809213	-0.18707	-0.0973172	-0.0367859	-0.0794322
-0.0135608	-0.076489	-0.0168766	-0.0350946	-0.0253585
0.095567	0.0215199	0.284144	0.162365	0.268658
-0.194993	-0.149155	0.0523915	0.00124343	0.00950025
0.207487	0.258076	-0.228325	-0.134689	-0.178367
2.14561	0.443149	-0.0129665	0.0365434	0.217187
-1.99989	-0.18295	0.0199899	0.0491433	-0.111556
-0.155569	-0.20362	-0.041872	-0.0299723	-0.0568103
-0.0426522	-0.0395566	0.0400954	0.0305873	0.0199812
-0.0252137	-0.0164825	0.193577	0.015604	0.0521317
-0.036209	-0.0642178	-0.323219	-0.157731	-0.23718
-0.0921381	-0.00924708	-0.364743	-0.129653	-0.188372
0.0096541	0.0367159	0.0829374	0.205944	0.0584538
0.0592528	0.0173614	0.184836	-0.128281	0.106582
-0.0179034	-0.029261	0.119664	0.0739365	0.0376783
0.117585	0.111185	0.126409	0.0396673	0.0796333
0.0691774	0.0696761	0.0140125	0.0498694	0.098716
-0.130853	-0.113522	-0.181797	-0.105139	-0.170286
-0.0391353	0.16306	-0.0730848	-0.0904435	-0.0689455
-0.0016178	0.138747	-0.215846	-0.192966	-0.144034
0.166612	0.715929	0.174981	0.10344	0.0760865
-0.173779	-0.185457	-0.0250225	0.0943357	0.00738877
-0.0603611	-0.906587	0.00505342	0.0169097	-0.0132916
0.0168023	-0.0687687	0.0257462	-0.00638524	0.0441728
0.00331962	-0.0546758	0.0518697	-0.0141335	-0.0289458
-0.0587102	0.0129604	-0.0799714	0.000962758	-0.0641268
0.315073	0.20349	0.388687	0.242006	0.370276
0.102311	-0.0060401	0.103037	0.0484386	0.0982931
-0.0534983	0.0982029	-0.050831	0.00311002	-0.0566772
-0.0194828	0.078938	-0.0179679	-0.10282	-0.061412
0.07498	0.0416755	-0.0330474	0.0375255	0.0616732
-0.121477	-0.168209	-0.141638	-0.0939113	-0.177313
-0.143567	-0.0792802	-0.226323	-0.135958	-0.209045
0.055344	0.1194	0.123084	0.0848851	0.130757
-0.0305829	-0.0567224	-0.0552797	-0.131685	-0.0925298
0.0653034	0.0648662	0.105224	0.138013	0.066131
0.151014	0.158449	0.109915	0.0777156	0.193724
0.930779	-0.0462595	-0.0304229	-0.0751229	-0.0869647
-1.12286	-0.129805	-0.0446847	-0.0504698	-0.14607
-0.0635689	-0.0485639	-0.196046	-0.107773	-0.0948205
0.201606	0.238058	0.33226	0.130388	0.238121
-0.0801117	-0.0881455	-0.198835	-0.0513234	-0.13413
-0.135164	-0.127264	-0.0650431	-0.00775744	-0.00741844
-0.0294022	-0.0921209	-0.0365487	-0.00460722	-0.00257528
-0.0239798	-0.0112513	-0.0737012	-0.0922993	-0.0649916
-0.0415475	-0.0705139	-0.0895552	0.160907	-0.0532184
-0.00787464	-0.0122002	0.0382305	-0.102096	-0.00223474
-0.0482049	-0.0750712	0.0297656	-0.0412771	0.00588011
0.102068	0.176917	0.099069	0.0593197	0.132516
0.0680152	0.0645991	0.121047	0.0314168	0.097424
0.0430612	0.104861	0.011929	-0.0730977	-0.0048304
-0.000281483	0.0290251	0.0624942	0.0438189	0.0375814
-0.0261491	-0.0155842	-0.0327533	-0.0543731	-0.0689544
-0.03947	0.176526	-0.201785	-0.00985489	-0.126792
0.018977	-0.196419	0.334837	0.00247671	0.161809
1.39183	-0.0891762	-0.00961695	0.077721	0.0758038
-1.42771	-0.00584338	-0.0171605	0.0326709	-0.0152093
-0.0330811	-0.0659042	0.244585	0.210035	0.248728
-0.0203787	-0.0877412	-0.33345	-0.213157	-0.301149
0.145574	0.306499	0.352711	0.0268418	0.0369371
-0.104966	-0.068084	-0.395742	-0.259041	-0.177707
0.0230819	-0.0132353	0.0455208	0.17595	0.0729824
-0.0355467	-0.009605	0.491793	-0.00464317	0.798357
0.0273172	0.0338366	1.05237	-0.00153787	1.23797
0.0932142	0.155496	-1.51366	-0.00102183	1.96145
-0.107614	-0.139628	-0.171921	-0.000440828	-3.99531
-0.0792063	-0.115064	-0.124614	-0.12477	-0.138457
0.0163248	-0.000936568	0.129653	0.000544132	0.0030925
-0.0787067	-0.100765	-0.153874	-0.00871504	-0.0951169
0.110195	0.0848718	0.539404	0.38994	0.501211
-0.0386272	-0.0258329	-0.304365	-0.17616	-0.139522
0.0342949	0.0596198	0.0266637	0.00384166	-0.023588
0.0862836	0.023998	0.114338	0.00714582	0.0519538
-0.0649989	-0.113769	-0.188042	-0.118971	-0.16474
-0.0628355	-0.0103034	-0.0550352	-0.174965	-0.0663492
0.0607098	0.0779349	0.0515775	0.0939079	0.074589
-0.0216625	-0.0119907	-0.0696053	0.005075	-0.0658498
0.0936575	0.0688166	0.16087	0.11814	0.157782
-0.0694165	-0.0589679	-0.0705758	-0.241553	-0.081025
0.0286696	0.0750551	-0.0143463	0.0354516	0.0169448
-0.0637091	-0.0603752	-0.0604602	0.017401	-0.0930992
0.0264884	0.0857635	-0.0495859	-0.013314	-0.0655042
0.150414	0.0738892	0.0656442	0.137639	0.183827
0.0540986	-0.0594689	0.169149	0.17027	0.157436
0.206842	0.128502	0.27586	0.457802	0.280498
-0.209103	0.392635	-0.262578	-0.154117	-0.207882
0.214145	-0.679656	0.18605	0.834556	0.203654
-0.0316853	-0.00597782	-0.0808667	0.393764	-0.100771
-0.0269016	0.211754	-0.00958236	-0.413995	0.0363452
0.135484	-0.132311	0.207567	-0.0621699	0.158704
-0.147632	0.102751	-0.137884	-0.58854	-0.0868877
-0.239975	-0.173936	-0.0922246	-0.0929566	-0.093626
-0.0401813	-0.0059876	-0.047341	0.03275	-0.124763
-0.0721551	-0.128361	0.0110673	-0.172727	-0.0244496
0.12584	-0.0403438	0.0902992	2.67448	0.120734
-0.0760407	0.175217	-0.382904	-1.70502	-0.317461
-0.0335009	-0.158918	0.271889	-0.975502	0.155332
0.212508	0.0928023	0.135844	0.0320181	0.113079
-0.0151373	0.00636778	-0.095921	1.08267	-0.114192
-0.071493	-0.11361	-0.0716018	-1.11284	-0.0791566
-0.174865	0.0290546	-0.196546	-0.100114	-0.164559
-0.00512115	0.0883552	-0.0382973	-0.141878	-0.0405348
-0.0973143	-0.0182781	-0.201845	-0.12299	-0.181576
0.198531	0.210933	0.367777	0.187029	0.301709
0.0306982	-0.0925972	0.0819083	0.048262	0.0870306
-0.0112324	-0.136799	0.00300818	-0.00739917	0.0125389
0.0456783	0.237505	0.107723	0.065047	0.129793
0.0472511	-0.0432894	0.00988244	0.123208	0.0305192
0.510871	0.0214235	0.356831	0.349106	0.400086
-0.144526	0.12791	-0.152037	-0.16309	-0.208189
-0.12576	0.0345515	-0.100217	-0.141835	-0.1394
-0.362255	-0.243985	-0.325045	-0.211506	-0.323374
-0.115852	-0.0134752	-0.195011	-0.144076	-0.132355
0.151383	0.145851	0.210221	0.0883815	0.142931
-0.0880207	-0.0757447	-0.108986	-0.118551	-0.0963029
0.187899	0.00871262	0.329337	0.284122	-0.0376027
-0.14129	-0.0556662	-0.294319	-0.209151	-0.0276507
0.0655205	-0.0922571	0.27739	0.00391098	0.0345705
-0.0474138	-0.0138207	0.111044	0.0832466	0.131224
-0.204869	-0.0776008	-0.544282	-0.203242	-0.198817
-0.00899556	0.00839423	-0.0437979	-0.154159	-0.0752217
0.00230337	0.00916978	0.010293	0.0249114	-0.00776978
0.020224	-0.101867	0.0278828	-0.0169499	-0.130307
0.0730514	0.090773	0.158599	0.0439069	0.136942
0.291595	0.161319	0.954874	1.11226	1.16598
-0.0615033	-0.0819956	-0.757263	-0.68532	-0.731895
-0.155559	0.0725099	-0.146826	-0.157087	-0.124979
-0.171384	-0.103343	-0.245151	-0.230117	-0.231332
0.0142428	-0.0380193	0.0267096	-0.0123833	-0.0380684
0.386631	0.143275	0.322137	0.286764	0.336294
0.046968	0.201895	0.0728899	0.0186837	0.0660883
-0.0188842	0.0729397	-0.0873429	0.00533084	-0.014091
1.44597	0.134844	0.376625	0.228788	0.2602
-1.42504	-0.133917	0.0144841	-0.113065	-0.212407
-0.155741	-0.211976	-0.11904	-0.0615397	-0.0849573
0.0423324	0.0051962	-0.190244	0.0614794	-0.0137184
-0.0480414	-0.0723353	-0.118169	-0.0350385	-0.147571
0.00546277	0.131021	-0.062752	-0.00869588	-0.0654886
-0.0734435	-0.104485	0.0770399	0.036138	0.152852
-0.0459379	-0.0921001	-0.0254686	-0.0442398	-0.0334359
0.116417	0.0957984	0.111332	0.179709	0.0238318
-0.0704485	-0.0650348	-0.0617272	0.028699	-0.07071
-0.0831497	-0.0869498	-0.226528	-0.284465	-0.120194
-0.0560918	-0.109169	-0.21359	-0.101541	-0.0920634
-0.0762398	0.0364976	-0.00711631	-0.172427	-0.108681
0.0709329	0.0283345	0.150625	0.0797587	0.127449
-0.0480543	-0.0271083	-0.216948	-0.146161	-0.102294
0.0305163	0.0520209	0.0543697	0.0577782	0.129545
0.0742555	0.059571	0.268499	0.0893205	0.0746142
0.0212749	0.00614787	-0.0182358	0.040562	-0.0449579
-0.0429037	0.0137767	-0.191477	0.143237	-0.119416
0.0420925	0.0604937	0.21854	-0.220221	0.139135
0.0819033	-0.00972879	0.102847	0.176024	0.132518
0.083398	0.0791811	0.0891791	0.144585	0.14483
0.000890893	0.0146571	-0.00416991	0.00410709	-0.0408116
0.0967978	0.0527429	0.0655726	-0.00600301	0.088138
-0.0530578	-0.101238	-0.020661	-0.0333148	-0.0320791
-0.0258974	-0.117054	0.0495742	0.0291841	0.0222388
-0.0396108	0.0644753	-0.144361	-0.0969014	-0.12267
0.143908	0.101292	0.114716	0.0403675	0.146812
-0.181492	-0.0983512	-0.148849	-0.0351738	-0.16411
-0.0278322	-0.0904766	-0.0396701	1.41708	-0.0606336
-0.0613504	-0.0455344	-0.120346	-1.52633	-0.182264
-0.000669843	0.0354308	-0.0316965	0.00107816	0.0512555
-0.125124	-0.0620005	-0.247329	-0.130395	-0.142849
0.0523179	0.0877978	0.240892	0.0752685	0.133436
0.162288	0.170527	0.288253	0.141501	0.209548
0.0559664	-0.00644522	0.0432332	0.0969896	0.0795667
-0.11658	-0.0983549	-0.186841	-0.0487911	-0.109711
0.155764	0.0914138	0.212628	0.175343	0.190523
0.141347	-0.153727	0.134046	0.147601	0.126289
0.0660823	0.0484421	-0.178088	2.53647	-0.0516849
-0.117734	-0.0439726	0.00620187	0.53112	-0.0675857
-0.128199	-0.0861174	-0.00986	-3.29573	-0.0948789
2.27241	0.123218	-0.0214951	0.0154762	0.0343886
-2.25759	-0.0591802	-0.0202807	-0.0140311	0.0105374
0.015111	0.0156846	0.110147	-0.0393639	-0.0162371
-0.115559	-0.0900087	-0.171194	-0.0987674	-0.130858
-0.129874	-0.128818	-0.323982	-0.233496	-0.212709
-0.058414	0.143161	-0.0552439	-0.0285475	-0.0526886
0.141505	0.155093	0.317595	0.217868	0.254404
0.10761	0.0506828	0.08514	0.0745041	0.0986918
-0.063767	-0.0585767	-0.175246	-0.115481	-0.0505606
-0.0988009	-0.0496474	-0.11936	-0.0870172	-0.196381
0.0264272	0.0246525	0.0837585	0.0598923	0.0441899
0.0434942	0.132755	0.0261545	-0.0719349	-0.0206875
-0.00638729	-0.00880972	-0.0813335	-0.0158487	-0.0794662
0.117551	0.140867	0.182698	0.166319	0.226661
-0.0823585	-0.0687813	-0.105913	-0.0655917	-0.0751395
0.0480029	0.0287655	0.0983125	0.104053	0.136014
0.0359548	0.0277865	0.00387329	0.0294117	0.0249486
-0.0459544	-0.0552109	0.0300763	-0.101376	-0.0782351
0.0768821	0.0466997	0.137975	0.0762334	0.064915
-0.068383	-0.0395402	-0.138659	-0.117542	-0.130831
-0.0213386	0.024798	-0.0438235	-0.0042745	0.00417254
-0.0215224	-0.0321045	-0.212996	-0.118441	-0.114016
-0.0111426	-0.0275096	1.74543	0.13246	0.148903
-0.0107034	-0.033389	-1.57499	-0.00850258	-0.0611227
-0.0142049	-0.159205	-0.0655172	-0.163109	-0.0753937
-0.00248738	0.0242526	-0.0517164	-0.00535665	-0.0476977
-0.093879	0.0631304	0.0522877	-0.0324674	-0.0869593
0.160914	0.0990385	0.243839	0.247809	0.309275
0.0482791	0.0105538	-0.007343	0.0454291	0.053062
-0.0699027	-0.0757279	-0.295374	-0.11543	-0.12631
0.00545854	0.0469377	0.0410615	-0.0210037	-0.0117273
-0.0201156	-0.0614706	-0.00612829	-0.0230823	-0.0194879
-0.00791302	-0.0515668	0.199023	0.0165012	0.00381658
-0.0413931	-0.0245939	-0.161272	-0.0824204	-0.0713635
0.0651411	0.102891	0.176425	0.147043	0.159467
0.018362	0.01319	-0.0493012	0.638481	0.00716919
-0.0866478	-0.128581	-0.206014	-0.600347	-0.117337
0.0505066	-0.0134614	0.132638	-0.0900264	0.0389236
0.0150227	0.133316	0.126056	-0.000801453	-0.0169883
0.0119464	0.00595708	-0.106543	-0.0615459	-0.0282178
-0.044571	-0.0234114	-0.0694932	-0.0167097	-0.149511
0.0299385	0.0531378	0.0590554	-0.00869687	0.155712
0.0326773	0.0622736	0.0826866	0.0795494	0.106578
-0.0279866	-0.0738176	-0.016189	-0.0295669	-0.0199633
0.0109321	0.00286333	-0.00960748	0.0355143	-0.0166005
0.0133803	0.0283365	-0.0544259	-0.0950591	-0.0260943
-0.00890448	-0.0516784	-0.146493	-0.146579	-0.119389
-0.0810715	-0.0238406	-0.0286405	-0.0834981	-0.107182
0.0480715	0.0564089	-0.100021	0.0836212	0.101012
0.0822458	0.0598344	0.180421	0.0798128	0.101036
0.150337	0.113318	0.266868	0.186277	0.19592
-0.0728773	-0.172006	-0.0179153	-0.0080408	-0.0346091
-0.108433	-0.0332575	-0.193927	-0.123932	-0.165674
-0.0605689	-0.0139157	-0.192997	-0.112906	-0.126037
-0.0866972	-0.0606776	-0.49741	-0.170203	-0.205476
0.0549838	0.069906	0.44626	0.294392	0.274237
0.0515989	0.0090098	0.326301	-0.015753	0.05895
-0.00483684	-0.0199823	-0.114749	-0.0148654	-0.00553292
0.00519191	0.0422299	0.11768	0.0120344	0.00965578
0.0212508	-0.0176085	0.117707	0.0320557	0.0580916
-0.00917677	0.015848	-0.115683	0.0137255	-0.0252291
-0.079176	-0.026085	-0.114888	-0.10365	-0.0990209
0.0794418	0.101494	0.0681455	0.0245855	0.0507205
-0.0114184	-0.0432756	-0.148311	-0.399825	-0.0283969
0.00602687	-0.020553	2.41718	0.456699	0.0727519
-0.0105446	0.00632575	-2.2585	-0.0844299	-0.0937384
-0.0293791	-0.039133	-0.237743	-0.0773508	-0.0548076
-0.0694639	-0.119061	0.0958105	0.0982103	0.00239828
0.0111898	0.730811	0.1656	0.00428662	0.00619749
0.123492	-0.60279	0.11179	0.131018	0.205218
0.0860206	-0.161826	0.0253098	0.0297851	-0.000971386
-0.100543	0.0658043	-0.17967	-0.147146	-0.210022
0.0173626	0.0423275	0.0575791	0.127895	0.111319
-0.0168647	0.062	0.0784685	0.274572	1.64285
0.00364976	-0.0962296	0.0712086	-0.283106	-1.67312
0.00541081	-0.0163224	0.0669226	-0.00819301	-0.0819941
0.0269589	0.0782495	-0.0596927	0.0639039	0.198057
-0.0853026	-0.0310102	-0.204996	-0.11576	-0.119003
-0.0658119	-0.0370274	0.0222231	-0.0333826	-0.0209197
-0.0320363	-0.0575165	-0.194245	0.0161407	-0.0700992
-0.022431	-0.0348066	0.231177	-0.0672725	-0.0148507
0.013019	-0.0343539	-0.375681	-0.0391316	0.00672249
-0.116372	-0.0549043	0.100208	-0.201252	-0.104006
0.133499	0.0495042	0.29253	0.173318	-0.0192114
0.119357	0.199068	0.0397155	-0.0016824	0.039262
-0.0132778	-0.113288	0.111312	0.107255	0.148835
-0.0147166	0.0290612	-0.289048	0.0130864	-0.0316731
0.0407846	0.11807	0.0454362	0.00111174	0.0855199
-0.0110123	-0.0408965	-0.172102	-0.0794165	-0.0842379
-0.0658065	-0.0540732	0.0763202	0.038846	0.00713219
0.0590753	0.0700246	0.317064	0.0428682	0.0860809
0.0364291	0.00243147	0.0786055	0.0658707	0.0156678
-0.0162033	-0.028618	-0.118845	-0.0142084	-0.0393294
0.0108497	0.00569632	0.0454114	-0.165562	-0.0478878
-0.018793	0.00720581	-0.168757	0.109555	0.0630813
-0.0220136	-0.0659975	-0.0394237	-0.120351	-0.151333
-0.00808181	0.0377743	-0.0782835	-0.14281	-0.056439
0.0189314	-0.0498161	0.104719	0.182655	0.145655
-0.00682229	-0.0172742	-0.0130145	0.0992556	-0.0521153
-0.0471987	-0.0845442	0.0543023	0.0972749	-0.0269885
0.000134614	-0.00920128	-0.0894279	-0.089219	0.0658858
-0.00775978	-0.00190358	-0.00656869	2.58824	0.0319291
0.0173831	-0.158249	0.10395	-2.7513	-0.197772
-0.14349	0.104511	-0.0798215	-0.0367319	-0.121472
0.177034	0.102053	1.56938	0.193351	0.261739
0.0334939	0.0677249	-1.30888	0.0471579	0.131767
0.00867485	-0.0897029	-0.171788	-0.0757467	0.0379859
0.0313628	0.0819035	0.0365113	-0.067309	0.0274652
0.0531435	-0.00311888	0.02101	0.0857147	0.0522848
-0.0794745	-0.156434	-0.388477	-0.293161	-0.355616
-0.179052	0.0185446	-0.294432	0.00983589	0.178054
0.104951	0.0589811	0.232532	0.0243556	-0.22051
0.0126894	0.0121615	-0.0244407	0.0296084	0.070451
0.0278252	0.0330717	0.307261	0.169362	0.201625
0.0231601	0.0339279	0.0901731	-0.0198855	-0.0426739
-0.0315923	-0.0434243	0.085962	-0.0382949	0.0139368
0.00189434	0.025693	-0.0372773	-0.118912	0.00179866
-0.0879139	-0.0924929	-0.288782	0.0228665	-0.170988
0.109448	0.140976	0.171444	0.0833913	0.187385
-0.00916658	-0.0649248	-0.130061	-0.0887199	-0.113314
-0.0561454	-0.0507382	-0.0750028	0.00300252	-0.0511758
0.0890551	0.0304284	0.0159908	0.0253371	0.0144602
-0.0725652	0.0142551	-0.276943	-0.092301	-0.120877
-0.00453515	-0.0432795	-0.224676	-0.424984	-0.22739
-0.138431	-0.11342	0.377576	0.318312	0.216042
0.181757	1.29884	0.228542	0.230555	0.179526
0.0108975	-1.0855	-0.00391822	0.0523085	0.0961156
0.00628309	0.00695807	-0.149297	-0.117927	-0.103182
-0.0194412	0.009118	0.0895676	0.0634609	-0.0306671
-0.0105881	0.0580137	-0.134039	-0.101083	-0.0592028
-0.100372	-0.149576	-0.249645	-0.219709	-0.239697
-0.131281	-0.177731	-0.139349	-0.058067	-0.04842
0.0616865	0.0369333	0.333294	0.123803	0.176261
0.0579652	-0.025826	0.222367	0.156393	0.0790612
0.0462612	0.015579	-0.0667906	0.045016	-0.00386062
-0.0630366	-0.0437396	-0.299508	-0.285396	-0.226943
-0.00973784	-0.0365267	0.418215	0.121162	0.0738925
-0.125204	-0.221855	-0.448931	0.119124	-0.107883
0.0389563	0.122459	-0.315267	-0.347587	-0.292867
0.0344499	0.114493	0.0506441	0.0367467	0.0679098
0.0813812	0.0484348	0.51681	0.143005	0.371695
0.0826282	0.0738063	0.0887198	0.0803896	0.0484424
0.0805773	0.118093	0.323967	0.0403235	0.0431738
0.120354	0.0736164	-0.0738672	0.159464	0.30592
-0.113843	-0.115745	-0.298269	-0.0236943	-0.274859
-0.0247917	0.0528623	-0.0166704	0.155454	0.110562
-0.0424194	-0.00449354	-0.0427995	-0.0289006	-0.0541197
0.148822	0.136336	0.330896	0.136291	0.266412
-0.0552689	-0.082229	-0.0107504	-0.0581248	-0.0178084
0.13508	0.12142	0.259958	0.13271	0.179843
0.0666751	0.0632807	0.133019	-0.00146883	0.104221
-0.0531966	-0.0853412	-0.21176	0.00116326	-0.10384
-0.0603445	-0.00380272	-0.343885	-0.122755	-0.212138
0.493731	0.615526	0.52513	0.0677022	0.407734
-0.195495	-0.259667	-0.204396	-0.0295622	-0.183664
-0.0762507	-0.0418357	0.00906148	0.0126733	0.0137056
-0.0268545	-0.0936597	0.0248331	0.0264292	0.0282723
-0.0853702	-0.0741149	-0.0235937	-0.0522447	-0.0771359
-0.0238066	-0.0684231	0.0133696	0.0251196	0.00195844
-0.114456	-0.211739	-0.15907	-0.0744375	-0.139807
0.0471095	1.47343	-0.0393131	-0.0855853	-0.118507
-0.106722	0.845413	0.116478	0.0503222	0.0964567
-0.0507851	-0.787862	-0.0815081	0.0254809	-0.0239899
0.0716276	-1.32919	0.220293	0.0591576	0.104718
0.0471054	-0.107158	-0.18958	-0.0638549	-0.0141343
0.00679304	-0.0360637	-0.0218102	0.0479159	-0.35691
-0.0458899	-0.124718	0.147097	0.0656609	0.178487
0.250485	0.762659	0.0252524	-0.0270746	0.193632
0.563706	0.0593602	-0.0927202	-0.0120814	-0.0851851
0.347037	0.190163	0.0581559	0.165107	0.0993686
0.866836	-0.0720438	0.0870221	-0.0935536	0.119767
-1.83571	-0.411487	-0.119309	-0.0689144	-0.116971
-0.114576	-0.30024	-0.00588858	-0.0751358	-0.0187143
0.275325	0.154391	0.966219	0.029665	0.299505
2.30065	0.975628	3.47033	0.475215	2.62782
1.25704	2.17182	-3.98431	-0.0725223	-0.425763
-0.058667	0.274291	0.362326	-0.157568	-1.63492
-1.41853	-2.04277	-0.302612	-0.00263045	-0.481029
-0.49591	0.0566591	-0.169344	0.0219826	-0.0649279
-0.180198	-0.42876	-0.0435759	-0.216831	0.0201402
-1.35868	-0.801533	-0.602186	-0.172264	-0.574016
-0.195235	-0.272436	0.302018	0.217206	0.286528
-0.0773799	-0.110186	-0.101338	0.0149175	-0.0823891
-0.0114561	-0.000375418	0.103432	0.0526339	0.0429581
0.0970606	0.0626994	0.226734	0.0179992	0.150848
-0.0151124	-0.0117724	-0.193553	-0.065775	-0.0960471
-0.286528	-0.277314	-0.330623	-0.101081	-0.314681
-0.0418824	-0.0162534	-0.0709928	-0.0198235	-0.052044
0.141463	0.204891	0.276686	0.0768373	0.24682
0.0815482	-0.0122817	0.192399	-0.0140999	0.14985
0.060231	0.0348712	0.0734401	0.0655071	0.0348378
0.230122	0.149767	0.0797275	0.0548388	0.150896
0.0267723	0.0888907	-0.158994	0.0144996	-0.0430349
0.244116	0.213574	-0.0546255	0.0344573	-0.0340447
0.068177	0.0965833	-0.0732065	-0.108631	-0.0449582
-0.391476	-0.0937212	0.0191134	0.0335277	-0.0630058
-0.280938	-0.522734	-0.105546	-0.0689783	-0.139706
-0.0106976	-0.0633483	0.061374	-0.0827919	0.00563262
0.0837686	0.0688145	0.118096	0.00681944	0.0560185
-0.0212264	-0.0156363	0.022125	0.0521414	0.00603467
0.0650502	0.00172869	-0.000297051	0.122345	0.0281932
-0.155725	-0.0395582	-0.025393	-0.147027	-0.118676
0.222621	0.238347	0.030169	0.0768661	0.145211
-0.0765126	0.0432342	-0.285115	-0.0596177	-0.134878
-0.141632	-0.149451	0.0126489	-0.0260448	-0.0930138
0.0709521	0.232344	0.0576515	-0.0119557	0.03803
0.095508	-0.199873	0.0650702	0.0313589	0.107301
-0.207717	-0.0889387	-0.2703	-0.0498319	-0.229614
-0.0839602	-0.255698	-0.164848	-0.0365823	-0.236072
0.139886	0.122729	0.451525	-0.0503843	0.331708
0.0761215	0.082168	0.0798776	0.107453	0.126
-0.0245996	-0.0788149	-0.0838147	0.0359883	-0.0345485
0.0232425	-0.009136	-0.0391886	-0.0324105	-0.0136756
0.0298984	0.176265	0.141157	0.0100967	0.0681651
-0.063945	-0.0795982	0.0461522	0.0154353	-0.00889447
0.0102509	0.0312365	-0.0980081	0.00278407	-0.00291097
-0.0587661	-0.0394177	-0.190131	-0.0623124	-0.156523
0.0434011	-0.00221224	0.335194	0.0726277	0.166506
0.019573	0.0794653	-0.120563	-0.0113859	0.000821584
-0.0121494	0.0345207	-0.0183308	0.00317941	-0.00322319
-0.0783787	-0.0578516	-0.1045	-0.0660512	-0.0844204
-0.0381762	-0.031306	-0.107757	-0.0440051	-0.102341
-0.0428248	0.822248	0.0374973	-0.0293885	-0.0254519
0.161256	-0.516514	0.123982	0.0680382	0.160903
0.112162	0.272617	-0.322711	0.0351047	0.0410738
-0.0660847	-0.254561	-0.0444918	-0.0524376	-0.0408793
-0.127439	-0.0934338	0.028436	-0.147183	-0.0548093
0.010552	0.0859357	0.291006	0.0511006	0.0044896
-0.0633421	-0.381597	-0.0904988	-0.0900359	-0.0696736
-0.0100628	0.00819296	0.0241896	-0.0158715	-0.00276456
0.0975971	0.132677	0.215629	0.214612	0.179721
-0.0300048	-0.0873729	0.0205832	0.0499427	0.0158284
0.0162424	0.04439	0.02949	0.0109938	-0.0366314
-0.0645698	-0.116311	-0.11533	-0.0180471	-0.0704507
0.0259652	0.124041	-0.0133981	-0.0514285	0.00713254
0.0368207	-0.0518143	-0.0990593	-0.0531924	-0.0662046
-0.0688567	-0.0591254	-0.10287	-0.0338769	-0.10499
0.092565	0.120637	0.154938	0.114352	0.11775
0.0258293	0.0592824	0.0662901	0.064474	0.0655817
-0.0136346	-0.0541223	0.0278109	-0.00984905	0.0027174
-0.00585428	-0.0111711	9.09363e-05	-0.0251503	0.00901163
-0.00936392	0.0565569	-0.0966083	-0.0315877	-0.0198021
0.044739	0.0425378	0.0680426	-0.0159283	0.0341183
-0.130449	-0.147449	-0.198513	-0.0874991	-0.183753
0.124652	0.141142	0.331185	0.152396	0.2006
-0.0651478	-0.076266	-0.0280655	-0.0138938	0.0101515
0.0168695	-0.0592244	0.0099983	0.0101218	-0.0139298
0.0250097	0.0877905	-0.083663	-0.0115386	0.0113911
0.0592744	0.130106	-0.0190566	0.00328378	0.00740233
0.0429289	0.0447075	-0.0258934	-0.000981319	-0.0193469
-0.120161	-0.110099	-0.00015391	-0.0587299	-0.0832223
-0.032994	0.0179517	0.110135	0.0162205	0.0770335
0.068161	0.040213	0.0650573	0.0534846	0.0891272
-0.0955053	-0.122531	-0.110697	0.00578675	-0.0777167
-0.0228753	-0.00647301	-0.0597381	-0.0579837	-0.0528558
-0.075942	-0.112811	-0.199729	-0.0550955	-0.166709
0.0152639	-0.0342627	0.0841824	0.00453977	-0.0104691
-0.00812669	0.0191277	-0.0630696	0.0493574	0.0158659
0.0403564	0.0470023	0.0269902	0.0258054	0.0499398
-0.00331663	0.00331929	-0.055785	0.277499	-0.00774372
-0.0213833	-0.018667	0.0572286	-0.309568	0.038754
-0.0129447	-0.0471505	-0.0407143	0.00279489	-0.0347854
0.0229747	0.105623	0.0313478	-0.0063159	0.0157776
0.063262	0.0814398	0.0749861	-0.0306495	0.0429794
-0.0475847	-0.079223	-0.0039708	0.0356069	-0.00509681
0.0782612	-0.00473684	0.0908926	0.0325508	0.107288
0.0475004	0.165762	0.103085	0.138613	0.12321
-0.0169233	-0.0330732	-0.0363515	-0.0703042	-0.0452944
0.090234	0.080723	0.0690319	0.170844	0.0822741
-0.0497979	-0.0461194	-0.00274562	0.0329241	0.0015722
-0.0977579	-0.0718707	-0.126091	-0.126132	-0.122464
-0.071579	-0.117558	-0.0893803	0.00278151	-0.11796
0.174955	0.149089	0.188826	0.265059	0.237252
-0.148802	-0.135733	-0.0721702	-0.00857433	0.0460955
0.0571118	0.0306588	-0.231004	0.673432	-0.123396
-0.0345365	0.0265519	0.0355573	-0.540621	0.0384612
0.00110704	-0.012161	0.0446038	-0.365207	-0.11261
0.0410579	-0.028903	0.0725718	0.00450243	0.0429304
0.0173826	0.0704685	0.0680772	-0.020898	-0.00319239
0.109059	0.0146023	0.13071	0.186444	0.171576
-0.0407537	0.0608856	-0.120645	-0.125797	-0.0703811
-0.135828	-0.103043	-0.0971346	-0.0632622	-0.00212709
0.074032	0.126104	-0.0234484	0.129129	-0.0802996
0.00664724	0.212593	0.162098	-0.0235766	0.0817823
-0.108329	-0.201293	-0.25855	-0.0972917	-0.257012
-0.0644738	-0.116543	-0.116389	0.104322	-0.133048
0.0286059	0.0165127	0.144214	-0.155887	0.136903
0.0329015	0.00286891	0.185233	0.0780816	0.111079
0.155381	0.0421576	0.128562	0.423058	0.130103
-0.0108942	-0.00662507	0.069536	-0.110587	0.0681949
0.100035	0.149624	0.101833	0.0134332	0.10987
-0.0143934	-0.0986058	-0.0498531	0.442664	-0.051571
-0.125814	-0.128497	-0.163371	-0.63278	-0.186572
0.0507946	0.10151	0.859655	0.129149	0.944195
-0.0965739	-0.0886308	-0.669648	0.0382973	-0.719896
-0.0958536	-0.132252	-0.182168	-0.22276	-0.216504
-0.0414838	-0.00605841	-0.177664	-0.11927	-0.133257
-0.00176929	-0.0148465	0.0915755	-0.022303	-0.0457844
-0.0437037	-0.0572361	-0.182628	0.0382453	-0.0737957
0.000777418	-0.0249217	-0.105841	-0.0687582	-0.0325546
0.0788211	0.114251	0.417159	0.0741937	0.241645
0.0504758	0.000940327	-0.119036	-0.0757397	-0.0708636
0.177376	0.120373	0.200225	0.167769	0.241041
-0.0835656	0.0373271	-0.196643	-0.104515	-0.216106
-0.0577424	0.060226	-0.106589	-0.118336	-0.0649056
-0.0517542	-0.0802339	-0.0964382	-0.0753685	-0.0880814
-0.10359	-0.157287	-0.0922907	-0.079345	-0.10237
0.042119	0.00428482	0.228704	0.101851	0.0833316
0.144989	0.107512	0.142971	0.243773	0.138739
-0.0426559	-0.0175076	0.0103723	0.0467035	0.0784183
0.0262625	0.0351813	-0.217132	-0.0754924	-0.00779222
-0.0941375	-0.056733	-0.0884212	-0.14616	-0.126907
0.00887982	0.0437935	0.163265	0.0480837	-0.0228207
-0.0888124	-0.0563451	-0.443942	0.154178	-0.237528
0.0375209	0.0148117	0.159949	-0.304336	0.151605
0.0199354	-0.0123015	0.0330666	0.0290423	-0.0295984
0.0816032	0.079203	0.0560501	0.0778961	0.0647451
-0.0413012	-0.0427802	0.1333	-0.0517405	-0.0259438
[truncated: 1,777 more rows]

## Sheet: realized variance
NSW	QLD	SA	TAS	VIC
2.41743	0.418286	8.71279	0.212915	3.9868
0.243109	0.128119	0.329966	0.0875285	0.217348
5.69	11.5067	1.86608	0.141812	2.82002
0.121286	0.0660766	0.480439	5.3482	0.304855
0.0998819	0.0505353	0.208897	119.869	0.167955
0.189931	0.0923452	0.228085	0.188065	0.151608
0.126661	0.0932621	0.177737	0.32891	0.104747
0.1719	0.0833996	8.96046	0.0805169	0.137976
0.446604	0.225807	5.51034	5.65077	0.335653
3.03134	2.55013	2.45726	245.649	2.2906
2.60572	0.797318	1.25534	1.43954	1.396
0.835308	18.5692	0.622378	0.102042	0.641868
0.413284	0.184466	0.330278	0.173068	0.32085
0.225697	0.145693	0.192685	1.54212	0.188293
0.119584	0.0538441	0.220225	65.72	0.10124
0.18548	0.117193	20.3316	10.8465	0.151535
0.18475	0.080831	4.39502	0.480943	0.155518
0.152708	0.0644292	0.453448	0.127893	0.133597
2.16962	0.990282	24.1785	0.345901	16.825
4.26911	1.97264	20.4654	0.314194	16.7693
3.07845	2.75174	16.467	0.438072	7.91854
2.99343	1.40236	5.10173	121.883	3.59367
6.05472	5.62194	21.6644	0.149287	21.8691
0.247219	5.76349	0.169886	0.21859	0.184326
0.311488	0.145997	3.861	2.06988	3.70979
7.33349	2.68393	30.0496	0.264081	30.4846
1.4007	0.656539	1.15886	0.629616	1.14416
0.172774	0.0818362	0.340422	0.180412	0.1379
0.225774	0.14201	0.209026	0.203105	0.180717
1.37578	0.669385	0.429659	0.213064	0.474788
0.318078	0.140392	0.281516	0.181016	0.253334
3.05574	1.25163	1.94548	0.120411	2.04115
51.5843	62.2329	10.157	0.0990888	10.7493
0.347908	0.151272	0.282529	1.99923	0.278346
0.0991311	0.0420344	0.105796	0.0599443	0.104873
0.120341	0.0521545	0.24028	0.127293	0.109996
1.1031	0.572675	1.26243	0.111436	1.29549
0.0593261	0.0299545	0.0716478	29.8571	0.0583187
0.152868	0.0725686	0.243204	0.249435	0.174343
0.229567	0.0989501	0.243031	0.0484797	0.212098
0.0762417	0.0530593	0.144732	0.278145	0.0690899
0.174312	0.0834538	0.210514	0.0905745	0.150308
0.16206	0.0843198	0.136109	0.106731	0.134227
0.216937	2.74326	0.358145	0.110183	0.185008
0.209026	0.0867994	0.308244	1.17202	0.194926
0.230765	0.0903733	0.260979	4.19756	0.20498
0.601009	0.283294	7.06734	6.3161	1.25255
0.882986	0.419481	0.632489	0.138999	0.707313
0.382734	0.204399	0.474522	0.121584	0.306876
0.493844	20.2903	1.00124	0.119741	1.20971
2.26	3.82901	1.72642	0.143766	1.84952
0.920061	0.471215	0.712075	20.5538	0.737137
1.37987	0.708578	0.976651	11.6282	1.0041
2.58732	1.3414	56.0886	1.17738	86.5236
1.93415	0.993596	14.2555	0.0255432	49.452
0.171098	0.0537761	0.203666	0.385727	0.146632
0.140669	0.0843505	0.135736	0.117341	0.137269
0.319463	0.152993	0.235936	0.138359	0.261205
1.09964	0.626147	0.837941	0.080535	0.891844
0.233807	0.10089	0.248723	1.20923	0.212317
0.870137	0.478543	2.06806	7.54647	0.730415
1.20789	0.9789	3.94934	22.5818	4.14177
0.593006	0.340749	0.51014	1.45109	0.504467
0.0827339	0.0598531	0.115902	0.608393	0.0774911
1.14009	0.684601	0.496987	3.97978	0.531989
0.402119	0.242236	0.163237	0.448538	0.164757
0.586932	7.83426	0.437854	2.71488	0.47049
1.22432	0.777783	0.889941	2.35514	0.970451
0.960491	0.617039	0.778936	3.67858	0.760501
0.178101	0.115047	1.79902	0.472522	0.15059
0.232742	0.371066	0.218183	0.520398	0.201808
0.641049	0.381895	0.292942	0.500638	0.465845
0.212667	0.18467	0.179184	0.554645	0.202908
0.349996	0.239039	0.274074	0.288838	0.322857
0.678726	0.64365	0.471485	0.760779	0.495131
0.490395	0.287188	0.462931	0.855518	0.445759
0.104645	0.103648	0.120829	0.792932	0.128898
0.262092	0.184785	0.548788	0.826588	0.576753
0.251498	0.180839	0.205408	0.564804	0.207931
0.30619	0.287092	0.234979	0.441836	0.247306
0.690294	0.687378	26.7246	1.08132	12.9996
0.79766	0.332818	0.658425	1.01667	0.607874
0.309805	0.461819	0.660675	1.42519	0.285161
0.475404	0.433649	8.18073	0.56129	0.425543
0.203034	0.166021	1.14658	0.376075	0.22464
0.223538	3.3186	0.28038	11.4128	0.20533
0.484213	0.449705	0.292781	52.9394	0.395475
1.10179	0.226276	1.10975	311.167	1.00982
0.232719	0.487853	0.238827	0.535381	0.19495
0.195051	0.19708	0.156828	0.506713	0.16592
0.203159	0.147636	0.420295	0.496	0.253103
0.21895	0.156851	0.346726	0.254946	0.21741
0.732845	0.597113	18.8733	3.45722	0.622909
0.234958	26.4761	0.406645	5.99382	0.223992
0.22264	8.42191	0.259234	5.30256	0.215399
0.247267	0.2768	0.83691	1.21177	0.841411
0.225185	0.287074	0.457777	0.175847	0.20988
0.554134	0.331302	0.301805	0.248574	0.485857
0.178277	0.171962	0.367518	85.0013	0.186497
0.231797	0.167795	18.1187	0.345092	18.8342
0.255592	0.708549	0.307983	0.40458	0.238962
0.343184	0.218883	4.39948	0.381738	0.409844
0.250399	0.285253	0.19575	0.188273	0.237316
0.378521	0.119636	0.590885	0.180932	0.352135
0.301386	0.195367	0.638468	0.0591731	0.293021
0.228634	0.198873	0.476829	0.0676273	0.21129
0.171455	0.144546	0.372663	0.243654	0.163413
0.236504	0.226036	0.461033	0.0768725	0.240678
0.245853	0.233214	0.368235	5.23025	0.253033
2.054	2.05544	1.76304	0.167803	1.83431
1.35848	1.37306	1.12015	0.101753	1.13098
2.24	2.20966	1.71282	0.174443	1.89762
0.883815	0.895199	0.781925	0.0665578	0.782248
0.764525	0.762511	0.680411	0.733928	0.673011
0.376595	0.285045	0.424828	1.31615	0.536152
1.30742	1.16161	1.05872	2.36364	1.059
0.858012	0.758484	0.728236	2.23874	0.750148
1.02813	0.998151	0.826277	0.355732	1.25527
0.521801	0.404259	0.455965	3.64256	0.50525
0.415627	0.398634	0.421985	1.41342	0.395027
0.330711	0.304209	0.256121	1.71942	0.320297
0.383339	0.23713	0.589251	6.84712	0.595628
0.513993	0.287933	0.480706	2.21485	0.446923
0.387597	0.310103	0.265999	2.00289	0.350437
0.434632	0.432052	0.379888	7.78368	0.364736
0.254566	0.260823	0.309106	1.82004	0.233445
0.901286	0.959135	1.5457	2.15117	1.23302
1.71685	1.87119	56.7352	4.81979	2.66206
1.62195	1.76095	2.19218	3.06551	1.39063
0.8398	0.951837	4.13099	1.71116	0.685733
0.865141	0.999041	1.02242	13.1625	0.844075
0.306674	0.286203	0.575939	6.7633	0.305896
0.14496	0.125581	0.385903	23.5364	0.141915
0.224119	0.229339	0.475318	10.9434	0.391149
0.8006	0.926097	0.96286	1.3303	0.659646
1.21066	1.35942	1.18037	1.78631	1.24897
0.293067	0.262971	0.544035	0.34539	0.395199
0.276645	1.63292	0.385816	84.8849	0.348825
0.282411	0.286736	0.188814	1.90221	0.459415
0.73041	0.79763	0.578034	7.86321	0.615022
0.532367	0.598974	0.466555	6.16498	0.453586
2.0157	2.13683	1.48693	18.4628	1.48877
1.66016	1.95363	35.0598	83.3516	35.2718
0.80447	0.931834	12.0263	6.75404	1.29531
0.664303	0.786655	0.712708	2.997	1.12678
0.910179	1.05978	0.767221	13.3591	1.15521
0.72671	0.828387	0.603658	2.22111	0.646132
1.45805	1.69844	1.36624	3.93185	1.2392
7.9603	9.42064	6.40054	26.8409	6.33929
2.7068	3.25351	2.3342	7.62588	2.37778
1.22666	1.41299	1.15326	10.7162	1.15291
1.19213	1.43903	1.38669	11.1234	1.5391
0.490683	0.592612	0.367034	10.2599	0.407811
0.498882	0.559803	0.414204	19.9744	0.423687
0.455795	0.529942	0.453084	5.92654	0.392763
1.21861	1.68363	0.829622	54.0131	0.912476
0.657181	0.968035	0.468731	13.5386	0.537127
0.74261	0.874889	0.712855	4.68226	0.623944
0.443583	0.499048	0.340086	14.3886	0.388986
0.279406	0.322006	0.21775	90.1669	0.27924
0.618454	0.727254	0.747862	9.22453	0.806473
0.389787	0.501567	0.422119	3.77573	0.463725
0.738157	0.86614	0.535194	2.21712	0.558295
0.605654	0.661993	0.745815	8.73498	0.689469
1.42585	3.07181	1.42299	10.7958	1.4524
0.821008	1.21821	0.578973	5.69205	0.636896
3.78674	1.81526	0.672609	3.32427	0.743997
0.888401	1.42728	0.676652	8.03456	0.87859
0.617495	1.00014	0.652617	7.85283	0.744436
0.762509	1.17179	0.918112	20.3368	1.11981
0.836081	0.944382	0.610713	55.3962	0.802104
0.79477	0.825808	0.548271	12.17	0.603689
0.722397	0.805437	0.632141	6.38792	0.69673
0.607122	0.598321	0.423394	4.81242	0.465732
0.504241	0.535358	0.415994	10.2623	0.465913
0.42966	0.430592	0.358995	4.49812	0.491149
0.777718	0.938785	0.56911	20.3651	0.624275
1.0332	4.82002	0.659965	4.234	0.936119
0.73719	0.65852	0.582518	16.0155	0.679647
0.940805	1.08064	0.679276	5.20122	0.800328
0.91896	1.17115	0.637722	37.6831	0.742956
1.39992	1.33475	1.06845	7.9569	1.25979
0.767909	3.30848	0.875427	6.24137	2.62407
4.02942	4.83251	4.70055	52.555	3.56206
0.848375	1.36633	1.31191	8.62149	1.39837
0.550299	0.882771	0.535409	4.68037	0.995579
0.929763	1.07443	1.02715	5.7071	1.50099
1.04037	2.17813	0.891432	3.598	2.65737
0.975157	1.69546	0.9173	3.95919	6.91953
1.26236	1.9092	1.01075	4.04408	2.11699
1.75123	2.92016	1.3396	5.72481	1.86602
2.29555	3.4734	1.69754	7.25064	1.92863
2.0961	3.29113	1.70831	5.25448	1.74135
1.798	2.86757	1.2393	5.31536	1.4178
1.75514	2.93281	1.30869	4.08934	1.4491
0.812567	0.869238	0.650281	3.56552	0.681559
0.483142	0.436988	0.412836	1.55504	0.495786
0.630985	0.769809	0.660698	2.11874	0.719767
0.861912	1.03894	0.598183	13.5994	0.654873
9.32461	5.32552	7.64385	21.2767	7.77512
6.70071	10.0064	3.7452	22.0374	5.29234
0.56537	1.22981	0.511157	10.3936	0.607533
0.78396	1.08109	0.562391	3.85984	0.650551
1.52072	2.94521	1.12477	3.78593	1.25677
2.4282	3.37411	5.44995	8.28193	2.08147
0.667695	0.772337	0.506595	4.9317	0.639551
0.725979	0.953689	0.532526	4.38094	0.632773
0.466913	1.65198	0.382532	14.8777	0.485656
0.514546	0.523825	0.442544	3.41372	0.494516
0.458842	0.567084	1.68772	3.60568	0.454185
0.414459	0.368419	6.56989	1.00024	0.34901
1.46414	2.07246	1.9627	11.5062	1.28809
0.684199	0.859878	1.05682	2.13663	1.66669
2.12611	2.2068	1.66835	9.48135	2.23111
0.596859	2.37341	0.497537	3.79801	0.472876
2.20628	4.71017	1.92852	7.48446	2.15212
0.652555	1.7992	3.95766	2.81272	1.01592
0.613931	1.11293	1.90465	2.0335	2.25208
1.86467	1.73098	1.39185	3.72314	1.58789
0.760284	0.642433	0.620668	2.62834	0.746476
0.451229	0.422849	0.371339	5.50275	0.367023
0.723035	0.631994	3.20933	3.15538	0.603294
0.341795	0.311054	0.305732	2.5953	0.414119
0.384409	0.32849	0.274109	2.50478	0.472837
0.383907	0.27743	0.29047	24.9691	0.335449
0.523602	0.463338	0.35604	2.80011	0.455104
0.538967	0.432813	0.345175	2.26556	0.444368
0.597837	0.472316	0.411377	1.88714	0.770898
0.586928	0.462862	0.509529	3.23052	0.541343
0.398106	0.332184	21.1935	59.7472	0.412504
0.613277	0.443898	0.459006	7.99665	0.510668
0.310882	0.259272	0.238243	17.1078	0.289936
0.679856	0.847515	0.548753	3.14755	0.678033
0.695601	3.96067	0.511685	2.91647	0.60518
0.636077	0.606875	0.521466	2.65651	0.61228
2.31212	4.57769	1.60833	4.83792	1.88975
0.93699	0.362834	0.686465	2.88253	0.785765
0.728215	0.999683	0.839295	3.65224	0.842022
0.450562	0.409882	0.351849	10.9888	0.420432
1.10516	1.4204	0.81917	11.1894	0.953375
1.11818	1.06049	0.745228	8.21141	0.942191
0.64202	0.662563	0.425046	2.48528	0.498277
0.771197	0.697415	0.489657	1.86183	0.632057
0.557449	0.449403	0.381583	0.321192	0.478487
0.469973	0.36726	0.390879	1.43074	0.466034
0.594218	0.439311	0.454811	4.44183	0.553265
0.328	0.266823	0.226435	12.0759	0.296707
0.687743	0.672117	0.587045	0.816892	0.66423
0.974318	2.51532	2.36899	2.39033	0.834148
1.98669	4.00975	1.36783	7.02592	1.682
0.842096	0.564967	0.580702	3.52341	0.723604
2.4432	3.40351	1.68334	7.77555	2.06621
0.7391	0.514862	0.538512	1.45393	0.641714
3.74652	5.90667	4.5822	5.12208	3.19138
4.30088	1.81182	2.06626	9.07992	3.18864
1.335	0.897632	0.918177	4.03635	1.12598
0.933181	0.758173	0.623908	12.6089	0.796121
0.90671	0.533167	0.573266	0.333427	0.772141
0.729278	1.57147	0.536577	0.399119	0.64541
0.458611	0.278474	0.352424	0.256298	0.444027
0.719819	0.477423	0.389575	0.0546653	0.55489
0.764004	0.446088	0.726148	1.09581	0.744888
0.641967	0.743981	0.474266	2.24009	0.600172
0.415537	0.393967	0.287767	3.87182	0.396937
0.618083	0.3489	0.467941	3.1399	0.600796
0.689214	0.471206	0.539987	3.57544	0.675246
0.831824	1.23136	0.60654	5.97987	0.798319
0.822806	2.1549	0.919309	2.71553	1.21337
0.655917	0.872099	4.8809	1.48383	6.14725
0.477422	0.40005	0.407642	15.216	0.649407
0.586791	0.929223	0.411184	6.08995	0.548097
0.535741	0.521176	0.36502	5.25639	0.475867
0.402142	0.306116	0.317856	3.0226	0.385731
0.301874	0.208313	7.2967	4.0857	0.308507
0.534209	0.422594	0.417132	9.40762	0.4994
0.633376	0.508049	44.1182	5.70247	0.577318
0.606711	0.523746	23.9754	30.3356	0.607133
0.716992	0.580789	0.695532	3.39866	0.645238
0.483678	0.703116	0.318296	2.44849	0.398313
0.29527	0.241211	0.847311	4.62938	0.27091
0.28952	0.228776	0.244362	4.66278	0.27728
0.706963	0.667577	0.483816	2.25593	0.653419
0.54596	0.843348	0.437947	7.4592	0.690937
0.545712	188.806	0.791852	4.7585	0.985324
1.20425	6.02585	1.16491	2.14976	1.05737
1.60812	202.558	2.03726	1.64646	1.418
2.37182	1.06548	2.0088	11.6474	2.11477
0.65554	0.557098	0.669795	1.1959	0.818733
1.15658	1.21216	0.992654	11.2023	1.05572
0.556935	0.834505	0.518276	0.776462	0.472709
0.901137	1.20732	0.714129	14.1724	0.795989
0.718568	0.771838	0.463742	6.45992	0.587089
0.593192	0.655968	0.485501	1.29019	0.59536
1.36135	0.503741	0.975852	0.330877	1.23049
0.429211	0.362666	0.754441	0.182558	0.961605
1.25303	0.425125	0.965312	0.245995	1.14844
0.604023	0.702978	0.427467	0.667822	0.494095
0.639976	0.626201	0.779507	0.225753	0.907272
0.999895	1.0533	0.662857	0.694443	0.801379
1.31252	1.88967	0.871551	1.2691	1.03283
2.15438	0.866173	1.45675	4.32985	1.6824
0.651646	0.417726	0.505405	1.91064	0.550401
0.587705	0.486267	0.489962	0.320614	0.570186
0.991517	0.719705	0.701674	0.732285	0.797799
4.3323	0.799098	1.75256	0.650711	2.03989
1.17849	1.01921	0.777525	0.763467	0.899423
0.673111	0.503751	0.426212	0.475002	0.531663
0.918952	0.607335	0.571092	0.399464	0.714054
0.912071	0.541988	0.600228	0.681726	0.743263
1.32483	0.660796	0.760842	1.76761	0.987871
1.13853	0.801752	0.660626	0.477554	0.86373
3.27922	3.70552	2.15202	17.4664	2.42849
1.15655	0.804918	0.702602	0.775689	0.856647
1.05056	0.900568	0.66517	0.806134	0.760007
2.57727	1.68579	51.0886	5.7784	2.02454
0.991096	0.555332	5.09317	3.44325	0.826108
1.43979	1.58885	0.92763	0.837362	1.11716
1.24734	15.3086	0.735125	0.835959	0.981254
1.33015	0.912465	0.865434	0.804947	1.02058
1.77485	0.955099	1.48837	1.45657	1.70858
1.03434	0.631302	0.747908	0.811656	0.83854
0.388211	0.225746	0.315785	0.396469	0.337439
0.681692	0.436044	0.502708	0.239363	0.57616
4.40481	2.21511	3.11895	6.1545	3.45324
6.38133	7.9125	2.64268	2.96552	4.86527
4.32058	4.99872	7.92148	20.9317	3.32496
0.881099	0.645902	0.541222	1.07552	0.62926
0.633354	0.393177	0.447896	0.139933	0.510662
2.33112	1.75405	1.63978	1.63327	1.79091
0.646288	0.356163	0.425865	0.523367	0.514221
0.793267	0.668395	0.966372	0.352446	0.635238
2.49166	1.67523	18.6945	9.15808	1.98797
0.703497	15.9836	0.705976	12.4006	0.608306
1.16475	0.681978	7.14804	1.47468	1.25596
1.35381	0.984183	0.914087	3.03647	0.996163
0.762012	0.395793	0.581273	7.75681	0.583013
0.330452	0.203987	0.412845	1.17686e-05	0.281917
0.503027	0.271322	0.529705	3.74238	0.437532
1.04986	0.723706	3.287	3.06674	2.35439
0.401997	0.229418	0.290476	2.56446	0.320814
0.942067	0.534451	0.751689	2.87985	0.824009
1.01709	0.584772	73.5964	5.34634	1.56678
3.05918	0.386286	1.61486	8.45885	2.11081
0.578367	0.40588	1.36836	3.16388	1.41299
0.858327	0.473665	0.898381	2.04143	0.946515
0.375207	0.195244	0.841344	0.899984	0.924397
0.541075	0.277209	0.385272	0.478365	0.398463
1.36402	0.725313	1.04023	5.55162	1.2926
0.484964	25.954	0.369643	3.33574	0.560374
0.295238	0.150911	0.256514	0	0.232209
0.742312	0.37295	0.549837	1.0719	0.540221
0.728776	0.350073	2.65488	2.00758	2.76061
0.554548	0.312928	0.422344	3.37663	0.43816
0.892067	0.427241	2.12769	3.59284	0.676305
1.44461	0.612697	1.30365	1.00833	0.936581
0.795777	0.376417	0.544659	0.614075	0.642959
0.229911	0.122244	0.263495	0.0124077	0.294524
0.284483	0.132118	0.40852	0.719553	0.37643
0.363842	0.166407	0.379504	0.00252236	0.680104
1.77454	0.843987	1.29862	1.26478e-06	1.54025
0.508092	0.245338	0.409535	0.022921	0.503112
0.219691	0.124017	0.192827	1.38708	0.308399
0.331226	0.124935	4.88212	0.163908	0.479075
0.287334	0.159521	33.2766	0.186579	0.490072
0.334135	0.17169	0.604786	0.000837594	0.296178
0.324689	0.154284	0.322475	0.000668339	0.279388
0.877237	0.443103	3.07503	4.24232	2.72504
0.480593	0.321711	2.67624	5.30836	2.82479
0.745607	0.37599	2.18534	4.84097	2.2522
0.770393	0.712208	1.96471	2.69169	1.89857
0.804504	0.503857	0.585126	1.93568	0.617152
0.295168	0.124952	0.327973	5.8956	0.24421
1.05994	0.469055	1.59511	6.97703	0.804155
0.861483	0.676852	1.56965	4.13249	0.675961
2.00251	0.882452	4.03306	8.32674	4.33257
45.9357	24.4188	4.36207	10.5938	15.1397
10.8369	4.85019	1.93501	9.00058	3.59376
0.701493	0.315828	0.425068	0.595443	0.511313
0.934459	0.425832	0.609512	0.485556	0.698277
1.37012	0.557938	5.24346	41.0567	5.5683
23.1198	9.80673	174.255	16.8782	275.649
1.61037	0.657415	1.30783	6.35384	1.3625
1.24606	0.531816	0.88236	4.83542	0.986403
1.351	0.573591	0.99298	80.3735	1.08612
1.12686	1.26423	0.572537	1.36461	0.718
1.27861	0.602671	0.607393	30.66	0.914693
1.30516	0.576425	0.886199	1.53476	0.960759
14.45	6.69017	47.0688	4.81621	10.6231
2.86231	76.1583	3.6517	6.66036	2.01707
1.44308	0.799134	0.964231	7.39484	1.1693
0.966403	0.412362	0.633985	0.625291	0.732826
0.699695	0.463842	0.733988	0.222344	0.625684
0.342535	0.152301	0.366391	0.085933	0.379475
1.72824	17.5177	1.27019	30.0534	1.29519
3.34131	1.7525	6.70029	84.8539	8.81471
1.9868	4.08798	1.33745	1.91625	1.70951
1.09934	0.469146	1.75364	0.309489	0.885853
1.97475	0.89406	4.39104	8.02811	3.68878
3.38648	1.45636	13.2903	68.5724	2.16517
1.56902	0.667243	10.8128	44.7647	1.52504
10.64	4.62665	8.00406	20.615	8.33183
1.9427	0.981962	1.29705	4.05504	1.47778
1.63604	0.734732	1.10515	4.79347	1.26318
2.1257	0.919698	1.39219	1.65544	1.60579
1.78355	0.882488	2.06961	0.971033	2.32007
1.50161	0.529363	1.07965	70.1667	1.22731
0.748474	0.451334	0.49042	0.726012	0.57406
1.55436	0.900226	0.947431	1.68255	1.04112
1.33411	1.43731	1.56949	3.49893	1.10238
1.46618	2.28641	0.945686	2.0877	1.08481
1.50903	2.24746	1.43486	2.85153	2.38107
3.19577	3.97072	2.18382	6.43148	2.53453
8.37261	1.83328	13.1975	63.1498	19.0819
2.84812	0.643959	2.07562	4.5276	2.44655
2.47865	1.53598	2.1278	27.7926	1.90657
5.86963	2.83354	3.81109	119.938	4.97221
1.88839	1.31149	1.24241	25.6288	1.72537
1.72594	0.834387	1.19878	125.754	1.33705
1.94128	0.959379	1.18335	28.7688	1.40095
2.07744	0.971566	56.4577	0.176057	63.0666
0.823054	0.410673	0.763768	0.203337	0.737649
1.65361	0.829602	0.808378	0.330737	0.951595
1.94021	0.965884	1.31846	18.4847	1.58192
1.23221	0.625062	3.59126	22.6655	1.29025
1.37775	0.762173	0.833073	6.15801	0.979676
1.35232	0.711216	0.9171	7.50344	1.02715
10.3304	1.36709	1.63219	34.8688	9.22175
2.139	1.29709	1.7418	89.1839	2.59109
1.33427	0.718109	0.901149	1.13484	1.05206
1.44811	0.757932	0.972882	1.15732	1.14721
1.38182	0.748391	0.92451	76.4898	1.1152
1.47932	0.918297	1.0085	5.63808	1.18737
1.03304	0.594639	0.70627	0.341222	0.82606
0.982926	0.546156	0.905811	0.63068	0.998306
1.08403	0.607744	0.591919	0.299851	0.764338
1.73418	25.2365	0.617302	0.363116	0.888847
1.51172	0.909256	0.963654	0.318949	1.19279
1.48253	0.845476	0.945653	0.978721	1.10094
2.13834	1.26642	139.326	213.584	154.693
1.18542	0.724776	1.66538	35.6769	1.93188
1.48437	0.911114	0.596211	2.10266	0.894609
0.822144	0.492259	0.561691	0.638048	0.669682
0.794051	0.499756	0.553732	1.01595	0.636244
1.73366	1.48721	0.742027	1.03096	0.889303
2.32653	1.69442	1.44555	38.4489	1.10542
5.50558	4.22691	3.87367	3.98258	4.01243
5.32151	3.05943	3.71373	32.475	4.3377
1.55443	1.01397	0.876841	0.142137	1.79654
1.21358	0.792499	0.810728	0.209803	1.11334
0.87363	0.620121	0.8504	0.451282	1.00041
1.16026	0.76352	0.868976	2.69728	0.97362
0.977107	0.709701	0.655502	0.842803	0.777562
0.721903	0.55321	0.423681	2.35258	0.555591
0.942664	0.713984	0.604188	2.4645	0.74536
0.891912	0.65778	0.598772	1.44301	0.710826
1.90812	1.40071	1.35251	31.7863	1.56012
2.60564	1.94806	1.87857	6.43384	2.07603
2.79734	2.13141	2.89114	16.1704	2.3689
4.38404	3.33555	4.11308	7.62572	3.54535
5.75898	4.40777	4.3071	32.9852	4.33623
2.96281	2.22704	2.17447	1.51506	2.47102
1.32502	0.998808	0.955217	0.313933	1.08796
0.908765	0.734551	0.655049	1.61771	0.750099
1.60279	1.26889	1.13593	39.7555	1.30467
1.78155	1.44462	1.32632	2.69375	1.46261
2.77038	2.32306	1.90379	1.54492	2.97056
2.12092	1.86068	1.30218	5.46168	3.1944
3.97114	3.39907	2.92224	5.47578	3.78405
4.77285	3.97101	2.72459	1.49434	3.09889
3.50308	2.99114	2.6931	1.48555	2.89268
6.40584	5.55245	3.66275	53.3443	4.06028
4.53574	3.94351	3.46053	75.9448	3.89656
4.18331	3.78286	2.88963	36.0061	3.24649
25.106	22.1219	4.96744	41.1439	5.60996
4.26419	3.82672	2.65631	13.1965	3.12443
3.15644	2.92043	2.22255	3.87642	2.49109
1.53703	1.41894	1.07423	2.99069	1.20451
3.28966	3.08158	2.01972	2.3342	2.27279
3.15762	2.98816	2.04929	5.38052	2.41192
1.46443	1.42225	1.1034	1.31291	1.19331
4.35654	5.23321	3.16512	40.9189	3.38768
2.6242	2.45186	1.61829	42.5983	2.11298
1.65425	1.56373	1.21551	23.7532	1.33414
3.03033	2.875	2.26089	7.02583	2.50912
1.58642	1.58662	1.11923	3.61581	1.21923
2.12322	2.11043	1.56047	40.7286	1.69805
3.46063	3.4633	2.55092	73.5241	2.77496
5.30281	5.20863	3.9914	2.44713	4.23694
4.54743	4.49222	2.66153	37.8211	3.58976
4.10698	4.02711	3.141	35.9372	3.42553
2.29386	2.27148	1.74704	3.96514	1.93316
2.59829	2.61986	2.78163	2.00186	2.11198
4.0332	3.98777	5.12231	5.76943	3.37685
3.05182	3.09807	2.34306	76.7808	4.09147
4.68459	4.35043	2.87122	68.5841	3.64661
2.74946	2.79778	3.10718	6.53176	2.20909
5.62611	5.6892	5.108	70.9174	4.62712
3.52888	3.52211	2.91105	2.16277	2.93919
1.32026	1.45351	0.724575	2.34185	1.04048
1.2933	1.4544	0.833947	1.28181	1.13101
1.27199	1.35599	1.45069	63.4813	12.6708
0.981281	1.11077	1.38998	1.68075	1.30531
1.54264	1.70314	1.21621	1.11297	1.2762
1.07036	1.09718	0.822748	34.1689	0.905068
1.09699	1.1331	0.888719	39.5056	0.902291
2.10398	2.30337	1.6842	2.66129	1.72808
2.55706	2.83041	2.01145	3.39382	2.15264
1.93412	2.08619	2.39853	34.8389	1.59066
2.04998	2.14101	2.00765	30.4766	1.64541
1.86199	1.92158	1.37422	58.8167	1.46525
1.508	1.60318	1.06663	57.971	1.22996
1.15376	1.19201	0.921125	30.4984	0.981242
1.37644	1.66719	0.967294	2.29171	1.05115
1.28994	1.60894	0.928419	29.498	1.03569
2.93777	3.20265	1.94548	8.8743	2.21731
4.00503	4.153	2.69755	42.7968	2.78102
3.25025	3.3812	1.29722	30.9016	2.63552
1.88571	2.02503	1.03112	68.7155	1.46573
1.24785	1.32737	0.914428	64.4719	1.03409
1.97777	2.12317	1.46088	4.88745	1.53138
2.06357	2.1939	1.52408	5.1633	1.61327
1.15297	1.274	0.897757	121.25	0.894297
2.51665	2.65335	2.37759	103.035	2.06577
2.63417	2.82512	2.88958	13.2559	2.29381
1.8023	1.90734	4.62826	92.8978	1.50209
1.08159	1.12463	1.07626	55.6609	0.773892
2.80269	2.7741	1.94147	90.9734	1.91303
9.00691	10.129	5.07929	50.7019	6.71755
10.2081	16.1794	13.7885	226.46	7.98417
9.43225	162.12	17.2551	126.847	20.868
29.2423	14.0903	6.37281	92.9456	94.7487
11.3193	12.4341	7.69475	71.1062	10.6822
4.06954	4.12814	2.2898	5.7847	2.52248
12.5148	12.5715	9.23311	56.6408	10.0792
13.3262	13.9877	8.88627	53.1713	9.40703
16.2582	15.9093	16.2261	78.7307	17.5194
7.73164	7.56565	5.08301	35.9699	5.1618
7.49107	17.1653	3.12076	13.4481	3.53522
2.92788	5.90217	2.40292	82.2176	2.34747
3.25913	8.1031	2.32706	6.75183	2.61207
4.8132	9.25918	3.49781	45.1052	3.87472
8.10619	7.91812	2.48367	120.643	5.64895
18.6606	16.8775	46.6563	127.307	72.8935
16.7055	15.887	13.3349	65.011	21.1364
6.25896	5.81032	4.43415	105.482	4.93725
2.627	2.94841	2.07373	10.1034	2.5782
2.46976	3.36859	3.3543	2.91684	4.39397
1.67759	1.6162	1.76504	1.60834	2.16043
2.01819	2.20403	2.15119	4.31989	2.25104
1.10715	1.81646	1.68318	3.99778	1.53221
1.67844	1.79408	1.59647	2.03203	1.97315
1.64199	1.69775	1.55763	1.76709	1.75899
1.59983	1.61305	2.00642	1.90596	2.25965
1.98956	2.1284	1.4078	3.38904	1.59191
11.7244	11.7086	6.62134	19.7237	5.735
1.82308	3.06972	1.09069	55.2293	1.25452
1.28817	1.19102	1.03489	2.50068	1.46483
1.533	1.57837	1.70292	2.56592	2.3575
1.23583	1.15674	1.93122	5.02313	2.78411
1.47013	1.29975	1.55837	3.59116	2.09041
1.92525	1.64406	1.99278	2.66797	2.76471
2.01204	1.79387	1.62808	3.19191	1.91653
5.97595	8.96567	4.56111	12.0462	4.78414
4.74375	5.44213	3.95898	12.2502	4.99315
1.77812	2.07461	1.50255	5.05073	1.99474
1.36104	1.74327	0.917254	2.99519	1.08479
1.47887	1.2542	1.11627	2.15375	1.4134
1.41329	1.21105	1.68097	4.5014	2.32986
1.94457	1.69581	2.55385	11.382	3.90074
1.11316	0.965385	0.807311	8.42814	1.01897
0.96027	0.829502	0.787675	4.5669	0.794726
0.826143	0.722913	0.600734	4.42336	0.806366
1.07845	0.938552	0.911758	1.44631	1.06499
0.798719	0.680249	0.760128	2.93307	0.913637
0.885725	0.736454	0.634619	3.29238	0.801763
1.11367	0.889507	0.895056	3.47737	1.23843
1.31709	1.09163	0.91856	5.1627	1.21336
0.855943	0.757624	0.590082	4.89769	0.773146
0.874971	0.922247	0.59098	1.32683	0.708863
0.846399	0.820351	0.64098	3.06908	0.753949
1.21222	0.972393	1.06937	3.88985	1.44938
0.723537	0.737539	0.648899	8.63005	0.741126
1.16377	1.4969	0.886013	5.39122	1.28541
0.846521	0.701318	0.694999	102.183	0.756855
0.966511	0.922604	0.699396	53.2273	0.978775
1.15015	0.996618	2.50751	97.4478	1.23737
1.37469	1.11872	61.7717	114.813	1.86589
1.74586	1.42415	0.736756	18.6745	1.04617
1.30925	1.01299	0.821147	67.628	0.987977
1.15283	0.988097	0.812803	215.502	1.01796
0.871078	0.94236	0.569808	200.905	0.835123
0.949505	1.26058	0.68392	53.5667	0.893665
0.998125	0.924857	0.749912	75.3893	0.863503
1.0862	0.895996	0.670196	129.956	0.879482
0.98557	0.803649	2.35153	154.368	0.838117
1.71274	1.31902	1.38139	90.005	2.30432
1.72978	1.48663	1.05459	140.504	1.4117
1.02275	1.27302	0.602611	35.9552	0.840166
0.827972	0.70595	0.514337	3.52783	0.699997
0.786492	0.670782	0.533282	32.7944	0.713565
0.832255	0.75124	0.605672	59.1703	0.774479
0.846152	0.671399	0.57679	8.0336	0.830283
0.634737	0.510481	0.498042	17.227	0.644499
0.48998	0.472025	0.334458	1.76676	0.459534
1.00948	1.11169	0.702788	40.8767	0.905007
0.448373	0.438505	0.332158	25.8976	0.459485
1.29478	1.12695	0.830859	88.5491	1.12139
0.866727	0.6969	1.04276	44.7252	0.92842
0.698412	1.01537	0.397338	1.96221	0.571698
0.495606	0.406617	0.458021	1.25232	0.531172
1.87577	1.46162	1.73741	55.2402	1.53913
2.12415	1.69973	1.81225	176.188	35.9615
3.12827	2.42774	2.00498	73.535	72.5604
1.05051	0.838997	0.555648	30.1119	2.12996
1.21717	22.1848	0.883937	27.3074	0.928252
0.954726	0.79221	0.452991	31.3691	0.767191
1.37517	1.07897	0.786569	32.5765	1.06742
0.863781	0.713107	0.550644	44.4389	0.60362
0.735552	0.608994	0.620052	129.888	0.596647
0.93443	0.832679	0.59945	0.360112	0.74769
2.04274	3.59715	1.19033	26.6757	1.30571
1.55521	3.84515	1.00277	30.9825	1.25472
1.17297	1.46586	0.716503	1.69452	0.953158
1.51185	6.53858	0.896909	32.3791	1.24687
1.15811	6.77445	0.679234	55.2654	0.919281
1.83562	3.52878	1.11825	0.688374	1.49183
0.856368	0.695091	1.08484	0.583811	1.51226
2.83444	6.46364	1.79842	114.559	2.0041
1.73115	1.40326	0.914825	0.673674	1.37889
3.66411	3.251	2.36817	29.7573	3.74145
2.87973	2.30297	1.79919	33.8338	2.1772
3.11498	31.4178	1.3208	158.188	1.84388
2.44262	2.19656	2.28765	218.129	3.52694
1.2305	3.18162	1.77236	31.24	2.50943
1.27187	4.03764	0.672173	1.54758	1.04211
1.58737	5.75848	0.865774	1.0756	1.25019
1.68872	1.32218	1.00548	2.16031	1.56607
2.33459	1.73823	1.36676	108.225	1.99032
4.9203	3.85966	2.99992	17.4478	3.82071
2.19177	1.44216	1.26794	94.9881	1.76777
3.70787	2.90842	2.08416	86.7033	2.87568
1.83	2.22369	1.07484	58.7876	1.42726
1.98544	13.8983	0.851188	68.3847	1.71422
1.7646	47.7145	2.20923	56.8157	2.97298
1.24558	27.4424	0.724545	52.0829	1.09273
2.77564	93.2618	1.58457	45.0151	2.26139
5.20776	28.0229	2.23432	18.4693	4.05916
1.7441	33.3252	0.938131	47.1257	1.41422
3.64398	35.9346	2.14982	179.123	2.89464
2.03603	5.35998	1.35417	75.5607	1.74757
0.760244	0.606994	0.647836	26.6164	1.04517
1.12264	0.909022	0.712141	23.4303	0.914207
6.22918	4.69092	1.20647	7.43271	2.98055
3.03625	2.3338	2.51754	22.0837	3.01471
2.35034	1.77392	1.62499	88.5306	1.90616
1.65067	1.27207	0.959037	20.4486	1.57399
5.30868	4.05134	3.32395	8.20993	4.85975
1.00166	0.768922	0.632898	1.48226	0.797972
2.57039	1.77927	1.57624	18.521	2.03105
24.9215	9.06468	8.49865	47.9593	10.7525
4.40287	15.3942	2.40244	46.1055	3.31857
3.81791	71.5026	2.40081	56.181	2.90774
3.55928	6.52695	1.82363	30.2248	2.45435
3.86596	34.7205	2.43166	37.5778	3.24431
1.74743	5.0989	1.36211	52.7655	2.08162
2.29195	4.46491	1.43335	44.1012	1.83595
1.42808	30.9514	0.939532	54.3066	1.13249
1.76249	8.80912	1.11997	56.187	1.3948
1.47892	8.31655	0.888504	100.35	1.11815
1.39174	4.45676	0.810652	53.747	1.08948
0.817963	9.19718	0.822737	1.44337	1.26272
1.40018	1.47885	5.2706	4.66714	1.10045
2.06572	217.649	1.49109	1.69832	1.7952
1.16133	1.49402	0.829162	23.0981	0.960737
1.00004	0.757999	0.594646	0.377958	0.854209
2.36885	1.69699	2.18447	18.2799	2.56172
1.19889	0.851351	0.73476	0.312866	0.921341
1.64255	1.13597	1.0786	0.450613	1.29887
1.70672	1.16017	1.06303	1.01754	1.32304
1.59514	1.49997	1.01001	0.0013783	1.23318
1.27682	0.836687	0.832303	1.48402	0.985721
1.2739	0.742225	3.18329	26.8512	1.16028
1.11415	1.11594	0.909398	14.151	2.7941
1.66041	1.14581	1.352	57.4942	1.90125
1.33291	0.966555	31.3646	43.488	37.0133
1.24386	0.804098	49.3635	34.2624	89.9206
1.12604	0.739755	2.19129	52.5533	3.1145
3.62144	6.98372	2.31379	85.2124	2.76353
0.94712	0.657798	4.76411	24.0724	1.52762
1.96523	4.38077	1.12752	27.6644	1.60758
2.58571	27.2757	1.6948	0.485527	2.28382
1.78554	1.11892	0.954546	26.5873	1.35117
1.35844	0.867846	0.877258	0.262327	1.37939
0.564292	0.337946	0.418049	0.0891364	0.577156
1.53014	0.931737	0.949874	0.414718	1.14969
0.875388	0.550053	0.511288	25.7255	0.705849
1.92123	1.00784	1.10453	1.49395	1.41889
1.65895	1.82894	1.01607	1.83162	1.27811
1.40769	34.9665	0.847088	0.220329	1.01484
1.48475	1.31801	1.79923	1.45877	2.17522
0.851083	6.2779	0.7347	1.28207	0.92561
0.78645	0.47024	1.03239	29.3228	1.34293
1.00949	0.684734	1.73437	1.76837	2.09446
1.07791	1.01413	0.724592	28.6394	1.21216
21.6943	15.1823	8.04687	132.931	16.9601
1.21622	21.0328	2.19256	108.347	1.26547
0.881205	3.3561	0.652218	0.349188	1.00605
0.641612	0.861787	0.500966	2.21506	0.4695
0.760184	23.7401	0.755819	62.6636	1.08725
0.545191	22.4012	0.448781	26.5948	0.654807
0.57217	1.66456	0.387779	0.750195	0.437311
0.851659	0.428199	0.664479	0.514847	0.886964
0.863618	0.42803	0.573022	72.0794	0.767612
0.35205	0.164842	0.29638	1.25948	0.453298
0.244925	0.154146	0.198583	0.125274	0.239395
1.01046	0.68884	0.839897	45.0048	0.974922
0.408087	0.198493	0.805618	1.089	1.56404
0.718052	0.372453	0.991404	31.1655	1.53378
1.75253	0.863152	2.16435	10.8009	3.05592
0.718577	0.346554	0.592789	2.29619	0.813311
0.630054	0.289804	0.410379	2.38277	0.494649
0.367153	0.171264	0.268758	0.535244	0.274794
0.453568	0.199301	0.357413	11.567	0.366515
0.670986	0.319107	0.450216	28.4209	0.476199
0.838392	0.384493	0.575077	0.207819	0.621315
0.524568	0.230322	0.319221	2.22478	0.407279
1.23209	2.10071	0.778092	5.50919	0.875725
3.67095	3.16537	2.25551	3.26693	2.59096
0.601568	0.260146	15.632	5.94519	2.57785
23.5354	10.3529	26.3825	6.28451	58.4504
1.31683	0.694432	25.6332	0.998167	3.53899
0.900117	0.432489	0.739357	0.518603	0.638245
1.90821	0.994793	1.42827	0.635042	1.38156
1.61536	0.679767	11.6461	1.83911	10.0858
1.07371	0.457732	1.13282	26.1461	1.29558
0.878237	0.399982	0.570327	15.8853	0.660501
0.834809	13.6173	0.536322	4.38071	0.608533
0.631138	1.50478	0.422817	3.25475	0.478218
0.472318	0.186319	0.308862	2.36092	0.415951
4.28807	2.10668	13.7527	1.86798	12.4396
0.563996	0.290293	2.21259	4.41216	3.5014
0.461689	0.170183	0.32344	3.15446	0.365543
0.668358	0.282742	0.509241	2.12562	0.679676
0.5715	0.227599	1.6528	1.15559	2.66508
0.750751	0.476607	0.493644	1.71854	0.565008
0.54613	0.209227	1.7906	7.22784	2.96664
0.44944	0.16332	0.546307	4.77795	0.724773
0.817055	0.308244	1.16722	3.96621	0.660553
0.6831	0.272537	0.476597	1.74331	0.5187
1.76558	0.714931	1.20795	3.88186	1.28629
1.44938	2.9291	0.903833	3.19243	1.03667
0.907303	0.320662	0.614263	2.07341	0.696027
0.90272	0.334162	0.626596	1.1949	0.703372
0.735247	0.270901	0.496853	1.19119	0.569735
0.701632	0.276374	0.550501	1.23472	0.694984
0.583093	0.21291	8.2922	8.30241	10.7157
1.0691	0.414563	0.755419	6.15932	0.825351
1.06995	0.425235	0.7483	1.41559	0.818936
0.748447	0.377032	0.487053	1.33888	0.564041
1.69402	26.859	4.1103	9.00466	4.97708
0.588489	8.2829	0.401519	2.52121	0.444834
0.995329	0.380272	0.647882	1.85197	0.751504
0.795551	0.269265	0.551065	1.44909	0.577751
1.14671	0.433838	1.11416	2.41925	1.10923
1.2852	16.1545	17.5793	9.12513	19.9178
0.548259	0.721366	0.391176	3.24171	0.453357
0.851766	0.571889	0.5781	1.30791	0.678981
1.06581	20.0847	0.776436	2.31467	0.852512
0.613922	12.1664	0.428749	4.06185	0.496735
1.3592	0.528027	0.927185	7.93826	1.03503
0.954406	0.382288	0.674587	2.45673	0.7564
0.782711	0.306753	0.689652	0.670245	0.808381
0.54351	0.19049	0.402561	1.12222	0.453873
1.00607	0.769512	0.715839	0.882791	0.793641
1.0147	0.389491	0.789226	3.51282	0.896045
1.38263	0.537136	20.5296	27.9054	23.3467
2.54203	0.983939	7.35776	15.6017	31.2963
0.917417	0.372537	0.815059	2.94243	0.954626
5.83985	2.26597	17.6464	13.0179	38.5064
1.87534	0.735771	30.9783	12.8754	5.55654
0.681981	9.82592	0.468799	1.51366	0.535541
0.761878	17.1874	0.491789	2.88769	0.570795
0.573311	66.8816	0.389928	2.50059	0.506151
1.0307	42.3555	1.43919	1.92743	1.8244
1.27407	0.559837	0.872734	5.62837	0.983301
1.11747	0.490359	0.775151	3.23524	0.874181
1.00074	0.441252	0.655603	2.23739	0.768965
0.805456	0.355635	0.553183	1.19774	0.650971
1.59781	8.11398	1.06372	1.6504	1.2493
1.06794	0.489415	0.744426	1.2097	0.869707
1.16339	0.52375	0.825184	2.14218	0.943036
1.19711	0.557844	0.853876	1.33722	0.97839
0.934625	0.594792	1.12114	1.32587	1.35095
1.9794	10.8863	2.13619	2.17832	2.62607
1.57742	2.6146	40.9366	1.47686	1.43202
1.59679	1.42272	16.6409	8.67331	1.2495
2.5525	1.10196	15.3506	2.61654	2.03619
2.59336	1.24462	1.69294	1.30463	2.17259
1.59873	0.782998	1.09155	3.48292	1.46221
2.0096	1.01971	5.11889	33.0737	2.93081
1.52024	0.759047	5.31046	2.507	1.13805
1.34112	0.619386	17.1879	1.63007	1.13017
1.84541	0.970718	17.8724	2.61693	2.18335
5.85421	3.03032	2.74427	6.06774	3.20478
1.08897	2.18387	0.817111	8.0907	0.958199
2.62167	1.39989	3.42793	4.68544	4.03664
21.426	11.1947	27.7841	2.17403	34.0619
1.34436	0.61912	1.09403	2.63878	1.67245
1.09322	0.617546	0.674436	2.75114	0.847708
0.615557	0.355218	0.452822	0.481244	0.639842
0.461556	12.0213	0.362752	0.468431	0.405145
0.469926	1.2148	0.357548	0.273393	0.411797
1.31008	0.765927	0.973726	0.375951	1.09639
1.07658	4.14607	0.854851	2.10851	0.952721
2.89164	1.80492	2.05925	7.94949	2.38244
0.634834	6.3453	0.872893	3.44383	1.09805
1.11739	29.2128	2.08675	5.47592	2.52886
0.582228	0.819351	0.611808	4.01769	0.804903
1.01409	1.98731	1.55789	6.22784	1.89868
1.24203	1.0242	1.1753	2.58103	1.51465
0.941902	5.92326	6.13917	5.61868	7.1658
1.60603	21.2735	1.42149	2.76168	1.68361
1.10246	0.693673	0.491735	3.57328	1.32845
1.09214	0.697663	1.20377	2.55523	1.52009
0.724999	0.489703	2.57258	7.48344	3.04161
0.349446	0.240907	0.228568	7.03226	0.507353
0.309149	0.229668	0.243333	3.7537	0.354424
2.65285	1.94595	2.69018	2.03913	3.20135
1.13717	9.37503	0.95877	2.15148	1.17841
0.761588	0.573881	2.28221	4.38224	2.65091
1.21188	2.2145	1.99543	1.54683	2.43549
0.779382	0.598676	0.449065	1.02557	0.605733
0.565439	0.411722	0.373329	1.43635	0.486834
0.635514	0.484311	0.41715	1.18279	0.532146
1.34843	1.03846	0.862989	1.67455	1.02429
1.24861	0.991967	1.08292	1.27728	1.33226
1.02873	0.810952	0.732953	1.35408	0.9285
1.07465	1.08653	0.598478	2.39652	0.76573
1.08529	2.83016	0.708188	1.49595	0.865353
0.61632	7.89505	0.985855	1.51145	1.08741
0.760992	0.594091	0.513149	3.89131	0.628977
1.14333	1.21241	1.11533	1.49807	1.37784
0.995716	1.15128	0.589427	2.64795	0.7552
0.621409	0.729879	0.400202	1.90453	0.516836
0.628147	0.600928	0.331634	1.19639	0.510893
1.41503	0.815983	1.01459	7.79019	1.23748
1.01021	0.635699	1.749	47.5518	2.01049
0.85818	0.73398	0.934278	3.77864	1.10722
1.45123	1.57431	0.936678	67.7613	1.12626
1.07757	1.24783	0.985435	68.1511	1.14256
1.45656	1.82837	1.28532	1.34069	1.43173
2.06097	2.3569	1.59467	1.93066	1.98093
2.01125	1.77839	1.62014	89.4395	2.09532
0.67335	0.627306	0.446928	4.25708	0.693398
0.756277	0.680342	0.717826	28.3251	0.880492
1.04346	0.851243	2.55016	3.71796	3.03545
0.968285	0.89937	0.88705	29.261	1.176
1.18408	1.08522	1.68872	3.51489	2.17167
1.38048	2.04143	0.864903	13.7605	0.984799
1.71387	1.25136	1.28332	33.4205	1.65524
1.8639	1.63433	1.22702	3.40788	1.50988
1.338	1.19066	1.36054	29.2503	1.7908
2.32237	2.09606	1.51079	51.4251	1.88196
3.96017	5.27171	3.11374	175.025	3.6329
2.2834	3.41899	1.56354	36.2998	1.98778
1.00472	0.928377	0.378992	51.7386	0.973331
2.16527	2.45112	1.17244	5.76213	1.45786
1.55898	1.68262	2.53039	139.305	2.96685
0.887183	0.818789	1.71558	5.31649	2.64449
1.13159	1.03574	2.08993	38.2492	3.53615
1.01091	1.20808	0.693713	7.91538	0.951364
1.02865	1.01229	0.656303	2.13819	0.841975
1.25058	1.23227	0.585615	6.27495	0.939345
1.35628	1.33033	0.728958	1.45047	1.02316
1.03656	1.26052	0.493012	5.02074	0.779534
0.98902	0.934727	0.675009	5.64436	0.784386
0.596835	0.553734	0.422772	28.4941	0.580613
1.41743	1.35163	0.741323	2.21422	1.07418
1.80276	1.95314	1.14541	1.97101	1.32677
1.37458	1.51769	0.650791	1.61499	1.05736
1.41886	1.2827	0.622745	1.58727	1.11493
0.602978	0.830201	0.415127	1.50691	0.537485
0.887516	0.735617	0.813818	3.58026	1.095
1.09742	0.935178	0.537891	2.47282	0.909952
0.844741	1.00864	0.498745	2.27599	0.66486
1.34778	1.44211	1.00576	1.73168	1.19031
1.31809	1.32464	0.6983	1.54289	1.01171
1.14029	1.18203	0.504772	2.1738	0.893689
0.704388	0.786136	0.416043	1.61733	0.561173
0.779689	0.683278	0.569825	4.41109	1.19076
0.907722	0.828968	0.695044	14.067	0.765952
0.790037	0.654897	0.44493	75.009	0.573694
0.926435	0.843372	0.667872	1.52736	0.80688
1.03003	0.935693	0.83861	2.97552	0.905338
1.32078	1.20798	0.852318	1.41345	1.04136
0.792132	0.741211	0.506975	1.61194	0.630782
1.07202	0.976472	0.69878	3.07822	0.834606
0.712328	0.653732	0.458275	1.91842	0.561301
0.703085	0.639897	0.401258	1.02527	0.573526
0.622632	0.568522	0.437383	0.674583	0.733011
0.84587	0.787249	0.571502	0.790806	0.771297
1.03322	0.894364	0.617854	3.65925	0.811285
1.01333	0.88861	0.784528	1.14613	0.844833
0.796338	24.5093	0.594852	1.75449	0.849729
1.60289	25.2936	1.08524	3.0806	1.22822
0.939423	20.7348	0.517199	2.5633	0.685869
0.615503	0.510107	0.364708	4.568	0.469412
0.841762	0.717652	0.495448	13.1474	0.657133
1.07591	0.893578	0.630988	16.1378	0.828002
1.14886	0.947613	0.673639	29.3167	0.918579
3.14008	4.30873	2.07751	254.984	2.43297
1.4789	1.25195	0.943359	168.632	1.08474
1.16881	0.879034	0.713565	118.602	0.925605
0.625659	0.495531	0.384199	95.546	0.532091
0.900171	0.718079	0.57176	229.225	0.706708
0.627431	0.549378	0.388133	20.2757	0.560986
0.938911	0.764851	0.641377	4.95724	0.779511
1.06465	0.813576	0.721611	3.69553	0.847694
1.40807	1.03265	0.697268	196.052	1.03692
20.9066	17.0789	13.2977	110.618	16.1396
0.95529	0.669895	0.5311	28.9438	0.75578
0.810955	0.64826	0.558567	5.62389	0.623536
0.83701	0.620634	0.45342	0.000789029	0.561461
0.909592	0.764482	0.72034	0.000140136	1.01848
1.44704	1.1452	0.933669	0.816566	1.16936
1.58718	1.24562	0.999026	0.000887037	1.19252
0.933717	0.790584	0.54848	0.000280563	0.792405
1.11683	4.21538	0.637491	0.815964	0.86721
1.08077	1.05944	0.62822	7.98985	0.85675
1.2387	1.32596	1.01389	9.73384	1.32816
1.32308	4.58193	0.866083	3.4773	1.1594
1.14574	0.82394	1.04986	9.8335	1.5019
1.08772	0.811874	0.728075	206.592	0.912813
1.31272	0.944027	0.633521	117.099	0.876098
17.4456	13.351	11.3497	140.596	13.8391
1.00333	0.750556	0.540228	2.16593	0.758358
1.19697	1.22758	0.626769	2.55114	0.818506
0.959461	1.10208	0.564419	1.00802	0.838967
1.53631	1.50154	0.607327	1.86671	0.782825
1.16604	1.20811	0.635635	33.5164	0.864908
0.830282	0.579956	0.413542	1.377	0.612397
1.18613	0.76028	0.677749	9.4967	1.04855
1.1781	0.90645	0.811955	3.3563	1.15324
0.995987	0.534103	0.644677	1.08724	0.742646
1.02081	0.963244	0.602292	1.72002	0.91165
1.09647	0.780946	0.687413	1.87575	0.906466
1.03596	0.729121	0.54299	3.22413	0.828368
1.02165	0.58984	0.509226	0.561285	0.646812
0.700928	0.940392	0.324585	28.0145	0.569613
1.04898	0.72473	0.641033	1.52644	0.938978
1.25623	0.861104	0.677746	2.20123	1.00737
0.765654	0.556502	0.457569	1.36885	0.611431
1.16519	0.887452	0.755642	2.83484	0.930567
1.94187	1.20773	0.923457	38.6069	1.2201
1.38585	0.968169	0.805676	59.8595	1.38649
1.03011	0.689298	0.528739	24.2264	0.785098
1.22894	0.852197	2.10024	76.8418	0.941306
1.18936	0.822424	0.651827	64.256	1.17456
0.901879	0.600941	0.54358	3.16476	1.99708
1.27915	0.879578	0.650699	1.72546	0.905919
1.09414	0.687695	0.548697	0.929116	0.860389
1.40004	0.972321	0.677845	1.32673	1.75627
0.953185	0.618254	0.509049	1.29719	0.757701
0.94533	0.528403	0.517003	3.25962	0.622051
1.61836	1.23538	0.799609	29.6726	3.00618
1.34606	1.01551	0.74041	40.2892	1.02836
1.01087	0.73675	0.526155	1.53581	0.899051
1.73205	1.37659	0.856392	2.01817	2.70647
0.952645	0.617204	0.492194	23.8929	0.675439
0.927083	1.22205	0.513245	1.93223	1.09117
1.35715	1.30318	0.724996	5.40254	1.59442
1.85542	1.11518	1.00403	1.20332	1.29752
1.05041	0.680927	0.653394	4.31449	0.918598
1.02891	0.68762	0.671457	3.57952	0.838508
0.934121	0.787434	0.458217	1.40245	0.611258
1.30574	0.974067	0.515168	2.13463	1.03407
2.10214	1.92869	0.518433	2.19221	1.64565
1.62874	1.11715	0.670789	1.30619	1.29498
1.77976	0.798188	0.922902	1.73092	1.35453
1.77935	1.73862	0.887618	33.3959	1.39776
1.5332	1.02849	0.871547	1.22506	1.24686
0.966257	2.741	0.565918	0.865268	0.786728
1.20215	4.31422	0.652884	2.45091	0.84604
2.1494	2.71634	0.911974	1.30727	1.58985
2.25273	1.20772	3.00159	1.33419	1.53593
1.60738	0.948953	1.22664	135.999	1.19766
1.13502	0.812837	0.777106	1.07194	0.958795
0.90396	0.606441	0.540486	0.163157	0.716587
1.84075	1.30022	1.11353	1.2226	1.50455
1.65375	1.28812	0.786374	2.946	1.35943
2.42792	2.75212	1.22486	4.33831	3.08302
1.56383	1.03372	3.2174	15.1212	1.32127
1.37685	0.929342	1.00167	83.1273	1.10249
4.08222	42.7367	203.036	7.77931	3.25832
2.85066	2.00628	1.13174	4.7091	2.33363
4.46765	3.44149	1.53762	50.8172	4.42961
6.82813	5.24693	15.1543	49.3122	6.66846
2.38183	1.45209	2.59513	145.645	4.93487
2.30992	1.36748	1.35149	43.5603	2.16456
1.99766	1.37968	0.845156	84.6002	1.236
0.876782	0.600425	0.62978	55.1827	0.740161
0.917504	0.669132	1.27373	18.0337	1.01739
1.2367	0.842098	0.955501	49.3762	1.09076
1.24127	0.85549	0.690797	32.306	1.02526
1.44558	1.01134	2.67485	70.937	1.0808
1.99323	1.13956	0.820409	46.1433	1.73214
2.3579	1.62576	1.08043	71.7997	1.87799
1.8519	1.22674	0.8596	22.6947	1.55693
1.37123	0.910716	578.517	69.7647	1.10877
2.30121	1.57156	5.87811	127.583	3.55784
3.46156	2.29413	3.16725	54.9477	4.49503
3.27542	2.34336	2.01629	99.1725	2.96342
1.86363	0.978388	2.05326	158.14	3.13725
2.70978	1.79033	1.59652	39.2271	2.25052
1.70386	1.27574	0.976918	30.8077	2.0981
0.981737	0.655039	77.7609	27.13	1.58865
3.47196	2.3397	1.80411	5.68823	2.49021
1.59344	1.03182	0.810408	27.3051	1.20834
2.84549	2.36499	1.61006	3.29991	2.18314
2.59438	2.62862	1.38558	2.78705	1.91666
3.56679	2.22719	2.01305	1.51685	3.81581
1.31668	0.832565	0.952785	0.718735	1.42489
1.06816	0.751649	0.668739	0.365966	0.992939
0.96062	0.616811	0.789737	0.674962	1.19906
1.19629	0.751262	0.740428	5.84292	1.08379
1.00611	0.668734	0.537846	3.05614	0.86631
1.75548	0.94247	1.0467	2.86274	1.42898
3.56132	2.04699	2.3972	0.779473	3.39308
1.18217	0.765314	0.823591	0.363156	1.06519
1.13507	0.69498	0.723703	0.491569	0.949959
2.80468	1.81496	1.74873	0.881954	2.09207
1.81038	1.20486	1.57295	1.08452	1.77685
2.81147	1.38197	1.69546	1.6844	2.25678
2.14697	1.36439	1.67462	2.97004	1.99215
191.887	52.4609	5.99675	34.4422	8.63962
1.72191	0.885684	1.52557	1.56256	2.65685
1.96641	1.12391	1.46125	2.01524	2.20967
3.47007	301.474	2.71203	2.22924	4.2315
1.67968	0.962642	1.12837	5.35096	1.67029
2.11663	2.02532	1.29556	1.85747	2.13703
2.28256	1.75558	1.3031	31.0297	1.99729
3.87498	23.1421	4.49264	1.49009	4.48753
2.05529	1.2357	2.76481	5.7816	5.1474
1.16591	0.708676	1.54595	6.53787	2.65759
1.396	0.82653	0.834461	0.964515	1.10932
1.02394	0.62844	0.581486	0.587082	0.765709
1.79479	1.05352	3.25385	4.19473	4.08341
1.74486	0.998904	2.08879	1.33561	2.43902
1.30133	0.7565	1.95312	1.76216	3.94914
1.03892	0.611031	1.10344	2.40422	2.08217
3.67017	27.416	2.10454	4.90806	2.63628
1.38309	0.769242	0.797757	1.40517	1.07989
0.801785	0.461007	0.969162	2.0202	1.55501
1.17543	6.29018	0.738882	0.254961	0.950504
1.94464	65.5244	1.33234	7.82263	1.73081
1.03807	5.80714	0.663199	0.559337	0.88253
1.20055	0.62396	0.879165	0.981722	0.951692
3.45191	1.83694	2.12543	0.196501	2.60054
1.12802	0.582355	1.36976	0.931902	1.83782
0.960049	0.495818	0.617413	0.420101	0.703396
0.626862	0.347762	0.68372	0.671524	0.967871
1.04154	0.520734	0.708575	89.3836	0.92159
1.29435	2.17678	0.762548	0.878741	1.29636
1.02614	0.578698	0.644735	0.663813	0.826257
5.05632	2.59877	4.02895	0.000302882	4.45937
0.982529	0.487086	0.562969	4.60407	1.15855
1.26552	16.1403	0.767173	5.77245	0.85721
1.06102	0.953691	0.564633	2.29518	0.964683
1.08104	1.81071	0.837036	10.4162	0.930424
1.21176	0.575618	117.264	3.44711	1.40191
0.917938	0.438049	0.402822	4.95368	1.02996
0.688706	0.344295	31.4718	0.347918	16.9589
0.820918	0.391358	0.489589	2.22936	0.844224
0.776401	0.354308	0.434153	2.64658	0.570527
0.696332	30.8668	0.41274	12.2666	0.540869
0.626034	18.4691	0.383642	3.61314	0.465861
0.778968	0.39705	0.376825	87.4782	0.495443
0.883819	1.03348	0.554174	5.09859	0.55142
4.14123	22.3605	2.43804	1.17506e-06	2.68769
0.568389	0.249061	0.460398	6.50264	0.786036
1.40057	1.55148	0.848235	0.667226	1.17877
0.788983	0.31943	0.465778	1.92711	0.627256
0.620482	0.300135	0.381933	1.45073	0.445617
0.845082	1.82637	0.502472	1.61235	0.596989
0.685892	1.36127	0.453956	28.2252	0.603199
2.09483	17.3315	1.1405	0.151527	1.18816
3.06781	1.2667	1.83701	22.1752	2.02365
2.60307	1.08864	1.48141	0.279639	1.59928
0.431511	17.8475	0.300649	0.301998	0.528001
30.7004	34.6692	18.5275	9.47059e-05	21.0706
0.383401	0.129659	0.324322	29.3479	0.514681
0.654768	0.262075	0.410365	8.6922	0.493518
0.601123	0.182956	0.375534	1.52101	0.740151
0.735357	0.390414	0.516414	0.439549	0.681824
1.6662	17.7947	29.6439	0.301747	0.957087
1.65839	17.5849	29.5141	0.301747	0.952528
0.950224	2.24156	1.90128	28.1799	1.9331
1.15809	0.447434	0.716456	0.000228931	0.788266
0.338406	0.138598	0.210973	3.27605	0.322187
1.80048	0.696107	1.1102	1.10927	1.48048
0.931074	0.336484	0.556278	3.46488	1.11471
2.29237	1.29827	0.726289	6.74589	0.866385
1.76047	0.60169	1.1625	4.07045	1.29771
0.579432	0.258874	0.379504	1.35527	0.442746
0.695006	0.269127	0.42536	1.93844	0.535299
0.544086	0.206865	0.315876	0.887748	0.377103
0.641353	0.241338	0.398923	0.306635	0.461101
1.36757	0.48133	0.841567	0.271039	1.06793
2.59949	0.86479	24.0793	65.5845	6.69192
1.58413	0.942099	1.40593	38.5852	1.72665
27.8132	7.96348	4.98261	66.9727	8.75315
0.982099	0.593683	0.89224	1.55723	1.10703
0.373107	0.137027	0.61908	9.71894	0.753149
115.562	40.4143	80.2087	19.6549	82.0061
2.54424	1.24324	41.624	15.6722	5.62831
2.75712	0.932863	2.73977	6.1841	2.93695
1.01428	0.35677	0.715021	13.5245	0.861233
2.16441	1.10223	2.72659	2.17152	1.92857
0.7854	0.280642	0.609184	1.6457	0.755424
4.03679	2.74928	0.542992	1.70429	0.648768
0.802971	2.88452	0.489957	0.789113	0.578485
0.712384	0.276366	0.485872	0.944998	0.571283
1.76093	0.606335	5.32003	2.41689	1.72939
3.22525	1.5385	33.3527	101.694	72.1124
25.5836	4.19738	63.5803	218.708	85.1772
15.6186	5.74865	3.73169	93.1987	4.45487
3.36278	1.20155	5.27889	7.72194	3.45188
0.826107	0.316876	0.856064	2.01235	0.780649
1.08693	0.781362	0.783816	1.57284	0.997053
1.10794	0.427627	1.02848	1.48484	1.50239
2.00484	0.731075	1.79205	3.19599	2.31987
1.6284	0.692512	1.43956	2.98637	1.88628
2.14546	0.720979	6.46225	18.0152	7.5866
76.4329	9.02621	40.9514	146.69	30.5461
72.7362	22.3034	18.0475	57.1415	23.428
1.95141	21.0525	3.18203	2.24602	3.81847
0.548545	1.13824	2.69221	4.504	3.15932
0.837886	0.549302	1.66364	3.33988	2.09256
0.604064	0.217052	1.24752	4.66422	1.57656
0.762876	0.275164	1.45299	1.76136	1.94008
3.84517	1.4276	2.40297	1.35329	2.8543
10.4147	3.97195	54.1712	0.541118	64.2331
1.81846	0.546097	1.05185	0.672858	1.28731
0.724697	0.290836	2.20539	2.95306	2.87713
1.09707	0.394659	1.58856	0.984358	1.25286
1.13665	0.786201	1.59133	0.964365	2.03563
1.10306	10.3983	0.573771	31.2449	0.900496
1.34063	0.573064	0.903933	2.83958	1.36351
1.31854	0.532134	0.988777	1.04356	1.19836
0.638212	0.255123	0.529402	6.06995	0.867184
0.730918	0.303905	0.437992	1.44076	0.556883
0.73382	0.307816	0.474675	2.82595	0.549746
1.2413	0.543795	62.1873	0.824691	59.7525
0.684886	0.285288	0.948681	6.76983	1.17284
0.254184	0.111695	0.154589	0.442405	0.24695
0.919409	0.629601	0.56721	3.94563	0.731572
0.496954	1.07971	0.320414	1.97408	0.438581
0.693453	1.01325	0.517434	0.715965	0.501831
0.452737	0.705179	0.345174	39.787	0.396786
0.525687	0.315994	0.669692	0.646195	0.833421
0.523368	0.243326	1.3019	2.07172	1.62103
0.709565	0.35389	0.441448	0.00679872	0.524504
0.367975	0.176366	0.226474	0.220041	0.240153
0.307013	0.168097	0.195145	0.223464	0.230548
0.53613	0.263207	0.360907	0.544013	0.461311
0.576208	0.270939	0.769851	1.77484	1.11528
0.567413	0.263771	0.558951	1.38304	0.802475
0.900589	0.42543	1.73789	0.981838	2.25144
0.426795	0.204538	0.335739	13.0537	0.469397
0.635229	0.315266	0.442982	4.81456	0.517904
0.633303	1.5029	0.369792	0.802923	0.603633
2.40237	1.67917	1.35785	3.53833	2.28516
1.26603	0.630285	0.731382	6.15905	1.21906
1.74042	0.878375	1.1328	2.31975	1.76633
2.00275	0.966288	1.25529	142.949	1.90911
1.3245	0.554683	0.722181	2.11313	1.0985
0.747837	0.393989	0.46972	2.19974	0.457465
0.751519	0.399287	0.494033	1.23292	0.663118
1.20833	0.651407	0.743262	1.9261	0.974475
1.10865	0.622368	0.739572	2.49609	0.878562
1.1572	0.653963	0.705076	2.4093	0.775686
1.91947	1.09352	1.20914	4.38148	1.46773
1.87703	0.979034	1.17938	0.000157706	1.69077
2.19636	1.26287	1.44649	0.14494	1.74799
1.09505	0.506073	0.754502	6.60757	0.812844
1.0456	0.632711	26.4169	2.06452	0.924551
2.43174	0.835056	1.26348	77.5755	1.59399
1.68883	3.21806	1.02371	34.0585	1.18308
1.18707	1.1627	0.801788	64.7461	1.11699
0.911523	0.548778	0.605988	4.43228	0.743437
0.52516	0.318008	0.376906	13.7656	0.455022
0.887887	0.543885	0.798483	70.6422	1.11742
0.874647	0.83931	0.717337	92.6393	1.13751
0.840245	0.533794	0.457289	3.98218	0.737302
1.30566	0.831218	0.974576	1.46552	1.334
0.897983	0.585378	1.01885	5.44313	1.26393
0.678056	0.447248	0.466157	0.163687	0.554228
0.261195	0.173666	0.225804	25.0561	0.243821
0.776388	0.520583	0.523007	7.98004	0.6216
1.79692	1.04139	1.04213	1.71449	1.38733
1.36034	0.94542	238.518	48.8368	1.10295
1.49079	0.937302	0.704195	10.4217	1.09108
1.80196	1.1262	0.873141	3.08408	1.44498
0.933272	0.650956	0.743824	8.06231	0.925365
1.03863	0.713642	0.87576	6.98508	1.17383
1.32792	0.944292	0.663028	4.80569	1.01103
3.63566	2.75033	1.40477	5.77755	2.21073
1.5471	1.0806	0.95199	6.04488	1.28901
1.10217	0.818152	0.722243	6.19859	0.931097
1.11052	0.713448	0.928956	6.93911	1.11158
1.03202	0.812963	0.684711	37.7964	0.96889
2.45418	1.86377	1.64696	26.4252	1.91127
2.68912	2.11191	1.58748	45.906	1.8599
2.21037	1.78105	1.60045	32.3945	1.96966
1.62722	4.72042	1.11487	34.812	1.34776
1.66865	2.57188	0.915545	29.5335	1.24814
1.38539	1.0496	0.699466	31.9498	0.991506
0.915156	0.704895	0.5268	6.29165	0.676531
1.03172	0.815794	0.580817	7.83839	0.714545
0.874206	0.651529	0.869452	1.74121	1.44293
0.817226	0.663086	0.980529	3.58624	1.67596
0.945108	0.786129	0.884956	31.0645	1.44434
0.930484	0.743838	0.524892	1.42627	0.681701
0.775125	0.610444	0.354101	2.10047	0.44329
0.772092	0.614594	0.568453	9.85828	0.888153
0.870001	0.704941	0.579315	23.2089	1.25104
1.03586	0.866838	0.428078	18.6858	0.882194
0.641025	0.447969	0.356459	3.90503	0.78588
1.08695	0.852158	1.23917	105.536	1.82901
1.01075	0.830257	0.851279	87.9026	0.933974
1.28759	1.06446	228.076	172.623	1.08848
1.15832	1.04815	1.23959	37.2676	1.66231
1.05682	0.849705	0.694592	205.837	1.50465
2.04634	1.67096	1.03739	50.5703	1.66767
1.00468	0.835197	0.491682	37.3475	1.33082
0.798476	0.661891	0.68368	95.924	1.82289
0.81535	0.676976	0.63537	145.081	1.14326
1.29729	1.08967	0.762871	36.8649	1.53998
0.56913	0.471125	0.292465	50.8207	0.454395
0.953372	0.798148	0.640562	29.0929	1.0952
0.954049	0.700234	0.574076	4.96537	1.42213
0.632393	0.495577	0.378534	100.838	1.32786
1.31438	0.727065	0.846186	103.754	1.28271
1.70216	0.965764	2.74059	41.6636	2.51964
5.68582	1.81017	7.10025	83.8517	8.60365
1.49984	2.65743	1.056	5.49783	1.16963
1.42905	1.1615	0.876376	82.7645	1.06091
6.05244	1.73233	3.94821	64.4383	3.0068
4.32669	2.34799	5.23138	154.959	17.1229
0.603088	2.50955	0.377799	0.852072	0.616367
1.33822	0.874543	0.877859	69.9401	1.83205
0.32188	0.837652	0.192974	26.529	1.46623
0.470001	0.345686	0.311434	53.0357	0.397676
0.798299	0.666383	0.555748	27.1519	0.809084
0.833435	0.700819	0.539847	6.8622	0.600029
0.925565	0.727696	7.62312	34.9808	0.895232
2.33405	1.93431	1.62123	224.423	2.19966
38.7098	32.3407	5.63007	406.592	8.49655
1.27745	2.47395	0.69932	230.805	1.03305
0.490626	0.366425	0.300965	8.12952	0.73682
0.952501	0.712218	0.603161	39.5674	2.26174
1.19416	0.951314	0.66543	161.555	0.847138
1.60112	2.53463	1.00313	235.984	1.73001
0.642119	121.696	0.346106	16.1375	0.894503
1.54276	1.20019	1.51101	21.129	1.98841
0.853484	0.628222	0.580952	161.122	0.888605
0.363626	0.248889	0.332037	2.42731	0.341526
0.600913	0.502456	0.34259	0.928688	0.539134
0.837894	0.467349	0.624944	30.7219	0.818984
0.663922	0.484599	0.626279	14.2917	0.824947
0.30422	0.215559	0.228762	19.6014	0.349732
0.866309	0.687412	0.504438	18.8277	0.87366
0.521356	0.365522	0.28098	7.6761	0.452252
0.585653	0.453183	0.364919	7.54667	0.61678
1.21492	0.975492	0.743562	60.7088	1.07212
0.756341	0.519114	0.786341	29.6766	1.04969
0.978218	0.726109	131.582	113.096	1.07905
1.15855	0.853644	91.8132	48.977	1.3054
8.04622	13.1003	2.6686	24.6149	3.37063
0.889177	0.631561	0.663768	13.2628	0.705401
0.454303	0.33689	0.354242	29.3978	0.411724
0.946841	0.691928	0.544212	13.8992	0.702383
11.3785	13.888	0.830194	3.81569	1.97217
2.37526	1.15545	0.910483	4.60387	1.50102
1.49731	0.665839	0.597543	21.2369	1.14141
0.855583	0.573636	0.474344	8.35504	0.644826
0.901621	0.56952	0.73485	4.77201	0.741686
2.60899	1.89219	156.732	68.3725	2.59503
0.757519	0.525887	0.562244	2.93928	0.728213
1.13149	0.770812	0.674914	7.34706	0.858468
1.03565	0.681003	0.708948	8.56782	0.950351
1.11522	0.747778	0.655312	3.23636	0.874505
2.34509	1.7808	1.0434	4.81264	1.43132
0.804189	0.620171	0.454025	2.02186	0.67297
0.689767	0.450545	0.365695	11.4769	0.840631
0.892949	0.592585	0.685397	3.85598	0.841509
0.714572	0.49248	0.610715	3.49865	0.589301
0.567925	0.383508	3.1981	4.35809	0.355634
0.539728	0.358773	0.44962	1.95512	0.587564
1.003	0.841386	1.57805	3.85088	2.48167
0.620263	0.411007	0.446621	2.48152	0.652412
0.710063	0.404528	0.441954	3.2035	0.600003
0.743754	0.491505	0.573468	12.9408	0.574444
1.04689	0.597402	0.683217	2.78679	1.06145
1.85622	1.24387	0.963679	2.89055	0.943047
0.962012	0.647059	0.591978	1.85805	0.686569
0.985684	5.29729	0.844469	4.1759	0.95305
0.592332	1.79411	0.652648	2.31239	0.546877
0.485271	0.314962	0.314916	1.46064	0.321157
0.581454	0.360195	178.766	2.92032	0.71149
1.13889	0.695995	0.860479	36.8617	0.956126
1.2918	0.749279	0.70615	20.9227	0.816532
0.627797	0.377482	0.324532	2.03111	0.464459
0.544445	0.30976	45.2358	15.0864	0.756647
0.664533	0.382641	156.559	78.9704	1.55841
0.708067	0.411679	0.493076	1.71505	0.521339
0.880251	0.543867	0.560346	1.9165	1.29853
0.943642	0.551482	0.734062	2.72417	0.734661
0.816937	0.473397	0.454426	1.29904	0.617017
0.913555	0.49874	0.433478	1.31423	0.679449
0.922128	0.545535	0.475694	11.4312	0.840242
0.732671	0.402781	0.685024	6.57353	0.840066
2.15096	1.3571	2.07777	17.0622	1.85591
2.29209	1.43025	30.8176	29.2565	4.36785
1.76169	1.09822	1.06696	7.03002	1.37411
1.47977	58.5935	0.710758	2.29008	1.17556
3.68723	11.0105	60.3137	5.65665	2.66238
1.60588	116.613	0.609007	2.76613	0.931187
4.81465	3.1062	181.41	16.6486	4.61976
0.852801	0.449613	0.484562	1.43871	0.677957
1.06597	0.671052	0.651863	1.8414	0.84339
7.03003	3.63468	3.35021	8.11735	5.08715
1.84524	2.79469	0.954209	4.65996	1.20694
0.799738	1.26377	0.489325	56.1951	0.604706
1.1298	3.31322	0.629707	1.98986	0.882428
0.925428	0.545484	0.524433	2.31666	0.755093
1.09072	0.63632	0.74134	1.78141	0.839429
0.572713	0.359173	140.661	70.9452	1.23991
0.468982	0.294078	131.363	20.9182	1.73481
0.491694	0.258249	0.469481	1.74219	0.569977
0.226801	0.138047	46.1947	12.7586	66.2082
0.252844	0.140824	2.75018	80.1208	3.82564
0.360003	0.207262	2.45153	7.10011	3.50023
0.44947	0.238717	12.9988	42.6822	1.22649
0.356018	0.227357	74.9456	6.4662	1.24038
7.84253	4.86659	1.6954	12.949	6.13269
2.13021	0.782793	1.3819	6.07363	1.77956
2.46252	1.55759	1.39213	3.5294	2.08303
0.253542	0.152045	1.17097	3.6047	0.48272
0.226613	0.121924	86.0288	49.6882	1.0494
0.118535	0.086793	170.246	48.1211	146.316
0.460935	1.46027	105.134	4.07578	132.083
0.602803	0.340261	0.65017	1.63095	0.444478
0.663305	0.332107	0.441218	1.85007	0.564679
0.342925	0.193264	0.229011	2.5533	0.268138
1.97225	1.46375	1.07339	3.50041	1.51939
1.33895	0.779229	0.694613	2.35832	1.08468
0.511277	0.305157	0.471248	1.4658	0.663866
0.569941	0.348686	0.291021	0.754113	0.648425
0.737188	0.43118	0.329344	3.16805	0.913758
2.65769	1.1475	1.44612	4.28704	2.02687
1.03145	0.755154	0.597833	3.95665	0.803163
0.685975	0.416414	0.46914	2.11594	0.494575
0.52602	0.318515	0.657965	1.20682	0.714776
0.589909	0.372435	0.281713	0.775105	0.468152
1.33257	0.815221	0.916894	2.37013	1.13734
1.36046	0.852059	0.861439	2.25802	1.65929
0.673562	0.385965	0.379132	0.851223	0.941116
0.590201	0.375966	0.570196	9.64785	0.706406
1.35615	0.874362	1.08884	2.87515	1.19083
2.40048	1.52046	1.29459	1.76613	1.83609
1.31908	0.816983	1.18549	3.74795	1.70953
0.71269	0.440692	0.39781	75.5509	1.39372
1.28778	0.801814	0.590048	130.291	0.966757
10.0045	6.36345	5.08568	39.3863	7.48401
3.7563	2.37471	1.87921	6.12726	3.61394
2.56977	1.44645	1.3096	11.0768	2.39484
4.71596	2.70252	2.40125	5.9281	3.89899
0.576513	0.333216	0.309552	33.8445	0.722861
0.577826	0.337428	0.496331	95.0862	2.55825
3.09375	0.955443	1.14412	19.8676	2.4699
0.861785	0.515093	0.479735	3.23519	0.870526
2.10008	1.28408	0.69505	38.1694	1.68209
0.958979	0.590653	0.525061	1.36472	0.800337
4.761	2.49231	2.44361	3.5443	3.81639
0.602389	0.384148	0.271067	1.66408	0.403597
0.113212	0.0688758	0.0875691	0.994465	0.18023
0.747844	0.448305	0.622641	0.824531	0.8767
4.37637	2.60543	3.4031	4.55014	4.88044
5.70084	2.70581	2.5703	4.51577	3.15574
3.13525	0.467846	1.66602	2.86636	2.28252
1.44439	0.876065	0.610872	0.451684	0.854069
1.11186	0.674333	0.569658	0.363808	0.76465
1.12959	0.693219	0.581879	0.163724	0.720828
1.53302	0.90146	0.827054	0.517579	1.10299
2.86884	0.762097	1.21641	2.10012	1.89588
1.47765	0.586099	0.563455	2.22283	0.867979
1.81251	0.845478	37.1638	2.39158	1.27864
6.13628	3.24847	3.09731	56.7505	4.22657
2.16382	1.29626	1.08646	0.989659	1.58802
0.948105	2.62452	0.525513	0.257138	0.808366
3.78926	2.22358	38.5237	1.757	2.6506
45.0306	26.7872	14.0251	10.5017	8.24117
0.658974	0.398261	0.712932	1.41013	0.915003
0.515118	0.344804	0.702155	10.9717	0.950397
0.443847	0.26644	0.340581	0.42404	0.470348
0.793124	0.430816	0.375852	0.197061	0.705652
0.597919	0.289483	1.23863	2.21752	1.61936
7.31678	3.56265	74.9857	4.76224	2.9472
6.94896	3.65184	13.8012	25.9755	2.74243
3.94456	2.27627	21.1598	12.5577	2.31541
1.97073	1.11063	27.6344	16.0154	1.38472
2.45225	1.01155	20.4663	6.01843	1.45649
1.10676	0.586371	1.04808	1.40743	0.812247
1.38237	0.743792	13.5419	6.2735	1.09209
6.00816	3.03289	1.72901	13.438	5.45254
0.681264	4.61553	0.4421	3.91405	0.50512
1.31895	0.694927	0.545512	1.41606	0.700829
72.1433	50.9341	115.084	8.62312	71.8254
129.739	77.3049	6.66375	11.4136	8.25673
1.88787	3.54076	2.15324	11.839	2.95957
6.01992	3.92951	112.296	4.81241	1.50691
0.813666	2.77697	0.403442	0.443748	0.481076
0.571286	0.300546	0.286726	0.454788	0.381886
1.90994	0.922361	0.838265	2.25808	1.06932
61.9324	29.6719	12.2002	6.32165	15.4928
118.193	48.2159	5.80853	8.4979	17.9126
3.72788	1.69584	8.74772	8.74263	5.09869
1.8276	1.80267	1.05962	3.49957	1.47286
0.848251	0.823522	0.480455	9.79543	0.613433
0.322223	0.149107	0.247096	6.69979	0.348384
0.542984	0.2145	0.265741	11.9415	0.331641
0.539504	0.861357	119.953	0.28471	0.350639
0.526998	2.53061	0.310736	0.389012	0.480334
1.19214	0.552641	0.684289	0.375768	0.826715
1.03233	0.463357	0.562558	0.396176	0.684082
157.883	8.22272	3.26407	35.3656	4.1512
219.079	21.163	3.53787	18.8849	4.40452
0.421945	2.71353	0.234822	6.78424	0.351668
0.609141	4.70844	0.916392	22.1466	0.551813
0.620775	2.3414	0.426321	11.9995	0.445636
1.01791	0.427182	0.57658	8.20014	0.672941
1.65528	0.79481	0.891417	4.75403	1.1634
0.774792	0.361241	0.421501	10.5476	0.520302
0.80289	0.393567	11.347	11.3066	0.46595
58.8621	6.38416	8.07733	2.09804	11.315
50.5478	19.929	2.9331	4.51377	4.94931
0.655775	0.21852	0.551916	7.11948	0.324564
0.828358	0.496135	0.623176	13.0841	0.621633
0.909271	0.353423	0.59213	0.420069	0.897128
1.66135	0.607425	1.04981	12.1729	1.28606
1.3682	0.40052	1.78498	11.9026	0.669028
2.7761	0.712506	1.59448	2.10612	0.777513
2.86303	0.508639	1.95051	43.6552	2.94044
0.786109	0.497555	0.592237	2.85167	0.453838
3.21837	16.146	1.4311	1.17848	1.57571
2.36856	0.855585	1.35311	0.832072	1.69291
0.483756	0.182812	0.306857	0.966326	0.623841
1.20236	0.438986	0.779194	1.28642	0.837824
0.89749	0.319907	1.27652	3.16976	0.845867
1.15278	0.395754	1.0448	20.8282	1.04556
1.08495	0.408371	0.720964	2.46659	0.741696
1.10187	0.407273	13.5272	19.8575	1.36104
0.293698	0.354319	0.19355	1.57408	0.200423
1.68632	0.632193	0.886567	0.287759	1.10612
0.389861	0.140292	0.229751	0.328478	0.274452
0.521545	0.193596	0.292838	4.86487	0.351748
0.704838	0.242636	0.395649	7.46706	0.485716
1.38205	0.480189	16.9342	6.45729	0.920504
2.34259	1.6588	3.43837	32.8308	1.62062
2.23111	1.77923	38.0673	11.1231	9.78457
1.91746	0.462979	32.8243	5.20469	30.7097
18.9083	1.54342	34.9312	3.91444	3.27843
0.754795	0.314024	0.538299	5.5324	0.434881
0.654936	0.674102	0.46393	0.294667	0.495697
0.543331	0.188865	49.7618	0.599529	0.396106
0.458214	0.146299	0.40421	1.63488	0.333039
2.33066	0.772037	2.14967	12.5519	2.53569
2.46025	35.2226	1.37261	0.113274	1.62977
0.923409	0.588627	0.540344	0.0543709	0.626489
0.563559	0.279286	0.327245	0.319557	0.366052
33.5537	8.92781	9.87441	6.98898	5.47235
125.019	4.14702	2.3882	7.17685	3.22476
50.1469	1.19357	88.7166	0.951699	107.051
0.563644	0.950401	0.472363	0.213099	0.442535
0.587847	1.0869	0.32078	1.12238	0.405028
0.439332	0.468545	0.405823	0.56449	0.686292
0.587113	0.938829	0.50679	0.850441	0.458709
0.650188	0.98222	0.383143	0.97014	0.447436
0.362786	0.239686	0.300872	0.300388	0.246983
0.923173	0.392139	56.8272	0.350047	0.560524
0.941678	0.308316	50.3827	4.38672	0.676818
0.86021	0.270606	0.506376	0.52425	0.56079
2.19353	0.647939	34.0351	3.30135	42.0402
2.89729	0.89024	32.6432	4.57479	40.5008
51.2297	2.61767	3.08918	6.80876	3.86547
2.84152	4.26654	1.26291	0.996992	1.52903
0.411524	0.136315	0.249634	0.132084	0.308472
4.41677	1.43319	2.49728	0.643158	3.07875
6.3553	2.03996	50.8291	8.5018	35.1735
5.92612	1.89592	27.3579	10.7478	83.2883
5.52064	1.68849	22.2542	22.9655	61.2873
40.8551	2.27529	0.999637	4.6733	1.71557
67.1499	1.8807	1.14775	10.0445	1.57952
0.890405	0.288976	0.434397	0.580022	0.624058
0.506146	0.179593	0.285493	0.463356	0.361892
0.706977	47.7014	0.250873	0.837684	0.333023
0.806138	0.317562	0.451664	0.389895	0.569247
0.693284	17.8116	0.391331	0.277557	0.540164
2.53902	1.03052	1.43502	0.933321	1.80547
1.68676	1.85301	2.98385	6.87663	3.97298
2.05073	6.2137	4.4339	9.2841	5.3931
2.15408	0.819758	1.19508	1.5681	1.54035
50.152	4.20077	1.37605	4.58671	3.17679
1.25646	17.1757	0.66578	6.09062	0.884688
0.160929	0.0583023	0.142988	0.350993	0.186406
0.843898	0.318056	0.679096	1.51827	0.838905
0.442892	0.158475	3.8944	3.9676	2.01385
1.3254	0.497969	0.770548	3.44234	0.983771
2.58084	1.05359	6.1837	0.854464	1.85405
1.05853	0.397287	10.4712	11.5502	0.815202
3.47892	1.19225	2.12622	1.07279	2.58297
2.12067	0.838097	1.18989	0.95206	1.50756
1.26365	0.540483	0.750081	0.986335	0.994293
0.588871	0.209014	0.529017	1.32529	0.685741
0.85268	0.605531	0.481659	0.177494	0.627745
1.06453	17.6014	0.608956	0.431573	0.77445
2.10119	10.7189	1.6482	3.26835	1.69646
20.871	16.3942	1.84168	4.54641	2.25567
0.333487	17.8402	0.21831	0.053541	0.260002
2.35493	1.00286	1.38755	0.0583339	1.77967
7.46365	5.21005	4.44398	0.119352	5.51661
0.973468	3.47627	0.592616	0.0730083	0.824051
1.65953	1.28158	0.908999	2.23833	1.02311
1.60109	1.60574	1.12583	5.79484	1.41057
1.24293	4.53147	0.741512	2.23561	1.12986
0.697338	4.56497	0.736698	4.55845	0.694676
0.751184	0.35728	2.82048	6.21329	0.911189
0.810525	0.353429	0.509869	1.55208	0.775439
0.509984	0.0899715	0.316816	0.460121	1.45161
0.580921	3.14919	0.789081	0.611428	0.503621
0.712498	0.346023	0.426326	0.415673	0.74854
0.71355	1.64046	0.513956	13.264	0.777606
0.372933	24.3062	0.238666	0.354374	0.486593
0.793408	0.465169	6.10196	1.6414	0.888244
49.4263	46.169	43.4626	1.19938	2.31691
0.527817	0.258387	0.328912	0.231423	0.931544
1.37997	0.725557	0.561864	0.771659	0.855775
1.4665	0.80592	1.03634	1.14034	2.71246
0.459113	1.34237	3.94118	0.59225	2.78875
0.264187	0.172993	0.285849	0.699641	0.435429
0.258252	0.728298	0.451917	0.0693618	0.300403
0.155863	0.117963	0.107692	0.502021	0.135812
1.17624	0.773725	0.682531	40.5712	0.876932
1.22627	0.776296	0.809196	6.64939	0.945498
1.11703	30.6556	0.677337	0.724353	0.854194
1.38552	1.17056	1.0559	1.31199	1.36494
0.951608	1.47128	0.545367	0.317616	0.699748
0.557849	1.03053	0.369231	1.37474	0.454231
0.640206	0.378582	0.369589	9.4828	0.483315
0.729598	0.453223	0.418987	0.645895	0.525217
1.07406	2.73801	0.803175	0.79797	0.761224
0.386029	0.244391	0.315996	0.926316	0.345517
32.4711	34.6344	2.88731	22.3106	4.49118
1.31269	0.822744	1.30449	11.9611	1.95364
0.34283	0.262861	7.31863	14.3054	7.71389
0.385617	819.756	1.00631	2.11082	1.74975
0.657036	0.419828	10.8176	8.21906	0.518566
0.993959	0.666827	0.615385	8.90713e-06	0.745007
1.06209	0.734121	0.593279	3.64652	1.41566
1.1606	0.806847	15.1194	0.111815	22.3295
1.13701	0.779402	102.081	0.0733635	68.6476
1.15905	0.883249	231.016	0.0724539	92.4705
0.387441	0.279558	40.575	0.072715	0.292489
0.723917	0.502386	0.424855	5.79179e-05	0.558361
0.764298	1.08803	0.512635	0.0389209	0.644521
0.901545	0.638086	0.54311	0.964801	0.678677
1.80693	4.32467	6.80535	17.5368	3.37083
0.325694	0.252537	0.740533	10.1537	1.24206
1.61255	1.27221	0.974742	4.96955	1.37311
0.916821	0.964831	0.536042	1.96652	0.745189
0.664674	0.570945	0.428419	6.40315	0.529374
0.805491	1.8198	0.507791	41.4553	0.632972
0.330922	0.260905	0.225051	8.90258	0.299868
0.477272	0.2657	0.38393	30.4555	0.739365
0.887863	2.14267	0.581178	3.96244	0.734759
0.504648	3.24836	0.329591	6.84406	0.393615
1.42382	2.88491	0.851172	10.2011	1.08875
0.563174	4.11719	0.353977	28.0424	0.553255
0.58632	0.758315	0.328622	23.3474	0.523032
1.57465	1.14839	1.00163	12.8884	1.506
2.32619	5.83419	1.39199	10.1664	1.76388
7.31206	5.83513	6.36415	27.7738	8.00634
5.31285	354.801	3.52595	30.325	5.79206
8.33245	11.2275	5.26971	88.1254	7.48507
1.50708	11.4809	1.04034	169.954	1.12331
2.05051	6.1188	1.20388	59.173	2.00672
3.59874	9.7023	2.96964	53.1044	3.88877
5.70881	5.21045	2.72161	16.3324	6.03892
3.64932	11.2266	1.10266	20.0376	4.31637
1.85335	59.3148	0.782228	43.8278	2.78376
2.49349	8.19314	1.10574	13.1533	1.42132
2.30637	56.8897	1.62904	152.607	2.19478
1.60674	11.2961	39.8555	112.342	1.17352
1.75337	5.5026	1.79587	17.7769	2.41364
2.21974	13.2316	1.50379	4.3559	1.99947
1.08075	10.2951	0.587092	130.526	0.812598
1.07345	19.6492	0.605364	19.7755	0.792582
1.09801	7.70447	0.658972	16.7985	0.83186
1.03838	1.24573	0.622657	1.45153	0.786312
0.790845	0.659528	0.505414	0.601446	0.558156
0.987676	0.797207	0.522674	1.32096	0.741295
1.73253	124.037	1.06305	3.68059	1.39086
1.18533	301.159	0.752392	1.53636	1.01612
1.41653	0.996887	0.718056	2.11643	0.970855
2.99739	3.16237	2.26005	5.66758	2.82673
7.39669	10.8281	4.28123	11.3834	5.29137
2.36803	135.375	1.37521	5.3768	2.54518
4.91568	3.96168	2.56714	7.03203	3.67376
1.35023	1.60241	0.645831	1.85335	0.95756
0.621618	0.462304	0.320931	0.768201	0.43306
1.18343	1.17929	0.593387	2.13563	0.935528
0.526203	0.395911	0.224677	2.9858	0.365761
1.84856	1.12372	2.08743	6.77545	4.94224
0.887757	0.651632	0.52589	11.9697	1.52306
1.7723	86.1569	1.37202	16.0729	2.92929
1.62393	2.84982	5.56878	2.46023	1.93687
0.529036	2.61166	0.305277	9.77292	0.650071
0.619345	0.602707	0.437511	29.803	0.569828
0.535779	0.854941	0.344259	12.7511	1.04136
0.850997	2.31566	0.571636	19.6645	1.30521
0.613971	2.29705	0.366254	22.2764	1.50425
1.46372	1.2947	11.5815	58.1812	15.6199
0.986644	1.58794	0.462144	6.41341	0.728754
1.22056	0.947961	0.676261	10.3484	0.90276
0.782822	0.558606	0.432903	22.352	0.583374
0.935823	0.511499	0.559216	2.15486	0.691333
1.00544	1.20392	0.529777	38.6166	0.828828
0.887016	1.59439	0.486651	3.23573	0.652006
2.23834	0.887237	0.721858	12.6621	0.951672
17.8259	2.67733	1.71236	2.85918	1.94966
1.469	1.05952	3.27449	6.46581	1.20169
1.97468	1.69617	1.00412	3.30545	1.77768
2.43295	2.22997	0.948065	1.93648	1.68376
1.0287	1.45858	0.60589	1.29351	1.61473
0.5485	0.410189	0.315251	1.51914	1.21857
0.828847	1.69998	0.467126	1.27909	0.694693
0.314377	3.5831	0.147181	0.414471	0.431062
0.590702	2.65473	0.265083	4.61421	1.17619
0.648002	1.62103	0.183028	1.25043	0.795222
0.715749	3.50668	0.427875	0.786111	1.35258
0.58121	3.30301	1.81748	0.268015	0.834696
1.26227	0.845927	0.734048	2.7099	1.026
0.449408	0.797861	0.391108	2.4133	0.529313
0.772337	0.820098	0.818801	13.1334	0.820073
2.37364	1.69102	3.15148	8.98827	2.06395
0.519405	0.675893	0.33657	1.06385	0.417647
0.184576	0.357299	0.100108	2.4016	0.852574
0.324139	1.04277	0.384952	2.90585	0.523136
1.07329	0.768572	0.674548	10.762	1.21998
1.24253	0.916213	0.687394	2.52411	1.25542
2.14279	1.32568	1.02413	5.82433	1.55246
2.39055	3.37709	1.08376	8.46793	1.77155
3.38308	4.39061	1.72159	6.23764	2.69254
2.26267	2.27166	1.12824	2.45646	1.66683
0.658328	0.948192	0.337202	1.65536	0.481562
0.471868	2.30391	0.259638	1.23357	0.364214
1.0457	1.6555	0.516371	2.04513	0.876219
0.830596	1.99786	0.410157	1.51399	1.00118
0.640806	3.4492	0.282334	74.7437	0.47314
1.61123	4.9756	0.845803	3.63982	2.25147
0.812445	3.03909	0.386277	1.51717	1.1884
0.842185	1.64551	0.790808	1.8048	0.87046
1.85089	2.18665	1.15715	2.73143	1.40775
3.16564	1.65333	1.44913	4.26739	2.17722
0.518585	0.989237	0.248695	0.874311	0.406095
0.69472	1.23064	0.597147	0.901295	0.540225
1.86707	1.00574	0.958938	4.34633	1.44974
4.57433	3.41844	2.17503	11.8753	3.2564
2.37889	6.1097	1.01157	138.387	1.73083
2.30226	74.0036	1.33241	139.517	1.73092
2.54747	38.6433	1.21318	4.18089	1.93623
32.4025	10.5748	1.10844	3.97031	2.11073
1.12294	41.6175	1.07808	3.13398	0.984346
3.16025	33.9211	1.708	5.92043	2.34248
0.503353	5.44352	0.27406	4.60873	0.3703
1.1164	8.9821	1.21319	7.67215	1.19375
1.31468	0.996105	4.45554	7.95726	0.953323
0.673974	0.381611	0.634352	1.29723	0.546672
0.579957	1.27123	0.275256	0.957324	0.443334
0.691589	0.510335	1.56465	13.7755	0.570253
0.567095	0.634581	0.506629	8.18111	0.630259
0.725115	1.99374	0.820119	0.488602	0.423767
0.130494	0.0783231	0.673182	2.02244	0.944827
0.35044	0.183112	0.417934	2.09803	0.531222
1.16603	0.678932	0.906228	1.51566	1.05924
0.210704	0.118727	0.315136	0.645262	0.217695
0.941831	0.525509	1.81245	1.73096	0.747619
0.570933	0.329396	11.3588	0.738177	0.444052
0.191983	0.100675	36.9685	0.240976	0.166892
0.458804	0.260643	0.230165	0.613748	0.348885
0.317823	0.183849	0.171137	0.482829	0.253909
0.0876899	0.0537692	0.0762505	0.200526	0.0842666
0.0849307	0.0485746	89.6274	32.2512	0.703918
0.0777738	0.0496505	18.1008	0.239068	0.17201
0.581623	0.498851	0.301287	0.760275	0.44673
58.4367	123.98	24.0953	30.8044	39.7465
0.628576	1.89349	17.6754	0.642109	0.480582
2.63209	1.50957	45.2644	10.3325	3.01242
0.125405	0.0691759	0.157461	0.140897	0.133818
1.1953	0.154353	0.625224	1.6084	0.960453
0.17445	0.38223	0.338868	0.388281	0.166468
0.198185	0.218769	0.590074	1.20596	0.334886
0.408105	1.21548	51.7811	0.78973	0.307989
0.344433	1.63931	0.539759	7.73561	0.77273
0.765071	117.148	0.408318	1.01225	0.578698
0.292227	1.87545	0.183436	0.347379	0.226686
0.476444	0.666341	0.240638	34.9715	0.373796
0.83696	143.158	1.42504	1.70647	0.679714
0.790751	50.4831	0.500058	29.6161	0.721057
0.448414	0.352835	0.272555	0.588429	0.702985
0.602204	0.384657	34.5436	11.4045	51.8598
0.896675	0.430756	0.657311	9.20853	22.014
0.549136	0.313546	0.593813	1.48986	0.410985
0.0919794	0.0651233	0.0655258	0.0821464	0.0758956
1.07959	0.618214	0.494034	1.28521	0.887062
0.206972	0.200513	0.147776	0.235175	0.619325
0.282321	0.197096	0.240946	0.472888	0.511852
0.933281	53.1866	0.325411	0.544224	0.339327
0.905981	0.531987	0.642714	1.58656	0.565783
52.0313	29.8801	46.9606	62.0071	38.1501
2.94102	0.683619	5.42487	9.03668	2.46138
3.62613	0.583323	2.09064	5.68741	2.84994
2.02775	2.95799	0.967078	0.476772	1.51602
0.450167	1.86254	0.273436	0.460891	0.386257
0.386071	0.22486	0.607415	1.64407	0.371245
1.56659	0.950097	533.569	32.8047	3.30255
0.542713	0.351791	163.674	0.749805	0.369307
0.562828	0.575331	0.387882	0.889439	0.701073
0.517193	57.4562	46.905	1.35849	0.812568
0.491736	0.335318	0.288451	1.00958	0.422884
0.34203	0.330042	0.186454	2.43946	0.215446
0.183467	1.08977	0.100135	10.6238	0.174454
1.17026	0.647565	0.594541	33.343	0.859251
0.604117	0.343001	0.493412	13.4386	0.458863
0.706707	0.384719	3.28818	29.1996	51.2048
0.294296	0.176396	25.7094	0.249951	0.234701
0.496871	0.370767	0.668356	1.65878	1.12513
0.494358	0.274953	4.37092	14.1503	1.50401
1.26012	2.8853	1.8688	3.40913	0.8902
0.356218	37.0394	0.256741	17.3239	0.956314
0.37978	0.695879	0.181295	1.05114	0.302706
1.77151	1.54234	0.866295	2.65471	1.34517
1.33858	0.994594	0.940366	3.92198	2.06625
0.443979	1.60047	0.740741	11.5556	1.50796
0.895636	2.55786	265.98	4.08803	30.0173
0.772328	2.94155	0.447809	0.780346	0.979938
0.516821	4.42793	0.317881	0.228911	1.2114
2.43122	117.613	1.15212	2.13145	1.87971
0.548685	0.96648	0.348273	0.556839	0.596054
1.70572	3.66287	0.562998	1.97801	1.40426
1.37873	3.00889	1.55817	3.36336	1.0179
0.89249	3.66731	9.69245	0.604323	1.15041
0.741112	4.32668	46.217	3.73579	0.831934
152.78	81.4783	62.1536	18.3682	107.424
1.948	1.01599	0.66396	6.28727	2.46514
0.999236	1.71967	0.596189	9.11371	2.6442
0.965126	4.26439	0.537592	1.32977	0.893408
2.01203	5.53428	0.399803	6.11813	1.62507
0.771051	0.386334	0.465664	0.799037	0.689217
0.663892	0.330797	158.635	0.589088	0.705985
0.807863	3.01457	0.448405	1.10884	0.848315
0.751693	0.354465	0.47904	0.956355	1.05262
0.569182	0.362165	0.35874	1.54524	1.36629
0.75653	0.325662	0.585328	1.88998	0.569631
1.18199	2.84436	0.964168	10.555	1.46877
1.03078	0.555707	1.15806	4.80245	1.27899
3.62509	1.60465	2.12622	6.95778	2.39162
1.40876	0.685558	0.70125	10.528	2.71555
0.767648	0.369912	0.479308	16.6673	1.62157
1.47923	120.841	1.02377	3.36586	3.02683
1.56538	172.586	0.821523	3.31496	2.80556
2.55604	211.609	1.39873	3.23906	2.58606
0.983185	93.0015	0.58174	39.5331	1.63309
0.73698	165.858	7.53005	5.20431	4.22996
0.938695	43.4854	9.96372	1.49085	1.38542
0.763189	81.6949	40.2503	1.78486	1.44144
1.36158	99.7473	1.12438	1.22956	2.038
1.05317	80.7835	0.575691	1.10425	1.0981
0.979709	111.219	0.475093	0.578597	1.73068
1.73028	127.607	0.80965	1.26106	1.35079
3.01298	80.6195	1.83373	4.14648	12.0977
5.25034	2.28544	2.18128	13.1224	23.6341
1.32022	111.91	3.4595	6.40339	5.48218
1.11279	37.0616	22.5412	3.28775	2.38591
0.804299	0.99079	0.500776	1.99092	0.633479
0.858433	69.1147	0.460758	2.32318	0.583496
0.825027	0.375642	0.464426	1.36364	0.284488
0.867289	0.394678	0.390487	6.04416	0.432367
0.504408	0.152119	0.455155	2.71874	0.450726
0.493587	0.255721	0.317632	0.617914	0.381281
1.30631	0.481786	0.724769	1.47298	0.662597
337.885	129.741	179.183	0.49502	211.053
4.40175	2.6033	0.688169	2.17689	0.903358
1.45608	0.629772	31.7878	2.26024	2.71434
14.4651	4.89679	7.26152	142.619	5.97444
6.41682	2.37558	5.44803	23.9734	7.05902
0.489857	16.6249	0.249375	1.01846	0.317376
1.18018	0.464384	0.455675	0.514222	0.471067
0.35136	0.131221	2.71826	1.65173	0.993514
0.225365	0.088813	0.186761	0.208739	0.237349
0.297338	0.820585	1.36196	0.190743	1.77768
1.30513	0.447694	1.92062	5.40495	2.77254
3.4717	1.23101	5.11104	4.87948	2.46608
158.524	54.7891	89.3149	207.277	100.099
2.48922	1.04257	1.44751	2.2533	1.75167
0.379479	2.25585	0.418731	7.52736	0.38466
1.49959	0.501445	5.26767	42.0762	7.24099
3.43924	1.98967	2.0614	11.8331	2.71508
4.23073	1.45305	2.543	0.593192	3.20326
1.87301	0.630884	3.20043	8.89385	4.78534
4.56172	1.50178	3.21767	18.8012	4.63883
2.67974	0.861676	0.341447	12.3291	0.560936
1.31507	0.997215	0.619156	4.19749	0.666827
1.84634	0.594084	6.09279	15.9766	0.38544
1.57473	0.481527	0.786665	0.69577	1.17514
0.693894	0.236257	0.549071	2.20691	0.938601
0.513747	0.168685	0.219603	0.674424	0.292436
0.412433	0.138233	0.287798	1.9396	0.33182
0.55167	0.33158	0.254458	0.441652	0.347084
0.187908	0.0644922	0.0974176	0.0744046	0.121183
1.42538	0.45851	0.814445	4.75477	0.899453
1.73223	0.519534	0.919757	3.02868	1.14191
0.802005	0.241037	0.446833	3.99665	0.552339
0.931762	0.286986	1.92575	0.745575	0.842064
8.8062	4.49164	2.13622	3.24689	2.8177
2.80826	1.0737	0.965265	2.92331	1.27361
1.90517	0.675364	2.27598	15.3751	3.45542
1.11657	0.337717	1.21743	1.9425	1.89777
0.544516	0.18995	0.25911	0.973813	0.423308
0.57021	0.173971	0.437782	6.53091	0.634018
0.984777	0.787867	0.463326	4.99739	0.999572
2.8346	28.0845	0.762347	5.08092	0.815126
0.567771	18.2881	0.323882	0.738489	0.342806
0.287138	26.9357	0.160155	0.35456	0.189777
0.8748	2.6644	0.870062	4.84956	0.585239
0.617542	1.6351	0.33553	1.06587	0.325129
0.941998	10.7553	2.79118	8.31027	4.66711
0.414335	5.60778	0.24357	3.62113	1.43613
2.13842	16.3399	0.46822	3.47607	2.00853
10.8489	4.48195	71.7614	9.17925	51.6127
9.03645	2.88963	9.16388	14.7201	19.6038
34.2413	2.0705	1.48857	2.01962	1.91908
1.1783	0.727233	0.435158	0.829526	0.47707
0.973461	0.388011	0.544369	3.82823	0.473641
3.86483	1.13073	17.3347	15.1529	21.884
73.2668	2.85652	12.8251	9.87994	30.0196
57.1579	34.0501	79.9244	27.037	20.7898
35.0503	10.6177	11.2875	50.823	18.3723
40.0841	5.39597	50.4963	12.0522	16.3687
36.8757	7.43493	1.20794	5.98899	3.50221
36.3787	2.85271	77.3651	11.1318	100.082
3.67829	1.33588	1.99483	12.7741	2.22181
0.621043	0.196561	0.265189	7.4104	0.383178
0.838213	0.261606	0.330188	8.15409	0.576533
0.54218	0.173362	0.289012	5.91698	0.372013
0.702915	0.214398	0.300871	0.517859	0.479799
0.798594	0.265396	0.384931	0.891584	0.526952
0.605033	0.199308	0.436143	0.201695	0.561049
1.0129	0.321552	0.680439	0.00898438	0.902917
0.609329	0.261205	0.328987	3.86849	0.434401
1.3325	0.426492	0.689857	2.10053	0.933342
0.562984	0.200801	0.282859	0.776114	0.39439
1.25822	1.07831	0.633653	7.12101	0.907315
1.02541	0.540473	0.406903	5.66732	0.661441
3.34616	0.971178	6.83582	2.48995	1.31809
2.69095	0.875346	1.69297	2.91848	1.61316
1.9443	0.769308	21.5432	0.594	0.423956
1.50755	0.561357	0.504809	0.326312	1.03906
0.729765	0.341067	0.35954	53.5366	0.524837
0.38478	0.139618	0.199915	3.33205	0.336992
0.614521	0.224886	0.305295	0.721712	0.428625
0.594361	0.824113	0.30332	0.207349	0.610731
0.212896	1.40739	0.125989	0.321273	0.150048
0.669383	0.251687	0.307467	0.498068	0.43362
1.11902	0.65698	42.2056	0.220696	0.511653
0.880936	0.43656	13.7249	1.58544	18.0973
0.991297	1.21825	30.2432	0.492166	40.2397
1.05264	0.929171	0.442502	1.11493	0.641073
1.02816	7.28043	128.043	0.168093	0.637365
4.27979	1.52314	180.031	0.311088	1.57737
3.30055	1.76855	15.2071	8.09939	6.2481
0.606554	0.919418	0.318813	1.10089	0.426327
0.426887	0.632495	0.22579	1.32198	0.3127
0.438656	1.23781	0.223226	0.201706	0.310889
0.240124	0.518765	0.116793	0.157312	0.167735
0.900784	0.816964	0.582716	0.220919	0.654936
0.29681	0.17775	0.172281	0.150058	0.219577
0.637022	0.770324	0.352222	0.0753582	0.463619
0.78033	1.29038	0.428784	0.113446	0.58445
0.654355	0.485037	0.33893	0.172145	0.44868
0.69878	0.469037	0.391159	0.483609	0.529161
0.451021	0.798356	19.7791	0.660251	0.315712
0.681266	0.44785	0.396688	0.632903	0.530189
1.82495	19.5272	0.987604	5.6059	1.33105
0.954789	3.12677	0.532493	1.41578	0.709238
0.716015	1.9457	390.382	0.519501	0.482154
0.340238	0.779797	12.4947	0.328461	0.264436
0.275228	0.733825	53.945	4.40285	0.241303
0.800341	1.97688	0.403095	8.27492	0.632661
1.01009	2.17212	0.558128	29.0646	0.773658
0.34525	0.176971	0.186176	30.8997	0.258398
0.983639	0.477377	0.541286	17.5107	0.783785
0.584972	1.82227	0.274598	10.9313	0.561743
0.504944	1.92422	0.32061	0.680176	0.575435
0.94758	126.759	0.520637	1.86412	0.708579
0.455422	0.291635	0.229166	0.941134	0.322432
0.418822	22.1246	0.21343	0.419199	0.424158
0.403953	0.216277	0.368382	1.35032	0.600053
0.457518	0.242694	0.53822	1.44187	1.25847
0.417019	0.170035	0.206775	0.96121	0.223525
0.287413	0.448283	0.181291	0.658618	0.559087
0.309818	0.866495	0.173805	0.550348	0.47507
0.489288	0.261531	0.2931	0.538405	0.384674
0.303399	0.174454	0.225819	0.38471	0.329537
1.00616	0.541684	0.642617	1.2556	0.872332
0.271609	0.176813	0.315148	0.329837	0.711228
0.0836499	0.0725229	0.0785331	5.32666	0.233163
0.758015	1.23575	0.421227	1.41412	0.727108
0.259305	1.41215	0.118386	0.343263	0.246317
0.465738	0.281773	0.222482	2.4321	0.406791
0.503759	0.292904	0.24628	0.826744	0.55772
0.389294	0.225459	0.228784	1.98468	0.695825
0.147344	0.392359	0.131237	0.300438	0.101475
1.0516	0.609467	0.531233	2.02289	0.780082
0.167851	0.106368	0.100183	9.00549	0.140342
0.0766914	0.0836204	0.0471113	0.0581928	0.0629126
0.270224	0.149254	0.241929	0.403587	0.243606
0.283652	0.169641	0.179773	0.49694	0.294158
0.423921	0.250323	0.258698	0.302751	0.350195
0.156258	0.109216	0.0994282	0.281859	0.130598
0.493478	0.303175	0.292772	6.95014	0.392989
0.0832417	0.0629308	0.060645	0.131633	0.0730665
0.643694	0.722765	0.380776	6.4186	0.508559
0.235625	0.16962	0.136632	1.39775	0.204077
0.362763	0.45293	0.175032	1.80254	0.357469
0.219518	0.137206	0.130556	1.73779	0.275301
0.809237	122.957	0.433294	1.16848	0.601266
1.40854	0.903677	1.17382	6.95731	1.62455
1.2252	0.796812	0.999695	6.18321	1.52026
0.906868	0.800351	0.500404	8.91739	0.754054
1.12846	0.78649	0.667617	5.52439	0.915996
0.296085	0.422945	0.145379	0.648709	0.212581
0.0598193	0.0647075	0.0471219	0.176992	0.127501
1.43974	1.12545	0.819851	18.5619	1.28883
0.6626	0.549295	27.9573	21.4589	4.40838
1.98947	2.05512	99.2839	66.2357	2.1456
0.532782	0.360171	83.918	9.49499	0.716288
0.480661	0.460093	0.303373	1.76628	0.534681
1.00918	1.31404	0.687629	1.60059	0.832129
0.898521	0.644898	0.494003	1.42815	0.725801
1.18881	1.81963	0.559416	4.6628	0.758637
1.28536	0.885433	0.900732	4.83154	0.895003
0.55739	0.684464	0.358128	51.1232	0.650947
14.4667	0.978661	1.74229	15.2381	1.52091
2.63321	6.3794	0.952252	6.40972	1.45678
0.48253	1.90965	0.282817	10.8458	0.379249
0.116222	0.0840814	85.959	3.62624	0.345314
0.422919	0.297928	0.250997	0.608289	0.383605
0.486609	1.43893	2.68363	15.6802	0.551332
2.01902	1.39517	1.14443	7.56865	1.44944
1.09607	1.39332	0.842171	12.5424	1.17899
1.58153	1.26687	1.43935	57.2791	1.95741
1.47319	0.793716	0.919442	23.4151	1.14141
0.674523	1.05021	0.337086	8.68622	0.512299
1.8042	1.12882	31.1661	22.0929	40.5522
0.588396	0.328621	6.33141	30.7085	8.24684
0.362398	126.119	0.460162	19.0862	0.947591
0.221975	3.31266	0.246445	3.04348	0.36147
0.218466	2.26376	0.172721	0.179142	0.220659
0.122218	1.60961	0.17979	2.91151	0.22284
0.211943	1.49289	0.222149	0.424407	0.187215
0.418338	0.641171	0.197671	0.747332	0.515673
0.313166	233.65	0.198111	0.599314	0.509714
1.54417	113.708	0.935278	8.85354	1.30801
1.51016	242.549	0.764649	8.34688	1.4485
0.599051	1.80354	0.392648	8.67434	0.965583
0.443896	0.288202	0.261219	5.50549	0.364584
0.30781	0.249787	0.228526	8.05929	0.708912
0.610151	0.396892	0.332966	4.34388	0.511181
0.898418	2.31166	0.453724	7.19732	1.273
1.14747	0.585211	0.691669	11.2177	1.2132
1.31287	1.05254	0.534317	10.7679	1.07862
0.621315	0.385723	1.41229	11.2399	0.722128
0.746615	0.485811	0.434731	14.9829	0.544015
0.265901	0.219207	0.709963	19.0838	0.809914
1.27967	0.838172	1.03863	11.5207	1.6244
1.07028	0.667984	1.12991	12.8058	1.09411
1.00012	0.725353	0.521435	1.84451	1.15267
[truncated: 1,778 more rows]
