# Supplementary material for: Are multifractal processes suited to forecasting electricity price volatility? Evidence from Australian intraday data
Source: publisher site journal article supplement (doi:10.1515/snde-2019-0009), 2020-11-17
Supplement: Supplementary file 2 [file elec_bernd.xls]

## Sheet: returns
NSW	QLD	SA	TAS	VIC	Date
-0.976354	-0.132021	-0.686362	-0.0122004	-0.413568	2006-01-01
0.992417	2.35731	0.217948	0.0359663	0.220717	2006-01-02
-0.950766	-2.24942	-0.118074	0.0548014	-0.128864	2006-01-03
-0.0258264	-0.0529559	0.14452	1.27958	0.0252489	2006-01-04
0.0243102	0.0163142	-0.0693036	-1.32483	0.0488518	2006-01-05
-0.0644869	-0.110005	0.0613174	-0.0254431	-0.0564979	2006-01-06
0.0250309	0.0265557	0.939201	-0.0325921	0.0358303	2006-01-07
0.19444	0.14815	-0.0463749	0.118728	0.267962	2006-01-08
0.510627	0.29724	-0.388251	-0.0693112	0.448642	2006-01-09
-0.0365025	-0.174891	-0.405136	0.00405187	-0.40562	2006-01-10
-0.23259	0.117736	0.112735	-0.0754463	0.122095	2006-01-11
-0.238668	-0.215587	-0.162631	0.0166221	-0.19827	2006-01-12
0.0568272	-0.0434878	-0.0366041	-0.032014	-0.0121437	2006-01-13
-0.288229	-0.152654	-0.260504	0.649243	-0.296311	2006-01-14
0.130442	0.101864	1.72581	-0.480723	0.203676	2006-01-15
0.031781	0.0483854	-1.07132	-0.114686	0.049158	2006-01-16
-0.124524	-0.0969806	-0.302436	-0.0148667	-0.0989896	2006-01-17
0.246856	0.189234	2.58545	-0.0242606	2.57932	2006-01-18
0.070684	-0.00738193	-0.0324788	0.0260923	0.17494	2006-01-19
0.718907	0.388247	-0.212078	-0.0502711	-1.51571	2006-01-20
-0.228114	0.0857483	-0.810285	0.834159	0.334365	2006-01-21
1.06734	1.08756	0.323045	-0.801881	0.570998	2006-01-22
-1.55347	-0.0363772	-1.65903	0.00785403	-1.80491	2006-01-23
0.0184241	-1.32507	0.46524	0.0362019	0.37793	2006-01-24
0.010007	-0.147769	2.06384	-0.0202391	2.2804	2006-01-25
0.525896	0.550433	-2.03866	0.00937231	-2.08283	2006-01-26
-0.689943	-0.694487	-0.625053	-0.0745125	-0.77753	2006-01-27
0.087112	0.0500175	-0.0211721	-0.00291203	0.143123	2006-01-28
0.160192	0.172627	0.0657569	0.0493806	0.0430647	2006-01-29
-0.223317	-0.155254	-0.0307832	0.0241145	-0.0929949	2006-01-30
0.746832	0.748351	0.480312	-0.0211474	0.604016	2006-01-31
3.35018	3.08098	0.00916259	-0.0153381	0.0244362	2006-02-01
-4.03283	-3.7144	-0.488307	0.0317431	-0.58566	2006-02-02
-0.267063	-0.215853	-0.358366	-0.0613452	-0.368534	2006-02-03
0.0360898	0.0405435	0.106076	-0.00122205	0.0285158	2006-02-04
0.615743	0.543121	0.296175	0.0243744	0.40065	2006-02-05
-0.640363	-0.5666	-0.336479	0.872041	-0.368696	2006-02-06
-0.0150141	-0.0418491	0.133589	-0.874308	0.0376904	2006-02-07
0.0864709	0.0540539	-0.0982373	-0.00634181	0.00479952	2006-02-08
-0.0708038	0.00101458	-0.0143535	-0.00789856	-0.0700759	2006-02-09
-0.0541482	-0.0815651	-0.134229	-0.0182732	-0.0993789	2006-02-10
0.0589865	0.0218565	-0.00258673	-0.011735	0.0459066	2006-02-11
0.0855277	0.194667	0.24086	0.0753454	0.161777	2006-02-12
0.000157382	-0.079979	0.045736	0.047435	0.0497316	2006-02-13
0.128664	0.0791194	0.186741	-0.0233616	0.181553	2006-02-14
0.14451	0.152024	0.448165	0.0319785	0.269197	2006-02-15
0.429084	0.384599	-0.0603412	-0.0766028	0.291964	2006-02-16
-0.387712	-0.336834	-0.43565	-0.00932994	-0.532027	2006-02-17
-0.113563	0.883059	-0.357833	-0.0105232	-0.357302	2006-02-18
-0.0295746	-0.79504	0.217915	0.0588322	0.208856	2006-02-19
0.12125	-0.0760089	0.150749	0.0668396	0.187352	2006-02-20
-0.082911	-0.122617	0.000807825	-0.0100887	-0.0292441	2006-02-21
0.0539317	0.0280891	1.95003	-0.0896998	2.68103	2006-02-22
0.274971	0.230139	-1.11057	-0.0136824	0.6556	2006-02-23
-0.586976	-0.526181	-1.18297	0.00387443	-3.68359	2006-02-24
-0.0806578	-0.05158	-0.214061	-0.0350247	-0.201477	2006-02-25
0.121529	0.0864265	0.364782	0.0303296	0.268512	2006-02-26
0.186534	0.173085	0.120697	0.0018285	0.188793	2006-02-27
-0.116906	-0.18475	-0.0569925	0.0249876	-0.0946816	2006-02-28
0.256248	0.214913	0.416444	-0.166447	0.338763	2006-03-01
0.198741	0.205476	0.269997	0.425495	0.38824	2006-03-02
-0.299829	-0.27757	-0.45759	-0.511338	-0.487066	2006-03-03
-0.0911774	-0.025093	-0.183433	-0.129121	-0.178131	2006-03-04
0.282475	0.325974	0.116743	0.142631	0.184423	2006-03-05
-0.222211	-0.225397	-0.126324	-0.164716	-0.160771	2006-03-06
0.132402	0.503278	0.142937	0.150669	0.148934	2006-03-07
0.229478	-0.112674	0.200103	0.297479	0.200975	2006-03-08
-0.156993	-0.18769	-0.0969374	-0.0121544	-0.136751	2006-03-09
-0.227071	-0.297641	-0.171564	-0.215853	-0.218645	2006-03-10
0.093761	0.0139209	-0.00404924	0.0918914	0.0853212	2006-03-11
0.137305	0.137262	-0.0583679	-0.106849	-0.032789	2006-03-12
-0.215324	-0.162079	0.0363905	0.0356057	0.0103577	2006-03-13
0.0372203	0.0402758	0.0208904	0.0336685	0.0329773	2006-03-14
0.0599708	-0.103675	0.00139865	-0.000239546	0.00341133	2006-03-15
-0.0757403	0.0348615	0.0507793	-0.0289456	-0.0128611	2006-03-16
-0.226305	-0.216249	-0.281666	-0.171645	-0.280014	2006-03-17
0.00596061	-0.00544573	0.0947903	-0.019564	-0.077398	2006-03-18
0.151705	0.11774	0.184981	0.137175	0.310889	2006-03-19
0.0673904	0.0616689	0.00508141	0.0473829	0.0836408	2006-03-20
0.0807234	-0.0826125	0.870024	0.102414	0.253211	2006-03-21
0.00657473	0.0338503	-0.736503	0.00487534	-0.164609	2006-03-22
-0.205839	-0.0971019	-0.0589298	0.239782	-0.208185	2006-03-23
-0.155674	-0.161289	0.642374	-0.0995097	-0.179953	2006-03-24
0.00810178	0.0303312	-0.824	-0.403837	-0.00591778	2006-03-25
0.0859804	0.168937	0.0839095	-0.0658073	0.110214	2006-03-26
0.0259483	-0.0325102	0.0164728	1.10749	0.00881448	2006-03-27
0.160599	-0.0517873	0.121594	-0.861011	0.196681	2006-03-28
-0.00208174	0.137626	-0.0752837	-0.0460421	-0.0282924	2006-03-29
-0.0305851	0.063889	0.00935336	-0.0356427	-0.00487726	2006-03-30
-0.133382	-0.105068	-0.00937846	0.00824419	-0.123442	2006-03-31
-0.0866893	-0.0726355	-0.115203	0.247235	-0.139108	2006-04-01
0.261507	0.303768	0.711853	0.140575	0.314352	2006-04-02
0.0333869	1.76366	-0.527047	-0.0703912	-0.0238622	2006-04-03
-0.0836408	-1.554	-0.111931	0.138948	-0.0582597	2006-04-04
-0.0243009	-0.399174	0.00480886	-0.117637	0.0451956	2006-04-05
-0.004727	-0.0476614	0.0178431	-0.0974016	-0.025968	2006-04-06
-0.0668312	-0.115951	-0.0340958	-0.00179913	-0.0610736	2006-04-07
-0.0676192	0.0358171	-0.0743056	1.14471	-0.0998668	2006-04-08
0.0254205	0.0755991	0.851634	-1.10497	0.968334	2006-04-09
0.088556	-0.0698906	-0.881713	0.0300225	-0.91615	2006-04-10
0.0987215	0.258194	0.176113	0.0134323	0.0977143	2006-04-11
-0.0257654	-0.0896783	-0.0398655	-0.0818222	0.0269407	2006-04-12
-0.226483	-0.192201	-0.102157	-0.0368861	-0.242166	2006-04-13
-0.0466414	-0.00322722	-0.00735226	-0.000290766	-0.0678019	2006-04-14
-0.0075255	0.0349666	-0.123277	-0.00684484	-0.0142848	2006-04-15
-0.00691085	-0.0101957	0.00787816	0.0874827	-0.0320384	2006-04-16
0.0862469	0.13259	0.0361275	-0.0930469	0.0888047	2006-04-17
0.0687567	0.0719345	0.0016042	0.0445031	0.073148	2006-04-18
0.230594	0.272194	0.206047	0.00347824	0.246129	2006-04-19
-0.014843	-0.0362013	0.0338978	0.0154255	0.0232046	2006-04-20
0.138906	0.0561078	0.114908	0.0106772	0.117084	2006-04-21
-0.287412	-0.311982	-0.273091	-0.0698664	-0.322197	2006-04-22
0.01151	0.00936463	0.063738	-0.120002	0.0825593	2006-04-23
-0.12563	-0.148394	-0.190923	0.0265724	-0.232567	2006-04-24
0.252673	0.271933	0.275738	0.0414191	0.33016	2006-04-25
-0.0434519	-0.0560569	-0.0705234	-0.0729991	-0.0614696	2006-04-26
0.0141118	0.0246259	0.0157239	-0.0178604	0.0186691	2006-04-27
-0.121762	-0.111882	-0.146139	-0.26987	-0.150483	2006-04-28
0.0164513	0.0195012	0.0502322	0.00705096	0.0360585	2006-04-29
-0.050797	-0.0670171	0.0637873	0.125568	0.00878486	2006-04-30
-0.0337056	-0.0151844	-0.113051	-0.0551598	-0.0685212	2006-05-01
0.0298571	0.0176479	0.0438128	0.019372	0.0609179	2006-05-02
0.0134515	0.0594407	0.0178202	-0.0468333	0.00446085	2006-05-03
0.0390643	-0.0626955	0.0818087	0.0242661	0.0767216	2006-05-04
-0.0803855	-0.0408308	0.0323158	-0.0428642	-0.102617	2006-05-05
0.107535	0.145457	0.251223	0.100937	0.113649	2006-05-06
0.284777	0.271436	1.18082	0.406698	0.402687	2006-05-07
-0.0736495	-0.0738457	-1.29276	-0.147118	-0.180589	2006-05-08
-0.130218	-0.104304	0.0657398	-0.0661416	-0.149253	2006-05-09
-0.0598853	-0.0504248	0.0181309	0.00688171	-0.065378	2006-05-10
-0.150608	-0.18368	-0.184688	-0.275922	-0.153517	2006-05-11
-0.0293134	-0.0473491	-0.156487	-0.183229	-0.0893115	2006-05-12
-0.0111544	0.0516137	-0.0175713	0.232831	-0.0567477	2006-05-13
0.0635654	0.0255272	0.152764	0.206525	0.145138	2006-05-14
0.0136946	0.00974408	-0.017164	-0.0241543	-0.00926417	2006-05-15
-0.0234158	-0.0501051	0.0350334	-0.00491488	-0.0563631	2006-05-16
0.0364346	0.0453157	-0.0282361	0.603818	0.0963437	2006-05-17
-0.010152	0.0014907	-0.0663601	-0.83605	-0.039342	2006-05-18
0.0809794	0.0977525	-0.0236373	-0.0395421	0.0982259	2006-05-19
-0.0379896	0.00702018	-0.0334685	-0.00301172	-0.0283894	2006-05-20
0.353103	0.277713	0.365305	0.491822	0.390198	2006-05-21
0.261587	0.298392	1.16871	1.82002	1.205	2006-05-22
-0.443028	-0.435658	-0.527403	-2.12956	-1.44748	2006-05-23
0.0239196	0.0215942	-0.726664	-0.0141368	0.0210583	2006-05-24
-0.0166079	-0.0435032	-0.0609023	0.00686243	-0.0155654	2006-05-25
0.0449706	0.0407601	0.0101554	0.0251264	0.0456457	2006-05-26
0.0588977	0.0926754	0.0607599	-0.0110192	0.00694886	2006-05-27
1.08202	1.12791	0.835324	0.97246	0.97251	2006-05-28
-0.413802	-0.471675	-0.427554	-0.415581	-0.417985	2006-05-29
-0.412025	-0.37957	-0.179371	-0.0357723	-0.228002	2006-05-30
-0.282887	-0.295932	-0.247826	-0.300258	-0.218995	2006-05-31
0.108642	0.0719904	0.0658436	0.119613	0.0787929	2006-06-01
-0.143053	-0.118564	-0.180451	-0.175518	-0.194192	2006-06-02
0.0173078	0.0356069	0.0239665	-0.0423758	-0.00485942	2006-06-03
0.348819	0.233247	0.324241	0.883681	0.354672	2006-06-04
-0.194959	-0.17858	-0.0984269	-0.744928	-0.150882	2006-06-05
-0.0493993	0.016228	0.127101	-0.0280039	-0.00054778	2006-06-06
-0.0298766	-0.0312142	-0.156613	0.0427822	0.0176522	2006-06-07
-0.0332537	-0.0688732	-0.0304433	0.70117	-0.0347824	2006-06-08
-0.03345	0.0152808	-0.0354462	-0.673224	0.0140158	2006-06-09
0.106721	0.0671605	-0.0688612	-0.0727663	-0.0567486	2006-06-10
-0.0296859	-0.0586911	0.0263608	0.0163047	-0.00632563	2006-06-11
0.0918029	0.0633829	0.231579	0.140429	0.175166	2006-06-12
0.246091	-0.0803084	0.18585	0.134397	0.209138	2006-06-13
-0.0164133	-0.0571203	0.027617	0.000531954	-0.0291253	2006-06-14
-0.052225	-0.126427	-0.0824169	-0.0441312	-0.0564832	2006-06-15
-0.0782898	0.02178	-0.207032	-0.147258	-0.156693	2006-06-16
-0.124291	0.116178	-0.097364	-0.0426347	-0.112995	2006-06-17
0.192623	0.167899	0.422279	0.44528	0.396863	2006-06-18
-0.0657571	0.0531222	-0.0191007	0.754888	-0.101457	2006-06-19
0.0210251	0.0673416	-0.117294	-1.02413	-0.0672092	2006-06-20
-0.105324	-0.0617801	-0.205825	-0.0932501	-0.104901	2006-06-21
-0.0594276	-0.117988	-0.0311284	-0.077151	-0.03715	2006-06-22
-0.0941022	-0.0963741	-0.0979739	-0.0800807	-0.0865884	2006-06-23
0.0536461	0.0806002	-0.0667301	-0.0788339	-0.08146	2006-06-24
0.179028	0.115177	0.293934	0.370016	0.280499	2006-06-25
0.0070302	-0.109096	0.118206	0.0446545	0.0830544	2006-06-26
-0.0688376	-0.109848	-0.205854	-0.0780835	-0.127563	2006-06-27
0.127281	0.369677	0.103463	-0.0377627	0.0995665	2006-06-28
0.0906134	0.0843279	0.0336423	0.648769	0.0499576	2006-06-29
0.0515587	-0.12342	0.0353614	-0.612039	-0.0534135	2006-06-30
-0.236563	-0.182301	-0.129713	-0.128206	-0.239083	2006-07-01
0.553802	0.186114	0.581626	0.899095	0.634046	2006-07-02
-0.57276	-0.258103	-0.488442	-0.872299	-0.501466	2006-07-03
-0.14239	-0.178552	-0.20087	-0.127175	-0.173081	2006-07-04
0.0803175	0.073691	0.143772	0.0809546	0.0815607	2006-07-05
0.202028	-0.0662525	0.156533	0.157422	0.194638	2006-07-06
0.0516968	0.0282018	-0.111546	-0.145029	-0.201947	2006-07-07
-0.101781	0.170055	-0.154676	-0.0669957	0.0187254	2006-07-08
0.228469	0.0620145	0.244461	0.227322	0.304097	2006-07-09
0.000781254	-0.047621	0.0967635	0.0613268	0.0729451	2006-07-10
-0.157042	-0.0839962	0.0426254	-0.094709	-0.109489	2006-07-11
0.145625	0.180517	0.00716744	0.0910543	0.121522	2006-07-12
-0.0570817	-0.0377558	-0.0732885	0.023877	-0.0285689	2006-07-13
-0.152713	-0.229934	-0.266223	-0.294749	-0.283116	2006-07-14
-0.383294	-0.0203288	-0.368637	-0.161296	-0.398231	2006-07-15
0.138308	0.140047	0.226611	0.0754116	0.254328	2006-07-16
0.123702	0.0531245	0.1299	0.178857	0.118524	2006-07-17
1.96252	0.389392	1.48624	1.60857	1.74974	2006-07-18
0.0249833	1.50097	-0.234958	0.00124096	-0.0154155	2006-07-19
-1.86746	-2.05068	-1.17457	-1.46203	-1.58879	2006-07-20
-0.0839792	0.140388	-0.111236	-0.0758914	-0.128753	2006-07-21
0.000967742	0.0355335	0.0653006	-0.045414	-0.0125821	2006-07-22
0.58115	0.625072	0.319183	0.400598	0.510813	2006-07-23
-0.61007	-0.679668	-0.284934	-0.381149	-0.428522	2006-07-24
-0.028	0.00507687	-0.039078	-0.0880673	-0.0711532	2006-07-25
-0.0691522	0.0257689	-0.0834491	0.0673098	-0.0633014	2006-07-26
-0.102756	-0.176055	-0.125356	-0.0839293	-0.108582	2006-07-27
-0.0899476	-0.159852	-0.000351562	0.0235162	-0.138263	2006-07-28
-0.054983	0.0709924	0.371247	-0.0441951	-0.092664	2006-07-29
0.506332	0.256203	0.117738	0.251201	0.583585	2006-07-30
-0.16056	0.0470724	-0.0649978	-0.103747	-0.0748838	2006-07-31
0.212861	0.208454	-0.056002	0.0383848	0.0308621	2006-08-01
-0.173377	-0.168598	-0.0786219	-0.137599	-0.115136	2006-08-02
0.133682	0.0338606	0.104884	0.0684215	0.0818355	2006-08-03
-0.202282	-0.197343	-0.13105	-0.0893988	-0.211728	2006-08-04
-0.0390841	0.0391018	0.127032	0.0798981	-0.0418208	2006-08-05
0.313618	0.391344	0.0376906	0.153046	0.392513	2006-08-06
-0.232976	-0.21034	-0.279181	-0.161947	-0.240286	2006-08-07
-0.0621218	-0.0815337	-0.085904	0.00297222	-0.0736123	2006-08-08
0.0448483	0.0543919	0.179598	0.0267809	0.0588817	2006-08-09
-0.173559	-0.154152	-0.269486	-0.170003	-0.199611	2006-08-10
-0.0426381	-0.0555769	-0.0694237	-0.130743	-0.0790068	2006-08-11
-0.144185	-0.124461	-0.215781	-0.0242328	-0.190323	2006-08-12
0.120801	0.117399	0.218342	0.133006	0.20702	2006-08-13
0.0682799	0.0979605	0.0323249	0.0152562	0.0361918	2006-08-14
-0.0672841	-0.100831	-0.0320301	-0.0644836	-0.0392975	2006-08-15
-0.0131665	0.0188205	0.00713633	0.0291702	0.00112269	2006-08-16
0.0446372	0.0394322	0.96063	0.71728	0.0942921	2006-08-17
-0.0283826	-0.0735067	-0.931685	-0.712767	-0.0855234	2006-08-18
-0.0980936	-0.0807966	-0.244571	-0.0864304	-0.155796	2006-08-19
0.233573	0.188574	0.309208	0.12252	0.304475	2006-08-20
0.0893441	0.0267726	0.121017	-0.0019321	0.123793	2006-08-21
0.00360825	0.0446632	0.0702674	0.0667215	0.0290216	2006-08-22
0.208475	0.0630107	0.177397	0.126476	0.182932	2006-08-23
-0.128694	-0.443767	-0.0701127	-0.0707452	-0.105845	2006-08-24
-0.196006	0.0344304	-0.206067	-0.101177	-0.239203	2006-08-25
-0.191467	0.0432066	-0.215086	-0.042878	-0.19285	2006-08-26
0.29407	0.276796	0.322107	0.124208	0.326515	2006-08-27
0.0323964	0.0785479	-0.0167723	0.0195029	0.0297834	2006-08-28
-0.108202	-0.238696	-0.0940425	0.00802138	-0.0890312	2006-08-29
0.0772872	0.28934	-0.0140925	0.00200741	0.0365132	2006-08-30
-0.177393	-0.359923	-0.207828	-0.0698214	-0.226798	2006-08-31
-0.28725	-0.0914801	-0.280206	0.00524225	-0.337438	2006-09-01
-0.0567307	-0.0337021	-0.0788212	-0.215017	-0.0857258	2006-09-02
0.280477	0.225858	0.403431	0.0742934	0.400491	2006-09-03
0.0171025	-0.0441581	0.0221995	0.125663	0.0412515	2006-09-04
0.205529	-0.00287831	0.313027	0.186838	0.20954	2006-09-05
0.162453	0.173272	-0.024241	0.0692338	0.0996429	2006-09-06
-0.246365	-0.120534	-0.19882	-0.140204	-0.184458	2006-09-07
0.322967	-0.182354	0.247247	0.207029	0.224859	2006-09-08
-0.220563	0.0904919	-0.182696	-0.140056	-0.202492	2006-09-09
0.684938	0.129272	0.552179	0.437936	0.66347	2006-09-10
-0.415892	-0.298454	-0.437809	-0.330545	-0.382052	2006-09-11
-0.12233	-0.0468808	-0.0533238	0.0442396	-0.116521	2006-09-12
-0.217018	0.0127015	-0.0617722	-0.139406	-0.148325	2006-09-13
0.126265	0.0486224	0.0439493	0.169433	0.0887678	2006-09-14
-0.183046	-0.00899909	-0.129797	-0.0291252	-0.210205	2006-09-15
-0.271043	-0.0493841	-0.308381	-0.0104027	-0.294671	2006-09-16
0.179072	0.0844846	0.245138	0.0397779	0.302459	2006-09-17
0.0234176	-0.0518537	-0.0803178	-0.108623	0.0165495	2006-09-18
0.14773	0.117459	0.128727	-0.0518093	0.0902721	2006-09-19
-0.155314	0.141188	-0.0831401	-0.0474894	-0.118387	2006-09-20
-0.114231	-0.234368	-0.0743059	-0.116704	-0.0988411	2006-09-21
-0.120388	-0.0678449	-0.148152	-0.0897834	-0.171019	2006-09-22
0.123232	0.0336048	0.120559	0.0388203	0.133366	2006-09-23
0.318085	0.333878	0.317084	0.168206	0.411996	2006-09-24
-0.234056	-0.157702	-0.217023	-0.273938	-0.242717	2006-09-25
0.0632077	0.154439	0.0512783	0.0244507	0.0531366	2006-09-26
0.058204	-0.151242	0.0444036	-0.00264702	-0.0312249	2006-09-27
-0.219213	-0.0176667	-0.181531	-0.245245	-0.208896	2006-09-28
-0.146488	-0.11271	-0.172169	-0.327635	-0.216446	2006-09-29
-0.106639	-0.0648232	-0.15559	-0.119975	-0.169203	2006-09-30
0.0940769	0.0735114	0.0978986	0.255608	0.181715	2006-10-01
0.171592	0.118229	0.2273	0.207683	0.20413	2006-10-02
-0.0527168	-0.0542445	0.0221539	-0.00148367	-0.012741	2006-10-03
0.0422749	0.0420281	0.0140823	0.119034	0.027959	2006-10-04
0.0178951	-0.00523027	0.037767	0.0579641	0.0643675	2006-10-05
-0.188939	-0.174064	-0.147163	-0.0973332	-0.287535	2006-10-06
-0.0983911	-0.0549616	-0.303327	-0.199664	-0.175418	2006-10-07
0.26203	0.200312	0.390243	0.148838	0.382297	2006-10-08
0.16795	0.156564	0.0866151	0.128674	0.143503	2006-10-09
-0.0117022	-0.167939	-0.0981983	0.0933158	-0.0847086	2006-10-10
0.400087	0.52483	0.607453	0.326708	0.492824	2006-10-11
0.0455119	-0.22103	-0.230109	0.0198958	-0.0101603	2006-10-12
-0.193302	-0.259844	-0.13682	-0.0799655	-0.157272	2006-10-13
-0.351397	0.0524055	-0.179893	-0.15092	-0.307973	2006-10-14
0.315442	0.305946	0.324423	0.145079	0.291437	2006-10-15
-0.0542597	-0.0982206	-0.0687488	-0.0240994	-0.025909	2006-10-16
-0.0879213	-0.135137	-0.19397	-0.161885	-0.142726	2006-10-17
-0.0781007	-0.101282	-0.0117096	0.0604696	-0.0498337	2006-10-18
0.0233384	-0.12338	-0.0297386	0.0733554	-0.00479298	2006-10-19
-0.257361	-0.064094	-0.138278	0.0633563	-0.203623	2006-10-20
-0.0432022	0.00378787	-0.0516499	0.104151	-0.0894945	2006-10-21
0.255104	0.079594	0.235306	-0.103419	0.300894	2006-10-22
0.0622442	0.0316476	0.0464302	0.0463946	0.064764	2006-10-23
-0.123208	-0.0611069	-0.145355	-0.00507479	-0.133634	2006-10-24
0.103917	0.0787521	0.104975	-0.0680168	0.076903	2006-10-25
0.12999	0.183842	0.0652958	-0.0192481	0.100658	2006-10-26
-0.067729	-0.212212	0.024403	-0.0322051	-0.0643593	2006-10-27
-0.259371	0.0249204	-0.22912	-0.107976	-0.276804	2006-10-28
0.0171294	-0.0316016	0.0396173	0.102968	0.0872804	2006-10-29
0.1117	0.0868501	0.0778521	-0.000449512	0.0844139	2006-10-30
-0.0637626	-0.0531979	0.0647031	-0.0290124	0.0603023	2006-10-31
0.140278	0.173348	-0.00318281	-0.0401656	0.0565195	2006-11-01
-0.0353473	-0.0230597	-0.0479817	0.000835808	-0.053713	2006-11-02
0.0302742	-0.159856	-0.0392593	-0.00990798	-0.0336759	2006-11-03
-0.135832	-0.00685042	-0.124789	0.00435108	-0.156248	2006-11-04
0.0748924	0.123058	0.112166	0.00702038	0.114679	2006-11-05
0.0956762	0.110107	0.0423028	0.0255796	0.0132885	2006-11-06
0.320844	0.201658	0.205928	0.117272	0.304914	2006-11-07
-0.348122	-0.314655	-0.221497	-0.0618158	-0.270002	2006-11-08
-0.0215274	-0.0728615	0.0531947	0.00403173	0.0255007	2006-11-09
-0.0191329	-0.113582	0.966542	0.0623941	-0.0509102	2006-11-10
-0.168496	0.0333691	-0.974146	-0.0788769	-0.181351	2006-11-11
0.181457	0.0798491	0.06304	-0.00125555	0.186775	2006-11-12
-0.0179752	-0.0705563	-0.0638324	-0.000360819	-0.0173237	2006-11-13
-0.0512877	0.1697	-0.0995748	0.0108426	-0.00994094	2006-11-14
-0.0936218	-0.167476	-0.0393336	0.00905331	-0.0517316	2006-11-15
-0.0941957	-0.0538789	-0.112049	-0.0268306	-0.141033	2006-11-16
-0.0403967	-0.0208596	-0.0269647	-0.237965	-0.0814371	2006-11-17
0.0523421	0.0254372	0.0740319	0.0461363	0.083173	2006-11-18
0.876899	0.581235	0.849408	0.57517	0.897036	2006-11-19
0.663389	0.617454	-0.194387	-0.0750524	0.556045	2006-11-20
-0.258542	0.0715162	-0.0184574	0.0413902	-0.478842	2006-11-21
-0.763949	-0.605755	-0.277127	-0.269471	-0.494025	2006-11-22
-0.105417	-0.175483	-0.0101333	0.0263474	-0.0551361	2006-11-23
0.222123	0.158874	0.189241	0.051005	0.173655	2006-11-24
-0.445677	-0.404651	-0.43313	-0.211569	-0.447282	2006-11-25
0.249403	0.155365	0.410306	0.189937	0.317088	2006-11-26
0.352479	0.418608	0.639777	0.154068	0.216129	2006-11-27
-0.469576	-0.0869957	-0.962866	-0.211535	-0.47934	2006-11-28
-0.262949	-0.598971	0.223593	0.166877	-0.163794	2006-11-29
0.438041	0.380908	-0.140018	0.0343789	0.317901	2006-11-30
-0.433026	-0.430305	-0.284088	-0.329967	-0.376597	2006-12-01
-0.242355	-0.187388	-0.27325	-0.197295	-0.274876	2006-12-02
0.118998	0.0707052	0.243182	0.213916	0.246599	2006-12-03
0.277025	0.237877	0.665439	0.177344	0.548181	2006-12-04
-0.0561377	-0.0221237	-0.512336	-0.230688	-0.308637	2006-12-05
0.0541423	-0.00978355	0.0836185	0.134563	0.0507073	2006-12-06
0.0750026	0.145807	2.41128	0.0760436	0.100498	2006-12-07
-0.0112941	-0.235451	-1.68822	0.00995942	0.107111	2006-12-08
-0.119271	0.0891843	-0.680453	0.0294641	-0.181176	2006-12-09
0.0569114	0.0985924	-0.202738	0.0667325	-0.145007	2006-12-10
-0.343943	-0.273531	-0.184229	-0.28229	-0.245551	2006-12-11
0.0876141	0.083293	0.161676	0.0226114	0.0900029	2006-12-12
0.391869	0.368978	0.188333	0.318452	0.299747	2006-12-13
-0.400778	0.667775	-0.331237	-0.369748	-0.371742	2006-12-14
-0.115547	-1.18742	-0.101917	-0.169207	-0.153778	2006-12-15
-0.11109	-0.111148	-0.0687668	0.0162641	-0.125397	2006-12-16
0.22847	0.210825	0.524934	0.307563	0.577123	2006-12-17
0.174269	0.160604	-0.10089	0.00723141	-0.113097	2006-12-18
-0.0139565	-0.0122945	0.522368	0.010696	0.00338433	2006-12-19
0.441947	0.177197	-0.0729067	0.127609	0.484884	2006-12-20
-0.483804	-0.252226	-0.548848	-0.275179	-0.508839	2006-12-21
-0.220904	-0.198854	-0.288833	-0.277483	-0.326742	2006-12-22
-0.0729489	-0.067268	-0.203263	-0.043755	-0.166056	2006-12-23
-0.157354	-0.146259	-0.287446	-0.0159301	-0.271775	2006-12-24
0.000459108	-0.0060657	0.15114	-0.00328053	0.0756363	2006-12-25
0.0856455	0.103894	0.215342	0.0037027	0.177031	2006-12-26
0.0460655	0.0183895	0.0260867	0.00642972	0.00750371	2006-12-27
0.0378602	0.0323864	0.457845	-0.00667639	0.044551	2006-12-28
-0.000656828	0.00652289	0.948281	0.0004723	0.0203354	2006-12-29
-0.0405612	-0.0332405	-1.15253	-0.00247825	-0.00222264	2006-12-30
0.0142926	0.0021583	-0.00847823	-0.0171689	0.069599	2006-12-31
0.283956	0.206736	0.427649	0.473923	0.580406	2007-01-01
-0.000327443	0.00153156	0.13683	0.22177	0.158	2007-01-02
0.177927	0.16918	0.180117	0.0703845	0.172002	2007-01-03
0.251123	0.204702	0.0938412	0.0241808	0.115624	2007-01-04
-0.0128408	-0.0724771	-0.33668	-0.0174826	-0.24569	2007-01-05
-0.506292	-0.280037	-0.562156	-0.394311	-0.622741	2007-01-06
0.342282	0.409298	0.432548	0.138412	0.409807	2007-01-07
-0.0813054	-0.211128	-0.0079147	0.0803004	-0.0519483	2007-01-08
0.209424	0.252243	0.586881	0.0727218	0.659458	2007-01-09
2.14281	2.04791	0.0286236	0.363355	0.939788	2007-01-10
0.0440546	0.217987	-0.401852	-0.550316	-0.638734	2007-01-11
-2.25579	-2.27357	-0.213802	0.164457	-0.824504	2007-01-12
0.111326	0.171262	0.100504	-0.00293628	0.107303	2007-01-13
0.0875411	0.0548691	0.436982	0.687203	0.399689	2007-01-14
0.642807	0.61412	2.72419	-0.386666	3.37647	2007-01-15
-0.0484634	-0.0942126	-2.50093	0.00245028	-3.09179	2007-01-16
0.0309872	0.0393729	-0.00611816	-0.0346528	-0.0243203	2007-01-17
-0.205122	-0.227318	-0.173867	-0.115046	-0.178522	2007-01-18
-0.250409	-0.349335	-0.422787	-0.0150068	-0.294834	2007-01-19
0.09883	0.198167	-0.130813	0.049514	0.0256402	2007-01-20
0.273107	0.353914	0.596916	0.129972	0.37614	2007-01-21
0.927438	1.72096	-0.246003	-0.169763	0.401721	2007-01-22
-1.23754	0.0582724	-0.0845499	-0.094072	-0.78001	2007-01-23
-0.233837	-2.3042	-0.0129455	-0.0282384	-0.134575	2007-01-24
-0.369789	-0.453764	-0.552411	-0.021285	-0.464263	2007-01-25
-0.197607	-0.0808879	-0.241593	-0.156801	-0.241594	2007-01-26
0.0243926	0.00540678	0.0865503	-0.23698	0.056692	2007-01-27
0.537001	1.40616	0.645521	0.419165	0.592501	2007-01-28
0.624916	-0.205264	-0.0260569	-0.165199	0.25803	2007-01-29
-0.554411	0.413206	-0.0439618	0.00219224	-0.24987	2007-01-30
-0.287854	-1.34025	-0.0896109	0.172792	-0.172147	2007-01-31
0.318584	0.243154	0.411387	0.0552182	0.424397	2007-02-01
0.260024	0.313112	-0.00364751	-0.525038	-0.211966	2007-02-02
-0.353849	-0.395952	0.0941411	-0.520063	-0.25259	2007-02-03
0.861845	0.812243	0.434495	1.08659	1.12876	2007-02-04
-0.938214	-0.892064	-0.897678	-0.101503	-1.00028	2007-02-05
0.0670501	0.078921	0.0878321	0.0337587	0.0807003	2007-02-06
-0.0001455	-0.00012857	-0.0527982	-0.0271918	-0.018267	2007-02-07
0.062857	0.0502246	0.0808598	-0.00455112	0.089375	2007-02-08
-0.475375	-0.521189	-0.522914	0.480997	-0.498448	2007-02-09
0.050948	-0.0419835	0.0414885	-0.636986	0.0319464	2007-02-10
0.27086	0.387007	0.4654	0.029703	0.398074	2007-02-11
0.0552895	-0.128909	0.0736853	-0.00689132	0.0320329	2007-02-12
0.307271	0.329837	0.204226	0.175496	0.264377	2007-02-13
0.2917	0.202518	0.30011	0.040161	0.269412	2007-02-14
0.343587	0.272051	0.304411	0.0668674	0.35827	2007-02-15
-0.466252	-0.834612	-0.211969	0.33346	-0.305574	2007-02-16
-0.520346	-0.218486	-0.579901	-0.714915	-0.459967	2007-02-17
0.754219	1.05135	0.816841	0.266527	0.626624	2007-02-18
0.188865	0.0885721	0.107089	-0.0172947	0.154287	2007-02-19
-0.376989	-0.262746	-0.528065	-0.03441	-0.382649	2007-02-20
-0.0153226	0.0848132	0.0875528	1.41505	0.0282638	2007-02-21
-0.113685	-0.104894	-0.1859	-1.4502	-0.147329	2007-02-22
-0.322199	-0.304336	-0.500517	-0.0757278	-0.455464	2007-02-23
-0.445942	-0.378278	-0.319099	-0.116357	-0.392153	2007-02-24
0.283735	0.239505	0.408628	0.146837	0.452718	2007-02-25
0.0975161	0.0988325	0.10528	0.019371	0.0958374	2007-02-26
0.133268	0.0970821	0.161941	0.0827493	0.154627	2007-02-27
0.108881	0.138094	0.0447428	0.0419557	0.0652078	2007-02-28
0.515834	0.529076	0.436064	0.164361	0.412614	2007-03-01
0.61295	-0.126749	-0.785674	-0.246912	0.0923636	2007-03-02
-0.906962	-0.376246	-0.107476	0.00215145	-0.742265	2007-03-03
-0.2514	-0.0834519	0.232558	0.0928704	0.042839	2007-03-04
-0.171989	-0.172465	-0.143644	0.00846023	-0.121068	2007-03-05
-0.0992296	-0.0937592	0.013088	-0.0885457	-0.0546075	2007-03-06
0.1084	0.119698	0.0136682	0.0160884	0.0275848	2007-03-07
-0.158878	-0.116362	-0.110483	0.0619444	-0.14432	2007-03-08
-0.120002	-0.138772	-0.158674	-0.0957293	-0.163264	2007-03-09
0.191893	0.226812	-0.00278582	-0.0844244	0.10089	2007-03-10
0.011704	1.61618	-0.00871964	0.0975433	0.00681268	2007-03-11
0.00401343	-1.63479	0.195334	0.0804336	0.143588	2007-03-12
0.126756	0.0653109	0.260533	0.0149628	0.200352	2007-03-13
0.18321	0.179188	1.61334	-0.00839434	1.71964	2007-03-14
0.0420385	0.0366743	-1.46834	0.0285124	-1.53651	2007-03-15
0.0525234	0.108667	-0.328266	-0.000266917	-0.179113	2007-03-16
-0.401796	-0.405343	-0.173269	0.0925287	-0.305254	2007-03-17
0.318954	0.317549	0.429726	-0.097573	0.39953	2007-03-18
0.26283	0.178215	0.0883147	0.0547696	0.147366	2007-03-19
0.29205	0.137602	0.135704	0.019919	0.200659	2007-03-20
0.434993	-0.204267	0.403806	0.131807	0.496708	2007-03-21
0.0345789	0.761338	-0.19269	-0.101625	0.192113	2007-03-22
-0.898205	-0.786879	-0.810504	0.0106908	-1.25706	2007-03-23
-0.591235	-0.560518	-0.16797	-0.29979	-0.323873	2007-03-24
0.287851	0.233417	0.445499	0.163206	0.453106	2007-03-25
0.0639576	0.0711162	-0.000428622	-0.0268462	0.0152666	2007-03-26
0.0228862	0.00370308	0.0183387	-0.0109674	0.0389752	2007-03-27
-0.000170009	0.0363472	-0.0780936	0.00617879	-0.0466127	2007-03-28
-0.00382879	0.039613	0.00528144	0.0162434	-0.00400722	2007-03-29
-0.0115552	-0.0072099	0.0412912	0.0867418	-0.0505697	2007-03-30
0.260647	0.215419	0.326991	0.021411	0.258221	2007-03-31
0.37894	0.415242	0.246188	0.170576	0.309056	2007-04-01
0.0863652	0.0732521	0.0128301	0.138458	0.08083	2007-04-02
0.114019	0.1241	0.0208315	-0.0124892	0.0500509	2007-04-03
-0.113273	-0.125912	-0.097957	-0.120584	-0.0751534	2007-04-04
-0.435893	-0.460277	-0.314824	-0.0513159	-0.361	2007-04-05
-0.088135	-0.0821126	-0.0652157	-0.0285559	-0.074067	2007-04-06
-0.275981	-0.278547	-0.254746	-0.241005	-0.281899	2007-04-07
0.346317	0.325201	0.313859	0.187524	0.314127	2007-04-08
0.163634	0.17415	0.27924	0.167505	0.218786	2007-04-09
-0.0765996	-0.0370762	-0.11614	-0.0983013	-0.143328	2007-04-10
0.07156	0.0799803	0.000426927	0.0420187	0.00472036	2007-04-11
0.202699	0.233553	0.170134	0.069689	0.215375	2007-04-12
-0.146406	-0.178546	-0.118836	-0.0569828	-0.0848057	2007-04-13
-0.149037	-0.138784	-0.0942296	-0.0296256	-0.110508	2007-04-14
0.516748	0.505511	0.23584	0.134038	0.269814	2007-04-15
-0.0844015	-0.0603183	0.0697599	0.0602484	0.0772512	2007-04-16
-0.0585929	-0.0744594	-0.0386829	-0.0623842	-0.0726386	2007-04-17
0.754705	0.739817	0.190356	0.137652	0.186654	2007-04-18
-0.171036	-0.184967	0.0836118	0.032461	0.0505319	2007-04-19
-0.89374	-0.861536	-0.421087	-0.309658	-0.409461	2007-04-20
-0.0554259	-0.0675181	-0.172949	-0.0877306	-0.0755177	2007-04-21
0.322102	0.382632	0.319081	0.232748	0.248683	2007-04-22
0.198135	0.18335	0.188658	0.185546	0.256366	2007-04-23
-0.441668	-0.485073	-0.331761	-0.299103	-0.404569	2007-04-24
0.385258	0.415127	0.313223	0.513751	0.362681	2007-04-25
0.00769363	-0.0425986	0.0303467	0.0286269	0.0243346	2007-04-26
-0.207224	-0.239308	-0.140481	-0.372412	-0.184807	2007-04-27
-0.41619	-0.399301	-0.426985	-0.275936	-0.443418	2007-04-28
0.407286	0.43197	0.376038	0.231028	0.406913	2007-04-29
-0.167926	-0.16993	-0.163544	-0.0638621	-0.155742	2007-04-30
0.0658576	0.0587935	0.0659658	0.0161361	0.0651589	2007-05-01
0.0943726	0.100665	0.050166	0.058185	0.0774253	2007-05-02
-0.074487	-0.0595424	-0.131676	-0.107178	-0.090614	2007-05-03
-0.414963	-0.391739	-0.320892	-0.116749	-0.393193	2007-05-04
-0.200188	-0.225232	-0.225874	-0.144836	-0.220544	2007-05-05
0.353566	0.308065	0.370684	0.242412	0.402543	2007-05-06
0.191168	0.236379	-0.0609245	0.0513106	0.159331	2007-05-07
0.0075701	0.00533181	0.257208	-0.023881	0.0118235	2007-05-08
0.14248	0.129191	0.127171	0.117811	0.183525	2007-05-09
0.147434	0.171464	-0.0164043	0.0787119	0.113259	2007-05-10
0.0862385	0.0716247	-0.380525	0.193329	0.0925417	2007-05-11
-0.473943	-0.451509	-0.443545	-0.396959	-0.459166	2007-05-12
-0.0459899	-0.0236548	0.516217	-0.00642211	-0.00861056	2007-05-13
-0.0582511	-0.069376	-0.0402514	-0.0563625	-0.0636358	2007-05-14
-0.0102355	-0.0181939	0.00525137	-0.0319417	-0.0591334	2007-05-15
0.102386	0.0905539	0.0903242	0.00569877	0.144924	2007-05-16
-0.0423358	-0.0562479	0.0520519	-0.00911091	-0.0489064	2007-05-17
-0.286298	-0.327195	-0.347812	-0.125187	-0.278013	2007-05-18
-0.0483027	-0.0472423	-0.0455024	-0.0636864	-0.0420901	2007-05-19
0.366542	0.38731	0.424724	0.223283	0.386873	2007-05-20
0.0308919	-0.0475271	-0.0431419	0.00784846	0.034757	2007-05-21
0.020763	0.0672261	-0.112581	-0.0408993	-0.0124335	2007-05-22
0.0503314	0.0676824	-0.106741	-0.0359589	-0.00161577	2007-05-23
-0.0956971	-0.0681733	0.145966	-0.0913646	-0.115989	2007-05-24
0.0109055	0.0369207	-0.0469031	-0.0444942	-0.00862044	2007-05-25
-0.118503	-0.0610167	-0.0433436	0.035162	-0.10351	2007-05-26
0.266354	0.281207	0.331033	0.279759	0.280435	2007-05-27
0.00925442	0.025754	-0.00437699	-0.129137	0.00107998	2007-05-28
0.268368	0.237512	0.172399	0.054762	0.21961	2007-05-29
0.0684858	0.0113734	-0.184539	-0.137121	0.0488385	2007-05-30
-0.342501	-0.312024	-0.288372	-0.113132	-0.2367	2007-05-31
-0.162942	-0.1336	-0.171369	-0.121248	-0.2196	2007-06-01
-0.0796768	-0.113931	0.165007	-0.0188276	-0.0612774	2007-06-02
0.179196	0.196766	0.181868	0.100088	0.171815	2007-06-03
-0.00806814	-0.0404071	0.0265807	0.00342804	0.00420582	2007-06-04
-0.04903	-0.0267997	-0.0896392	-0.110458	-0.0732118	2007-06-05
0.255884	0.231424	-0.0604131	-0.0892045	0.0372381	2007-06-06
0.230086	0.193653	0.147974	0.333888	0.220326	2007-06-07
-0.119983	-0.105587	-0.264583	-0.127241	-0.137883	2007-06-08
-0.367517	-0.357816	0.0535917	0.0223562	-0.174963	2007-06-09
0.282168	0.206911	-0.0137308	-0.04523	0.156552	2007-06-10
1.12609	1.13077	0.495154	0.164065	0.869116	2007-06-11
1.2443	0.349714	-0.0696197	-0.6392	0.809981	2007-06-12
-0.504471	0.378964	0.206782	0.5294	-0.469946	2007-06-13
-0.459003	-1.01306	0.195104	0.125458	-0.427661	2007-06-14
-0.086376	0.443696	-0.0175511	0.190296	0.169656	2007-06-15
-1.23302	-1.11681	-0.411179	-0.0437836	-0.827434	2007-06-16
0.881376	0.86206	0.905821	1.07224	1.01171	2007-06-17
0.769147	0.81438	-0.0804541	-0.368469	0.291414	2007-06-18
-0.200501	-0.213169	-0.00224974	-0.0706504	-0.21343	2007-06-19
-0.962862	-1.02745	-0.332868	-0.133625	-0.528151	2007-06-20
0.162267	0.182215	0.284254	0.14003	0.225986	2007-06-21
-0.0959146	-0.285858	-0.105859	0.0409787	-0.100049	2007-06-22
-0.175949	-0.456231	-0.172322	-0.110036	-0.176757	2007-06-23
0.0594185	0.23893	0.164697	0.150574	0.168493	2007-06-24
0.972227	1.21215	0.267424	0.23186	0.5679	2007-06-25
0.763383	0.716464	-0.0724214	0.147315	0.46064	2007-06-26
-0.142053	-0.0294369	0.0449656	-0.12392	-0.122556	2007-06-27
-1.55642	-1.54403	-0.37962	-0.173273	-0.943078	2007-06-28
-0.738202	-0.952015	-0.668585	-0.368652	-0.69819	2007-06-29
0.0198046	0.131146	0.201124	-0.036094	0.0944467	2007-06-30
0.0349205	0.0905406	0.304424	0.0621287	0.214604	2007-07-01
-0.0688397	-0.171273	-0.151079	-0.0974454	-0.157361	2007-07-02
-0.00365154	-0.0392139	0.103044	-0.0433204	0.0674121	2007-07-03
0.0306315	0.0722959	-0.138278	0.00279335	-0.00929617	2007-07-04
-0.151147	-0.138158	-0.0950657	-0.0391974	-0.0859606	2007-07-05
0.0221409	0.0351026	-0.118253	-0.0180227	-0.11791	2007-07-06
0.412107	0.425123	0.263894	0.136312	0.266637	2007-07-07
0.794184	0.806611	0.49264	0.363146	0.546655	2007-07-08
-0.700724	-0.717099	-0.411846	-0.304305	-0.400739	2007-07-09
-0.436997	-0.412317	-0.242934	-0.158037	-0.250973	2007-07-10
0.0215606	0.0080084	0.0670475	0.0394746	0.0853642	2007-07-11
0.381086	0.424465	0.232355	0.166808	0.245572	2007-07-12
-0.423437	-0.426203	-0.469831	-0.250383	-0.485885	2007-07-13
0.173731	0.174889	0.0859351	0.103517	0.0968463	2007-07-14
0.309804	0.311615	0.2504	0.107202	0.305885	2007-07-15
0.391728	0.253944	0.312194	0.271189	0.36205	2007-07-16
-0.159541	-0.119282	0.145461	-0.0328447	0.00578698	2007-07-17
-0.217907	-0.0313609	-0.180448	-0.120804	-0.209885	2007-07-18
-0.30894	-0.317528	-0.40144	-0.276596	-0.389783	2007-07-19
-0.395329	-0.425016	-0.355564	-0.0379127	-0.370577	2007-07-20
0.0903655	0.105583	0.118765	-0.0801066	0.0919455	2007-07-21
0.336022	0.3451	0.351664	0.271845	0.399838	2007-07-22
-0.0703855	-0.101285	-0.19848	-0.106931	-0.139537	2007-07-23
-0.297326	-0.308293	-0.360333	-0.255212	-0.31043	2007-07-24
-0.0381171	-0.0442645	0.0229643	0.00601282	-0.00240639	2007-07-25
-0.0872861	-0.0824541	-0.0230912	0.0379422	-0.0688674	2007-07-26
-0.216112	-0.248827	-0.142227	-0.198198	-0.219421	2007-07-27
0.0888907	0.0749274	-0.0158134	0.069818	0.03959	2007-07-28
0.539802	0.522957	0.661123	0.332971	0.628826	2007-07-29
-0.111585	-0.0991938	-0.173437	-0.0800534	-0.119055	2007-07-30
-0.320125	-0.283729	-0.379653	-0.277407	-0.397799	2007-07-31
-0.0306636	0.0123324	0.00172682	0.0692664	-0.0214093	2007-08-01
0.0407222	0.0223418	-0.0297398	-0.267639	0.0213713	2007-08-02
0.0756016	0.0828481	-0.0173238	-0.0161751	0.0328222	2007-08-03
-0.183314	-0.142879	-0.147178	-0.300752	-0.226659	2007-08-04
0.269543	0.255452	0.326522	0.36189	0.343779	2007-08-05
-0.181459	-0.234232	-0.26787	-0.458217	-0.213042	2007-08-06
-0.122548	-0.15404	0.0122943	0.144046	-0.0522943	2007-08-07
-0.0465429	-0.0560117	-0.1874	-0.252108	-0.131576	2007-08-08
-0.18562	-0.165211	-0.140604	0.0728443	-0.188612	2007-08-09
-0.181633	-0.148375	-0.179159	-0.534787	-0.238996	2007-08-10
-0.0630354	-0.0614223	0.0319259	0.122093	-0.0372209	2007-08-11
0.357186	0.323425	0.462183	0.155337	0.484866	2007-08-12
0.129057	0.0702268	0.0335529	0.308221	0.0756459	2007-08-13
-0.0361746	-0.055071	-0.0395426	0.137985	-0.0304992	2007-08-14
0.0918611	0.14713	0.0936882	0.0558568	0.117638	2007-08-15
-0.0766562	-0.0469859	-0.0587113	-0.15143	-0.0805565	2007-08-16
-0.173557	-0.192223	-0.0543353	-0.406601	-0.203244	2007-08-17
0.103673	0.0975724	0.0121243	0.267753	0.00670072	2007-08-18
0.3191	0.402135	0.200316	0.361168	0.369944	2007-08-19
-0.11349	-0.0954535	-0.0933405	0.025578	-0.100013	2007-08-20
-0.120914	-0.182513	-0.0771369	0.00502884	-0.088587	2007-08-21
-0.0105185	-0.0258239	-0.0153766	-0.0219575	-0.01682	2007-08-22
-0.0494209	-0.0045941	-0.0869809	-0.380473	-0.0745207	2007-08-23
-0.273521	-0.313206	-0.244254	-0.0231807	-0.271674	2007-08-24
-0.00554143	-0.0176503	0.0206226	-0.0462877	0.0162517	2007-08-25
0.142339	0.0911385	0.174402	0.211564	0.199407	2007-08-26
0.0413928	0.0230631	0.0522311	-0.034061	0.0148519	2007-08-27
0.00200763	0.150351	-0.00862226	-0.0385942	-0.00168972	2007-08-28
-0.013891	-0.0370923	-0.121305	-0.173689	-0.0746555	2007-08-29
0.0953271	0.0961179	0.0737521	0.208497	0.0714274	2007-08-30
-0.133119	-0.095379	-0.114549	0.0214315	-0.123527	2007-08-31
-0.054501	-0.0893245	-0.0435262	-0.00175396	-0.0684723	2007-09-01
0.406257	0.410938	0.518506	0.341552	0.47506	2007-09-02
0.229578	0.233251	-0.0225539	-0.224896	-0.154458	2007-09-03
0.264843	0.229981	0.0256029	0.249041	0.228081	2007-09-04
-0.412952	-0.370417	-0.133807	-0.0208085	-0.0518566	2007-09-05
0.139921	0.61468	0.16574	0.0744289	0.156071	2007-09-06
-0.342809	-0.857869	-0.282291	-0.249228	-0.324031	2007-09-07
-0.0121346	-0.0185531	-0.190637	-0.0538852	-0.114238	2007-09-08
0.0611586	0.0737972	0.118113	0.0513079	0.0824472	2007-09-09
0.0525695	0.0175637	0.0821999	0.017786	0.0721387	2007-09-10
-0.0548064	-0.00340364	-0.00602864	0.0476851	-0.0373668	2007-09-11
0.14344	0.227401	-0.0109271	0.00569784	0.063917	2007-09-12
-0.0114656	-0.0113979	0.0865605	0.0741681	0.0352749	2007-09-13
-0.221072	-0.272958	-0.191149	-0.0601783	-0.219924	2007-09-14
-0.067051	0.010399	-0.0423683	-0.075893	-0.0446249	2007-09-15
0.304536	0.374065	0.336873	0.149095	0.30916	2007-09-16
-0.145416	-0.300556	-0.262732	-0.00872737	-0.140107	2007-09-17
-0.0205821	-0.0730815	0.00429162	0.00748338	-0.0487599	2007-09-18
0.266768	0.270377	0.31261	0.0412841	0.275718	2007-09-19
-0.101391	-0.133513	-0.150261	0.0725575	-0.0891584	2007-09-20
0.141053	0.160181	-0.0855604	-0.0101832	-0.0103709	2007-09-21
-0.401648	-0.381704	-0.216921	-0.178032	-0.304905	2007-09-22
0.371769	0.87206	0.322298	0.117638	0.302162	2007-09-23
-0.0603565	-0.506615	-0.0522723	-0.0278257	-0.0305094	2007-09-24
-0.247275	-0.195855	-0.182703	0.0698992	-0.206453	2007-09-25
0.136358	0.174221	0.0872846	0.0370074	0.161916	2007-09-26
-0.0105476	0.0458842	0.0460661	-0.00436691	0.0257295	2007-09-27
-0.191116	-0.330061	-0.2037	-0.150591	-0.216471	2007-09-28
-0.187604	-0.143269	-0.131894	-0.918866	-0.183924	2007-09-29
0.0522666	0.0199846	0.0114955	0.524662	0.0778067	2007-09-30
0.149727	0.126536	0.222103	0.0778243	0.138755	2007-10-01
0.0831219	0.112563	-0.104719	-0.168029	0.00848204	2007-10-02
-0.116418	0.00671749	0.0406074	0.0672956	-0.0731036	2007-10-03
-0.0307941	0.425959	-0.0524186	-0.0256296	-0.0460675	2007-10-04
-0.284859	-0.215571	-0.310054	-0.344028	-0.348748	2007-10-05
-0.0324316	-0.0906663	0.075252	-0.00177523	0.0291739	2007-10-06
0.292731	1.84533	0.203911	0.468423	0.338629	2007-10-07
0.092761	-1.35399	-0.03282	0.0654047	0.09085	2007-10-08
-0.174626	0.280532	-0.0510428	-0.190569	-0.148827	2007-10-09
0.122603	0.14379	0.185497	0.160123	0.122401	2007-10-10
-0.0236448	-1.10315	0.0420458	-0.0196443	0.0356961	2007-10-11
-0.243814	-0.440621	-0.210401	-0.271072	-0.236804	2007-10-12
-0.226434	-0.278083	-0.283814	-0.284672	-0.341071	2007-10-13
0.264108	0.305968	0.176377	0.370688	0.248197	2007-10-14
0.129907	0.143341	0.0524735	0.0766765	0.0833728	2007-10-15
-0.0985745	-0.151043	0.0645581	1.82844	0.0265593	2007-10-16
-0.218215	-0.2124	-0.233399	-2.24895	-0.274438	2007-10-17
-0.0337064	-0.0401162	0.0370351	-0.0582527	-0.0671435	2007-10-18
-0.0464193	-0.0524444	0.0836669	0.0598586	0.0430477	2007-10-19
0.270048	0.294744	0.274259	0.293088	0.294533	2007-10-20
1.97455	0.501742	0.78472	0.906691	0.952235	2007-10-21
-1.56585	0.1171	-0.635058	-0.590665	-0.612094	2007-10-22
-0.140181	0.830522	-0.0833246	-0.128134	-0.102986	2007-10-23
0.187511	-0.82432	0.208736	0.303896	0.209209	2007-10-24
-0.106019	0.378717	-0.0229316	-0.14562	-0.0358248	2007-10-25
-0.193414	-0.649225	-0.285967	-0.229874	-0.269708	2007-10-26
-0.298771	-0.221781	-0.261684	-0.418146	-0.311069	2007-10-27
0.241579	1.18916	0.0617396	0.263068	0.150127	2007-10-28
0.0868908	-0.463039	0.175366	0.25835	0.0976004	2007-10-29
0.0271315	0.0143139	0.0240701	-0.0994184	0.0443202	2007-10-30
-0.0322755	-0.367643	-0.0170624	0.132305	0.00259264	2007-10-31
-0.0388723	0.0208354	0.0866669	0.0247388	0.0312197	2007-11-01
-0.374323	-0.518783	-0.333526	-0.245578	-0.414388	2007-11-02
-0.0162838	3.07527	0.0638338	0.111981	0.0711647	2007-11-03
0.180937	-2.94816	0.0503362	-0.0209552	0.0644109	2007-11-04
-0.0247378	-0.141187	-0.0461763	0.0726071	-0.0202227	2007-11-05
0.119323	0.0085403	0.19838	0.100271	0.251297	2007-11-06
-0.0189968	0.0295703	-0.147827	-0.0356962	-0.119485	2007-11-07
-0.0181147	-0.0698633	0.0604093	0.0281662	0.0260498	2007-11-08
-0.189389	-0.158239	-0.186679	-0.122385	-0.210533	2007-11-09
-0.132268	-0.108219	-0.1434	-0.00123325	-0.16499	2007-11-10
0.445315	0.444434	0.438475	0.0392489	0.459097	2007-11-11
0.0168235	-0.0338025	0.0650131	0.116369	0.0190201	2007-11-12
0.105225	0.112058	0.0877523	0.102881	0.130108	2007-11-13
0.184653	0.221733	0.132371	0.129602	0.201648	2007-11-14
0.0853416	0.0341144	0.928103	0.259251	0.875119	2007-11-15
-0.696171	-0.668218	-0.504812	-0.293634	-0.0987657	2007-11-16
0.109773	0.120958	-0.710985	-0.0949169	-1.07987	2007-11-17
0.975588	0.848741	0.797681	0.427336	0.804501	2007-11-18
-0.477875	-0.356958	-0.58789	-0.290905	-0.482957	2007-11-19
-0.175889	-0.257722	-0.20557	-0.138182	-0.240259	2007-11-20
0.0981291	1.19103	0.0358428	0.0409547	0.058634	2007-11-21
0.0328504	-0.90101	0.0642769	0.0469788	0.0273711	2007-11-22
-0.386793	-0.501518	-0.225743	-0.0966493	-0.275352	2007-11-23
-0.101495	-0.0885439	-0.119913	0.00318127	-0.145167	2007-11-24
0.271072	0.284475	0.20205	0.0545185	0.266044	2007-11-25
0.0883578	0.0940215	0.182217	0.0224535	0.128238	2007-11-26
0.118595	0.120303	0.0734664	0.0447965	0.0778143	2007-11-27
-0.0435455	-0.109588	-0.0320753	-0.0186553	-0.0642601	2007-11-28
-0.0943878	-0.0689832	-0.0546423	0.0243124	-0.0384179	2007-11-29
-0.338557	-0.354142	-0.21281	-0.0894338	-0.249025	2007-11-30
0.172457	0.11134	0.0233642	0.125116	0.13157	2007-12-01
0.253586	0.429792	0.097869	-0.0175741	0.230456	2007-12-02
0.116491	0.0737085	0.124889	0.0221026	0.0458376	2007-12-03
0.0890922	0.0523393	0.0899023	0.0265387	0.0614504	2007-12-04
1.31899	0.968887	0.893516	1.23297	1.43742	2007-12-05
-1.24203	-0.210686	-0.946475	-1.14231	-1.23627	2007-12-06
-0.344081	-1.05381	-0.157663	-0.159071	-0.446333	2007-12-07
0.00115824	-0.0242292	-0.199788	0.00704133	-0.0811879	2007-12-08
0.295458	1.09167	0.452872	0.0728418	0.324723	2007-12-09
-0.222763	-0.293997	-0.145418	-0.0808719	-0.187639	2007-12-10
-0.230535	-0.714674	-0.232857	-0.110696	-0.200636	2007-12-11
0.0320829	-0.0735753	0.143534	0.0877778	0.110555	2007-12-12
0.0531829	0.0352762	0.0952195	-0.104357	0.102117	2007-12-13
-0.184727	-0.241088	-0.309882	-0.0446605	-0.255561	2007-12-14
-0.273944	-0.220211	-0.21474	-0.159623	-0.314815	2007-12-15
0.523671	0.532133	0.372687	0.267866	0.569449	2007-12-16
-0.118639	-0.194752	0.0731347	-7.85748e-05	-0.0326419	2007-12-17
0.0504269	0.0364166	0.181608	0.0577909	0.103209	2007-12-18
-0.0767923	-0.0466192	-0.105008	0.136145	-0.0898555	2007-12-19
0.109005	0.0998639	-0.18484	-0.00926268	-0.0325865	2007-12-20
-0.377731	-0.36464	-0.345127	-0.463444	-0.443197	2007-12-21
-0.193657	-0.167256	-0.227012	-0.405025	-0.287793	2007-12-22
0.00846631	0.0329553	0.00874378	0.000570579	0.00457593	2007-12-23
-0.153452	-0.167498	-0.119354	0.00436105	-0.169728	2007-12-24
0.159926	0.137051	0.278715	0.0590386	0.206074	2007-12-25
0.182514	0.146606	0.227218	0.305892	0.248173	2007-12-26
0.428996	0.0697849	0.413627	0.522288	0.483423	2007-12-27
0.28481	0.482582	0.333954	0.0864261	0.319693	2007-12-28
-0.747882	-0.583205	-0.29354	-0.408711	-0.730971	2007-12-29
0.198881	0.139763	1.58691	-0.08066	1.07752	2007-12-30
-0.169334	-0.155616	-1.07534	-0.241768	-0.787181	2007-12-31
0.133964	0.153604	-0.969608	0.248011	-0.262356	2008-01-01
0.146072	0.159938	0.204862	0.00388706	0.235464	2008-01-02
0.333662	0.391055	3.44016	-0.212903	1.08462	2008-01-03
-0.015023	0.00998329	-2.96581	-0.37367	-0.659034	2008-01-04
-0.233204	-0.210008	-0.463665	-0.0201609	-0.413061	2008-01-05
0.0813295	1.14482	0.10926	0.346087	0.0776862	2008-01-06
-0.225617	-1.1815	-0.184237	0.163179	-0.19685	2008-01-07
0.142419	0.00269958	0.195567	0.378442	0.181775	2008-01-08
0.347487	0.232109	3.59523	0.301299	1.06267	2008-01-09
-0.224007	-0.253399	-3.53316	-0.16636	-0.758779	2008-01-10
-0.459851	-0.368836	-0.450945	-0.451567	-0.674875	2008-01-11
0.227783	0.233084	0.10997	0.210136	0.182475	2008-01-12
-0.0466163	0.0035513	0.125055	0.225612	0.0963997	2008-01-13
0.184498	0.129895	0.118418	-0.0648913	0.114686	2008-01-14
0.000127962	0.0211781	-0.0431276	0.0388166	-0.00217846	2008-01-15
-0.215297	-0.229703	-0.148574	-0.133773	-0.184459	2008-01-16
-0.0515432	-0.0388592	0.0806693	-0.0485751	-0.01652	2008-01-17
-0.330078	-0.331544	-0.42589	-0.413781	-0.415654	2008-01-18
-0.0320358	-0.0247829	-0.175283	-0.141948	-0.111326	2008-01-19
0.332049	0.655999	0.408129	0.708505	0.434311	2008-01-20
-0.0414121	-0.391409	0.00432698	0.0218606	-0.0138177	2008-01-21
0.00999189	-0.0106191	0.0622109	0.0533095	0.0251331	2008-01-22
0.0164347	0.0478476	0.0176756	-0.0861213	0.0194888	2008-01-23
0.0759118	0.0791333	0.169338	0.0797157	0.163076	2008-01-24
-0.11544	-0.141589	-0.055821	-0.176279	-0.0873185	2008-01-25
-0.110569	-0.0718657	-0.307502	-0.309511	-0.296797	2008-01-26
0.165289	0.182104	0.151364	0.10242	0.145723	2008-01-27
0.469494	0.472644	0.388473	0.393249	0.467736	2008-01-28
0.135749	2.36082	0.0748614	0.0604675	0.0722246	2008-01-29
-0.199207	-2.04436	-0.183436	-0.0891679	-0.168409	2008-01-30
-0.310374	-0.686439	-0.147856	-0.0463208	-0.213112	2008-01-31
-0.0930728	-0.125279	-0.13197	0.0230117	-0.132258	2008-02-01
-0.131377	-0.131574	-0.184824	-0.184713	-0.169344	2008-02-02
0.216803	1.01092	1.00626	-0.106167	0.992205	2008-02-03
0.1083	-0.508554	-0.696776	0.240347	-0.600605	2008-02-04
-0.0714025	-0.229612	-0.0419116	0.0667231	-0.0625403	2008-02-05
-0.134676	1.97132	-0.132714	0.0545483	-0.170885	2008-02-06
0.0203516	-1.53219	0.0361394	-0.0594813	0.0259655	2008-02-07
-0.102268	-0.647544	-0.158199	-0.0528377	-0.149487	2008-02-08
-0.128174	-0.119983	-0.1207	-0.0107984	-0.148074	2008-02-09
0.170702	0.138646	0.340082	0.0845546	0.334623	2008-02-10
0.0161464	-0.00187903	-0.055315	-0.00988642	-0.0290999	2008-02-11
-0.0267527	0.0539192	-0.0756774	-0.229368	-0.0598881	2008-02-12
-0.000736318	-0.056141	0.0128611	-0.127098	0.0337963	2008-02-13
-0.00583017	-0.0341391	1.23109	0.821475	1.22714	2008-02-14
-0.154592	-0.175155	-0.785142	-0.385125	-0.908669	2008-02-15
-0.0147485	0.0252064	-0.365045	-0.152764	-0.4015	2008-02-16
0.187248	0.180731	4.3964	0.0308476	1.45943	2008-02-17
0.0365911	0.0256178	-2.46276	0.160454	-0.734073	2008-02-18
0.0525971	0.606977	-1.92974	-0.0778129	-0.594425	2008-02-19
0.00950456	0.137283	0.0450505	-0.0133811	0.0362181	2008-02-20
0.00475568	3.32823	-0.104394	-0.214263	-0.0784216	2008-02-21
-0.192385	-0.0947344	-0.263153	0.098633	-0.344754	2008-02-22
-0.130934	-4.14454	0.0293516	-0.0562093	0.00481419	2008-02-23
0.147366	0.110549	0.247572	-0.0483112	0.264401	2008-02-24
0.0375153	-0.00278611	-0.0106419	0.0622788	0.0224502	2008-02-25
-0.0478683	-0.0178081	-0.0550215	0.175877	-0.0488526	2008-02-26
0.0859257	-0.00911177	0.0870739	-0.0174095	0.0803549	2008-02-27
-0.0622434	0.0380678	-0.0570839	-0.0370523	-0.0618254	2008-02-28
-0.130197	-0.180483	-0.129944	-0.0729493	-0.165148	2008-02-29
-0.0592619	-0.0482079	-0.0321111	-0.0711582	-0.0589521	2008-03-01
0.103439	0.094705	0.415851	0.192722	0.503311	2008-03-02
-0.01114	-0.0380319	-0.11113	-0.0949102	-0.161513	2008-03-03
0.511012	0.219294	3.60792	0.0773625	0.279269	2008-03-04
0.184843	0.256169	-0.138974	0.074592	0.151923	2008-03-05
-0.137111	0.0622636	-1.15568	-0.0647064	-0.121601	2008-03-06
-0.517454	-0.540399	-2.38725	-0.258123	-0.508841	2008-03-07
-0.0281902	0.044363	0.058525	0.0328143	0.0164823	2008-03-08
0.190409	0.210917	0.381479	0.459962	0.517555	2008-03-09
0.398152	0.445244	0.46847	-0.172682	0.088916	2008-03-10
-0.0861108	-0.143673	2.47659	-0.0654372	-0.0678946	2008-03-11
0.442949	0.48552	0.475503	0.133626	0.438298	2008-03-12
-0.029372	-0.104688	-2.8818	0.0606893	0.184138	2008-03-13
-0.144815	-0.257375	-0.362909	0.044073	-0.405511	2008-03-14
-0.247808	-0.0647685	0.261242	0.0546954	0.252212	2008-03-15
1.0086	0.541893	1.83711	-0.135631	1.91603	2008-03-16
-0.754605	-0.343467	-2.23484	0.106705	-2.13753	2008-03-17
-0.312787	-0.26653	-0.167872	-0.259927	-0.327614	2008-03-18
-0.193828	-0.241634	-0.285235	-0.321181	-0.234396	2008-03-19
-0.332238	-0.36113	-0.401086	-0.333525	-0.389195	2008-03-20
0.00608242	0.00543017	0.104706	0.0830961	0.0314245	2008-03-21
-0.080621	-0.0472114	-0.0655161	-0.0881841	-0.0850134	2008-03-22
0.0819774	0.0377021	0.0891729	-0.306122	0.095984	2008-03-23
0.0986802	0.156305	0.124891	0.540286	0.17772	2008-03-24
0.118879	0.37254	0.145393	0.184944	0.160892	2008-03-25
-0.122421	-0.374942	0.0212759	-0.0374456	0.00168825	2008-03-26
0.0313796	0.00304266	-0.0140301	0.045815	-0.0376999	2008-03-27
-0.0222418	-0.0841294	-0.0499174	0.00467359	-0.0536338	2008-03-28
-0.0679079	-0.0707949	-0.155306	-0.152011	-0.121642	2008-03-29
0.0806958	0.0485492	0.60978	0.562694	0.63569	2008-03-30
0.171953	0.169031	-0.164365	-0.165225	-0.204098	2008-03-31
-0.03692	0.0303415	-0.214541	-0.0844067	-0.119861	2008-04-01
0.0679577	0.122541	0.14513	-0.227296	0.0592489	2008-04-02
-0.119772	-0.0865343	0.0113234	-0.208032	-0.0743424	2008-04-03
-0.0951363	-0.117116	-0.20613	-0.0700116	-0.291707	2008-04-04
-0.0396896	-0.104248	-0.024415	0.195087	0.0419411	2008-04-05
0.149794	0.130734	0.210868	0.383163	0.263736	2008-04-06
0.00815616	0.00891554	-0.0590249	-0.168328	-0.0641178	2008-04-07
-0.0629372	-0.00454686	0.235365	0.112465	0.251102	2008-04-08
0.179665	0.168907	0.125129	0.0901652	0.152046	2008-04-09
-0.0346797	-0.02282	-0.308817	-0.221367	-0.346824	2008-04-10
-0.129065	-0.121167	-0.186038	-0.200168	-0.207208	2008-04-11
0.0707598	0.102426	0.136041	0.0671477	0.142765	2008-04-12
0.269193	0.260588	0.243218	0.297884	0.260705	2008-04-13
-0.0296551	-0.0625194	-0.0158545	0.0636815	0.00985402	2008-04-14
0.0886865	0.10291	0.0908953	0.0171616	0.0989597	2008-04-15
0.0373066	-0.0221582	0.0707158	0.0168638	0.049005	2008-04-16
-0.143565	-0.132522	-0.0702833	-0.006025	-0.0957729	2008-04-17
-0.163417	-0.216132	-0.169649	-0.121533	-0.174849	2008-04-18
-0.0224666	0.0150786	-0.123291	-0.1321	-0.102237	2008-04-19
0.228804	0.16203	0.261394	0.150106	0.269239	2008-04-20
0.0791698	0.117278	-0.026969	0.000404125	-0.000319949	2008-04-21
-0.136835	-0.135731	-0.0503823	-0.210645	-0.113175	2008-04-22
-0.122308	-0.101369	-0.0988844	-0.256434	-0.109322	2008-04-23
-0.130969	-0.176261	-0.19872	0.250139	-0.164623	2008-04-24
-0.0395272	-0.0551597	-0.0194231	-0.110689	-0.0070557	2008-04-25
0.109947	0.172637	0.142208	0.13486	0.154233	2008-04-26
0.465258	0.46453	0.366697	0.174124	0.385951	2008-04-27
0.190527	0.185741	0.180454	0.198929	0.192915	2008-04-28
0.0176884	-0.0428737	-0.0677899	0.180516	0.0728969	2008-04-29
-0.222471	-0.265043	0.0686241	-0.0681568	0.0211187	2008-04-30
-0.136968	-0.0228698	-0.151572	-0.215956	-0.180332	2008-05-01
-0.0306118	0.0473392	-0.15652	0.112251	-0.194133	2008-05-02
-0.0814736	-0.0976232	-0.14976	-0.256962	-0.17751	2008-05-03
0.0661883	0.015535	0.46415	0.292903	0.502228	2008-05-04
0.0673948	0.142204	-0.22845	-0.202199	-0.214747	2008-05-05
-0.108991	-0.137578	0.100191	0.0696478	0.0877063	2008-05-06
0.341204	0.2345	0.0940435	0.00734347	0.0679236	2008-05-07
-0.150853	-0.192413	-0.143575	-0.0584911	-0.137052	2008-05-08
-0.00453684	0.079521	-0.0638594	0.068849	-0.0899419	2008-05-09
-0.116578	-0.0870279	-0.120929	-0.0536289	-0.130192	2008-05-10
0.276045	0.211785	0.236885	0.188879	0.261946	2008-05-11
0.27924	0.208285	0.215564	-0.0153333	0.224828	2008-05-12
-0.44839	-0.330297	-0.394417	-0.344431	-0.3715	2008-05-13
-0.100743	-0.0581865	-0.231996	-0.039414	-0.0671965	2008-05-14
0.0621713	-0.0350791	0.132014	0.131462	0.130986	2008-05-15
0.0710432	0.106324	0.206755	0.620636	0.326872	2008-05-16
-0.158158	-0.0611842	0.0246482	-0.371088	-0.178196	2008-05-17
0.0456819	0.00143344	0.0548847	0.0712746	0.0955413	2008-05-18
-0.0173239	-0.0329944	-0.236302	-0.295592	-0.38016	2008-05-19
0.0207013	0.0830396	-0.0178561	-0.0318651	-0.0202976	2008-05-20
0.202705	0.172751	0.0937951	0.0962226	0.158782	2008-05-21
-0.037256	-0.0400609	-0.0571952	-0.0338498	-0.0539489	2008-05-22
-0.0821443	-0.0181104	-0.114482	0.0238052	-0.0932561	2008-05-23
0.0714792	-0.000947671	0.133318	-0.0409185	0.0747706	2008-05-24
-0.000175381	0.0193662	0.0201216	0.187638	0.0659004	2008-05-25
0.0632394	0.0762806	0.0761459	-0.0252705	0.0338502	2008-05-26
0.291434	0.260651	0.265396	0.102905	0.234106	2008-05-27
-0.149548	-0.104496	-0.233094	-0.0727622	-0.146259	2008-05-28
-0.233387	-0.266823	-0.13883	-0.0948425	-0.165843	2008-05-29
-0.117994	-0.135312	-0.030685	-0.0694947	-0.0896916	2008-05-30
0.0275434	0.00474075	0.100951	0.0165457	0.0731221	2008-05-31
0.206764	0.2139	0.0312819	0.141106	0.154683	2008-06-01
0.0244856	-0.0903081	0.00316958	0.018278	0.0124161	2008-06-02
0.0834561	0.150684	-0.0340767	0.0015618	0.0134435	2008-06-03
0.0235281	0.0283029	-0.0172209	-0.0155385	-0.0336125	2008-06-04
0.0420323	0.0366646	0.0110481	0.0553997	0.0895272	2008-06-05
-0.204382	-0.207459	-0.0227718	-0.12953	-0.184609	2008-06-06
-0.432071	-0.357734	-0.429087	-0.114534	-0.595777	2008-06-07
0.00223159	-0.00253037	0.0159142	-0.268545	0.094276	2008-06-08
0.236466	0.2506	0.090722	0.285004	0.221433	2008-06-09
-0.11187	-0.106738	-0.0329081	-0.0903321	-0.0625205	2008-06-10
0.0613412	0.09498	0.0604999	-0.0258839	0.0604918	2008-06-11
0.163195	0.138154	0.232675	0.146664	0.205368	2008-06-12
-0.0496714	-0.0364384	-0.000130924	0.00942203	-0.0423507	2008-06-13
-0.136708	-0.151254	-0.151939	-0.128697	-0.159961	2008-06-14
0.0541163	0.0526433	0.0962474	0.0406733	0.106101	2008-06-15
-0.0119232	-0.0234325	-0.160078	-0.0660484	-0.072189	2008-06-16
-0.195736	-0.207147	-0.00212137	-0.0442806	-0.147981	2008-06-17
-0.036241	-0.020769	-0.00616494	0.0851984	0.0174828	2008-06-18
0.069025	0.16628	-0.00139983	-0.0468161	0.013031	2008-06-19
-0.00489941	-0.00162815	-0.158528	-0.0587546	-0.10885	2008-06-20
0.0869848	0.736741	0.110443	-0.022432	0.0397686	2008-06-21
0.369208	0.205746	0.350598	0.344497	0.410984	2008-06-22
-0.183093	-0.0773436	-0.135257	-0.25892	-0.14059	2008-06-23
-0.186636	-0.777835	-0.171762	-0.265378	-0.170445	2008-06-24
0.0834168	0.0534645	0.134094	-0.0234263	0.139793	2008-06-25
0.028756	0.0246473	0.0432392	0.00857446	0.0132799	2008-06-26
0.0388102	-0.0293011	-0.164743	-0.177111	-0.0816078	2008-06-27
-0.333134	-0.453348	-0.264684	-0.506453	-0.312348	2008-06-28
0.0697915	0.207559	0.134947	0.0680184	0.142241	2008-06-29
-0.204221	-0.207492	-0.0825451	-0.328863	-0.134525	2008-06-30
-0.0987827	-0.0924912	-0.0507767	-0.343668	-0.097056	2008-07-01
0.186248	0.145654	0.263253	0.843174	0.177724	2008-07-02
0.221572	0.222651	0.112281	0.321549	0.201011	2008-07-03
-0.218381	-0.185626	-0.229485	-0.269471	-0.219025	2008-07-04
-0.171237	-0.181698	-0.232046	-0.143432	-0.248533	2008-07-05
0.0995178	0.0827439	0.308616	0.0974206	0.219777	2008-07-06
0.136784	0.10899	0.113895	0.349647	0.203384	2008-07-07
0.173683	0.202438	-0.0539532	0.00498791	-0.00146731	2008-07-08
0.0492452	0.0881628	-0.00928268	-0.0634196	0.0725891	2008-07-09
-0.11989	-0.139732	0.0115342	-0.349608	-0.0903686	2008-07-10
-0.112952	-0.160272	-0.196678	0.000366555	-0.169186	2008-07-11
-0.273022	-0.244678	-0.236327	-0.678689	-0.268434	2008-07-12
0.0585636	0.0666096	0.114588	-0.220257	0.137208	2008-07-13
-0.00104821	-0.038811	0.188295	-0.000425028	0.124447	2008-07-14
0.185901	0.0272912	0.11049	0.792147	0.111977	2008-07-15
0.0365427	0.112332	-0.0319886	0.121842	0.0134868	2008-07-16
0.0553937	0.00700677	0.087763	-0.695299	0.100363	2008-07-17
-0.119462	-0.115489	-0.252562	0.11521	-0.210633	2008-07-18
-0.070036	0.0641358	0.0474026	1.03436	-0.0096954	2008-07-19
0.170166	0.222706	0.212322	-0.388073	0.240417	2008-07-20
0.127103	0.10855	0.127396	0.336767	0.107813	2008-07-21
2.03486	2.07374	1.84063	0.600049	1.9239	2008-07-22
-1.89977	-1.90383	-1.82608	-0.224237	-1.89669	2008-07-23
-0.163217	-0.23393	-0.07078	-0.159672	-0.0596771	2008-07-24
-0.0668637	-0.141402	-0.149129	-0.0398049	-0.144685	2008-07-25
0.101109	0.130249	0.0885014	0.101102	0.0414416	2008-07-26
0.330106	0.509135	0.295729	0.118856	0.295519	2008-07-27
-0.215194	-0.244262	-0.222315	-0.00401253	-0.176968	2008-07-28
-0.156697	-0.177139	-0.113242	-0.101195	-0.149181	2008-07-29
-0.107766	-0.0966357	-0.188764	-0.0930361	-0.154345	2008-07-30
0.00825508	-0.0434347	0.0213385	-0.0389237	0.0231366	2008-07-31
0.0243878	-0.15881	0.0782709	0.0745464	0.0791599	2008-08-01
-0.134693	0.0322117	-0.135412	-0.126724	-0.149862	2008-08-02
0.163351	0.198682	0.26179	0.107712	0.202149	2008-08-03
0.178986	0.163478	0.0974331	0.158539	0.1416	2008-08-04
0.0597751	0.0350422	0.000725053	-0.00779449	0.0802314	2008-08-05
-0.0129988	-0.0314104	0.0346178	0.0254677	0.0143	2008-08-06
0.0568473	0.0873863	0.063793	0.116811	0.0644254	2008-08-07
-0.12251	-0.126321	-0.103049	-0.0478286	-0.146264	2008-08-08
0.246648	0.228845	0.164896	0.0880177	0.201093	2008-08-09
0.240696	0.253793	0.37995	0.116838	0.307525	2008-08-10
-0.238	-0.201534	-0.325348	-0.125391	-0.236147	2008-08-11
0.0361256	0.0335835	0.0698384	0.0289021	0.00587425	2008-08-12
-0.0747854	-0.0617818	-0.182847	-0.288766	-0.123904	2008-08-13
-0.291207	-0.295906	-0.225026	0.117848	-0.26957	2008-08-14
-0.0651642	-0.00162835	-0.132843	-0.0755062	-0.141023	2008-08-15
-0.11629	-0.129114	-0.0994195	-0.121212	-0.109156	2008-08-16
0.32676	0.276769	0.368457	0.19819	0.343693	2008-08-17
-0.121373	-0.145814	-0.13302	-0.00487272	-0.108297	2008-08-18
-0.0946712	-0.0915112	-0.059243	-0.047175	-0.0342306	2008-08-19
0.0421349	0.0544184	0.0114325	-0.0195285	0.0361803	2008-08-20
0.299072	0.173248	0.236814	0.150572	0.178229	2008-08-21
-0.0195828	0.04643	0.0355356	0.0611889	0.0420929	2008-08-22
-0.127686	-0.0684661	-0.1119	-0.160599	-0.131646	2008-08-23
0.153098	0.117457	0.0784003	0.0569548	0.101083	2008-08-24
-0.294957	-0.227506	-0.207927	-0.182601	-0.205639	2008-08-25
0.115491	-0.132901	0.144934	0.065627	0.12718	2008-08-26
-0.124296	-0.0533406	-0.146442	-0.00720848	-0.177584	2008-08-27
-0.185555	-0.0506191	-0.194931	-0.108109	-0.173821	2008-08-28
-0.125835	-0.116114	-0.213941	-0.0695882	-0.161476	2008-08-29
0.0272273	0.0163128	0.0152515	-0.0551295	0.0156162	2008-08-30
0.32396	0.27028	0.349684	0.0975799	0.375618	2008-08-31
0.0791957	0.011635	0.10902	0.153251	0.127937	2008-09-01
0.198821	0.105769	-0.0275007	0.224875	0.144259	2008-09-02
-0.0932081	0.0764494	0.0695356	-0.117368	-0.0768878	2008-09-03
-0.100005	-0.209289	-0.0612469	-0.0648395	-0.0926819	2008-09-04
0.0054525	0.0100583	-0.0973238	-0.170268	-0.0802485	2008-09-05
-0.39065	-0.284667	-0.227964	-0.0702819	-0.334515	2008-09-06
0.403379	0.158531	0.340695	0.27977	0.415282	2008-09-07
0.144285	-0.00402855	0.104296	0.0770144	0.110307	2008-09-08
-0.0981687	-0.0987905	-0.115556	0.0162178	-0.0881064	2008-09-09
-0.0698728	0.175983	-0.230147	-0.133941	-0.0485562	2008-09-10
-0.331334	-0.145414	-0.294848	-0.409083	-0.370731	2008-09-11
-0.186601	-0.134501	-0.0588195	0.00804445	-0.152653	2008-09-12
-0.167082	-0.138776	-0.155402	-0.168369	-0.229706	2008-09-13
0.313254	0.23432	0.393191	0.278395	0.413101	2008-09-14
0.303989	0.300451	0.44603	0.322388	0.364609	2008-09-15
-0.0601064	-0.149555	-0.190986	-0.116377	-0.0395671	2008-09-16
-0.0863117	0.0237373	-0.126652	-0.324092	-0.129222	2008-09-17
-0.0847445	-0.0577787	-0.0761052	-0.305561	-0.0740398	2008-09-18
0.0829903	0.803361	-0.0488738	0.656675	0.0779599	2008-09-19
0.0971269	-0.645794	0.204905	-0.0488574	0.0964004	2008-09-20
0.627784	0.577432	0.169744	0.270417	0.591979	2008-09-21
-0.107322	-0.174393	0.109525	-0.0264335	-0.0325125	2008-09-22
-0.828273	-0.755853	-0.178838	0.0898975	-0.650103	2008-09-23
0.000398211	-0.00979284	-0.389298	-2.00783	-0.241275	2008-09-24
-0.0170227	0.00825823	0.0629365	0.325797	-0.0045168	2008-09-25
-0.131797	-0.0819158	-0.234775	0.107523	-0.22834	2008-09-26
-0.0385907	-0.0423307	-0.110549	-0.805423	-0.108679	2008-09-27
0.360628	0.381476	0.474952	1.19466	0.45922	2008-09-28
-0.0166344	-0.024378	0.0688218	0.0905798	0.051939	2008-09-29
0.0761013	0.0771209	-0.140188	0.0032276	0.00820041	2008-09-30
0.094474	0.0719168	0.13418	0.236332	0.130186	2008-10-01
0.340037	0.316726	-0.0101772	0.241813	0.253203	2008-10-02
-0.596541	-0.572386	-0.326975	-0.28195	-0.535686	2008-10-03
-0.242058	-0.235634	-0.308611	-0.323865	-0.280707	2008-10-04
0.532177	0.596561	0.386075	0.608645	0.627788	2008-10-05
0.118086	0.0519126	0.483278	0.132177	0.10139	2008-10-06
-0.0346825	-0.0618993	-0.00791412	-0.0993983	-0.0609831	2008-10-07
-0.205256	-0.165703	-0.121653	-0.221517	-0.134565	2008-10-08
0.044906	0.0349502	0.0125172	0.151538	0.00422229	2008-10-09
-0.362544	-0.334602	-0.391634	-0.34207	-0.418841	2008-10-10
-0.123434	-0.122002	-0.369442	-0.27019	-0.26176	2008-10-11
0.454021	0.399453	0.61453	0.474764	0.58426	2008-10-12
0.131846	0.113995	0.187661	0.279113	0.180179	2008-10-13
0.120595	0.0549769	0.106669	0.163217	0.109916	2008-10-14
0.0670669	0.0739549	0.161293	0.0912531	0.0891376	2008-10-15
0.079535	0.0389282	0.0739904	0.0481398	0.0487066	2008-10-16
-0.349482	-0.266644	-0.415702	-0.155112	-0.313371	2008-10-17
-0.0357606	-0.106031	0.016101	-0.0106796	-0.0429201	2008-10-18
0.117607	0.228616	0.187495	0.0797359	0.196033	2008-10-19
-0.0584381	-0.0501811	-0.163143	0.287313	-0.0742326	2008-10-20
0.105246	0.105355	0.13456	-0.134894	0.0814003	2008-10-21
0.0934848	0.0471907	0.192275	0.0366329	0.107148	2008-10-22
-0.196103	-0.173508	-0.221886	-0.0541992	-0.188146	2008-10-23
-0.230983	-0.233078	-0.39143	-0.253612	-0.310421	2008-10-24
-0.04597	-0.0398375	-0.080891	-0.0850985	-0.0420156	2008-10-25
0.516416	0.533533	0.325774	0.269977	0.451503	2008-10-26
0.0710669	0.064466	-0.0313024	0.11922	0.0961595	2008-10-27
-0.185226	-0.20363	0.0421255	0.00369919	-0.148598	2008-10-28
0.332857	0.365435	0.22735	0.18775	0.318068	2008-10-29
3.18745	1.3314	-0.0238601	-0.149965	-0.0443428	2008-10-30
-3.42593	-1.69337	0.0580569	-0.00606662	-0.146222	2008-10-31
-0.00812855	0.0290314	0.0292213	0.0912226	0.0327865	2008-11-01
0.0366331	0.0466442	-0.00133379	0.0823686	-0.020549	2008-11-02
-0.287829	-0.154079	-0.323646	-0.299847	-0.321857	2008-11-03
0.0373041	-0.145106	0.0171524	0.0239107	0.0790659	2008-11-04
0.217885	0.236838	0.161704	0.0590068	0.191742	2008-11-05
-0.0915744	0.579269	-0.354908	0.029396	-0.0282693	2008-11-06
-0.249965	-0.778792	-0.0638744	-0.297171	-0.197554	2008-11-07
-0.28072	-0.346715	-0.0674958	-0.318755	-0.320218	2008-11-08
0.283704	0.334505	0.360283	0.412346	0.317446	2008-11-09
0.045448	0.0767471	0.04613	-0.000273314	0.0316917	2008-11-10
0.0525541	0.0292749	0.47475	0.351133	0.466238	2008-11-11
0.0129652	-0.0161113	-0.363977	-0.0544249	-0.171659	2008-11-12
-0.0119323	0.0345497	-0.150773	-0.0996823	-0.16677	2008-11-13
-0.357693	-0.375483	-0.293414	-0.429946	-0.37807	2008-11-14
-0.178051	0.904853	-0.259334	-0.0826832	-0.299138	2008-11-15
0.249462	-0.813556	0.34401	0.253032	0.344359	2008-11-16
0.023496	-0.00197826	0.0503598	-0.0234543	0.0831426	2008-11-17
-0.00569294	0.0708773	-0.0713507	-0.11479	-0.120215	2008-11-18
0.0549049	1.93957	0.130981	0.218701	0.136745	2008-11-19
0.0186794	-1.60116	-0.176197	-0.115367	-0.0849078	2008-11-20
-0.194557	-0.42426	-0.0982138	-0.189977	-0.189148	2008-11-21
-0.160977	-0.275673	-0.0540586	-0.0842591	-0.221306	2008-11-22
0.338502	0.336138	0.385383	0.296272	0.516346	2008-11-23
-0.150588	-0.102911	-0.22324	-0.127226	-0.248378	2008-11-24
-0.03884	-0.0693306	0.0456849	0.0172291	0.0171386	2008-11-25
0.123282	0.121186	0.0406582	-0.026738	0.063664	2008-11-26
0.0375056	0.173102	-0.0544352	-0.0266587	-0.074395	2008-11-27
-0.252806	-0.283224	-0.378263	-0.393492	-0.351491	2008-11-28
-0.133461	-0.20619	-0.192641	-0.0976282	-0.39638	2008-11-29
0.283376	0.317915	0.50421	0.254719	0.585403	2008-11-30
0.0816859	0.456081	-0.0118802	0.080489	0.114252	2008-12-01
0.0651571	-0.194753	0.094824	0.0583611	0.0944547	2008-12-02
-0.193583	-0.0119753	-0.268524	0.0912411	-0.2383	2008-12-03
0.432752	0.152989	0.338278	0.164298	0.517169	2008-12-04
-0.242013	-0.264974	-0.237228	-0.329481	-0.399766	2008-12-05
-0.308578	-0.271376	-0.212909	-0.303867	-0.386497	2008-12-06
0.20372	0.119	0.351352	0.36658	0.43071	2008-12-07
0.0556295	0.0713452	-0.0211634	0.084484	0.0280827	2008-12-08
-0.0612386	1.62364	-0.0397212	0.0170744	-0.0549218	2008-12-09
0.0742207	-0.840449	0.143978	-0.0998808	0.181101	2008-12-10
-0.20705	-0.926418	-0.29332	-0.177528	-0.309688	2008-12-11
-0.103486	0.0483559	-0.218634	0.0169827	-0.177493	2008-12-12
-0.109349	0.372301	0.0998905	-0.221754	-0.127527	2008-12-13
0.124739	-0.5461	0.190385	0.321594	0.223873	2008-12-14
0.135219	0.113047	0.0701329	-0.0351424	0.139938	2008-12-15
0.0862413	0.0776621	0.128982	0.147814	0.132669	2008-12-16
0.00937988	0.0557598	-0.132875	-0.0447398	-0.0222714	2008-12-17
-0.161556	-0.00572133	-0.127023	-0.037852	-0.154935	2008-12-18
-0.171517	-0.314533	-0.199316	-0.418464	-0.304277	2008-12-19
-0.0399018	0.28038	0.228259	0.134378	0.0466548	2008-12-20
0.0794474	-0.291237	-0.0609832	0.11312	0.174627	2008-12-21
0.0541445	0.0690453	-0.0358763	-0.118813	-0.0642358	2008-12-22
-0.0106692	0.974283	0.0772797	-0.0146818	-0.0695299	2008-12-23
-0.135015	-0.058704	-0.218704	-0.0473334	-0.282989	2008-12-24
0.119835	-0.994923	0.253921	0.0806842	0.162627	2008-12-25
0.172864	0.163476	0.0386732	0.142073	0.339185	2008-12-26
0.086412	0.0689738	-0.0624666	0.10386	-0.0262462	2008-12-27
-0.0300912	0.125457	-0.0814326	-0.0348358	-0.0718964	2008-12-28
-0.0471198	0.286883	-0.195646	-0.172053	-0.110392	2008-12-29
0	0	0	0	0	2008-12-30
-0.0329163	-0.149896	-0.202963	-0.105633	-0.118688	2008-12-31
-0.179564	-0.510359	0.177591	0.0957397	0.0170046	2009-01-01
-0.00809484	-0.0346208	0.126088	0.0105632	0.0166781	2009-01-02
-0.00654252	-0.0514797	0.0606202	0.127244	0.0247122	2009-01-03
0.633041	0.567313	0.491693	0.442693	0.627924	2009-01-04
0.47553	0.488593	0.366199	0.209844	0.408892	2009-01-05
-0.108592	-0.00239747	-0.338258	-0.0736409	-0.261412	2009-01-06
-0.697674	-0.601166	-0.355078	-0.403237	-0.380219	2009-01-07
-0.0981692	-0.0813304	-0.0389004	-0.0695145	-0.0866481	2009-01-08
-0.0892679	-0.127396	-0.0823103	-0.0668917	-0.0868602	2009-01-09
-0.0127494	-0.00821266	0.0037868	0.0221312	-0.00705209	2009-01-10
0.213405	0.161748	0.39802	0.263287	0.308088	2009-01-11
0.147474	0.0920421	3.93267	0.222975	0.459994	2009-01-12
0.574621	0.49318	-3.47306	0.129156	0.110764	2009-01-13
1.64042	1.12949	-0.25822	0.0375225	-0.0879541	2009-01-14
-2.09968	-1.36084	-0.140033	-0.206772	-0.258093	2009-01-15
-0.384302	-0.471999	-0.185145	0.828781	-0.294801	2009-01-16
-0.0986501	-0.17112	0.313599	-0.953	-0.00679981	2009-01-17
0.1159	0.123214	3.35058	0.370542	0.605225	2009-01-18
0.518133	0.521484	-2.96471	-0.163926	0.0572806	2009-01-19
-0.0255226	0.0182867	-0.362475	0.135977	-0.26525	2009-01-20
0.0252252	0.186525	-0.177533	-0.0899472	0.0513866	2009-01-21
0.0478256	-0.0415132	-0.00704008	-0.0476467	-0.0797486	2009-01-22
0.648189	0.708275	-0.0908797	-0.180562	-0.0645513	2009-01-23
-1.15771	-0.888188	-0.082217	-0.202204	-0.328538	2009-01-24
0.120617	-0.195923	0.103552	0.182717	0.165018	2009-01-25
0.189416	0.16007	1.05902	0.271723	0.516695	2009-01-26
0.595189	0.470819	2.61643	0.230973	2.03128	2009-01-27
0.752364	0.547657	0.331079	2.45991	1.77044	2009-01-28
-0.545987	-0.445397	-2.27341	-0.209428	-2.86124	2009-01-29
-0.489948	-0.779255	-0.627063	-2.32556	-0.871093	2009-01-30
-0.323308	-0.207144	-0.814412	-0.122729	-0.417485	2009-01-31
0.430049	0.483134	0.328885	0.190499	0.407562	2009-02-01
-0.311	-0.105863	-0.260863	-0.135537	-0.262136	2009-02-02
0.0833377	0.124409	0.223732	-0.0053396	0.22984	2009-02-03
0.364778	0.360468	0.0478553	0.0746799	0.112158	2009-02-04
0.0765572	-0.01226	0.450488	0.0252664	0.00807963	2009-02-05
1.09801	-0.42015	0.505487	-0.148275	0.990349	2009-02-06
-0.0663349	0.997649	-1.30552	-0.949008	-1.41709	2009-02-07
-1.72076	0.23064	-0.469082	0.764634	-0.420792	2009-02-08
-0.322473	-1.24795	0.0395973	-0.0906582	0.00979615	2009-02-09
0.0628185	-0.166335	0.148735	0.0287646	0.156623	2009-02-10
-0.0616281	-0.220123	-0.00687173	0.0798407	0.0333245	2009-02-11
-0.0343145	-0.064427	-0.0145267	-0.112092	-0.0683934	2009-02-12
-0.117314	-0.124502	-0.358382	-0.42181	-0.341959	2009-02-13
-0.0403625	0.0164688	-0.255017	-0.0804104	-0.199459	2009-02-14
0.287546	0.309175	0.563781	0.395594	0.504863	2009-02-15
-0.139667	-0.150531	0.36284	0.237855	0.325784	2009-02-16
0.0937697	0.0975663	-0.114513	-0.200968	-0.259484	2009-02-17
0.19513	0.328723	0.0185868	0.204148	0.156341	2009-02-18
-0.0913384	1.10875	-0.172916	-0.174476	-0.218356	2009-02-19
-0.214689	-1.49841	-0.358864	-0.263268	-0.333247	2009-02-20
-0.0470615	-0.0990847	0.142605	-0.0787828	-0.0349268	2009-02-21
0.324379	0.321988	0.156665	0.304421	0.388658	2009-02-22
-0.017784	-0.0223138	-0.0875341	-0.000313109	-0.133372	2009-02-23
-0.0820356	-0.118853	0.00594585	-0.0241616	-0.0495005	2009-02-24
0.0880454	0.126698	0.47516	0.0194728	0.125694	2009-02-25
-0.165497	-0.179493	-0.410835	0.0176224	-0.0164732	2009-02-26
-0.223302	-0.217003	-0.37883	-0.439685	-0.365994	2009-02-27
-0.0547772	0.0859887	-0.149928	-0.00198371	-0.189161	2009-02-28
0.248176	0.425811	0.362448	0.399878	0.398926	2009-03-01
0.0683187	-0.114825	-0.0945135	-0.0176824	0.0474209	2009-03-02
-0.143661	0.115488	-0.131979	-0.397408	-0.147848	2009-03-03
0.00589531	-0.352314	0.249759	0.217141	0.155472	2009-03-04
-0.00931211	-0.0755003	0.110668	0.130503	0.0966092	2009-03-05
-0.111823	-0.126725	-0.352079	-0.377813	-0.314922	2009-03-06
-0.0469524	-0.0126826	-0.190717	-0.0477106	-0.118985	2009-03-07
0.118127	0.120544	0.153272	-0.0384509	0.125004	2009-03-08
0.0427948	0.0524383	0.152516	0.310421	0.061233	2009-03-09
0.101447	0.0552408	0.270628	0.0912508	0.247509	2009-03-10
0.0680851	0.0722906	0.114372	0.0586181	0.116537	2009-03-11
-0.114756	-0.106866	0.0277983	0.249117	0.00760863	2009-03-12
-0.0741843	-0.0515336	-0.533166	-0.617502	-0.395311	2009-03-13
0.166327	0.178911	0.2024	0.199599	0.193917	2009-03-14
0.0809675	0.356591	0.220315	-0.0680048	0.115185	2009-03-15
0.13111	0.0721062	0.095402	0.0752411	0.0565528	2009-03-16
-0.0749629	-0.277917	-0.0663746	0.0209616	-0.0412014	2009-03-17
0.12991	0.105297	0.0545644	0.0613693	0.130495	2009-03-18
0.0555019	-0.0725826	0.137195	0.138564	0.147018	2009-03-19
-0.119145	-0.250193	-0.182912	0.0136668	-0.147519	2009-03-20
-0.421994	-0.178764	-0.49925	-0.463466	-0.650512	2009-03-21
0.260646	0.285279	0.381659	0.162994	0.457533	2009-03-22
0.0356159	0.0176351	0.0471922	0.343537	0.0640715	2009-03-23
-0.0215747	-0.0475627	-0.0238511	-0.151613	-0.0385854	2009-03-24
-0.209523	-0.210664	-0.237082	-0.102703	-0.216979	2009-03-25
-0.00404055	-0.00125956	0.0266634	0.168447	-0.000216538	2009-03-26
-0.107357	-0.146419	-0.147053	-0.405065	-0.258961	2009-03-27
0.0727149	0.0550992	0.0953603	0.129217	0.142029	2009-03-28
0.23516	0.231594	0.231925	0.214664	0.25995	2009-03-29
0.0386955	0.00722635	1.79436	0.0263327	0.123616	2009-03-30
0.515963	0.48457	-1.2146	1.2386	0.547543	2009-03-31
0.245228	-0.0419546	0.0490764	-0.201705	0.159021	2009-04-01
-0.263746	-0.0866278	-0.349937	0.0915827	-0.282106	2009-04-02
-0.403564	-0.142486	-0.271408	-1.17155	-0.368887	2009-04-03
-0.0262042	-0.0419565	0.0547197	0.227999	0.0017831	2009-04-04
0.0579428	0.0258154	0.0749833	0.508149	0.138605	2009-04-05
0.00816929	-0.0895083	0.0150965	0.679473	-0.0168228	2009-04-06
-0.0638891	-0.0295339	-0.0587349	-0.942242	-0.0505676	2009-04-07
-0.0919173	-0.0598194	0.0671362	-0.173453	-0.0506706	2009-04-08
-0.15533	-0.180572	-0.101647	-0.149712	-0.152637	2009-04-09
0.0351935	0.0574038	-0.0456141	0.0314289	-0.0660392	2009-04-10
-0.112558	-0.0754197	-0.138271	0.173605	-0.147125	2009-04-11
0.045292	0.0350719	-0.0371143	-0.263598	0.0562489	2009-04-12
0.377835	0.298076	0.252001	0.1843	0.337051	2009-04-13
0.0763437	0.138466	-0.0688886	0.0467148	0.0434841	2009-04-14
-0.0359497	-0.0528533	0.0541579	0.212635	0.0144517	2009-04-15
0.0372156	0.0118779	0.0492597	-0.103999	-0.0205251	2009-04-16
-0.115798	-0.0819951	-0.0271504	-0.238376	-0.0567332	2009-04-17
-0.0418548	-0.013211	-0.0389732	-0.0190046	-0.102016	2009-04-18
0.334067	0.340655	0.22449	0.244023	0.39021	2009-04-19
0.0669641	0.0679938	-0.0345536	-0.0629226	0.0619314	2009-04-20
-0.173929	-0.190444	-0.0494951	-0.0975364	-0.151613	2009-04-21
-0.271228	-0.258174	-0.208735	-0.16316	-0.254012	2009-04-22
0.0626134	0.0275302	0.116272	0.00630765	0.0763099	2009-04-23
-0.226059	-0.200521	-0.203827	-0.012662	-0.274374	2009-04-24
0.392417	0.402763	0.415937	0.46185	0.450903	2009-04-25
0.48844	0.460777	0.372302	0.0726485	0.415913	2009-04-26
-0.130503	-0.174759	-0.0776371	0.388115	-0.0714797	2009-04-27
-0.0105862	-0.173589	-0.075508	0.114352	-0.0216971	2009-04-28
-0.0220838	-0.175933	-0.0563178	-0.614455	-0.0387362	2009-04-29
-0.389345	-0.0392891	-0.106093	-0.069237	-0.149154	2009-04-30
-0.194653	-0.184231	-0.284122	-0.28252	-0.319704	2009-05-01
-0.0120455	-0.0157663	0.0165453	-0.00034622	-0.0118503	2009-05-02
0.0733171	0.00435803	0.120328	0.0601008	0.165007	2009-05-03
0.205796	0.238459	0.10971	0.358112	0.145908	2009-05-04
-0.0498077	-0.0236684	-0.0232852	-0.0814939	-0.0625134	2009-05-05
-0.121606	-0.0726275	-0.102257	-0.283709	-0.160924	2009-05-06
0.134996	0.1133	0.00420974	0.225841	0.0503739	2009-05-07
-0.139977	-0.145446	0.0200301	-0.208037	-0.080846	2009-05-08
-0.164432	-0.117749	-0.261731	0.180051	-0.316965	2009-05-09
0.308433	0.272716	0.288205	-0.00760452	0.366868	2009-05-10
-0.0912945	-0.123376	-0.0593475	0.034195	-0.0847413	2009-05-11
-0.0969157	-0.0821701	-0.126165	-0.573674	-0.0556398	2009-05-12
-0.0839989	-0.080461	-0.250766	-0.473824	-0.137241	2009-05-13
0.0636101	0.0557845	-0.033191	-0.101199	0.0527101	2009-05-14
0.0344437	-0.0112343	0.25492	0.390509	0.0371093	2009-05-15
-0.0245283	0.0097355	0.0539939	0.612436	-0.0461906	2009-05-16
0.141042	0.147751	0.0793666	0.510905	0.208706	2009-05-17
-0.0774022	-0.0467326	-0.0879165	0.668086	-0.116854	2009-05-18
-0.0133907	-0.0351209	0.0126029	-0.901545	-0.0215357	2009-05-19
-0.117993	-0.169849	-0.115342	-0.224851	-0.0718996	2009-05-20
0.0274131	0.0522048	-0.0400637	-0.365482	0.0132582	2009-05-21
-0.149991	-0.156244	-0.218998	-0.670309	-0.271689	2009-05-22
0.0480882	0.0394974	0.273396	0.0865006	-0.0252627	2009-05-23
0.0793217	0.0418163	0.0898628	0.27832	0.169383	2009-05-24
-0.00368867	0.0122308	0.0318794	-0.194458	0.057485	2009-05-25
0.1381	0.103025	0.0829769	0.169943	0.0823414	2009-05-26
-0.111028	-0.0647977	-0.105516	0.199135	-0.108283	2009-05-27
0.226382	-0.0440704	0.602775	0.970975	0.245025	2009-05-28
-0.104247	-0.0586846	-0.433893	-0.781845	0.0206347	2009-05-29
0.0175051	0.0932436	-0.09075	0.626553	-0.00126743	2009-05-30
0.253164	0.125234	0.317039	1.24912	0.292369	2009-05-31
-0.0475143	-0.0118744	0.0675556	-0.640285	-0.00768311	2009-06-01
-0.168301	0.00584089	-0.266633	-1.25033	-0.203521	2009-06-02
0.100628	0.107387	0.0992992	-0.0751789	0.0601917	2009-06-03
-0.281929	-0.253445	-0.314197	-0.17874	-0.307071	2009-06-04
-0.0409964	-0.0563399	-0.0688642	-0.258161	0.00154086	2009-06-05
0.0412115	0.0740508	0.0138189	0.138811	0.0399488	2009-06-06
-0.156025	-0.125443	-0.194696	-0.139882	-0.196943	2009-06-07
0.204149	0.200007	0.175024	0.234679	0.223916	2009-06-08
0.437085	0.401557	0.506679	2.5587	0.450212	2009-06-09
1.45988	1.54288	-0.325624	0.646503	-0.164829	2009-06-10
-1.64425	-1.56302	0.000536105	-0.244361	-0.0577549	2009-06-11
-0.229816	-0.336001	-0.185426	-2.7444	-0.283024	2009-06-12
0.0304183	-9.02343e-05	0.0553242	0.485924	-0.0584707	2009-06-13
-0.0506262	-0.0138741	0.0747309	2.20139	0.136875	2009-06-14
-0.101656	-0.160226	-0.0235788	0.413054	-0.0558795	2009-06-15
-0.0461686	-0.0365789	-0.0404887	-1.41087	-0.0713425	2009-06-16
0.17504	0.220309	0.142017	0.0182346	0.209124	2009-06-17
-0.186686	-0.143612	-0.279769	1.10113	-0.274864	2009-06-18
-0.0742401	-0.121999	-0.142475	-2.98865	-0.10286	2009-06-19
-0.0454181	-0.00685338	0.0151019	-0.0413911	-0.0610361	2009-06-20
-0.00101236	0.0360903	-0.0271343	-0.0568607	0.04234	2009-06-21
0.0695726	0.0214438	0.135753	0.362043	0.126591	2009-06-22
0.0829264	0.0500425	0.0623437	0.412172	0.0495864	2009-06-23
0.11799	0.116877	0.100183	0.0697424	0.0837894	2009-06-24
-0.108372	-0.0984517	-0.0625816	-0.637946	-0.100483	2009-06-25
-0.0601633	-0.0598487	-0.084475	-0.392576	-0.0629273	2009-06-26
-0.140066	-0.0885822	-0.271758	-0.579013	-0.22057	2009-06-27
0.0652676	0.0501212	0.012722	0.424557	0.066671	2009-06-28
-0.0203585	-0.000580804	-0.099634	-0.13779	-0.122766	2009-06-29
-0.0413723	-0.0496608	0.0330415	0.107736	0.0302245	2009-06-30
0.984638	0.624053	0.323856	0.303938	0.414125	2009-07-01
-0.717535	-0.422315	-0.0745231	-0.154569	-0.134768	2009-07-02
-0.0748757	-0.0723509	0.108291	0.0262236	-0.0420649	2009-07-03
0.0958761	0.134515	0.124522	0.111988	0.104384	2009-07-04
1.37664	0.726776	0.072282	0.148508	0.0662035	2009-07-05
-1.23074	-0.673604	-0.0285987	-0.00147901	0.00541906	2009-07-06
0.0938558	0.0852042	0.107264	0.152654	0.20726	2009-07-07
-0.115663	-0.0399218	-0.156272	-0.167492	-0.14231	2009-07-08
-0.0999957	-0.0466325	-0.18838	-0.15961	-0.119631	2009-07-09
-0.0993564	-0.110125	-0.0621177	-0.0693998	-0.111959	2009-07-10
-0.0386963	-0.0215745	0.00923562	-0.00154369	-0.0343763	2009-07-11
0.120097	0.0489543	0.155022	0.169174	0.181542	2009-07-12
0.0733624	0.0753383	0.16225	0.161873	0.151436	2009-07-13
-0.0626202	-0.0441324	-0.133158	-0.166371	-0.16985	2009-07-14
0.332187	0.386983	0.235207	0.240115	0.249722	2009-07-15
-0.332272	-0.322577	-0.285495	-0.272684	-0.269943	2009-07-16
-0.145141	-0.216419	-0.162748	-0.146028	-0.163194	2009-07-17
-0.164353	-0.117821	-0.24705	-0.24595	-0.36855	2009-07-18
0.0423244	0.0396644	0.041409	0.131551	0.2091	2009-07-19
0.0226943	0.017178	0.0401749	0.00418287	0.0543126	2009-07-20
-0.00563386	-0.00369522	0.149404	0.123205	0.0841557	2009-07-21
0.315548	0.206847	0.416474	0.324317	0.375912	2009-07-22
-0.0997618	-0.0435264	-0.19921	-0.117402	-0.151005	2009-07-23
-0.044549	-0.0025473	-0.0757476	-0.117552	-0.0979415	2009-07-24
-0.0413809	-0.0200742	-0.153031	-0.162261	-0.140593	2009-07-25
0.0284838	0.00178239	0.0413215	0.0364811	0.0677183	2009-07-26
0.1321	0.138022	0.127244	0.0962093	0.103409	2009-07-27
-0.137627	-0.137815	-0.0410569	-0.0824685	-0.120051	2009-07-28
0.0622119	0.0199362	-0.00239233	0.0647619	0.0710997	2009-07-29
-0.154916	-0.0354996	-0.125218	-0.135485	-0.154766	2009-07-30
0.0654194	-0.00621659	0.065484	0.065771	0.0364445	2009-07-31
-0.0689952	-0.0630645	-0.293896	-0.181315	-0.184259	2009-08-01
0.221124	0.199222	0.4544	0.430349	0.347529	2009-08-02
-0.0226173	-0.0348421	0.134412	0.00403184	0.0292166	2009-08-03
-0.0903254	-0.0522726	-0.156465	-0.0957278	-0.0920232	2009-08-04
-0.110218	-0.079148	-0.460795	-0.379683	-0.251012	2009-08-05
-0.0178677	-0.0369015	0.199731	0.0309993	0.0400215	2009-08-06
0.0455476	0.0452326	0.00961773	-0.0258996	0.0306256	2009-08-07
0.0675696	0.0979866	0.050768	0.0850723	0.050999	2009-08-08
0.00363984	-0.0699831	0.0635235	0.235086	0.109912	2009-08-09
0.110268	0.0598044	0.110703	0.0325011	0.10662	2009-08-10
-0.154622	-0.117825	0.0546233	-0.0216519	-0.0749382	2009-08-11
-0.0666792	-0.0967541	-0.102184	-0.134461	-0.104478	2009-08-12
-0.0588937	-0.0213149	-0.177228	-0.0945625	-0.108105	2009-08-13
-0.139989	-0.107645	-0.530736	-0.436196	-0.335336	2009-08-14
-0.0481159	-0.0447593	0.0328324	-0.00666382	-0.036629	2009-08-15
0.104341	0.0664659	0.455064	0.399625	0.345432	2009-08-16
0.29013	0.020687	0.238844	0.261331	0.255495	2009-08-17
-0.0386053	0.0709287	-0.192304	-0.128244	-0.0748516	2009-08-18
-0.0635212	0.946061	0.00821669	-0.0302	-0.0624229	2009-08-19
-0.136092	-1.04902	-0.108499	-0.169528	-0.159637	2009-08-20
0.0283465	0.0617616	0.0198361	0.0279342	0.0551212	2009-08-21
-0.104142	-0.0852993	-0.134315	-0.157949	-0.158494	2009-08-22
0.332476	-0.0322699	0.354452	0.201749	0.374406	2009-08-23
-0.0919623	0.218237	-0.0720204	0.118862	-0.0442133	2009-08-24
-0.078278	-0.0214516	-0.0402182	0.662191	-0.0248258	2009-08-25
0.00236685	-0.0113787	0.0426633	-0.678458	0.0140975	2009-08-26
0.0707395	0.129017	0.103179	0.144385	0.0618306	2009-08-27
-0.0637439	-0.061987	-0.269901	-0.212471	-0.156168	2009-08-28
-0.0664817	-0.0464842	-0.165451	-0.275856	-0.190782	2009-08-29
0.0661168	0.0431144	0.189222	0.228342	0.162271	2009-08-30
0.0766966	0.0510042	0.188462	0.0858952	0.0846688	2009-08-31
-0.107364	-0.0694201	-0.606114	-0.507131	-0.550281	2009-09-01
-0.0143345	-0.0263268	0.195661	1.4528	0.2844	2009-09-02
0.0411758	0.0310835	0.217422	-1.07297	0.091654	2009-09-03
-0.0130343	-0.00306137	0.0678787	-0.227826	-0.0182434	2009-09-04
0.0176098	0.0398946	-0.162858	0.0067965	-0.0647123	2009-09-05
0.41576	0.386992	0.38657	0.605119	0.555571	2009-09-06
-0.117462	-0.163528	0.0698246	-0.0586166	-0.074157	2009-09-07
-0.0349187	-0.0263209	0.079019	0.0274898	0.00720146	2009-09-08
-0.230644	-0.187828	-0.241942	-0.306428	-0.268785	2009-09-09
-0.0450929	-0.0507943	1.31784	-0.0996072	-0.1572	2009-09-10
-0.0737694	-0.0914076	-1.92964	-0.449127	-0.29143	2009-09-11
-0.0136401	-0.0432045	0.0189485	0.0974497	0.0377027	2009-09-12
0.0961596	0.149442	0.656056	0.440817	0.403552	2009-09-13
0.076046	0.0459973	-0.0476823	0.166182	0.0782306	2009-09-14
-0.0621527	-0.0444468	-0.114922	-0.0693457	-0.0533122	2009-09-15
0.269891	0.268379	0.20583	0.269829	0.24165	2009-09-16
-0.205042	-0.188663	-0.0655619	-0.138338	-0.154571	2009-09-17
-0.0638472	-0.0480905	-0.105602	-0.162667	-0.117214	2009-09-18
-0.0600544	-0.0353534	0.0141345	-0.0437728	-0.0670419	2009-09-19
0.131991	0.113881	0.167523	0.151429	0.162919	2009-09-20
0.095432	0.00808744	0.157276	0.128867	0.112334	2009-09-21
-0.165636	-0.122546	-0.330414	-0.182914	-0.179464	2009-09-22
-0.0637424	-0.0486755	-0.175289	-0.0993069	-0.0884416	2009-09-23
0.0764795	0.0635864	0.181427	0.0676084	0.104075	2009-09-24
0.0777863	0.166825	0.136745	0.121343	0.115564	2009-09-25
0.136521	0.0902441	0.119647	0.109746	0.121791	2009-09-26
-0.0875463	-0.124457	-0.0144359	-0.0199432	-0.0163676	2009-09-27
-0.0984623	-0.0472508	-0.247926	-0.181951	-0.172034	2009-09-28
0.0541143	0.0658681	-0.0835837	-0.0195526	-0.0441881	2009-09-29
0.0231146	0.025908	0.129846	-0.0328378	0.0320297	2009-09-30
0.0538392	0.0568292	0.0416096	-0.216477	0.0759448	2009-10-01
-0.0511186	-0.0590878	0.00286171	0.393818	-0.12494	2009-10-02
-0.0533538	-0.0225227	-0.00119995	0.0279833	-0.105757	2009-10-03
0.148695	0.0852899	0.110395	-0.669688	0.301119	2009-10-04
0.367076	0.440376	0.312591	0.900922	0.326052	2009-10-05
-0.329775	-0.356086	-0.24737	-0.109581	-0.309901	2009-10-06
-0.0296205	-0.112543	-0.0232399	-0.0090246	0.0159674	2009-10-07
0.112078	0.0801824	0.0973473	0.0754227	0.120018	2009-10-08
-0.234023	-0.250863	-0.246251	-0.164823	-0.265366	2009-10-09
-0.109683	-0.0532993	-0.218716	-0.34717	-0.264314	2009-10-10
0.0958534	0.0749269	0.0223913	0.200893	0.208849	2009-10-11
-0.0107623	0.0571213	0.128968	0.1448	0.094724	2009-10-12
0.0449096	0.0395653	-0.0231568	-0.152959	0.00339405	2009-10-13
0.0098202	-0.00034905	0.0266694	0.173317	0.00151969	2009-10-14
0.171825	0.101813	0.307343	0.17972	0.222806	2009-10-15
-0.244017	-0.174853	-0.177359	-0.0750769	-0.202146	2009-10-16
-0.157236	-0.163297	-0.201899	-0.134055	-0.230519	2009-10-17
0.13985	0.145363	0.098141	0.138749	0.125542	2009-10-18
-0.0272916	-0.0628786	-0.12017	-0.0330672	-0.100953	2009-10-19
0.412902	0.360935	0.265271	0.0307451	0.303758	2009-10-20
-0.317777	-0.268852	-0.0940649	0.0177825	-0.126237	2009-10-21
-0.0505038	-0.0440609	-0.0341459	-0.0379694	-0.0494645	2009-10-22
-0.193637	-0.203574	-0.180735	-0.131589	-0.196594	2009-10-23
-0.0277419	0.0170938	-0.161447	-0.0165439	-0.0961096	2009-10-24
0.146869	0.115863	0.18223	0.111571	0.201321	2009-10-25
0.0722171	0.013617	0.137146	0.0398765	0.102347	2009-10-26
-0.0625274	-0.047017	0.0127731	0.0444686	-0.0697985	2009-10-27
0.13694	0.105787	1.01441	0.0287392	0.149988	2009-10-28
0.172081	0.159528	-0.647013	0.754383	0.138328	2009-10-29
-0.155591	-0.127477	-0.359443	-0.836411	-0.200685	2009-10-30
-0.0141447	-0.032593	0.0399344	0.00149068	0.00652298	2009-10-31
0.0883201	0.146235	2.33368	0.0827744	0.105629	2009-11-01
2.13535	2.05985	-2.27088	-0.0582131	0.245851	2009-11-02
-2.26945	-2.10169	-0.00476061	0.0461087	-0.301343	2009-11-03
-0.135201	-0.105002	-0.0578982	0.0418927	-0.089447	2009-11-04
-0.0445959	-0.111733	-0.0730217	0.0413332	-0.0512116	2009-11-05
-0.0257506	-0.0556777	-0.035721	-0.151384	-0.0506478	2009-11-06
0.00310202	-0.0131634	0.137555	0.141814	0.211262	2009-11-07
0.155077	0.0979926	0.539134	0.110262	0.27995	2009-11-08
0.16058	0.157288	2.80666	0.119497	0.539796	2009-11-09
0.159711	0.203151	0.220721	0.0157908	-0.2995	2009-11-10
-0.104993	-0.118739	-0.0893706	-0.0768702	-0.370923	2009-11-11
-0.20861	-0.307783	-0.4681	-0.132595	-0.157601	2009-11-12
-0.0420638	0.0047184	-2.79409	0.00659804	-0.086381	2009-11-13
-0.0370775	-0.0195194	0.974875	-0.00381029	-0.00938528	2009-11-14
1.03309	1.0788	-0.954611	0.0161265	0.112195	2009-11-15
-0.952623	-0.576623	-0.386657	-0.0906431	-0.163037	2009-11-16
0.07072	-0.24506	0.122226	-0.0238929	0.107478	2009-11-17
2.59627	2.41244	4.1816	0.186894	1.68516	2009-11-18
1.1398	0.7669	-3.95461	-0.154458	-1.42763	2009-11-19
-3.34582	-2.87024	-0.26498	0.115666	-0.246121	2009-11-20
0.700613	0.719044	-0.118627	-0.233347	0.0774481	2009-11-21
-1.00217	-0.675622	0.166621	0.128515	-0.0492969	2009-11-22
-0.109275	-0.349708	-0.100017	-0.0545657	-0.066334	2009-11-23
0.33985	0.31847	0.230943	0.134394	0.236381	2009-11-24
1.27211	1.26611	0.0346816	0.0210197	0.0242424	2009-11-25
1.41108	1.30113	-0.223698	-0.100255	-0.100796	2009-11-26
-2.30816	-2.20754	-0.166872	-0.125291	-0.250525	2009-11-27
-0.733402	-0.657947	-0.00696274	0.198685	-0.0506335	2009-11-28
-0.00490806	0.036124	0.161337	0.0630299	0.155343	2009-11-29
-0.0816841	-0.207806	0.0218364	-0.11989	-0.0050723	2009-11-30
0.0053472	-0.0845479	0.006229	0.013575	0.0137587	2009-12-01
-0.0632697	-0.0338133	-0.166989	-0.227224	-0.120765	2009-12-02
-0.0413862	-0.00152912	-0.0164953	-0.0646779	-0.0644502	2009-12-03
-0.0597862	-0.0521796	-0.110106	0.0558758	-0.116023	2009-12-04
-0.000565879	0.0417435	0.00244547	0.0276043	-0.00762616	2009-12-05
4.06447	1.06904	0.20962	0.532369	0.223027	2009-12-06
-1.45631	0.336532	-0.131195	0.235829	-0.0994439	2009-12-07
-2.35222	-0.701642	0.15228	-0.148076	0.121594	2009-12-08
-0.0288578	-0.0438919	-0.195259	-0.120446	-0.0681256	2009-12-09
-0.142321	-0.282486	0.0141472	-0.295282	-0.0792961	2009-12-10
-0.0692412	-0.365314	-0.0228245	-0.124665	-0.132825	2009-12-11
0.0502938	0.110134	0.0642472	-0.045303	0.0838227	2009-12-12
0.146494	0.125985	0.180106	0.103163	0.233295	2009-12-13
0.150472	0.078791	0.181702	0.128202	0.148307	2009-12-14
1.08933	0.436456	0.654222	-0.0644404	0.615208	2009-12-15
2.24863	1.10725	-0.914769	-0.146774	-0.740707	2009-12-16
-3.597	-1.8197	-0.196745	-0.0873479	-0.257312	2009-12-17
-0.044096	-0.0652278	0.196945	0.351471	0.0170657	2009-12-18
-0.102408	-0.0903855	-0.133018	-0.329147	-0.166619	2009-12-19
0.272664	0.292287	0.263555	0.144757	0.397257	2009-12-20
0.135644	0.0751134	0.154065	0.0460186	0.0896383	2009-12-21
0.122522	0.1641	-0.128182	-0.0439342	0.0594516	2009-12-22
-0.154952	-0.245043	-0.375972	-0.283068	-0.36319	2009-12-23
-0.403699	-0.376485	-0.39374	-0.10495	-0.374452	2009-12-24
-0.0397029	-0.0278208	0.258033	0.0767569	0.109125	2009-12-25
0.123668	0.175907	0.181198	0.0506859	0.135646	2009-12-26
0.0519658	0.0450703	0.167245	-0.0157492	0.0979913	2009-12-27
0.208019	0.295486	0.0895378	0.152885	0.217772	2009-12-28
0.0937471	0.0438021	0.261111	0.0644545	0.184154	2009-12-29
-0.113076	-0.134189	-0.110312	0.112067	-0.0694911	2009-12-30
-0.252896	-0.22874	-0.514841	-0.333425	-0.42781	2009-12-31
0.00510398	0.0660483	-0.266121	-0.306965	-0.173508	2010-01-01
-0.0109168	0.0604161	0.299998	0.191722	0.150266	2010-01-02
0.0591228	-0.0199345	0.198496	0.33069	0.167542	2010-01-03
0.108603	0.0657132	0.105485	-0.00239664	0.104069	2010-01-04
0.0207346	0.0370958	-0.00930557	0.0177211	-0.0105188	2010-01-05
-0.0500166	-0.0689816	0.0327762	0.111327	-0.0137524	2010-01-06
0.169503	0.132728	3.25431	-0.050346	0.199742	2010-01-07
0.461049	0.206432	-2.60502	0.290082	0.429742	2010-01-08
-0.153387	-0.0126677	0.980328	-0.106401	-0.321449	2010-01-09
0.13377	0.23934	2.42911	0.00889915	3.61751	2010-01-10
1.14713	-0.264937	-3.91575	-0.110751	-3.393	2010-01-11
-1.69433	-0.238693	-0.344546	-0.143499	-0.566025	2010-01-12
-0.195158	0.0433625	-0.0467881	-0.101824	-0.102411	2010-01-13
0.0751793	-0.128734	1.56254	0.119202	0.140381	2010-01-14
0.0482627	0.0065791	-1.39932	-0.0736215	0.00802429	2010-01-15
-0.245527	-0.0945878	-0.626316	-0.349186	-0.547431	2010-01-16
0.0840385	3.70171	0.433435	0.168984	0.347425	2010-01-17
0.0939504	-3.57134	0.211109	0.0498017	0.121353	2010-01-18
0.0938632	0.0693218	0.0321517	0.0595238	0.0605179	2010-01-19
0.723645	1.49022	0.389471	0.194774	0.206144	2010-01-20
2.39778	-1.00622	-0.17571	0.0378564	0.117016	2010-01-21
-1.36222	-0.467835	-0.36825	-0.192291	-0.382933	2010-01-22
-1.7902	-0.0245436	0.0752943	-0.0574433	0.0110916	2010-01-23
0.232394	0.279671	0.210082	0.133006	0.218015	2010-01-24
0.104186	-0.00537097	-0.0716628	-0.0159485	-0.0380781	2010-01-25
-0.052789	0.44948	0.0060034	0.00864206	0.0396478	2010-01-26
0.0299715	-0.181006	0.163429	0.0713173	0.104187	2010-01-27
-0.15947	-0.457752	-0.273905	-0.0858928	-0.184355	2010-01-28
-0.016703	-0.0882261	0.112617	0.0402456	0.0706074	2010-01-29
0.101931	0.119989	-0.0421851	-0.0298299	0.0788321	2010-01-30
-0.0978494	-0.0718332	-0.100708	0.00124119	-0.138258	2010-01-31
0.0255991	0.0564834	1.82002	0.0225861	1.76504	2010-02-01
0.165671	0.138922	0.315314	0.106472	0.315888	2010-02-02
2.29345	-0.171942	-1.936	-0.0524679	-1.97802	2010-02-03
-2.41158	0.127755	-0.14785	-0.0867756	-0.0806119	2010-02-04
-0.264152	-0.315213	-0.142187	-0.0414065	-0.187233	2010-02-05
-0.0286964	-0.114059	0.109522	-0.00108408	0.0436844	2010-02-06
0.249454	0.291715	3.01946	0.404088	2.80079	2010-02-07
0.190863	0.189477	1.33778	-0.193263	0.254041	2010-02-08
0.200806	0.120895	-1.33983	0.188595	-1.42741	2010-02-09
1.0015	-0.233401	-2.70125	-0.164423	-1.20098	2010-02-10
1.07351	0.294029	-0.0433108	-0.0239419	-0.106297	2010-02-11
-2.49382	-0.343332	-0.0426809	-0.152806	-0.168023	2010-02-12
0.00414855	0.015513	-0.0861619	-0.0260078	-0.00322507	2010-02-13
0.202736	2.79708	0.094283	0.09609	0.146451	2010-02-14
-0.271132	-2.87988	-0.0996371	-0.0914696	-0.168242	2010-02-15
-0.0818293	-0.188759	-0.0981711	-0.0361087	-0.0792239	2010-02-16
-0.0144304	-0.0782518	-0.0177232	-0.0344342	-0.0251511	2010-02-17
0.0947377	0.0196868	0.283308	0.16301	0.268866	2010-02-18
-0.19578	-0.151056	0.0515672	0.00187259	0.00971095	2010-02-19
0.206744	0.256111	-0.229135	-0.134074	-0.178152	2010-02-20
2.14491	0.441123	-0.0137579	0.0371448	0.217408	2010-02-21
-2.00054	-0.185034	0.019219	0.0497321	-0.111328	2010-02-22
-0.15617	-0.205759	-0.0426198	-0.0293954	-0.0565722	2010-02-23
-0.0432032	-0.0417467	0.0393733	0.0311532	0.0202305	2010-02-24
-0.0257126	-0.0187206	0.192883	0.0161597	0.0523939	2010-02-25
-0.0366542	-0.0665005	-0.323882	-0.157185	-0.236903	2010-02-26
-0.0925281	-0.011571	-0.365373	-0.129115	-0.188079	2010-02-27
0.00932062	0.0343542	0.082344	0.206474	0.0587649	2010-02-28
0.0589773	0.0149655	0.184281	-0.127758	0.106913	2010-03-01
-0.0181197	-0.0316878	0.11915	0.0744524	0.0380306	2010-03-02
0.11743	0.108731	0.125939	0.0401775	0.0800086	2010-03-03
0.0690833	0.0671983	0.0135877	0.0503744	0.099116	2010-03-04
-0.130884	-0.116019	-0.182173	-0.104638	-0.169859	2010-03-05
-0.0391027	0.160545	-0.0734111	-0.0899467	-0.0684915	2010-03-06
-0.00152023	0.13622	-0.21612	-0.192473	-0.14355	2010-03-07
0.166775	0.713392	0.174762	0.103931	0.0766007	2010-03-08
-0.173549	-0.188001	-0.0251843	0.0948244	0.00793534	2010-03-09
-0.0600634	-0.909133	0.0049507	0.0173968	-0.0127112	2010-03-10
0.0171683	-0.0713135	0.0257046	-0.00589925	0.0447883	2010-03-11
0.00375454	-0.0572162	0.0518911	-0.0136481	-0.0282937	2010-03-12
-0.0582058	0.010428	-0.0798851	0.00144787	-0.0634369	2010-03-13
0.315648	0.200969	0.38884	0.242491	0.371005	2010-03-14
0.102956	-0.00854644	0.103258	0.0489244	0.0990625	2010-03-15
-0.0527824	0.0957147	-0.0505395	0.00359675	-0.0558664	2010-03-16
-0.0186957	0.0764712	-0.0176048	-0.102332	-0.0605586	2010-03-17
0.0758384	0.0392334	-0.0326112	0.0380149	0.0625703	2010-03-18
-0.120547	-0.170623	-0.141128	-0.0934202	-0.176371	2010-03-19
-0.142566	-0.0816633	-0.225736	-0.135465	-0.208058	2010-03-20
0.0564171	0.117051	0.123748	0.0853802	0.131791	2010-03-21
-0.0294384	-0.059034	-0.0545378	-0.131187	-0.0914483	2010-03-22
0.0665193	0.0625949	0.106045	0.138513	0.0672606	2010-03-23
0.152301	0.156221	0.110817	0.0782175	0.194902	2010-03-24
0.932137	-0.0484416	-0.0294405	-0.0746185	-0.0857366	2010-03-25
-1.12143	-0.131939	-0.0436204	-0.049963	-0.144792	2010-03-26
-0.0620712	-0.0506457	-0.194899	-0.107264	-0.0934917	2010-03-27
0.203173	0.23603	0.33349	0.130899	0.239501	2010-03-28
-0.0784761	-0.0901166	-0.197521	-0.0508098	-0.132699	2010-03-29
-0.133461	-0.129176	-0.0636459	-0.00724184	-0.00593545	2010-03-30
-0.0276317	-0.0939713	-0.0350674	-0.0040898	-0.00104031	2010-03-31
-0.0221431	-0.0130379	-0.0721356	-0.0917802	-0.0634045	2010-04-01
-0.0396456	-0.0722345	-0.0879053	0.161428	-0.0515791	2010-04-02
-0.00590851	-0.0138529	0.0399647	-0.101575	-0.000543141	2010-04-03
-0.0461757	-0.0766538	0.0315839	-0.0407549	0.0076239	2010-04-04
0.104159	0.175406	0.100971	0.0598422	0.134312	2010-04-05
0.070167	0.0631621	0.123032	0.0319393	0.0992717	2010-04-06
0.0452723	0.1035	0.0139976	-0.0725756	-0.0029311	2010-04-07
0.00198757	0.0277404	0.0646451	0.04434	0.039532	2010-04-08
-0.0238236	-0.0167905	-0.0305207	-0.0538534	-0.066953	2010-04-09
-0.0370895	0.175399	-0.199472	-0.0093371	-0.12474	2010-04-10
0.0214108	-0.197465	0.33723	0.00299201	0.16391	2010-04-11
1.39432	-0.0901397	-0.00714467	0.0782332	0.0779542	2010-04-12
-1.42517	-0.00672379	-0.0146104	0.0331794	-0.0130106	2010-04-13
-0.0304975	-0.0667006	0.247211	0.210539	0.250974	2010-04-14
-0.0177488	-0.0884528	-0.330748	-0.212658	-0.298856	2010-04-15
0.148248	0.305873	0.355487	0.0273353	0.0392757	2010-04-16
-0.102249	-0.0686242	-0.392894	-0.258554	-0.175324	2010-04-17
0.025839	-0.0136891	0.0484397	0.17643	0.0754093	2010-04-18
-0.0327512	-0.00997204	0.494781	-0.00417124	0.800826	2010-04-19
0.030149	0.0335565	1.05542	-0.00107468	1.24048	2010-04-20
0.09608	0.155303	-1.51054	-0.00056821	1.964	2010-04-21
-0.104716	-0.139734	-0.168737	2.38938e-06	-3.99272	2010-04-22
-0.076279	-0.115084	-0.12137	-0.124338	-0.13583	2010-04-23
0.0192794	-0.000869524	0.132957	0.000963949	0.00575426	2010-04-24
-0.0757272	-0.100611	-0.150514	-0.00830826	-0.092421	2010-04-25
0.113198	0.0851105	0.542818	0.390332	0.503939	2010-04-26
-0.0356049	-0.0255092	-0.300898	-0.175782	-0.136763	2010-04-27
0.037335	0.0600276	0.0301797	0.00420384	-0.0208	2010-04-28
0.089339	0.0244891	0.117901	0.00749124	0.054769	2010-04-29
-0.0619308	-0.113195	-0.184435	-0.118643	-0.161899	2010-04-30
-0.0597571	-0.00964857	-0.0513869	-0.174656	-0.0634853	2010-05-01
0.0637959	0.0786698	0.0552645	0.0941973	0.0774745	2010-05-02
-0.0185712	-0.0111771	-0.0658825	0.00534374	-0.0629449	2010-05-03
0.0967514	0.0697076	0.164626	0.118387	0.160704	2010-05-04
-0.0663226	-0.058001	-0.0667904	-0.241328	-0.0780874	2010-05-05
0.0317609	0.0760962	-0.0105341	0.0356525	0.0198955	2010-05-06
-0.060623	-0.0592615	-0.0566243	0.0175773	-0.0901375	2010-05-07
0.0295668	0.0869479	-0.0457294	-0.0131633	-0.0625338	2010-05-08
0.153481	0.0751425	0.069518	0.137763	0.186804	2010-05-09
0.0571535	-0.0581489	0.173037	0.170367	0.160417	2010-05-10
0.209881	0.129886	0.279759	0.45787	0.283481	2010-05-11
-0.206082	0.394083	-0.258671	-0.154079	-0.204899	2010-05-12
0.217145	-0.678148	0.18996	0.834564	0.206633	2010-05-13
-0.0287085	-0.00441216	-0.0769554	0.39374	-0.0977973	2010-05-14
-0.0239507	0.213376	-0.00567365	-0.414051	0.0393115	2010-05-15
0.138406	-0.130637	0.21147	-0.0622591	0.16166	2010-05-16
-0.14474	0.104476	-0.13399	-0.588664	-0.0839443	2010-05-17
-0.237117	-0.172164	-0.0883442	-0.0931152	-0.0906978	2010-05-18
-0.0373595	-0.00416977	-0.043477	0.0325554	-0.121853	2010-05-19
-0.0693718	-0.126501	0.0149115	-0.172959	-0.0215592	2010-05-20
0.128582	-0.038444	0.0941202	2.67421	0.123602	2010-05-21
-0.0733416	0.177154	-0.37911	-1.70533	-0.314618	2010-05-22
-0.0308475	-0.156948	0.275653	-0.975849	0.158147	2010-05-23
0.215113	0.0948035	0.139575	0.0316309	0.115863	2010-05-24
-0.012582	0.00839684	-0.0922277	1.08224	-0.11144	2010-05-25
-0.0689901	-0.111556	-0.0679491	-1.11331	-0.0764398	2010-05-26
-0.172417	0.0311301	-0.192937	-0.100626	-0.16188	2010-05-27
-0.00272966	0.0904493	-0.0347358	-0.142433	-0.0378958	2010-05-28
-0.0949817	-0.0161686	-0.198334	-0.123589	-0.178979	2010-05-29
0.200802	0.213055	0.371234	0.186386	0.304261	2010-05-30
0.0329071	-0.0904663	0.085308	0.0475747	0.0895345	2010-05-31
-0.00908825	-0.134662	0.00634734	-0.00813179	0.014993	2010-06-01
0.0477558	0.239645	0.110998	0.0642686	0.132194	2010-06-02
0.0492601	-0.0411504	0.0130911	0.122384	0.0328666	2010-06-03
0.51281	0.0235587	0.35997	0.348234	0.402377	2010-06-04
-0.142659	0.130039	-0.148971	-0.164008	-0.205957	2010-06-05
-0.123966	0.0366696	-0.0972271	-0.142801	-0.13723	2010-06-06
-0.360536	-0.24188	-0.322134	-0.212519	-0.321267	2010-06-07
-0.11421	-0.0113871	-0.192182	-0.145138	-0.130313	2010-06-08
0.152948	0.14792	0.212966	0.087272	0.144905	2010-06-09
-0.0865355	-0.0736993	-0.106329	-0.119709	-0.0943989	2010-06-10
0.189304	0.010732	0.331904	0.282916	-0.0357704	2010-06-11
-0.139967	-0.0536759	-0.291845	-0.210406	-0.025892	2010-06-12
0.0667609	-0.090299	0.27977	0.0026076	0.0362537	2010-06-13
-0.0462571	-0.0118978	0.113326	0.0818946	0.13283	2010-06-14
-0.203797	-0.075716	-0.542099	-0.204643	-0.19729	2010-06-15
-0.00800902	0.0102379	-0.0417173	-0.155608	-0.0737756	2010-06-16
0.00320362	0.0109695	0.0122694	0.0234141	-0.00640615	2010-06-17
0.0210372	-0.100114	0.029753	-0.0184952	-0.129027	2010-06-18
0.0737771	0.0924764	0.160361	0.0423137	0.138136	2010-06-19
0.292233	0.16297	0.956526	1.11062	1.16709	2010-06-20
-0.0609543	-0.0803994	-0.755723	-0.687008	-0.730876	2010-06-21
-0.155099	0.0740486	-0.1454	-0.158822	-0.12405	2010-06-22
-0.171013	-0.101864	-0.24384	-0.231898	-0.230493	2010-06-23
0.0145242	-0.036603	0.0279048	-0.0142106	-0.0373215	2010-06-24
0.386823	0.144626	0.323215	0.284892	0.336948	2010-06-25
0.0470702	0.20318	0.0738483	0.0167662	0.0666482	2010-06-26
-0.0188714	0.0741549	-0.0865047	0.00336918	-0.0136259	2010-06-27
1.44589	0.135987	0.377342	0.226783	0.26057	2010-06-28
-1.4252	-0.132846	0.015079	-0.115113	-0.212134	2010-06-29
-0.155995	-0.21098	-0.118568	-0.0636297	-0.0847812	2010-06-30
0.0419896	0.00611446	-0.189895	0.0593482	-0.0136398	2010-07-01
-0.0484723	-0.0714959	-0.117944	-0.03721	-0.147591	2010-07-02
0.00494458	0.13178	-0.0626521	-0.0109068	-0.0656065	2010-07-03
-0.0740484	-0.103808	0.0770149	0.0338886	0.152635	2010-07-04
-0.0466288	-0.0915064	-0.0256186	-0.0465266	-0.0337515	2010-07-05
0.115641	0.0963074	0.111057	0.177386	0.0234171	2010-07-06
-0.0713089	-0.0646117	-0.0621275	0.0263405	-0.0712237	2010-07-07
-0.0840934	-0.0866136	-0.227053	-0.286858	-0.120807	2010-07-08
-0.0571178	-0.108921	-0.21424	-0.103967	-0.0927751	2010-07-09
-0.077347	0.0366569	-0.0078904	-0.174885	-0.109492	2010-07-10
0.0697456	0.0284043	0.149727	0.0772708	0.12654	2010-07-11
-0.0493203	-0.0271288	-0.217969	-0.148678	-0.103301	2010-07-12
0.029173	0.0519097	0.0532264	0.0552334	0.128441	2010-07-13
0.0728361	0.0593687	0.267235	0.0867492	0.0734131	2010-07-14
0.019781	0.00585404	-0.0196211	0.0379657	-0.0462553	2010-07-15
-0.0444706	0.0133912	-0.192982	0.140617	-0.120809	2010-07-16
0.0404542	0.0600165	0.216917	-0.222863	0.137647	2010-07-17
0.0801953	-0.0102975	0.101107	0.173361	0.130936	2010-07-18
0.0816221	0.078521	0.0873238	0.141903	0.143157	2010-07-19
-0.000951209	0.0139058	-0.00613911	0.00140824	-0.042577	2010-07-20
0.0948914	0.051901	0.0634912	-0.00871763	0.0862822	2010-07-21
-0.0550267	-0.10217	-0.0228529	-0.0360435	-0.034024	2010-07-22
-0.0279268	-0.118076	0.0472736	0.0264429	0.0202062	2010-07-23
-0.0416986	0.0633651	-0.146768	-0.0996534	-0.124789	2010-07-24
0.141764	0.100094	0.112205	0.0376066	0.144609	2010-07-25
-0.183691	-0.099636	-0.151463	-0.037942	-0.166396	2010-07-26
-0.0300829	-0.091847	-0.0423846	1.4143	-0.0630021	2010-07-27
-0.0636511	-0.0469892	-0.123158	-1.52911	-0.184712	2010-07-28
-0.00301827	0.033893	-0.0346042	-0.00170115	0.0487291	2010-07-29
-0.127518	-0.0636199	-0.250329	-0.133174	-0.145451	2010-07-30
0.0498808	0.0860985	0.237801	0.0724908	0.130759	2010-07-31
0.15981	0.16875	0.285075	0.138727	0.206799	2010-08-01
0.0534499	-0.00829922	0.0399703	0.094221	0.0767478	2010-08-02
-0.119133	-0.100283	-0.190186	-0.0515522	-0.112598	2010-08-03
0.153178	0.0894127	0.209204	0.172591	0.18757	2010-08-04
0.138729	-0.155799	0.130547	0.14486	0.123273	2010-08-05
0.0634359	0.0463024	-0.181661	2.53374	-0.0547621	2010-08-06
-0.120407	-0.0461782	0.00255971	0.528407	-0.0707217	2010-08-07
-0.130896	-0.0883864	-0.0135686	-3.29843	-0.0980712	2010-08-08
2.26969	0.120888	-0.0252669	0.0127989	0.0311424	2010-08-09
-2.26033	-0.0615687	-0.0241124	-0.0166878	0.00723985	2010-08-10
0.0123575	0.0132404	0.106258	-0.0419981	-0.0195834	2010-08-11
-0.118326	-0.0925059	-0.175135	-0.101377	-0.134251	2010-08-12
-0.132653	-0.131366	-0.327973	-0.236079	-0.216145	2010-08-13
-0.0612018	0.140567	-0.0592812	-0.0311029	-0.0561655	2010-08-14
0.138711	0.152454	0.313515	0.215343	0.250889	2010-08-15
0.104812	0.0480027	0.0810211	0.0720104	0.0951414	2010-08-16
-0.0665667	-0.0612949	-0.1794	-0.117941	-0.0541436	2010-08-17
-0.1016	-0.0524006	-0.123546	-0.0894418	-0.199994	2010-08-18
0.0236318	0.0218676	0.079544	0.057505	0.0405501	2010-08-19
0.0407045	0.129942	0.0219155	-0.0742832	-0.0243514	2010-08-20
-0.00916871	-0.0116481	-0.0855933	-0.0181562	-0.0831514	2010-08-21
0.11478	0.138007	0.178421	0.164054	0.222957	2010-08-22
-0.0851165	-0.0716595	-0.110203	-0.0678125	-0.0788585	2010-08-23
0.0452602	0.0258725	0.0940122	0.101878	0.132282	2010-08-24
0.0332295	0.0248822	-0.000433137	0.0272843	0.0212073	2010-08-25
-0.0486599	-0.0581229	0.0257674	-0.103454	-0.0819832	2010-08-26
0.0741985	0.0437837	0.133667	0.0742059	0.061163	2010-08-27
-0.0710425	-0.0424568	-0.142962	-0.119517	-0.134584	2010-08-28
-0.0239718	0.0218845	-0.0481176	-0.00619585	0.000421513	2010-08-29
-0.0241274	-0.0350113	-0.217278	-0.120307	-0.117762	2010-08-30
-0.0137173	-0.0304061	1.74117	0.130651	0.145164	2010-08-31
-0.0132457	-0.0362715	-1.57923	-0.0102537	-0.0648508	2010-09-01
-0.016713	-0.16207	-0.0697412	-0.164801	-0.0791083	2010-09-02
-0.00495927	0.0214091	-0.055914	-0.00698742	-0.0513962	2010-09-03
-0.0963129	0.0603118	0.0481199	-0.034036	-0.0906388	2010-09-04
0.15852	0.0962485	0.239704	0.246304	0.305618	2010-09-05
0.0459264	0.00779601	-0.011441	0.0439884	0.0494289	2010-09-06
-0.0722123	-0.07845	-0.299432	-0.116804	-0.129916	2010-09-07
0.0031937	0.044255	0.0370466	-0.0223118	-0.0153034	2010-09-08
-0.0223342	-0.0641104	-0.0100968	-0.0243226	-0.0230314	2010-09-09
-0.0100839	-0.0541602	0.195104	0.0153298	0.000308164	2010-09-10
-0.0435149	-0.0271373	-0.165139	-0.0835219	-0.0748343	2010-09-11
0.0630698	0.100401	0.172614	0.146012	0.156036	2010-09-12
0.0163425	0.0107566	-0.0530535	0.637522	0.00378132	2010-09-13
-0.0886144	-0.130954	-0.209704	-0.601234	-0.12068	2010-09-14
0.048594	-0.0157713	0.129011	-0.09084	0.0356282	2010-09-15
0.0131652	0.131073	0.122496	-0.00154127	-0.0202339	2010-09-16
0.0101451	0.00378352	-0.110034	-0.0622113	-0.0314114	2010-09-17
-0.0463153	-0.0255121	-0.0729113	-0.0173	-0.152651	2010-09-18
0.028252	0.0511131	0.0557118	-0.00921161	0.152629	2010-09-19
0.0310494	0.0603278	0.07942	0.0791107	0.103554	2010-09-20
-0.0295552	-0.0756815	-0.0193765	-0.0299292	-0.0229275	2010-09-21
0.00942337	0.00108407	-0.0127135	0.0352289	-0.0195024	2010-09-22
0.011932	0.0266446	-0.0574485	-0.0952675	-0.0289319	2010-09-23
-0.0102918	-0.0532802	-0.14943	-0.14671	-0.122161	2010-09-24
-0.0823975	-0.0253497	-0.0314902	-0.0835516	-0.109885	2010-09-25
0.0468071	0.0549949	-0.102782	0.0836453	0.0983779	2010-09-26
0.0810432	0.0585179	0.177751	0.0799146	0.0984725	2010-09-27
0.149196	0.112102	0.264291	0.186457	0.193429	2010-09-28
-0.0739559	-0.17312	-0.0203987	-0.0077836	-0.0370259	2010-09-29
-0.109449	-0.0342681	-0.196315	-0.123597	-0.168016	2010-09-30
-0.0615234	-0.0148202	-0.195288	-0.112494	-0.128301	2010-10-01
-0.0875898	-0.0614743	-0.499604	-0.169714	-0.207663	2010-10-02
0.0541529	0.069219	0.444165	0.294959	0.272129	2010-10-03
0.0508293	0.00843421	0.324305	-0.0151103	0.0569219	2010-10-04
-0.00554549	-0.020445	-0.116644	-0.0141466	-0.00748017	2010-10-05
0.0045438	0.0418815	0.115886	0.0128289	0.00779032	2010-10-06
0.0206627	-0.0178412	0.116016	0.0329253	0.0563087	2010-10-07
-0.00970541	0.015732	-0.117273	0.0146698	-0.0269288	2010-10-08
-0.0796458	-0.0260831	-0.116374	-0.102631	-0.100637	2010-10-09
0.07903	0.101614	0.0667619	0.0256771	0.0491892	2010-10-10
-0.0117729	-0.0430353	-0.149592	-0.398661	-0.0298434	2010-10-11
0.00572885	-0.0201923	2.416	0.457935	0.0713906	2010-10-12
-0.010787	0.00680729	-2.25958	-0.083123	-0.0950141	2010-10-13
-0.029567	-0.0385301	-0.238714	-0.0759737	-0.0559977	2010-10-14
-0.0695983	-0.118336	0.094942	0.0996566	0.00129405	2010-10-15
0.0111078	0.731658	0.164833	0.00580104	0.00517909	2010-10-16
0.123461	-0.601821	0.111126	0.1326	0.204285	2010-10-17
0.0860399	-0.160736	0.0247465	0.0314328	-0.00181839	2010-10-18
-0.100475	0.0670159	-0.180133	-0.145433	-0.210784	2010-10-19
0.0174782	0.0436604	0.0572158	0.129672	0.110643	2010-10-20
-0.0167031	0.0634537	0.0782039	0.276411	1.64225	2010-10-21
0.0038561	-0.0946557	0.0710417	-0.281205	-1.67362	2010-10-22
0.00566036	-0.0146289	0.0668523	-0.00623237	-0.082418	2010-10-23
0.0272501	0.0800616	-0.0596677	0.0659234	0.197716	2010-10-24
-0.0849712	-0.0290804	-0.204877	-0.113683	-0.119262	2010-10-25
-0.065442	-0.0349809	0.0224347	-0.0312497	-0.0210966	2010-10-26
-0.0316293	-0.0553547	-0.193943	0.0183281	-0.0701954	2010-10-27
-0.0219888	-0.0325308	0.231569	-0.0650319	-0.0148671	2010-10-28
0.0134948	-0.0319655	-0.375201	-0.0368394	0.0067849	2010-10-29
-0.115865	-0.0524049	0.100774	-0.19891	-0.103866	2010-10-30
0.134037	0.052113	0.29318	0.175709	-0.0189947	2010-10-31
0.119923	0.201784	0.0404479	0.000755386	0.0395541	2010-11-01
-0.0126853	-0.110466	0.112124	0.109738	0.149201	2010-11-02
-0.0140994	0.0319865	-0.288157	0.0156133	-0.0312341	2010-11-03
0.0414246	0.121096	0.0464031	0.00368066	0.0860302	2010-11-04
-0.0103513	-0.0377709	-0.171061	-0.0768072	-0.0836576	2010-11-05
-0.0651264	-0.0508509	0.0774323	0.041494	0.00778092	2010-11-06
0.0597726	0.0733412	0.318245	0.0455532	0.0867965	2010-11-07
0.0371417	0.00583965	0.0798536	0.0685909	0.0164486	2010-11-08
-0.0154773	-0.0251208	-0.117533	-0.0114546	-0.0384851	2010-11-09
0.0115872	0.00927965	0.0467855	-0.162777	-0.0469816	2010-11-10
-0.0180459	0.0108725	-0.167324	0.11237	0.0640476	2010-11-11
-0.0212588	-0.0622504	-0.0379338	-0.117508	-0.150308	2010-11-12
-0.0073212	0.0415987	-0.0767397	-0.139939	-0.055358	2010-11-13
0.0196959	-0.0459175	0.106314	0.18555	0.14679	2010-11-14
-0.00605575	-0.0133046	-0.0113709	0.102173	-0.0509272	2010-11-15
-0.046432	-0.0805068	0.0559916	0.100214	-0.0257497	2010-11-16
0.00089961	-0.00509956	-0.0876957	-0.0862609	0.0671732	2010-11-17
-0.00699833	0.00225912	-0.00479633	2.59122	0.0332632	2010-11-18
0.0181392	-0.154029	0.10576	-2.74831	-0.196394	2010-11-19
-0.142741	0.108785	-0.0779774	-0.0337265	-0.12005	2010-11-20
0.177774	0.106378	1.57126	0.196369	0.263201	2010-11-21
0.0342232	0.072096	-1.30697	0.050186	0.133267	2010-11-22
0.00939179	-0.0852887	-0.169858	-0.07271	0.039522	2010-11-23
0.0320657	0.0863569	0.0384642	-0.0642654	0.0290353	2010-11-24
0.0538306	0.00137	0.0229829	0.0887636	0.0538868	2010-11-25
-0.0788048	-0.151913	-0.386487	-0.290109	-0.353985	2010-11-26
-0.178401	0.0230929	-0.292427	0.0128901	0.179714	2010-11-27
0.105582	0.0635533	0.234547	0.02741	-0.218825	2010-11-28
0.0132978	0.0167537	-0.0224165	0.0326613	0.072159	2010-11-29
0.0284102	0.0376799	0.309291	0.172412	0.203354	2010-11-30
0.0237203	0.0385482	0.0922058	-0.0168405	-0.0409258	2010-12-01
-0.0310584	-0.0387958	0.0879948	-0.0352563	0.0157017	2010-12-02
0.0024008	0.0303256	-0.0352472	-0.115881	0.00357823	2010-12-03
-0.0874362	-0.08786	-0.286758	0.0258878	-0.169196	2010-12-04
0.109896	0.145606	0.173461	0.0864017	0.189188	2010-12-05
-0.00874995	-0.0603033	-0.128055	-0.085722	-0.111503	2010-12-06
-0.0557609	-0.0461284	-0.0730102	0.00598652	-0.0493585	2010-12-07
0.0894063	0.0350227	0.0179674	0.0283058	0.0162817	2010-12-08
-0.0722482	0.0188298	-0.274985	-0.0893489	-0.119053	2010-12-09
-0.00425332	-0.0387281	-0.222739	-0.42205	-0.225566	2010-12-10
-0.138186	-0.108896	0.37949	0.321227	0.217864	2010-12-11
0.181966	1.30333	0.23043	0.233449	0.181345	2010-12-12
0.0110691	-1.08104	-0.00205775	0.0551807	0.0979288	2010-12-13
0.00641644	0.0113778	-0.147466	-0.115078	-0.101376	2010-12-14
-0.0193466	0.0134955	0.0913656	0.0662858	-0.0288704	2010-12-15
-0.0105328	0.0623452	-0.132275	-0.0982833	-0.057417	2010-12-16
-0.100356	-0.145294	-0.247918	-0.216936	-0.237924	2010-12-17
-0.131305	-0.173502	-0.137661	-0.0553212	-0.0466612	2010-12-18
0.0616214	0.0411056	0.334942	0.12652	0.178004	2010-12-19
0.0578593	-0.0217137	0.223974	0.159081	0.0807866	2010-12-20
0.0461144	0.019628	-0.0652276	0.0476736	-0.00215424	2010-12-21
-0.0632244	-0.0397573	-0.297991	-0.282769	-0.225257	2010-12-22
-0.00996678	-0.0326142	0.419685	0.123757	0.0755564	2010-12-23
-0.125474	-0.218015	-0.447508	0.121686	-0.106242	2010-12-24
0.0386454	0.126222	-0.313894	-0.345059	-0.291251	2010-12-25
0.0340981	0.118177	0.0519659	0.0392406	0.0695001	2010-12-26
0.0809888	0.0520375	0.518079	0.145464	0.373258	2010-12-27
0.0821955	0.0773244	0.0899363	0.0828131	0.0499776	2010-12-28
0.0801048	0.121524	0.325129	0.0427111	0.0446799	2010-12-29
0.119842	0.0769573	-0.07276	0.161815	0.307395	2010-12-30
-0.114394	-0.112496	-0.297218	-0.0213803	-0.273414	2010-12-31
-0.025381	0.056016	-0.0156758	0.157731	0.111975	2011-01-01
-0.0430464	-0.00143681	-0.0418622	-0.0266617	-0.0527396	2011-01-02
0.148159	0.139293	0.331776	0.138491	0.267759	2011-01-03
-0.055969	-0.0793727	-0.00992903	-0.0559623	-0.0164958	2011-01-04
0.134344	0.124173	0.260721	0.134834	0.181121	2011-01-05
0.0659052	0.0659287	0.133723	0.00061624	0.105464	2011-01-06
-0.0540001	-0.0827999	-0.211115	0.0032094	-0.102633	2011-01-07
-0.0611804	-0.00136984	-0.343299	-0.120748	-0.210967	2011-01-08
0.492864	0.617849	0.525658	0.0696702	0.408868	2011-01-09
-0.196392	-0.257455	-0.203926	-0.0276333	-0.182566	2011-01-10
-0.0771771	-0.0397363	0.00947232	0.0145632	0.0147669	2011-01-11
-0.0278086	-0.0916738	0.025186	0.0282801	0.0292968	2011-01-12
-0.0863507	-0.0722436	-0.0232982	-0.0504327	-0.0761483	2011-01-13
-0.0248121	-0.0666672	0.0136082	0.0268929	0.00290929	2011-01-14
-0.115485	-0.210099	-0.158888	-0.0727028	-0.138893	2011-01-15
0.0460583	1.47495	-0.0391863	-0.0838889	-0.11763	2011-01-16
-0.107794	0.846818	0.11655	0.0519807	0.0972981	2011-01-17
-0.0518758	-0.786574	-0.0814896	0.0271016	-0.0231844	2011-01-18
0.0705196	-1.32802	0.220259	0.060741	0.105488	2011-01-19
0.0459817	-0.106106	-0.189666	-0.0623085	-0.0133994	2011-01-20
0.00565526	-0.0351292	-0.0219461	0.0494257	-0.356209	2011-01-21
-0.0470399	-0.123901	0.146912	0.0671346	0.179153	2011-01-22
0.249324	0.763358	0.0250199	-0.0256366	0.194265	2011-01-23
0.562537	0.0599425	-0.0929988	-0.0106785	-0.0845846	2011-01-24
0.345861	0.190629	0.0578326	0.166475	0.0999373	2011-01-25
0.865655	-0.0716939	0.0866559	-0.0922193	0.120305	2011-01-26
-1.83689	-0.411252	-0.119717	-0.0676135	-0.116463	2011-01-27
-0.115762	-0.300119	-0.00633556	-0.0738678	-0.0182358	2011-01-28
0.27414	0.154398	0.965734	0.0309009	0.299955	2011-01-29
2.29947	0.975524	3.46981	0.47642	2.62824	2011-01-30
1.25586	2.1716	-3.98486	-0.0713487	-0.425366	2011-01-31
-0.0598374	0.273966	0.36174	-0.156425	-1.63455	2011-02-01
-1.4197	-2.0432	-0.303227	-0.00151624	-0.480681	2011-02-02
-0.497062	0.0561202	-0.169987	0.0230682	-0.0646012	2011-02-03
-0.181336	-0.429403	-0.0442439	-0.215773	0.0204459	2011-02-04
-1.3598	-0.80228	-0.602877	-0.171233	-0.57373	2011-02-05
-0.196342	-0.273283	0.301307	0.21821	0.286796	2011-02-06
-0.0784678	-0.111132	-0.102068	0.0158967	-0.0821382	2011-02-07
-0.0125232	-0.00141795	0.102687	0.0535885	0.0431936	2011-02-08
0.0960164	0.0615624	0.225974	0.0189301	0.15107	2011-02-09
-0.0161318	-0.0130014	-0.194323	-0.064867	-0.0958378	2011-02-10
-0.287521	-0.278633	-0.331401	-0.100195	-0.314482	2011-02-11
-0.0428462	-0.0176594	-0.0717771	-0.0189587	-0.0518546	2011-02-12
0.14053	0.2034	0.275898	0.0776817	0.247002	2011-02-13
0.0806479	-0.0138541	0.19161	-0.013275	0.150026	2011-02-14
0.0593654	0.0332196	0.0726538	0.0663134	0.0350094	2011-02-15
0.229293	0.148039	0.0789458	0.0556275	0.151065	2011-02-16
0.0259817	0.0870894	-0.159768	0.0152714	-0.0428669	2011-02-17
0.243366	0.211702	-0.0553902	0.035213	-0.0338759	2011-02-18
0.0674687	0.094644	-0.0739587	-0.10789	-0.0447869	2011-02-19
-0.39214	-0.0957247	0.0183764	0.034254	-0.0628301	2011-02-20
-0.281557	-0.524799	-0.106266	-0.0682655	-0.139524	2011-02-21
-0.0112692	-0.0654709	0.0606752	-0.0820918	0.00582194	2011-02-22
0.083246	0.0666372	0.11742	0.00750775	0.0562172	2011-02-23
-0.0216985	-0.017865	0.021475	0.0528186	0.00624461	2011-02-24
0.0646303	-0.000548043	-0.000918757	0.123012	0.0284161	2011-02-25
-0.156092	-0.0418795	-0.0259839	-0.146369	-0.118438	2011-02-26
0.22231	0.235985	0.0296117	0.077515	0.145465	2011-02-27
-0.0767671	0.0408338	-0.285636	-0.0589766	-0.134606	2011-02-28
-0.141828	-0.151885	0.012166	-0.025411	-0.0927222	2011-03-01
0.0708147	0.229879	0.0572096	-0.0113283	0.0383429	2011-03-02
0.0954312	-0.202366	0.0646717	0.0319805	0.107637	2011-03-03
-0.207732	-0.091455	-0.270653	-0.0492155	-0.229253	2011-03-04
-0.0839125	-0.258235	-0.165152	-0.0359703	-0.235685	2011-03-05
0.139998	0.120176	0.451271	-0.0497762	0.332123	2011-03-06
0.0762981	0.0796017	0.079676	0.108058	0.126444	2011-03-07
-0.0243572	-0.0813908	-0.0839613	0.0365905	-0.0340736	2011-03-08
0.0235517	-0.0117179	-0.0392783	-0.0318104	-0.0131683	2011-03-09
0.0302751	0.17368	0.141127	0.0106952	0.0687061	2011-03-10
-0.0635001	-0.0821817	0.0461826	0.0160327	-0.00831827	2011-03-11
0.0107648	0.0286575	-0.0979147	0.00338081	-0.00229824	2011-03-12
-0.0581827	-0.0419888	-0.189972	-0.0617159	-0.155872	2011-03-13
0.0440546	-0.00477197	0.335419	0.0732244	0.167196	2011-03-14
0.0202969	0.0769203	-0.12027	-0.0107887	0.00155161	2011-03-15
-0.0113546	0.0319938	-0.0179673	0.00377755	-0.00245166	2011-03-16
-0.0775127	-0.060357	-0.104064	-0.0654519	-0.0836062	2011-03-17
-0.0372388	-0.0337867	-0.107249	-0.0434043	-0.101483	2011-03-18
-0.0418158	0.819795	0.0380802	-0.028786	-0.0245494	2011-03-19
0.162336	-0.518936	0.124641	0.0686426	0.161851	2011-03-20
0.113314	0.27023	-0.321975	0.0357112	0.0420686	2011-03-21
-0.0648612	-0.256912	-0.0436778	-0.0518289	-0.0398372	2011-03-22
-0.126144	-0.0957438	0.0293293	-0.146572	-0.053719	2011-03-23
0.0119179	0.0836688	0.291979	0.051714	0.00562879	2011-03-24
-0.0619055	-0.383817	-0.0894443	-0.0894201	-0.0684849	2011-03-25
-0.00855589	0.00602095	0.0253259	-0.0152533	-0.00152575	2011-03-26
0.0991738	0.130557	0.216847	0.215233	0.181011	2011-03-27
-0.0283588	-0.0894392	0.0218852	0.0505655	0.0171689	2011-03-28
0.0179569	0.0423804	0.0308754	0.0116188	-0.0352395	2011-03-29
-0.0627873	-0.118262	-0.113861	-0.0174201	-0.069007	2011-03-30
0.0278147	0.122152	-0.0118446	-0.0507997	0.00862818	2011-03-31
0.0387364	-0.0536396	-0.0974216	-0.0525619	-0.0646568	2011-04-01
-0.0668758	-0.0608847	-0.101148	-0.0332451	-0.10339	2011-04-02
0.0946101	0.118946	0.156745	0.114985	0.119402	2011-04-03
0.0279375	0.0576611	0.0681804	0.0651076	0.0672862	2011-04-04
-0.0114645	-0.0556717	0.0297851	-0.00921512	0.00447394	2011-04-05
-0.00362352	-0.0126467	0.00214858	-0.0245164	0.01082	2011-04-06
-0.00707383	0.0551566	-0.0944677	-0.0309542	-0.0179421	2011-04-07
0.047087	0.0412144	0.0702656	-0.0152958	0.0360295	2011-04-08
-0.128044	-0.148694	-0.196209	-0.086868	-0.181791	2011-04-09
0.127112	0.139977	0.33357	0.153025	0.202613	2011-04-10
-0.062635	-0.0773502	-0.0256001	-0.0132671	0.0122136	2011-04-11
0.0194339	-0.0602266	0.0125427	0.0107454	-0.0118187	2011-04-12
0.0276241	0.0868715	-0.0810408	-0.0109187	0.0135505	2011-04-13
0.061937	0.129271	-0.0163578	0.00389938	0.00960928	2011-04-14
0.0456378	0.0439573	-0.0231194	-0.000370717	-0.0170933	2011-04-15
-0.117408	-0.110764	0.002694	-0.058125	-0.080923	2011-04-16
-0.0301983	0.0173729	0.113055	0.016819	0.0793775	2011-04-17
0.0709972	0.0397205	0.0680483	0.0540759	0.0915149	2011-04-18
-0.0926308	-0.122937	-0.107637	0.00637009	-0.0752866	2011-04-19
-0.0199646	-0.0067918	-0.056611	-0.0574091	-0.0503845	2011-04-20
-0.0729971	-0.113042	-0.196536	-0.0545305	-0.164198	2011-04-21
0.0182406	-0.0344075	0.0874379	0.0050944	-0.00791943	2011-04-22
-0.00512041	0.0190696	-0.0597529	0.0499007	0.0184527	2011-04-23
0.0433899	0.0470307	0.0303659	0.0263366	0.0525622	2011-04-24
-0.000258091	0.00343377	-0.0523526	0.278018	-0.00508723	2011-04-25
-0.0183021	-0.0184669	0.0607153	-0.309064	0.041443	2011-04-26
-0.00984334	-0.0468655	-0.0371756	0.00328427	-0.0320657	2011-04-27
0.0260937	0.105992	0.0349358	-0.00584232	0.0185263	2011-04-28
0.0663964	0.0818923	0.078621	-0.0301927	0.0457552	2011-04-29
-0.0444376	-0.0786881	-0.000291756	0.0360461	-0.00229562	2011-04-30
0.0814186	-0.0041207	0.0946131	0.0329712	0.110112	2011-05-01
0.0506655	0.166458	0.106844	0.139013	0.126057	2011-05-02
-0.0137531	-0.0322982	-0.0325566	-0.0699241	-0.0424288	2011-05-03
0.0934069	0.0815754	0.0728596	0.171202	0.0851571	2011-05-04
-0.046625	-0.0451911	0.00111189	0.03326	0.00447044	2011-05-05
-0.0945876	-0.0708682	-0.122206	-0.12582	-0.119553	2011-05-06
-0.0684139	-0.116483	-0.0854723	0.00306919	-0.115038	2011-05-07
0.178112	0.150235	0.192755	0.265321	0.240183	2011-05-08
-0.145655	-0.134518	-0.0682243	-0.00833882	0.049033	2011-05-09
0.0602457	0.0319402	-0.227044	0.67364	-0.120454	2011-05-10
-0.0314182	0.027898	0.0395281	-0.540442	0.0414048	2011-05-11
0.00420707	-0.0107523	0.0485822	-0.365057	-0.109667	2011-05-12
0.0441371	-0.027434	0.0765544	0.0046218	0.0458704	2011-05-13
0.0204384	0.0719955	0.0720606	-0.0208101	-0.000257648	2011-05-14
0.112089	0.0161849	0.134691	0.1865	0.174503	2011-05-15
-0.0377524	0.0625212	-0.11667	-0.125775	-0.0674643	2011-05-16
-0.132858	-0.101357	-0.0931693	-0.0632742	0.000776986	2011-05-17
0.0769687	0.127838	-0.0194959	0.129081	-0.0774107	2011-05-18
0.00954798	0.214372	0.166034	-0.0236597	0.0846536	2011-05-19
-0.105467	-0.199472	-0.254633	-0.0974117	-0.25416	2011-05-20
-0.0616525	-0.114682	-0.112496	0.104165	-0.13022	2011-05-21
0.0313839	0.0184106	0.14808	-0.156083	0.139706	2011-05-22
0.0356339	0.00480064	0.189069	0.0778459	0.113855	2011-05-23
0.158066	0.0441202	0.132365	0.422783	0.132849	2011-05-24
-0.00825991	-0.00463467	0.0733014	-0.110904	0.0709075	2011-05-25
0.102617	0.151639	0.105558	0.013075	0.112548	2011-05-26
-0.0118662	-0.0965689	-0.0461722	0.442263	-0.0489312	2011-05-27
-0.123344	-0.126441	-0.159737	-0.633224	-0.183972	2011-05-28
0.0532063	0.10358	0.863238	0.128662	0.946752	2011-05-29
-0.0942232	-0.0865476	-0.666119	0.0377661	-0.717384	2011-05-30
-0.0935657	-0.13016	-0.178696	-0.223336	-0.214039	2011-05-31
-0.0392607	-0.00396026	-0.174253	-0.119892	-0.130843	2011-06-01
0.000387199	-0.0127457	0.0949231	-0.02297	-0.0434218	2011-06-02
-0.0416156	-0.0551359	-0.179347	0.0375321	-0.0714876	2011-06-03
0.0027953	-0.0228252	-0.10263	-0.069518	-0.0303033	2011-06-04
0.0807671	0.116341	0.420296	0.0733869	0.243837	2011-06-05
0.0523484	0.00301969	-0.115974	-0.076594	-0.0687326	2011-06-06
0.179174	0.122439	0.203208	0.166867	0.243109	2011-06-07
-0.0818445	0.0393765	-0.193741	-0.105464	-0.214104	2011-06-08
-0.0560991	0.0622557	-0.103773	-0.119334	-0.0629712	2011-06-09
-0.0501901	-0.0782271	-0.0937088	-0.0764148	-0.0862167	2011-06-10
-0.102107	-0.155307	-0.0896513	-0.0804398	-0.100577	2011-06-11
0.0435211	0.00623644	0.231251	0.100708	0.085051	2011-06-12
0.146309	0.109431	0.145423	0.242581	0.140383	2011-06-13
-0.0414203	-0.0156233	0.0127267	0.045463	0.0799849	2011-06-14
0.0274136	0.0370275	-0.214877	-0.0767815	-0.00630472	2011-06-15
-0.093072	-0.054928	-0.0862685	-0.147498	-0.1255	2011-06-16
0.00985905	0.0455546	0.165314	0.0466979	-0.0214964	2011-06-17
-0.0879201	-0.0546308	-0.442	0.152744	-0.236288	2011-06-18
0.0383255	0.0164764	0.161783	-0.305818	0.15276	2011-06-19
0.0206519	-0.010689	0.0347907	0.0275129	-0.0285304	2011-06-20
0.0822311	0.0807605	0.0576623	0.0763195	0.0657248	2011-06-21
-0.0407622	-0.0412801	0.134799	-0.053364	-0.0250537	2011-06-22
[truncated: 1,777 more rows]

## Sheet: realized variance
NSW	QLD	SA	TAS	VIC	Date
4.25898	1.3944	19.947	0.212915	9.29726	2006-01-01
0.430283	0.432059	0.758736	0.0875285	0.509139	2006-01-02
10.1165	39.2436	4.3094	0.141812	6.6347	2006-01-03
0.216595	0.227835	1.11417	5.3482	0.720253	2006-01-04
0.179144	0.176109	0.486442	119.869	0.398422	2006-01-05
0.342094	0.325141	0.533261	0.188065	0.361046	2006-01-06
0.229075	0.331655	0.417179	0.32891	0.250381	2006-01-07
0.312142	0.299446	21.112	0.0805169	0.33099	2006-01-08
0.814122	0.81829	13.0313	5.65077	0.807948	2006-01-09
5.5468	9.32375	5.83205	245.649	5.53161	2006-01-10
4.7855	2.94005	2.98981	1.43954	3.38161	2006-01-11
1.53952	69.0309	1.48729	0.102042	1.55936	2006-01-12
0.764313	0.691077	0.79183	0.173068	0.781615	2006-01-13
0.418773	0.549836	0.463399	1.54212	0.459874	2006-01-14
0.222588	0.204617	0.531223	65.72	0.247853	2006-01-15
0.346296	0.448267	49.1843	10.8465	0.371809	2006-01-16
0.345939	0.311073	10.6612	0.480943	0.382364	2006-01-17
0.286737	0.249364	1.10282	0.127893	0.329081	2006-01-18
4.08465	3.85291	58.9495	0.345901	41.5142	2006-01-19
8.05748	7.71206	50.0134	0.314194	41.4397	2006-01-20
5.82408	10.8051	40.3307	0.438072	19.5942	2006-01-21
5.67594	5.52831	12.5208	121.883	8.90284	2006-01-22
11.5048	22.2401	53.2718	0.149287	54.2316	2006-01-23
0.470675	22.8696	0.418486	0.21859	0.457469	2006-01-24
0.594124	0.580823	9.52654	2.06988	9.21308	2006-01-25
14.0115	10.7005	74.2546	0.264081	75.7427	2006-01-26
2.68037	2.62196	2.8675	0.629616	2.84366	2006-01-27
0.331091	0.327225	0.843364	0.180412	0.342779	2006-01-28
0.433214	0.568277	0.518396	0.203105	0.449195	2006-01-29
2.64288	2.67952	1.06656	0.213064	1.17991	2006-01-30
0.611656	0.561911	0.699364	0.181016	0.629341	2006-01-31
5.88131	5.00664	4.8362	0.120411	5.06803	2006-02-01
99.358	248.678	25.2615	0.0990888	26.6717	2006-02-02
0.670536	0.603572	0.702925	1.99923	0.69007	2006-02-03
0.191153	0.167391	0.263273	0.0599443	0.259743	2006-02-04
0.232137	0.207196	0.597982	0.127293	0.272122	2006-02-05
2.1284	2.26866	3.14159	0.111436	3.20082	2006-02-06
0.114481	0.118277	0.178262	29.8571	0.143886	2006-02-07
0.294989	0.285481	0.604897	0.249435	0.429474	2006-02-08
0.442941	0.387656	0.604185	0.0484797	0.521593	2006-02-09
0.14707	0.206922	0.359596	0.278145	0.169596	2006-02-10
0.33613	0.323836	0.522654	0.0905745	0.368242	2006-02-11
0.312359	0.325432	0.337638	0.106731	0.328163	2006-02-12
0.417893	10.5262	0.887563	0.110183	0.451324	2006-02-13
0.402381	0.330992	0.763061	1.17202	0.474421	2006-02-14
0.443884	0.342347	0.645271	4.19756	0.497687	2006-02-15
1.15505	1.06566	17.4508	6.3161	3.03349	2006-02-16
1.69531	1.56634	1.5595	0.138999	1.70853	2006-02-17
0.734057	0.757319	1.1682	0.121584	0.739254	2006-02-18
0.946068	74.5688	2.46082	0.119741	2.90599	2006-02-19
4.32417	13.953	4.23568	0.143766	4.43014	2006-02-20
1.75808	1.70202	1.7438	20.5538	1.76043	2006-02-21
2.63303	2.53599	2.38705	11.6282	2.39072	2006-02-22
4.9298	4.75545	136.808	1.17738	205.368	2006-02-23
3.6796	3.48801	34.6972	0.0255432	117.005	2006-02-24
0.324982	0.186878	0.494618	0.385727	0.34582	2006-02-25
0.266741	0.290086	0.328891	0.117341	0.322676	2006-02-26
0.604738	0.520546	0.570328	0.138359	0.611975	2006-02-27
2.07791	2.10712	2.02063	0.080535	2.08247	2006-02-28
0.441006	0.335719	0.598279	1.20923	0.494081	2006-03-01
1.6382	1.57417	4.96181	7.54647	1.69393	2006-03-02
2.26976	3.1825	9.45073	22.5818	9.57221	2006-03-03
1.11217	1.09462	1.21751	1.45109	1.16186	2006-03-04
0.154862	0.189943	0.275863	0.608393	0.177853	2006-03-05
2.12978	2.14582	1.17965	3.97978	1.21675	2006-03-06
0.749687	0.749774	0.386377	0.448538	0.375516	2006-03-07
1.09203	23.9414	1.03347	2.71488	1.06862	2006-03-08
2.27329	2.34637	2.09454	2.35514	2.19656	2006-03-09
1.77979	1.83727	1.82802	3.67858	1.71542	2006-03-10
0.329346	0.338063	4.20979	0.472522	0.338516	2006-03-11
0.429513	1.07593	0.509077	0.520398	0.452114	2006-03-12
1.18062	1.09254	0.681523	0.500638	1.04014	2006-03-13
0.390876	0.521204	0.415653	0.554645	0.45155	2006-03-14
0.641994	0.665521	0.633923	0.288838	0.716134	2006-03-15
1.24251	1.76764	1.08737	0.760779	1.09472	2006-03-16
0.895985	0.777923	1.06456	0.855518	0.982442	2006-03-17
0.190825	0.27691	0.277062	0.792932	0.283206	2006-03-18
0.477031	0.4869	1.25479	0.826588	1.26335	2006-03-19
0.456901	0.469954	0.468338	0.564804	0.454112	2006-03-20
0.555251	0.735821	0.534267	0.441836	0.538544	2006-03-21
1.24958	1.73756	60.5962	1.08132	28.229	2006-03-22
1.44146	0.829764	1.4889	1.01667	1.31641	2006-03-23
0.558921	1.13564	1.49001	1.42519	0.615917	2006-03-24
0.856304	1.05184	18.4017	0.56129	0.916788	2006-03-25
0.365143	0.397234	2.57252	0.376075	0.482781	2006-03-26
0.401425	7.83327	0.627508	11.4128	0.440247	2006-03-27
0.868319	1.04728	0.653672	52.9394	0.846037	2006-03-28
1.97316	0.51995	2.47181	311.167	2.1557	2006-03-29
0.416245	1.10625	0.53074	0.535381	0.415329	2006-03-30
0.348461	0.441065	0.347745	0.506713	0.352812	2006-03-31
0.362549	0.326145	0.92997	0.496	0.537242	2006-04-01
0.390334	0.342081	0.765622	0.254946	0.460715	2006-04-02
1.30528	1.28586	41.5936	3.45722	1.318	2006-04-03
0.418141	56.3069	0.894514	5.99382	0.473276	2006-04-04
0.395929	17.6917	0.569245	5.30256	0.454541	2006-04-05
0.439443	0.574466	1.83469	1.21177	1.77356	2006-04-06
0.399983	0.588739	1.00199	0.175847	0.441953	2006-04-07
0.983844	0.671548	0.659635	0.248574	1.02221	2006-04-08
0.316418	0.344596	0.802182	85.0013	0.392094	2006-04-09
0.411313	0.332494	39.4992	0.345092	39.5745	2006-04-10
0.45348	1.38871	0.670662	0.40458	0.501889	2006-04-11
0.608879	0.424427	9.57075	0.381738	0.860539	2006-04-12
0.4443	0.547376	0.425468	0.188273	0.498214	2006-04-13
0.671771	0.227248	1.28334	0.180932	0.739262	2006-04-14
0.535048	0.36745	1.38582	0.0591731	0.61525	2006-04-15
0.406064	0.370472	1.03446	0.0676273	0.443771	2006-04-16
0.304677	0.266778	0.808173	0.243654	0.343367	2006-04-17
0.420544	0.413445	0.999577	0.0768725	0.506016	2006-04-18
0.437504	0.422889	0.798292	5.23025	0.532383	2006-04-19
3.65841	3.69612	3.82217	0.167803	3.86281	2006-04-20
2.42202	2.4493	2.42882	0.101753	2.38413	2006-04-21
3.99811	3.9114	3.71498	0.174443	4.00494	2006-04-22
1.57943	1.57299	1.69667	0.0665578	1.65311	2006-04-23
1.36808	1.33045	1.47723	0.733928	1.42434	2006-04-24
0.674877	0.494041	0.922987	1.31615	1.13651	2006-04-25
2.34663	2.00058	2.30212	2.36364	2.24873	2006-04-26
1.54258	1.2985	1.58506	2.23874	1.59589	2006-04-27
1.85174	1.6992	1.80045	0.355732	2.67587	2006-04-28
0.941578	0.684566	0.994788	3.64256	1.07937	2006-04-29
0.75149	0.671725	0.921931	1.41342	0.845819	2006-04-30
0.599213	0.51028	0.560413	1.71942	0.687461	2006-05-01
0.696105	0.396094	1.29147	6.84712	1.28165	2006-05-02
0.935515	0.479112	1.05546	2.21485	0.964225	2006-05-03
0.707163	0.51421	0.585162	2.00289	0.758156	2006-05-04
0.794965	0.714195	0.83742	7.78368	0.791373	2006-05-05
0.466826	0.429962	0.682876	1.82004	0.50803	2006-05-06
1.65724	1.57733	3.42265	2.15117	2.69169	2006-05-07
3.16563	3.07098	125.936	4.81979	5.82998	2006-05-08
2.99923	2.88521	4.87848	3.06551	3.05563	2006-05-09
1.5575	1.55746	9.21776	1.71116	1.5119	2006-05-10
1.60936	1.63311	2.28779	13.1625	1.86754	2006-05-11
0.572255	0.467557	1.29249	6.7633	0.679236	2006-05-12
0.271356	0.205098	0.86865	23.5364	0.316278	2006-05-13
0.4209	0.374579	1.07328	10.9434	0.875006	2006-05-14
1.50853	1.51319	2.18123	1.3303	1.48129	2006-05-15
2.28888	2.22284	2.68294	1.78631	2.8156	2006-05-16
0.555977	0.430448	1.24084	0.34539	0.89444	2006-05-17
0.526651	2.67656	0.883102	84.8849	0.792656	2006-05-18
0.53953	0.470793	0.433756	1.90221	1.04821	2006-05-19
1.4004	1.31226	1.33286	7.86321	1.40902	2006-05-20
1.02439	0.987706	1.07991	6.16498	1.0435	2006-05-21
3.89284	3.53281	3.45516	18.4628	3.43935	2006-05-22
3.21803	3.23928	81.7923	83.3516	81.8295	2006-05-23
1.56517	1.54996	28.1703	6.75404	3.01786	2006-05-24
1.29729	1.313	1.67633	2.997	2.63642	2006-05-25
1.78412	1.77545	1.8121	13.3591	2.71452	2006-05-26
1.42986	1.39331	1.43183	2.22111	1.5248	2006-05-27
2.87965	2.86877	3.25457	3.93185	2.93694	2006-05-28
15.7809	15.9831	15.3133	26.8409	15.0887	2006-05-29
5.38637	5.54585	5.60912	7.62588	5.68377	2006-05-30
2.45016	2.42039	2.78359	10.7162	2.76762	2006-05-31
2.39014	2.47764	3.36198	11.1234	3.71034	2006-06-01
0.987458	1.02576	0.893868	10.2599	0.987256	2006-06-02
1.00769	0.974323	1.01331	19.9744	1.02997	2006-06-03
0.924045	0.927612	1.11346	5.92654	0.95874	2006-06-04
2.47954	2.96434	2.04811	54.0131	2.23646	2006-06-05
1.34201	1.71469	1.16246	13.5386	1.3218	2006-06-06
1.52187	1.55928	1.77597	4.68226	1.54154	2006-06-07
0.91226	0.895055	0.851146	14.3886	0.964799	2006-06-08
0.576609	0.58125	0.547458	90.1669	0.695253	2006-06-09
1.28065	1.32137	1.8888	9.22453	2.01551	2006-06-10
0.809837	0.917392	1.07093	3.77573	1.16319	2006-06-11
1.53864	1.59492	1.36393	2.21712	1.40543	2006-06-12
1.26648	1.22734	1.90921	8.73498	1.74171	2006-06-13
2.9909	5.73454	3.65889	10.7958	3.68147	2006-06-14
1.72739	2.29003	1.49525	5.69205	1.61968	2006-06-15
7.99068	3.43633	1.74465	3.32427	1.89807	2006-06-16
1.88003	2.72093	1.7627	8.03456	2.24831	2006-06-17
1.31033	1.92012	1.70731	7.85283	1.91062	2006-06-18
1.62234	2.2656	2.41194	20.3368	2.88214	2006-06-19
1.7834	1.83885	1.611	55.3962	2.06999	2006-06-20
1.69939	1.61934	1.45214	12.17	1.56192	2006-06-21
1.54822	1.59053	1.68093	6.38792	1.80701	2006-06-22
1.30401	1.18982	1.13024	4.81242	1.21065	2006-06-23
1.08528	1.07203	1.11471	10.2623	1.21369	2006-06-24
0.926551	0.868199	0.965544	4.49812	1.28195	2006-06-25
1.68016	1.90582	1.5362	20.3651	1.63239	2006-06-26
2.23582	9.85127	1.78771	4.234	2.45187	2006-06-27
1.5977	1.35488	1.5833	16.0155	1.78278	2006-06-28
2.04181	2.238	1.85238	5.20122	2.10212	2006-06-29
1.99687	2.44113	1.7446	37.6831	1.95369	2006-06-30
3.0453	2.79978	2.93187	7.9569	3.31602	2006-07-01
1.67202	6.98298	2.40928	6.24137	6.91265	2006-07-02
8.78038	10.2616	12.9728	52.555	9.38948	2006-07-03
1.84981	2.9185	3.63038	8.62149	3.6877	2006-07-04
1.20043	1.89648	1.48538	4.68037	2.62618	2006-07-05
2.02879	2.32114	2.85646	5.7071	3.95967	2006-07-06
2.27044	4.73099	2.48466	3.598	7.00947	2006-07-07
2.12803	3.70187	2.56218	3.95919	18.2464	2006-07-08
2.7542	4.18955	2.82877	4.04408	5.57965	2006-07-09
3.81935	6.43897	3.75591	5.72481	4.91481	2006-07-10
5.00369	7.6943	4.76739	7.25064	5.07526	2006-07-11
4.56558	7.32266	4.80486	5.25448	4.57749	2006-07-12
3.91274	6.40695	3.49038	5.31536	3.72226	2006-07-13
3.81532	6.57863	3.69015	4.08934	3.79886	2006-07-14
1.76412	1.95705	1.83549	3.56552	1.78377	2006-07-15
1.04741	0.987279	1.16626	1.55504	1.29516	2006-07-16
1.3657	1.74483	1.86774	2.11874	1.87643	2006-07-17
1.86216	2.36185	1.69188	13.5994	1.70342	2006-07-18
20.1059	12.1395	21.6269	21.2767	20.175	2006-07-19
14.417	22.8654	10.5981	22.0374	13.6965	2006-07-20
1.21358	2.81638	1.44645	10.3936	1.56785	2006-07-21
1.67854	2.48054	1.59113	3.85984	1.67381	2006-07-22
3.24725	6.76885	3.18108	3.78593	3.2232	2006-07-23
5.17011	7.76519	15.4053	8.28193	5.32021	2006-07-24
1.41731	1.7794	1.43097	4.9317	1.62885	2006-07-25
1.53606	2.19901	1.50287	4.38094	1.60553	2006-07-26
0.984557	3.81113	1.07841	14.8777	1.2274	2006-07-27
1.08112	1.20877	1.24604	3.41372	1.24465	2006-07-28
0.960473	1.30854	4.74523	3.60568	1.13824	2006-07-29
0.864175	0.849853	18.4426	1.00024	0.870756	2006-07-30
3.04039	4.77776	5.4998	11.5062	3.19883	2006-07-31
1.41476	1.98056	2.9556	2.13663	4.11918	2006-08-01
4.37694	5.07699	4.65601	9.48135	5.48681	2006-08-02
1.22312	5.45234	1.38534	3.79801	1.15696	2006-08-03
4.49994	10.8017	5.35656	7.48446	5.23775	2006-08-04
1.32447	4.11778	10.9637	2.81272	2.45912	2006-08-05
1.23983	2.54131	5.26161	2.0335	5.42104	2006-08-06
3.74623	3.94248	3.83362	3.72314	3.80044	2006-08-07
1.51935	1.45907	1.7042	2.62834	1.77618	2006-08-08
0.896826	0.957386	1.01626	5.50275	0.86809	2006-08-09
1.42903	1.42612	8.75297	3.15538	1.41822	2006-08-10
0.671677	0.699372	0.830849	2.5953	0.967461	2006-08-11
0.751009	0.735722	0.742127	2.50478	1.09764	2006-08-12
0.745559	0.618809	0.783368	24.9691	0.773696	2006-08-13
1.01067	1.02898	0.956335	2.80011	1.0428	2006-08-14
1.03389	0.956786	0.923286	2.26556	1.01144	2006-08-15
1.1396	1.03908	1.09563	1.88714	1.74284	2006-08-16
1.11164	1.01316	1.35101	3.23052	1.21552	2006-08-17
0.749108	0.723297	55.9377	59.7472	0.919829	2006-08-18
1.14638	0.961267	1.20581	7.99665	1.13078	2006-08-19
0.577238	0.558278	0.622853	17.1078	0.637484	2006-08-20
1.2538	1.81424	1.42756	3.14755	1.4802	2006-08-21
1.27406	8.42724	1.32442	2.91647	1.31169	2006-08-22
1.15698	1.28324	1.34279	2.65651	1.31751	2006-08-23
4.1762	9.61781	4.11977	4.83792	4.03688	2006-08-24
1.68049	0.757338	1.74899	2.88253	1.66631	2006-08-25
1.29678	2.07267	2.12674	3.65224	1.77254	2006-08-26
0.796608	0.84402	0.886645	10.9888	0.878554	2006-08-27
1.93991	2.90452	2.05269	11.1894	1.97756	2006-08-28
1.94856	2.15321	1.85679	8.21141	1.93997	2006-08-29
1.11067	1.3356	1.05294	2.48528	1.0184	2006-08-30
1.32442	1.39561	1.20593	1.86183	1.28231	2006-08-31
0.950344	0.892684	0.934237	0.321192	0.963616	2006-09-01
0.795348	0.724083	0.951315	1.43074	0.931658	2006-09-02
0.99824	0.859629	1.10028	4.44183	1.09797	2006-09-03
0.546975	0.518157	0.544491	12.0759	0.58454	2006-09-04
1.13848	1.29528	1.40306	0.816892	1.29913	2006-09-05
1.60108	4.81038	5.62744	2.39033	1.61975	2006-09-06
3.24086	7.60956	3.22933	7.02592	3.24282	2006-09-07
1.3637	1.06394	1.36256	3.52341	1.38521	2006-09-08
3.92788	6.36025	3.92545	7.77555	3.92768	2006-09-09
1.17967	0.954767	1.24803	1.45393	1.21139	2006-09-10
5.93691	10.8697	10.554	5.12208	5.98322	2006-09-11
6.76684	3.30884	4.7298	9.07992	5.93765	2006-09-12
2.08558	1.62692	2.08882	4.03635	2.08273	2006-09-13
1.44763	1.36386	1.41065	12.6089	1.46291	2006-09-14
1.3968	0.951983	1.28822	0.333427	1.40967	2006-09-15
1.11574	2.7853	1.19843	0.399119	1.17082	2006-09-16
0.696875	0.489997	0.782358	0.256298	0.80047	2006-09-17
1.08645	0.834071	0.859624	0.0546653	0.994215	2006-09-18
1.1455	0.773857	1.59272	1.09581	1.32665	2006-09-19
0.956237	1.28174	1.03409	2.24009	1.06266	2006-09-20
0.61498	0.674153	0.623765	3.87182	0.698805	2006-09-21
0.908953	0.593098	1.00842	3.1399	1.05181	2006-09-22
1.00726	0.795854	1.15701	3.57544	1.17576	2006-09-23
1.20826	2.06673	1.29224	5.97987	1.38275	2006-09-24
1.18801	3.59484	1.94766	2.71553	2.09095	2006-09-25
0.941503	1.44631	10.2839	1.48383	10.5411	2006-09-26
0.681368	0.65969	0.854239	15.216	1.10829	2006-09-27
0.832776	1.52396	0.857079	6.08995	0.931111	2006-09-28
0.756181	0.850282	0.756884	5.25639	0.80485	2006-09-29
0.564598	0.496928	0.655716	3.0226	0.649649	2006-09-30
0.421638	0.336559	14.9773	4.0857	0.517496	2006-10-01
0.742412	0.679699	0.852023	9.40762	0.834488	2006-10-02
0.875959	0.813699	89.6847	5.70247	0.961176	2006-10-03
0.835145	0.835533	48.5115	30.3356	1.00733	2006-10-04
0.982482	0.923144	1.40096	3.39866	1.06709	2006-10-05
0.659886	1.11382	0.638309	2.44849	0.656724	2006-10-06
0.401152	0.380935	1.69197	4.62938	0.445401	2006-10-07
0.391761	0.360299	0.485951	4.66278	0.45468	2006-10-08
0.95295	1.04879	0.958323	2.25593	1.06889	2006-10-09
0.733235	1.32213	0.864153	7.4592	1.12778	2006-10-10
0.730354	295.462	1.55674	4.7585	1.60511	2006-10-11
1.60641	9.41609	2.28209	2.14976	1.71943	2006-10-12
2.1385	316.167	3.97765	1.64646	2.30231	2006-10-13
3.14488	1.66179	3.90954	11.6474	3.42906	2006-10-14
0.866838	0.868524	1.2996	1.1959	1.3261	2006-10-15
1.52551	1.88966	1.92051	11.2023	1.70843	2006-10-16
0.732873	1.30132	1.00001	0.776462	0.764466	2006-10-17
1.18327	1.88394	1.37442	14.1724	1.28671	2006-10-18
0.941713	1.20565	0.890416	6.45992	0.948822	2006-10-19
0.776048	1.0261	0.930159	1.29019	0.962197	2006-10-20
1.77825	0.789383	1.86585	0.330877	1.98912	2006-10-21
0.559898	0.569543	1.43987	0.182558	1.55517	2006-10-22
1.63268	0.669328	1.83927	0.245995	1.85858	2006-10-23
0.786292	1.11003	0.813283	0.667822	0.800328	2006-10-24
0.832473	0.992068	1.48115	0.225753	1.47121	2006-10-25
1.29994	1.67487	1.2581	0.694443	1.30122	2006-10-26
1.70579	3.01706	1.65267	1.2691	1.67962	2006-10-27
2.79948	1.38911	2.76028	4.32985	2.74075	2006-10-28
0.846818	0.673166	0.957117	1.91064	0.898401	2006-10-29
0.763915	0.78772	0.92752	0.320614	0.932714	2006-10-30
1.28937	1.17242	1.32804	0.732285	1.30814	2006-10-31
5.63733	1.30955	3.31699	0.650711	3.3534	2006-11-01
1.53476	1.6809	1.47183	0.763467	1.48267	2006-11-02
0.877498	0.836397	0.807088	0.475002	0.879037	2006-11-03
1.19944	1.01556	1.08201	0.399464	1.18433	2006-11-04
1.19212	0.913066	1.13802	0.681726	1.23691	2006-11-05
1.73436	1.12195	1.44381	1.76761	1.64979	2006-11-06
1.4931	1.37245	1.25497	0.477554	1.44783	2006-11-07
4.3088	6.39743	4.09316	17.4664	4.08662	2006-11-08
1.5229	1.40203	1.33823	0.775689	1.44741	2006-11-09
1.38651	1.58315	1.26893	0.806134	1.28956	2006-11-10
3.40981	2.99193	97.6309	5.7784	3.4503	2006-11-11
1.3147	0.995375	9.75169	3.44325	1.41429	2006-11-12
1.91523	2.87701	1.77978	0.837362	1.92158	2006-11-13
1.66413	28.0125	1.41358	0.835959	1.69601	2006-11-14
1.78013	1.68782	1.66812	0.804947	1.77279	2006-11-15
2.38302	1.7864	2.87613	1.45657	2.9831	2006-11-16
1.3935	1.1943	1.44915	0.811656	1.47176	2006-11-17
0.52487	0.432077	0.613602	0.396469	0.595449	2006-11-18
0.925067	0.844608	0.979724	0.239363	1.0223	2006-11-19
6.00027	4.34327	6.09748	6.1545	6.16166	2006-11-20
8.72712	15.7087	5.18321	2.96552	8.73091	2006-11-21
5.93296	10.0506	15.5894	20.9317	6.00157	2006-11-22
1.215	1.31555	1.06886	1.07552	1.14255	2006-11-23
0.877144	0.811395	0.887771	0.139933	0.932788	2006-11-24
3.24272	3.66841	3.26241	1.63327	3.29127	2006-11-25
0.903102	0.755028	0.850555	0.523367	0.950852	2006-11-26
1.11363	1.4365	1.93776	0.352446	1.18196	2006-11-27
3.51446	3.65071	37.6392	9.15808	3.72226	2006-11-28
0.997064	35.3247	1.42735	12.4006	1.14623	2006-11-29
1.6589	1.52876	14.5138	1.47468	2.38178	2006-11-30
1.93779	2.23805	1.86412	3.03647	1.90129	2006-12-01
1.09623	0.913143	1.19068	7.75681	1.11997	2006-12-02
0.477826	0.477526	0.849509	1.17686e-05	0.545095	2006-12-03
0.731142	0.644535	1.09499	3.74238	0.851513	2006-12-04
1.53396	1.74472	6.82658	3.06674	4.61208	2006-12-05
0.590475	0.561337	0.606132	2.56446	0.632579	2006-12-06
1.39116	1.32727	1.57606	2.87985	1.63545	2006-12-07
1.51002	1.47405	155.058	5.34634	3.13007	2006-12-08
4.56645	0.988379	3.41895	8.45885	4.24455	2006-12-09
0.868033	1.05416	2.91136	3.16388	2.8599	2006-12-10
1.29525	1.24875	1.92094	2.04143	1.92822	2006-12-11
0.569311	0.52248	1.80798	0.899984	1.89536	2006-12-12
0.825501	0.752966	0.832084	0.478365	0.822262	2006-12-13
2.09249	1.99965	2.25795	5.55162	2.68446	2006-12-14
0.748062	72.6219	0.80642	3.33574	1.17117	2006-12-15
0.457911	0.42854	0.562453	0	0.488364	2006-12-16
1.15764	1.07471	1.21173	1.0719	1.14323	2006-12-17
1.14275	1.0236	5.88047	2.00758	5.87806	2006-12-18
0.874289	0.928313	0.94021	3.37663	0.938638	2006-12-19
1.41404	1.28573	4.76052	3.59284	1.4575	2006-12-20
2.30224	1.87021	2.93146	1.00833	2.03037	2006-12-21
1.275	1.16524	1.23087	0.614075	1.40197	2006-12-22
0.37032	0.383712	0.598431	0.0124077	0.645891	2006-12-23
0.46063	0.420431	0.932376	0.719553	0.830159	2006-12-24
0.592195	0.536755	0.870392	0.00252236	1.50815	2006-12-25
2.90316	2.75883	2.9928	1.26478e-06	3.43404	2006-12-26
0.835469	0.812537	0.948344	0.022921	1.12764	2006-12-27
0.363057	0.416056	0.448639	1.38708	0.694805	2006-12-28
0.55009	0.424463	11.412	0.163908	1.08477	2006-12-29
0.479521	0.548719	78.1435	0.186579	1.11513	2006-12-30
0.560298	0.597778	1.42667	0.000837594	0.677162	2006-12-31
0.547023	0.543571	0.764103	0.000668339	0.64174	2007-01-01
1.48476	1.57928	7.31822	4.24232	6.28746	2007-01-02
0.817108	1.15959	6.39655	5.30836	6.54599	2007-01-03
1.27331	1.37016	5.24524	4.84097	5.24106	2007-01-04
1.32134	2.6231	4.73513	2.69169	4.43605	2007-01-05
1.38568	1.87494	1.41588	1.93568	1.44761	2007-01-06
0.510494	0.469621	0.796739	5.8956	0.574969	2007-01-07
1.84053	1.77992	3.88977	6.97703	1.90008	2007-01-08
1.50176	2.59231	3.84191	4.13249	1.60264	2007-01-09
3.50405	3.4099	9.90694	8.32674	10.3055	2007-01-10
80.6743	95.1633	10.7525	10.5938	36.1225	2007-01-11
19.0999	19.056	4.78587	9.00058	8.59947	2007-01-12
1.2406	1.25049	1.05474	0.595443	1.22687	2007-01-13
1.65806	1.69846	1.51714	0.485556	1.67978	2007-01-14
2.4388	2.24084	13.0907	41.0567	13.4273	2007-01-15
41.2781	39.6443	436.291	16.8782	666.17	2007-01-16
2.88354	2.6739	3.28347	6.35384	3.29952	2007-01-17
2.23741	2.17537	2.22105	4.83542	2.39321	2007-01-18
2.43228	2.3586	2.50568	80.3735	2.63961	2007-01-19
2.03384	5.2236	1.44812	1.36461	1.74761	2007-01-20
2.31323	2.50107	1.53966	30.66	2.22936	2007-01-21
2.36657	2.40158	2.25104	1.53476	2.34436	2007-01-22
26.2565	27.9711	119.79	4.81621	25.9473	2007-01-23
5.21125	319.383	9.31009	6.66036	4.9308	2007-01-24
2.63216	3.36002	2.46236	7.39484	2.86024	2007-01-25
1.7657	1.73753	1.62143	0.625291	1.79342	2007-01-26
1.2804	1.95775	1.87973	0.222344	1.53168	2007-01-27
0.627712	0.643615	0.939457	0.085933	0.929081	2007-01-28
3.17117	74.0864	3.26034	30.0534	3.17094	2007-01-29
6.1381	7.41414	17.2143	84.8539	21.5763	2007-01-30
3.65354	17.2924	3.43883	1.91625	4.18297	2007-01-31
2.02337	1.98335	4.51182	0.309489	2.16644	2007-02-01
3.63735	3.77578	11.303	8.02811	9.01515	2007-02-02
6.24153	6.14131	34.2228	68.5724	5.28713	2007-02-03
2.89325	2.80824	27.8491	44.7647	3.72033	2007-02-04
19.6273	19.4258	20.6165	20.615	20.3024	2007-02-05
3.5845	4.11129	3.34068	4.05504	3.59633	2007-02-06
3.01905	3.06613	2.84585	4.79347	3.06971	2007-02-07
3.92263	3.82381	3.5838	1.65544	3.8962	2007-02-08
3.29085	3.65394	5.32515	0.971033	5.61974	2007-02-09
2.76998	2.18183	2.77632	70.1667	2.96739	2007-02-10
1.3802	1.85097	1.26019	0.726012	1.38526	2007-02-11
2.86494	3.67201	2.43247	1.68255	2.50709	2007-02-12
2.45758	5.82877	4.02562	3.49893	2.6488	2007-02-13
2.69906	9.21462	2.42296	2.0877	2.60056	2007-02-14
2.77576	8.9979	3.67181	2.85153	5.69426	2007-02-15
5.87327	15.7861	5.58099	6.43148	6.04599	2007-02-16
15.3724	7.23475	33.6791	63.1498	45.3997	2007-02-17
5.22369	2.52162	5.28861	4.5276	5.80505	2007-02-18
4.54083	5.9659	5.4126	27.7926	4.51115	2007-02-19
10.7397	10.9127	9.67744	119.938	11.7308	2007-02-20
3.45064	5.00647	3.14898	25.6288	4.05858	2007-02-21
3.14941	3.15609	3.03246	125.754	3.13558	2007-02-22
3.53715	3.59455	2.98734	28.7688	3.27523	2007-02-23
3.77943	3.60464	142.223	0.176057	146.974	2007-02-24
1.49496	1.50829	1.91976	0.203337	1.71352	2007-02-25
2.99856	3.0153	2.02725	0.330737	2.20327	2007-02-26
3.51221	3.47323	3.29862	18.4847	3.65054	2007-02-27
2.22663	2.2231	8.96304	22.6655	2.96745	2007-02-28
2.4851	2.68042	2.07399	6.15801	2.24552	2007-03-01
2.4347	2.4726	2.27734	7.50344	2.34628	2007-03-02
18.5634	4.69729	4.04247	34.8688	20.9923	2007-03-03
3.83628	4.40374	4.30244	89.1839	5.87792	2007-03-04
2.38831	2.40851	2.21991	1.13484	2.37832	2007-03-05
2.58694	2.51077	2.39002	1.15732	2.5844	2007-03-06
2.46355	2.44817	2.26485	76.4898	2.50356	2007-03-07
2.63205	2.9659	2.46364	5.63808	2.65633	2007-03-08
1.83428	1.89589	1.72042	0.341222	1.84162	2007-03-09
1.74173	1.7187	2.20015	0.63068	2.21797	2007-03-10
1.91697	1.88741	1.43358	0.299851	1.69235	2007-03-11
3.06042	77.3361	1.49072	0.363116	1.96136	2007-03-12
2.66241	2.74916	2.32035	0.318949	2.62322	2007-03-13
2.60573	2.52193	2.27039	0.978721	2.4132	2007-03-14
3.75087	3.72642	333.53	213.584	337.969	2007-03-15
2.07522	2.10363	3.97518	35.6769	4.20712	2007-03-16
2.59348	2.60834	1.41902	2.10266	1.94205	2007-03-17
1.43368	1.38993	1.33302	0.638048	1.44926	2007-03-18
1.38206	1.39173	1.31039	1.01595	1.37271	2007-03-19
3.01187	4.08467	1.75104	1.03096	1.913	2007-03-20
4.03454	4.5898	3.40171	38.4489	2.37102	2007-03-21
9.53058	11.2925	9.0906	3.98258	8.58208	2007-03-22
9.19613	8.0614	8.69166	32.475	9.25249	2007-03-23
2.68176	2.63522	2.04671	0.142137	3.82198	2007-03-24
2.09035	2.03157	1.88745	0.209803	2.36251	2007-03-25
1.50248	1.56813	1.97476	0.451282	2.11767	2007-03-26
1.99248	1.90472	2.01287	2.69728	2.05614	2007-03-27
1.6756	1.74675	1.5147	0.842803	1.63842	2007-03-28
1.23631	1.34349	0.97671	2.35258	1.16821	2007-03-29
1.61235	1.7111	1.38965	2.4645	1.56407	2007-03-30
1.52375	1.55583	1.37415	1.44301	1.48877	2007-03-31
3.25629	3.27029	3.09734	31.7863	3.26176	2007-04-01
4.44215	4.49018	4.29329	6.43384	4.33319	2007-04-02
4.76457	4.85092	6.59451	16.1704	4.93693	2007-04-03
7.46094	7.49715	9.36428	7.62572	7.37838	2007-04-04
9.79366	9.78588	9.78872	32.9852	9.01288	2007-04-05
5.03532	4.88482	4.93371	1.51506	5.13022	2007-04-06
2.25066	2.16487	2.16394	0.313933	2.25652	2007-04-07
1.54294	1.57361	1.48179	1.61771	1.55443	2007-04-08
2.72037	2.68734	2.56615	39.7555	2.70172	2007-04-09
3.02307	3.0254	2.99258	2.69375	3.02702	2007-04-10
4.70041	4.81198	4.29074	1.54492	6.14522	2007-04-11
3.59845	3.81315	2.93192	5.46168	6.60635	2007-04-12
6.73822	6.89346	6.57378	5.47578	7.82467	2007-04-13
8.10021	7.97192	6.12455	1.49434	6.40791	2007-04-14
5.94709	5.94573	6.04998	1.48555	5.98237	2007-04-15
10.8797	10.9317	8.22415	53.3443	8.39956	2007-04-16
7.70768	7.69216	7.76722	75.9448	8.06443	2007-04-17
7.11344	7.31277	6.48426	36.0061	6.72299	2007-04-18
42.7239	42.3952	11.1456	41.1439	11.6259	2007-04-19
7.26296	7.27261	5.96019	13.1965	6.48069	2007-04-20
5.38155	5.50581	4.98774	3.87642	5.17234	2007-04-21
2.62345	2.65456	2.41145	2.99069	2.50389	2007-04-22
5.62181	5.7227	4.53583	2.3342	4.73083	2007-04-23
5.40338	5.51034	4.60484	5.38052	5.02776	2007-04-24
2.50961	2.60523	2.48114	1.31291	2.49149	2007-04-25
7.4775	9.52546	7.12316	40.9189	7.08539	2007-04-26
4.51169	4.43622	3.64554	42.5983	4.42763	2007-04-27
2.84917	2.8134	2.74126	23.7532	2.80125	2007-04-28
5.2291	5.14535	5.10521	7.02583	5.27964	2007-04-29
2.74298	2.82561	2.5308	3.61581	2.57133	2007-04-30
3.67886	3.74137	3.53389	40.7286	3.58977	2007-05-01
6.00942	6.11399	5.78648	73.5241	5.88126	2007-05-02
9.22966	9.15989	9.07028	2.44713	9.00365	2007-05-03
7.93397	7.87258	6.05985	37.8211	7.64952	2007-05-04
7.18348	7.03553	7.16621	35.9372	7.32067	2007-05-05
4.02261	3.95745	3.9946	3.96514	4.14375	2007-05-06
4.56873	4.55348	6.37489	2.00186	4.54114	2007-05-07
7.11155	6.91691	11.7678	5.76943	7.28418	2007-05-08
5.39656	5.36467	5.39666	76.7808	8.85499	2007-05-09
8.30825	7.5233	6.63089	68.5841	7.91914	2007-05-10
4.89102	4.83355	7.19595	6.53176	4.81418	2007-05-11
10.0394	9.82274	11.8642	70.9174	10.1199	2007-05-12
6.31706	6.07943	6.7819	2.16277	6.45193	2007-05-13
2.37108	2.50903	1.69335	2.34185	2.29257	2007-05-14
2.33036	2.51155	1.95529	1.28181	2.50159	2007-05-15
2.29969	2.34332	3.41274	63.4813	28.1348	2007-05-16
1.7802	1.92158	3.28121	1.68075	2.90983	2007-05-17
2.80834	2.95042	2.8812	1.11297	2.85639	2007-05-18
1.95546	1.90391	1.9562	34.1689	2.03397	2007-05-19
2.01129	1.97019	2.12094	39.5056	2.03608	2007-05-20
3.87154	4.01426	4.03472	2.66129	3.91575	2007-05-21
4.72246	4.94562	4.83752	3.39382	4.89827	2007-05-22
3.58518	3.65578	5.79138	34.8389	3.63479	2007-05-23
3.81405	3.76378	4.86724	30.4766	3.7759	2007-05-24
3.47724	3.38969	3.34532	58.8167	3.37683	2007-05-25
2.82674	2.83855	2.60741	57.971	2.84671	2007-05-26
2.17087	2.11893	2.26128	30.4984	2.28081	2007-05-27
2.59962	2.97613	2.38484	2.29171	2.45379	2007-05-28
2.44545	2.88498	2.29895	29.498	2.42807	2007-05-29
5.59041	5.76962	4.83859	8.8743	5.2205	2007-05-30
7.65004	7.51846	6.73881	42.7968	6.57561	2007-05-31
6.23163	6.15262	3.25511	30.9016	6.25796	2007-06-01
3.62893	3.7045	2.59901	68.7155	3.49498	2007-06-02
2.41033	2.44165	2.31533	64.4719	2.47605	2007-06-03
3.83429	3.92776	3.71575	4.88745	3.68192	2007-06-04
4.01525	4.08245	3.89419	5.1633	3.89465	2007-06-05
2.25151	2.38499	2.30434	121.25	2.16765	2007-06-06
4.93205	4.9979	6.13064	103.035	5.02703	2007-06-07
5.18053	5.35508	7.48486	13.2559	5.60377	2007-06-08
3.5568	3.63873	12.0433	92.8978	3.68368	2007-06-09
2.14176	2.15959	2.81329	55.6609	1.90501	2007-06-10
5.56842	5.36253	5.09791	90.9734	4.7264	2007-06-11
17.9535	19.7125	13.3973	50.7019	16.6562	2007-06-12
20.413	31.7027	36.5321	226.46	19.866	2007-06-13
18.9203	319.861	45.9198	126.847	52.0995	2007-06-14
58.8355	27.9938	17.0342	92.9456	237.331	2007-06-15
22.8415	24.8766	20.6573	71.1062	26.8425	2007-06-16
8.23542	8.31729	6.17369	5.7847	6.35796	2007-06-17
25.3956	25.508	24.9999	56.6408	25.4797	2007-06-18
27.1138	28.5826	24.1616	53.1713	23.8476	2007-06-19
33.1634	32.7394	44.3003	78.7307	44.5325	2007-06-20
15.8092	15.6793	13.9338	35.9699	13.1543	2007-06-21
15.3527	35.8248	8.58879	13.4481	9.03094	2007-06-22
6.01377	12.4045	6.63894	82.2176	6.01038	2007-06-23
6.70798	17.1488	6.4538	6.75183	6.70206	2007-06-24
9.92578	19.7309	9.73677	45.1052	9.9614	2007-06-25
16.7468	16.9887	6.93873	120.643	14.5491	2007-06-26
38.6157	36.4563	130.804	127.307	188.051	2007-06-27
34.6227	34.5458	37.5128	65.011	54.6091	2007-06-28
12.9899	12.7174	12.5149	105.482	12.7731	2007-06-29
5.45883	6.49511	5.87152	10.1034	6.67774	2007-06-30
5.13768	7.46779	9.5264	2.91684	11.3919	2007-07-01
3.49305	3.60519	5.02754	1.60834	5.6057	2007-07-02
4.2055	4.94631	6.14468	4.31989	5.84446	2007-07-03
2.30851	4.10066	4.82075	3.99778	3.97991	2007-07-04
3.50131	4.07347	4.58403	2.03203	5.12659	2007-07-05
3.42628	3.8763	4.48329	1.76709	4.57052	2007-07-06
3.33873	3.70285	5.78809	1.90596	5.87077	2007-07-07
4.15189	4.91144	4.06979	3.38904	4.13468	2007-07-08
24.4617	27.1545	19.1793	19.7237	14.8882	2007-07-09
3.80221	7.1537	3.16502	55.2293	3.25452	2007-07-10
2.68511	2.7884	3.00808	2.50068	3.79679	2007-07-11
3.1931	3.71154	4.95726	2.56592	6.10401	2007-07-12
2.57178	2.73147	5.62941	5.02313	7.19944	2007-07-13
3.05605	3.08129	4.54794	3.59116	5.39769	2007-07-14
3.99708	3.91205	5.82161	2.66797	7.12699	2007-07-15
4.17123	4.28333	4.76023	3.19191	4.93135	2007-07-16
12.3689	21.477	13.345	12.0462	12.2847	2007-07-17
9.8008	13.0753	11.5892	12.2502	12.7926	2007-07-18
3.6664	4.99799	4.39993	5.05073	5.09814	2007-07-19
2.80033	4.21007	2.68644	2.99519	2.76522	2007-07-20
3.03564	3.03558	3.26929	2.15375	3.59269	2007-07-21
2.89372	2.93675	4.92224	4.5014	5.90438	2007-07-22
3.97078	4.11905	7.47554	11.382	9.85371	2007-07-23
2.26652	2.3481	2.36186	8.42814	2.56531	2007-07-24
1.94925	2.01979	2.30276	4.5669	1.99362	2007-07-25
1.67157	1.76168	1.75468	4.42336	2.01522	2007-07-26
2.17465	2.28839	2.6603	1.44631	2.65109	2007-07-27
1.60484	1.659	2.21512	2.93307	2.26497	2007-07-28
1.77299	1.79601	1.84674	3.29238	1.9791	2007-07-29
2.22056	2.16856	2.60045	3.47737	3.04334	2007-07-30
2.61546	2.65972	2.66401	5.1627	2.96794	2007-07-31
1.69251	1.84428	1.70802	4.89769	1.88208	2007-08-01
1.72252	2.24239	1.707	1.32683	1.71704	2007-08-02
1.65867	1.99174	1.84718	3.06908	1.81692	2007-08-03
2.36437	2.35679	3.07414	3.88985	3.47441	2007-08-04
1.40434	1.78398	1.8605	8.63005	1.76698	2007-08-05
2.24747	3.61246	2.53325	5.39122	3.04761	2007-08-06
1.62636	1.68816	1.98124	102.183	1.78422	2007-08-07
1.84704	2.21454	1.98755	53.2273	2.2939	2007-08-08
2.18601	2.3848	7.10252	97.4478	2.88265	2007-08-09
2.5982	2.66801	174.368	114.813	4.32039	2007-08-10
3.28088	3.38415	2.07223	18.6745	2.4073	2007-08-11
2.44602	2.39783	2.30097	67.628	2.259	2007-08-12
2.14095	2.32929	2.26874	215.502	2.31258	2007-08-13
1.60787	2.21181	1.58407	200.905	1.88479	2007-08-14
1.74179	2.94514	1.89337	53.5667	2.00351	2007-08-15
1.81944	2.15038	2.06713	75.3893	1.92285	2007-08-16
1.96731	2.07278	1.83919	129.956	1.94507	2007-08-17
1.77345	1.84938	6.42372	154.368	1.84079	2007-08-18
3.06161	3.01879	3.75588	90.005	5.02575	2007-08-19
3.0714	3.38314	2.85354	140.504	3.05724	2007-08-20
1.80371	2.88007	1.62252	35.9552	1.80657	2007-08-21
1.45021	1.5875	1.37786	3.52783	1.49439	2007-08-22
1.36803	1.49904	1.42126	32.7944	1.51237	2007-08-23
1.43752	1.66813	1.60572	59.1703	1.62956	2007-08-24
1.45123	1.4811	1.52097	8.0336	1.73424	2007-08-25
1.0809	1.11859	1.30617	17.227	1.33634	2007-08-26
0.828428	1.02726	0.872307	1.76676	0.945827	2007-08-27
1.69449	2.40252	1.82268	40.8767	1.84901	2007-08-28
0.747187	0.940969	0.856552	25.8976	0.931855	2007-08-29
2.142	2.40091	2.13024	88.5491	2.25747	2007-08-30
1.42341	1.47389	2.65798	44.7252	1.85525	2007-08-31
1.13861	2.1316	1.00685	1.96221	1.13402	2007-09-01
0.80206	0.847271	1.15372	1.25232	1.04591	2007-09-02
3.01339	3.02271	4.35023	55.2402	3.0085	2007-09-03
3.38739	3.48852	4.51025	176.188	69.7822	2007-09-04
4.95212	4.94474	4.95963	73.535	139.783	2007-09-05
1.65081	1.69577	1.3661	30.1119	4.07376	2007-09-06
1.89875	44.4959	2.1599	27.3074	1.76272	2007-09-07
1.47851	1.57673	1.10008	31.3691	1.44657	2007-09-08
2.11419	2.13099	1.89841	32.5765	1.99856	2007-09-09
1.3184	1.3976	1.3208	44.4389	1.12234	2007-09-10
1.11463	1.18443	1.47811	129.888	1.10178	2007-09-11
1.40592	1.60717	1.42018	0.360112	1.37136	2007-09-12
3.05174	6.89047	2.80269	26.6757	2.37887	2007-09-13
2.3071	7.31033	2.34658	30.9825	2.27095	2007-09-14
1.72799	2.76619	1.66643	1.69452	1.71399	2007-09-15
2.2119	12.2482	2.0733	32.3791	2.22789	2007-09-16
1.68285	12.5981	1.56061	55.2654	1.63232	2007-09-17
2.64944	6.51546	2.55382	0.688374	2.63277	2007-09-18
1.22785	1.27439	2.46273	0.583811	2.65286	2007-09-19
4.03744	11.7689	4.05846	114.559	3.4951	2007-09-20
2.45003	2.53781	2.05236	0.673674	2.39103	2007-09-21
5.15288	5.84068	5.282	29.7573	6.45168	2007-09-22
4.02461	4.11086	3.98992	33.8338	3.734	2007-09-23
4.32683	55.7307	2.91244	158.188	3.14574	2007-09-24
3.37261	3.87274	5.01622	218.129	5.98646	2007-09-25
1.68904	5.57653	3.86494	31.24	4.23842	2007-09-26
1.73584	7.03679	1.45786	1.54758	1.75174	2007-09-27
2.15432	9.98119	1.86777	1.0756	2.0919	2007-09-28
2.27937	2.27977	2.15784	2.16031	2.60892	2007-09-29
3.13442	2.9822	2.91818	108.225	3.3017	2007-09-30
6.57191	6.59045	6.3731	17.4478	6.31256	2007-10-01
2.91283	2.45148	2.68046	94.9881	2.90949	2007-10-02
4.9038	4.92309	4.38498	86.7033	4.71572	2007-10-03
2.40889	3.7492	2.25091	58.7876	2.33246	2007-10-04
2.60167	23.3472	1.77448	68.3847	2.79233	2007-10-05
2.30221	79.8838	4.58538	56.8157	4.82804	2007-10-06
1.61826	45.8033	1.49744	52.0829	1.76954	2007-10-07
3.59164	155.231	3.26141	45.0151	3.65244	2007-10-08
6.71291	46.529	4.58049	18.4693	6.54028	2007-10-09
2.23996	55.2155	1.91588	47.1257	2.27364	2007-10-10
4.66373	59.4321	4.37431	179.123	4.64451	2007-10-11
2.59723	8.85191	2.74567	75.5607	2.79907	2007-10-12
0.966782	1.00132	1.30912	26.6164	1.67145	2007-10-13
1.42348	1.4984	1.43446	23.4303	1.46008	2007-10-14
7.87691	7.72911	2.4228	7.43271	4.75499	2007-10-15
3.82968	3.84511	5.04115	22.0837	4.80525	2007-10-16
2.95761	2.92355	3.24511	88.5306	3.03629	2007-10-17
2.07272	2.09786	1.91035	20.4486	2.5061	2007-10-18
6.65309	6.68827	6.6055	8.20993	7.73599	2007-10-19
1.25314	1.27119	1.25498	1.48226	1.27026	2007-10-20
3.21076	2.94676	3.11926	18.521	3.2339	2007-10-21
31.0885	15.045	16.7873	47.9593	17.1281	2007-10-22
5.48609	25.6154	4.73769	46.1055	5.28984	2007-10-23
4.75272	119.326	4.72751	56.181	4.63911	2007-10-24
4.42747	10.9285	3.58632	30.2248	3.92009	2007-10-25
4.80633	58.3495	4.77676	37.5778	5.18867	2007-10-26
2.17173	8.60389	2.67325	52.7655	3.33429	2007-10-27
2.84805	7.56772	2.81097	44.1012	2.94593	2007-10-28
1.77467	52.7149	1.8415	54.3066	1.82072	2007-10-29
2.19078	15.0817	2.19433	56.187	2.24732	2007-10-30
1.83911	14.3183	1.74049	100.35	1.80586	2007-10-31
1.7318	7.71902	1.58796	53.747	1.76408	2007-11-01
1.01867	16.0308	1.6119	1.44337	2.05026	2007-11-02
1.74554	2.59504	10.3297	4.66714	1.7921	2007-11-03
2.57835	384.639	2.9239	1.69832	2.93275	2007-11-04
1.45155	2.66006	1.62707	23.0981	1.57478	2007-11-05
1.25193	1.36018	1.16791	0.377958	1.40512	2007-11-06
2.97076	3.07012	4.29495	18.2799	4.22952	2007-11-07
1.50643	1.55341	1.44641	0.312866	1.5271	2007-11-08
2.06829	2.0912	2.12627	0.450613	2.16161	2007-11-09
2.15401	2.1555	2.09887	1.01754	2.21114	2007-11-10
2.01816	2.81353	1.99766	0.0013783	2.07003	2007-11-11
1.61967	1.58496	1.64933	1.48402	1.66218	2007-11-12
1.62048	1.42041	6.32123	26.8512	1.96574	2007-11-13
1.42145	2.15815	1.80987	14.151	4.75673	2007-11-14
2.12497	2.23997	2.69715	57.4942	3.25289	2007-11-15
1.71141	1.91064	62.7294	43.488	63.652	2007-11-16
1.60251	1.6077	98.9931	34.2624	155.451	2007-11-17
1.45588	1.49641	4.40687	52.5533	5.41326	2007-11-18
4.69952	14.2966	4.6671	85.2124	4.8297	2007-11-19
1.23377	1.36312	9.63958	24.0724	2.68476	2007-11-20
2.57016	9.19173	2.28883	27.6644	2.84149	2007-11-21
3.39544	57.9603	3.45204	0.485527	4.06032	2007-11-22
2.35454	2.40859	1.9511	26.5873	2.41643	2007-11-23
1.79909	1.89282	1.79964	0.262327	2.48175	2007-11-24
0.750646	0.746974	0.860825	0.0891364	1.04473	2007-11-25
2.0447	2.08751	1.9635	0.414718	2.09394	2007-11-26
1.17519	1.24939	1.0611	25.7255	1.29359	2007-11-27
2.59142	2.32122	2.30164	1.49395	2.61676	2007-11-28
2.24844	4.27195	2.12617	1.83162	2.37212	2007-11-29
1.91726	82.8407	1.78015	0.220329	1.89559	2007-11-30
2.0323	3.16762	3.79758	1.45877	4.08924	2007-12-01
1.17084	15.3076	1.55762	1.28207	1.75137	2007-12-02
1.08748	1.16342	2.19867	29.3228	2.55755	2007-12-03
1.40313	1.71911	3.71068	1.76837	4.01489	2007-12-04
1.50609	2.58392	1.55751	28.6394	2.33883	2007-12-05
30.4727	39.2603	17.3788	132.931	32.939	2007-12-06
1.71748	55.2041	4.75796	108.347	2.47387	2007-12-07
1.25109	8.94095	1.42221	0.349188	1.97964	2007-12-08
0.915866	2.33043	1.09774	2.21506	0.929905	2007-12-09
1.09103	65.1648	1.66437	62.6636	2.16751	2007-12-10
0.786751	62.416	0.993166	26.5948	1.3139	2007-12-11
0.830214	4.70773	0.86246	0.750195	0.88317	2007-12-12
1.24254	1.22924	1.4853	0.514847	1.80281	2007-12-13
1.26693	1.24717	1.28734	72.0794	1.5702	2007-12-14
0.5193	0.487478	0.66921	1.25948	0.933136	2007-12-15
0.363269	0.462621	0.450663	0.125274	0.495906	2007-12-16
1.50692	2.09788	1.91572	45.0048	2.03213	2007-12-17
0.61192	0.61339	1.84685	1.089	3.28019	2007-12-18
1.08258	1.16773	2.28425	31.1655	3.2363	2007-12-19
2.65654	2.74528	5.01196	10.8009	6.48677	2007-12-20
1.09511	1.11799	1.37961	2.29619	1.73663	2007-12-21
0.965344	0.948142	0.959859	2.38277	1.06236	2007-12-22
0.565523	0.568154	0.631739	0.535244	0.593563	2007-12-23
0.702303	0.670292	0.844275	11.567	0.79614	2007-12-24
1.04437	1.08784	1.0687	28.4209	1.04011	2007-12-25
1.31165	1.32831	1.3717	0.207819	1.36442	2007-12-26
0.824852	0.806188	0.76507	2.22478	0.899126	2007-12-27
1.94712	7.4483	1.87368	5.50919	1.94329	2007-12-28
5.83006	11.3658	5.45676	3.26693	5.77853	2007-12-29
0.960044	0.94574	37.993	5.94519	5.77756	2007-12-30
37.7403	38.096	64.4127	6.28451	131.627	2007-12-31
2.12155	2.58576	62.8628	0.998167	8.00667	2008-01-01
1.45688	1.62911	1.82115	0.518603	1.45047	2008-01-02
3.10253	3.78961	3.53318	0.635042	3.15341	2008-01-03
2.63802	2.61803	28.931	1.83911	23.1178	2008-01-04
1.76107	1.78173	2.82572	26.1461	2.98163	2008-01-05
1.44655	1.57305	1.42835	15.8853	1.526	2008-01-06
1.38069	54.0899	1.34846	4.38071	1.41119	2008-01-07
1.04803	6.03489	1.06714	3.25475	1.11296	2008-01-08
0.787361	0.754175	0.782424	2.36092	0.971352	2008-01-09
7.17534	8.60338	34.9645	1.86798	29.1441	2008-01-10
0.947213	1.19565	5.64485	4.41216	8.22853	2008-01-11
0.778143	0.706661	0.827953	3.15446	0.861551	2008-01-12
1.13033	1.18316	1.30781	2.12562	1.60633	2008-01-13
0.96971	0.959419	4.25792	1.15559	6.31476	2008-01-14
1.2779	2.02306	1.27554	1.71854	1.34196	2008-01-15
0.932435	0.893913	4.64006	7.22784	7.06176	2008-01-16
0.769589	0.702047	1.41955	4.77795	1.72877	2008-01-17
1.40296	1.33257	3.04089	3.96621	1.57854	2008-01-18
1.17605	1.1844	1.24472	1.74331	1.24165	2008-01-19
3.04734	3.12197	3.16216	3.88186	3.08377	2008-01-20
2.50755	12.847	2.37126	3.19243	2.48865	2008-01-21
1.57323	1.41197	1.61488	2.07341	1.67285	2008-01-22
1.56859	1.47656	1.65047	1.1949	1.69218	2008-01-23
1.2801	1.20068	1.31106	1.19119	1.3718	2008-01-24
1.22382	1.22812	1.455	1.23472	1.67445	2008-01-25
1.01879	0.948138	21.9495	8.30241	25.8299	2008-01-26
1.87087	1.84927	2.0023	6.15932	1.99008	2008-01-27
1.87502	1.89921	1.98584	1.41559	1.97488	2008-01-28
1.31329	1.68524	1.29392	1.33888	1.36015	2008-01-29
2.97592	120.092	10.9296	9.00466	11.9995	2008-01-30
1.03487	37.0296	1.0685	2.52121	1.07209	2008-01-31
1.75185	1.69905	1.72521	1.85197	1.81024	2008-02-01
1.40128	1.20183	1.46813	1.44909	1.39076	2008-02-02
2.02108	1.93349	2.96936	2.41925	2.6679	2008-02-03
2.2663	71.8562	46.8609	9.12513	47.8588	2008-02-04
0.967142	3.20103	1.04283	3.24171	1.0881	2008-02-05
1.5029	2.53056	1.54105	1.30791	1.62753	2008-02-06
1.8808	88.5827	2.06934	2.31467	2.04057	2008-02-07
1.08336	53.4606	1.14231	4.06185	1.18713	2008-02-08
2.39824	2.31063	2.46913	7.93826	2.46938	2008-02-09
1.6836	1.66525	1.79538	2.45673	1.80133	2008-02-10
1.38024	1.32957	1.83415	0.670245	1.92136	2008-02-11
0.957986	0.821197	1.06971	1.12222	1.07653	2008-02-12
1.77228	3.29809	1.90031	0.882791	1.87829	2008-02-13
1.78626	1.65899	2.09284	3.51282	2.11575	2008-02-14
2.43208	2.27276	54.3735	27.9054	54.9934	2008-02-15
4.46757	4.13423	19.4614	15.6017	73.533	2008-02-16
1.61078	1.55377	2.15274	2.94243	2.2371	2008-02-17
10.2425	9.37775	46.5355	13.0179	89.9923	2008-02-18
3.28538	3.02033	81.558	12.8754	12.9497	2008-02-19
1.19327	39.9944	1.23206	1.51366	1.24449	2008-02-20
1.33131	69.3425	1.29009	2.88769	1.32249	2008-02-21
1.00041	267.368	1.02088	2.50059	1.16915	2008-02-22
1.7959	167.721	3.76032	1.92743	4.20108	2008-02-23
2.21655	2.19519	2.27543	5.62837	2.25709	2008-02-24
1.94099	1.90338	2.01654	3.23524	2.00015	2008-02-25
1.73535	1.695	1.70164	2.23739	1.75365	2008-02-26
1.39431	1.35156	1.43242	1.19774	1.47963	2008-02-27
2.76105	30.4994	2.7477	1.6504	2.83007	2008-02-28
1.84208	1.81906	1.91813	1.2097	1.96349	2008-02-29
2.00298	1.92441	2.12079	2.14218	2.12175	2008-03-01
2.05713	2.02575	2.18879	1.33722	2.19371	2008-03-02
1.60296	2.13422	2.86622	1.32587	3.01857	2008-03-03
3.38819	38.5888	5.44646	2.17832	5.84732	2008-03-04
2.69475	9.15386	104.085	1.47686	3.17751	2008-03-05
2.72237	4.91876	42.193	8.67331	2.76288	2008-03-06
4.34294	3.76151	38.8116	2.61654	4.48676	2008-03-07
4.4035	4.19392	4.26814	1.30463	4.77077	2008-03-08
2.70908	2.60415	2.74406	3.48292	3.19981	2008-03-09
3.39837	3.34691	12.8313	33.0737	6.39166	2008-03-10
2.56558	2.45835	13.2729	2.507	2.4735	2008-03-11
2.25869	1.97923	42.8343	1.63007	2.44814	2008-03-12
3.10174	3.06018	44.4105	2.61693	4.71381	2008-03-13
9.81994	9.42375	6.79932	6.06774	6.89643	2008-03-14
1.82303	6.69904	2.01864	8.0907	2.05533	2008-03-15
4.38033	4.23551	8.44411	4.68544	8.63114	2008-03-16
35.7298	33.4068	68.245	2.17403	72.6051	2008-03-17
2.23759	1.82219	2.67957	2.63878	3.5541	2008-03-18
1.81621	1.79257	1.64722	2.75114	1.7961	2008-03-19
1.0208	1.01693	1.10288	0.481244	1.35176	2008-03-20
0.76406	33.9422	0.881078	0.468431	0.853524	2008-03-21
0.776581	3.38296	0.866088	0.273393	0.865172	2008-03-22
2.16138	2.10378	2.35238	0.375951	2.2974	2008-03-23
1.7733	11.2329	2.05981	2.10851	1.99128	2008-03-24
4.75568	4.82376	4.9492	7.94949	4.96735	2008-03-25
1.04252	16.7296	2.09268	3.44383	2.28405	2008-03-26
1.8324	75.9889	4.99065	5.47592	5.2485	2008-03-27
0.953518	2.10299	1.45974	4.01769	1.66698	2008-03-28
1.6587	5.03354	3.70856	6.22784	3.9243	2008-03-29
2.02913	2.56029	2.79163	2.58103	3.12463	2008-03-30
1.53712	14.6158	14.551	5.61868	14.7563	2008-03-31
2.61829	51.823	3.36234	2.76168	3.46127	2008-04-01
1.79567	1.66853	1.16086	3.57328	2.72694	2008-04-02
1.77739	1.65728	2.8365	2.55523	3.11596	2008-04-03
1.17903	1.14904	6.05125	7.48344	6.22694	2008-04-04
0.567923	0.558458	0.536748	7.03226	1.0375	2008-04-05
0.50216	0.526106	0.570531	3.7537	0.72405	2008-04-06
4.30721	4.40583	6.29837	2.03913	6.53439	2008-04-07
1.84571	20.9843	2.2417	2.15148	2.40356	2008-04-08
1.23583	1.2702	5.3295	4.38224	5.40386	2008-04-09
1.96627	4.848	4.65461	1.54683	4.96257	2008-04-10
1.26452	1.29666	1.04646	1.02557	1.23388	2008-04-11
0.917492	0.882477	0.869214	1.43635	0.991541	2008-04-12
1.03141	1.02756	0.970511	1.18279	1.08383	2008-04-13
2.18912	2.18163	2.00651	1.67455	2.08649	2008-04-14
2.02793	2.06405	2.51661	1.27728	2.71462	2008-04-15
1.67172	1.67179	1.70268	1.35408	1.89276	2008-04-16
1.74749	2.21985	1.38996	2.39652	1.56187	2008-04-17
1.76614	5.73225	1.64458	1.49595	1.76637	2008-04-18
1.00385	15.8577	2.28944	1.51145	2.2216	2008-04-19
1.24073	1.18372	1.19187	3.89131	1.28633	2008-04-20
1.86617	2.39718	2.5913	1.49807	2.82114	2008-04-21
1.62722	2.25959	1.37003	2.64795	1.54832	2008-04-22
1.01688	1.42248	0.930735	1.90453	1.06117	2008-04-23
1.0294	1.16336	0.771812	1.19639	1.05065	2008-04-24
2.32256	1.56971	2.36324	7.79019	2.5493	2008-04-25
1.66089	1.2156	4.07784	47.5518	4.14953	2008-04-26
1.41345	1.39565	2.18073	3.77864	2.28984	2008-04-27
2.39476	2.97775	2.18907	67.7613	2.33423	2008-04-28
1.7817	2.34865	2.30621	68.1511	2.37339	2008-04-29
2.41343	3.42566	3.01261	1.34069	2.98123	2008-04-30
3.42244	4.39741	3.74389	1.93066	4.13527	2008-05-01
3.34759	3.30534	3.8105	89.4395	4.38568	2008-05-02
1.12345	1.16187	1.05318	4.25708	1.45537	2008-05-03
1.26497	1.25618	1.69503	28.3251	1.8534	2008-05-04
1.74985	1.56741	6.03492	3.71796	6.40869	2008-05-05
1.62816	1.65206	2.10405	29.261	2.49058	2008-05-06
1.99656	1.98939	4.01534	3.51489	4.61406	2008-05-07
2.3344	3.73601	2.06179	13.7605	2.09931	2008-05-08
2.90671	2.28708	3.06743	33.4205	3.54055	2008-05-09
3.17075	2.9841	2.94109	3.40788	3.24094	2008-05-10
2.28319	2.17266	3.27065	29.2503	3.85775	2008-05-11
3.97553	3.82372	3.64285	51.4251	4.06904	2008-05-12
6.80121	9.61745	7.53149	175.025	7.8843	2008-05-13
3.93453	6.23992	3.79416	36.2998	4.33049	2008-05-14
1.73708	1.69559	0.922767	51.7386	2.12873	2008-05-15
3.75641	4.48148	2.86452	5.76213	3.20106	2008-05-16
2.71402	3.08063	6.20421	139.305	6.54054	2008-05-17
1.54996	1.50163	4.22174	5.31649	5.85363	2008-05-18
1.98403	1.90333	5.16215	38.2492	7.85957	2008-05-19
1.77886	2.22514	1.72003	7.91538	2.12334	2008-05-20
1.81668	1.86937	1.63362	2.13819	1.88708	2008-05-21
2.21678	2.2822	1.46347	6.27495	2.11421	2008-05-22
2.41308	2.47165	1.82908	1.45047	2.31265	2008-05-23
1.85114	2.35003	1.24215	5.02074	1.76951	2008-05-24
1.77287	1.74912	1.70781	5.64436	1.78815	2008-05-25
1.07388	1.0403	1.07418	28.4941	1.32929	2008-05-26
2.56	2.55004	1.89166	2.21422	2.46985	2008-05-27
3.26824	3.70133	2.93551	1.97101	3.06372	2008-05-28
2.5014	2.88963	1.6752	1.61499	2.45204	2008-05-29
2.59169	2.45423	1.61012	1.58727	2.59657	2008-05-30
1.10553	1.59659	1.07812	1.50691	1.25705	2008-05-31
1.6333	1.42224	2.12307	3.58026	2.57174	2008-06-01
2.02709	1.81805	1.40959	2.47282	2.14604	2008-06-02
1.5661	1.97205	1.31294	2.27599	1.57449	2008-06-03
2.50782	2.83612	2.65973	1.73168	2.83035	2008-06-04
2.46145	2.62081	1.85509	1.54289	2.41537	2008-06-05
2.137	2.35312	1.3471	2.1738	2.14208	2008-06-06
1.32473	1.57489	1.11538	1.61733	1.35033	2008-06-07
1.47143	1.37765	1.53463	4.41109	2.87628	2008-06-08
1.71889	1.68237	1.88038	14.067	1.85711	2008-06-09
1.50103	1.33796	1.20917	75.009	1.39608	2008-06-10
1.76594	1.73466	1.82324	1.52736	1.97059	2008-06-11
1.96968	1.93771	2.2996	2.97552	2.21877	2008-06-12
2.53354	2.51887	2.34757	1.41345	2.56081	2008-06-13
1.5241	1.55634	1.40253	1.61194	1.55626	2008-06-14
2.06868	2.06471	1.94158	3.07822	2.06568	2008-06-15
1.3785	1.39203	1.27882	1.91842	1.3935	2008-06-16
1.36436	1.37221	1.12447	1.02527	1.42805	2008-06-17
1.21144	1.22779	1.23084	0.674583	1.8303	2008-06-18
1.64997	1.7122	1.6149	0.790806	1.93108	2008-06-19
2.0203	1.95892	1.75295	3.65925	2.03639	2008-06-20
1.986	1.96004	2.23468	1.14613	2.12573	2008-06-21
1.56414	54.4402	1.70099	1.75449	2.14291	2008-06-22
3.15486	56.5738	3.11508	3.0806	3.104	2008-06-23
1.85258	46.6978	1.49008	2.5633	1.73677	2008-06-24
1.21599	1.1567	1.05455	4.568	1.19081	2008-06-25
1.66577	1.63832	1.43762	13.1474	1.66979	2008-06-26
2.13239	2.05356	1.83715	16.1378	2.10711	2008-06-27
2.28011	2.19206	1.96779	29.3167	2.34071	2008-06-28
6.23974	10.0316	6.088	254.984	6.20683	2008-06-29
2.94196	2.93328	2.77292	168.632	2.77004	2008-06-30
2.32728	2.07234	2.10363	118.602	2.36557	2008-07-01
1.24675	1.17532	1.13583	95.546	1.36072	2008-07-02
1.79489	1.71325	1.69485	229.225	1.80807	2008-07-03
1.25163	1.3183	1.15346	20.2757	1.43563	2008-07-04
1.87354	1.84562	1.91064	4.95724	1.99501	2008-07-05
2.12472	1.97383	2.15452	3.69553	2.16927	2008-07-06
2.80997	2.51843	2.08625	196.052	2.65269	2008-07-07
41.7126	41.8618	39.8654	110.618	41.2687	2008-07-08
1.90525	1.64991	1.59509	28.9438	1.9312	2008-07-09
1.61649	1.60401	1.68037	5.62389	1.59188	2008-07-10
1.6672	1.54242	1.36611	0.000789029	1.43187	2008-07-11
1.81013	1.90787	2.17322	0.000140136	2.59408	2008-07-12
2.87654	2.86931	2.82015	0.816566	2.97403	2008-07-13
3.15114	3.13252	3.02062	0.000887037	3.02791	2008-07-14
1.8511	1.99509	1.65977	0.000280563	2.00825	2008-07-15
2.21054	10.6721	1.93045	0.815964	2.19334	2008-07-16
2.13531	2.69017	1.90334	7.98985	2.16202	2008-07-17
2.44248	3.37607	3.07286	9.73384	3.34348	2008-07-18
2.60321	11.6949	2.62532	3.4773	2.91097	2008-07-19
2.24902	2.10762	3.18237	9.8335	3.76025	2008-07-20
2.12976	2.08073	2.20655	206.592	2.27849	2008-07-21
2.56337	2.42341	1.9193	117.099	2.17985	2008-07-22
33.9682	34.3202	34.3663	140.596	34.317	2008-07-23
1.94761	1.9315	1.63461	2.16593	1.87379	2008-07-24
2.31601	3.16164	1.89478	2.55114	2.01481	2008-07-25
1.85014	2.83992	1.70446	1.00802	2.05704	2008-07-26
2.95191	3.87023	1.83176	1.86671	1.91149	2008-07-27
2.23206	3.1138	1.91441	33.5164	2.10286	2008-07-28
1.58314	1.49431	1.24352	1.377	1.48229	2008-07-29
2.25243	1.95774	2.03438	9.4967	2.52623	2008-07-30
2.22768	2.33206	2.43248	3.3563	2.76515	2008-07-31
1.87504	1.3725	1.92725	1.08724	1.77183	2008-08-01
1.91301	2.47167	1.79642	1.72002	2.16392	2008-08-02
2.04511	2.00042	2.04526	1.87575	2.14028	2008-08-03
1.92284	1.86392	1.61131	3.22413	1.94529	2008-08-04
1.88676	1.50441	1.5069	0.561285	1.51049	2008-08-05
1.28777	2.39237	0.957668	28.0145	1.32262	2008-08-06
1.91701	1.83851	1.88543	1.52644	2.16754	2008-08-07
2.28325	2.17772	1.98688	2.20123	2.31155	2008-08-08
1.38384	1.40266	1.3368	1.36885	1.39445	2008-08-09
2.09394	2.22874	2.19972	2.83484	2.1091	2008-08-10
3.46932	3.02139	2.67819	38.6069	2.74782	2008-08-11
2.46119	2.41211	2.32752	59.8595	3.10242	2008-08-12
1.8183	1.70986	1.52132	24.2264	1.74525	2008-08-13
2.15583	2.10425	6.01776	76.8418	2.07859	2008-08-14
2.07326	2.02096	1.85962	64.256	2.57619	2008-08-15
1.56207	1.46927	1.54391	3.16476	4.35035	2008-08-16
2.20109	2.13922	1.83972	1.72546	1.95979	2008-08-17
1.87032	1.66341	1.54405	0.929116	1.84831	2008-08-18
2.37725	2.33856	1.8983	1.32673	3.74627	2008-08-19
1.60754	1.47828	1.41856	1.29719	1.60475	2008-08-20
1.58338	1.25581	1.43346	3.25962	1.30802	2008-08-21
2.69192	2.91778	2.20562	29.6726	6.27566	2008-08-22
2.22335	2.38319	2.0316	40.2892	2.13121	2008-08-23
1.65794	1.71769	1.43599	1.53581	1.84965	2008-08-24
2.82059	3.18798	2.32457	2.01817	5.52735	2008-08-25
1.54026	1.4196	1.32861	23.8929	1.36931	2008-08-26
1.48815	2.79123	1.37767	1.93223	2.19584	2008-08-27
2.16274	2.95547	1.93499	5.40254	3.18493	2008-08-28
2.93531	2.51095	2.66429	1.20332	2.57277	2008-08-29
1.64965	1.52201	1.72375	4.31449	1.80802	2008-08-30
1.60408	1.52564	1.76098	3.57952	1.63826	2008-08-31
1.44564	1.73409	1.1946	1.40245	1.18551	2008-09-01
2.00595	2.12898	1.33503	2.13463	1.9909	2008-09-02
3.20574	4.18355	1.33539	2.19221	3.14532	2008-09-03
2.46561	2.40477	1.71735	1.30619	2.4572	2008-09-04
2.67452	1.70504	2.3484	1.73092	2.55172	2008-09-05
2.65438	3.68544	2.24478	33.3959	2.61439	2008-09-06
2.27055	2.16341	2.19059	1.22506	2.31565	2008-09-07
1.42058	5.72136	1.41365	0.865268	1.45087	2008-09-08
1.75465	8.93618	1.62083	2.45091	1.54944	2008-09-09
3.11474	5.58347	2.25006	1.30727	2.8917	2008-09-10
3.24123	2.4636	7.35999	1.33419	2.77473	2008-09-11
2.29635	1.92113	2.98924	135.999	2.1492	2008-09-12
1.61015	1.63323	1.88213	1.07194	1.70925	2008-09-13
1.27347	1.20948	1.30103	0.163157	1.2692	2008-09-14
2.57536	2.57412	2.6641	1.2226	2.6479	2008-09-15
2.29802	2.53168	1.86999	2.946	2.37757	2008-09-16
3.35113	5.37045	2.89517	4.33831	5.35908	2008-09-17
2.14418	2.00302	7.55944	15.1212	2.28297	2008-09-18
1.87548	1.78837	2.33954	83.1273	1.89381	2008-09-19
5.52484	81.685	471.434	7.77931	5.56504	2008-09-20
3.83364	3.80942	2.61257	4.7091	3.96355	2008-09-21
5.97087	6.49251	3.52917	50.8172	7.48277	2008-09-22
9.06991	9.83663	34.5853	49.3122	11.2056	2008-09-23
3.1449	2.70576	5.88954	145.645	8.25027	2008-09-24
3.03209	2.53314	3.05028	43.5603	3.60096	2008-09-25
2.60719	2.54125	1.89717	84.6002	2.04643	2008-09-26
1.13791	1.0999	1.40619	55.1827	1.21986	2008-09-27
1.18427	1.21936	2.82916	18.0337	1.6694	2008-09-28
1.58781	1.52691	2.11148	49.3762	1.78223	2008-09-29
1.58545	1.54384	1.51889	32.306	1.66847	2008-09-30
1.83717	1.81691	5.85258	70.937	1.75209	2008-10-01
2.52088	2.03863	1.78649	46.1433	2.79777	2008-10-02
2.9681	2.89697	2.34177	71.7997	3.02291	2008-10-03
2.3206	2.17794	1.85471	22.6947	2.49799	2008-10-04
1.71079	1.61144	1242.76	69.7647	1.77354	2008-10-05
2.85903	2.77222	12.5735	127.583	5.67485	2008-10-06
4.28339	4.03564	6.74701	54.9477	7.15091	2008-10-07
4.0375	4.11217	4.27814	99.1725	4.70299	2008-10-08
2.28883	1.71325	4.33992	158.14	4.96793	2008-10-09
3.31647	3.12941	3.36213	39.2271	3.55671	2008-10-10
2.07848	2.22669	2.05007	30.8077	3.30998	2008-10-11
1.19387	1.14203	162.634	27.13	2.50239	2008-10-12
4.20988	4.07602	3.76116	5.68823	3.91733	2008-10-13
1.92685	1.79679	1.68438	27.3051	1.89874	2008-10-14
3.43217	4.1181	3.33681	3.29991	3.42747	2008-10-15
3.12199	4.57853	2.86382	2.78705	3.00711	2008-10-16
4.28297	3.88189	4.15018	1.51685	5.98414	2008-10-17
1.57798	1.45263	1.95966	0.718735	2.23411	2008-10-18
1.27792	1.3133	1.37244	0.365966	1.55686	2008-10-19
1.14748	1.07963	1.6175	0.674962	1.88047	2008-10-20
1.42708	1.31781	1.51373	5.84292	1.70045	2008-10-21
1.19883	1.17603	1.09776	3.05614	1.36015	2008-10-22
2.08977	1.66228	2.13321	2.86274	2.24556	2008-10-23
4.23633	3.62232	4.87923	0.779473	5.33795	2008-10-24
1.40547	1.35929	1.67447	0.363156	1.67795	2008-10-25
1.34901	1.2394	1.47002	0.491569	1.49874	2008-10-26
3.33282	3.25118	3.54946	0.881954	3.30642	2008-10-27
2.1514	2.16876	3.19088	1.08452	2.81373	2008-10-28
3.34188	2.50056	3.4381	1.6844	3.58147	2008-10-29
2.55315	2.48261	3.39516	2.97004	3.16902	2008-10-30
228.336	96.0285	12.1578	34.4422	13.7789	2008-10-31
2.05068	1.63155	3.09345	1.56256	4.24904	2008-11-01
2.34426	2.08435	2.96408	2.01524	3.54437	2008-11-02
4.14186	563.079	5.50412	2.22924	6.8089	2008-11-03
2.00766	1.81143	2.29167	5.35096	2.69667	2008-11-04
2.53393	3.84099	2.63355	1.85747	3.46242	2008-11-05
2.73739	3.35675	2.65169	31.0297	3.24804	2008-11-06
4.65616	44.6275	9.15341	1.49009	7.32616	2008-11-07
2.47486	2.40417	5.64101	5.7816	8.43759	2008-11-08
1.40715	1.39154	3.15916	6.53787	4.37475	2008-11-09
1.68899	1.63852	1.7082	0.964515	1.83412	2008-11-10
1.2421	1.25818	1.19261	0.587082	1.27177	2008-11-11
2.18328	2.1308	6.6874	4.19473	6.81406	2008-11-12
2.12881	2.04167	4.30252	1.33561	4.0898	2008-11-13
1.59261	1.56301	4.03267	1.76216	6.65508	2008-11-14
1.27561	1.27655	2.2841	2.40422	3.52688	2008-11-15
4.5217	57.9325	4.36809	4.90806	4.48897	2008-11-16
1.71004	1.64455	1.66049	1.40517	1.84872	2008-11-17
0.994983	0.997415	2.02327	2.0202	2.67676	2008-11-18
1.46424	13.7761	1.54734	0.254961	1.64538	2008-11-19
2.43205	145.302	2.79924	7.82263	3.0133	2008-11-20
1.30356	13.0418	1.39809	0.559337	1.54543	2008-11-21
1.51393	1.41952	1.85989	0.981722	1.67642	2008-11-22
4.37176	4.23431	4.51274	0.196501	4.60844	2008-11-23
1.43494	1.3604	2.91922	0.931902	3.27668	2008-11-24
1.22681	1.17403	1.32092	0.420101	1.26184	2008-11-25
0.804757	0.834827	1.4686	0.671524	1.74713	2008-11-26
1.34345	1.26754	1.5282	89.3836	1.67407	2008-11-27
1.67758	5.37357	1.65149	0.878741	2.36982	2008-11-28
1.33649	1.44899	1.40231	0.663813	1.52013	2008-11-29
6.61843	6.60092	8.80132	0.000302882	8.25721	2008-11-30
1.29258	1.25522	1.23529	4.60407	2.15915	2008-12-01
1.67341	42.2037	1.691	5.77245	1.60797	2008-12-02
1.41028	2.53053	1.2503	2.29518	1.82141	2008-12-03
1.44443	4.8759	1.86216	10.4162	1.76824	2008-12-04
1.62768	1.57316	262.115	3.44711	2.68179	2008-12-05
1.2396	1.21512	0.904728	4.95368	1.9832	2008-12-06
0.935046	0.969396	71.0276	0.347918	32.8689	2008-12-07
1.12059	1.11849	1.11035	2.22936	1.64695	2008-12-08
1.06559	1.02786	0.989485	2.64658	1.12028	2008-12-09
0.960929	90.8945	0.945364	12.2666	1.06896	2008-12-10
0.868659	55.2052	0.883111	3.61314	0.926683	2008-12-11
1.08681	1.20464	0.871783	87.4782	0.991875	2008-12-12
1.23988	3.18253	1.28855	5.09859	1.111	2008-12-13
5.84157	69.8859	5.69757	1.17506e-06	5.44955	2008-12-14
0.806172	0.789987	1.08138	6.50264	1.60379	2008-12-15
1.99739	4.99379	2.00243	0.667226	2.42009	2008-12-16
1.13135	1.04325	1.10514	1.92711	1.29573	2008-12-17
0.894577	0.994512	0.910784	1.45073	0.926121	2008-12-18
1.225	6.13917	1.20428	1.61235	1.24817	2008-12-19
0.999603	4.64123	1.09347	28.2252	1.26862	2008-12-20
3.06929	59.9276	2.76091	0.151527	2.51345	2008-12-21
4.51875	4.44116	4.46912	22.1752	4.30542	2008-12-22
3.85438	3.86957	3.62179	0.279639	3.42171	2008-12-23
0.64227	64.302	0.738631	0.301998	1.13591	2008-12-24
45.9304	126.583	45.7388	9.47059e-05	45.5755	2008-12-25
0.576519	0.479651	0.804491	29.3479	1.11915	2008-12-26
0.989519	0.98206	1.02275	8.6922	1.07868	2008-12-27
0.912945	0.694298	0.940315	1.52101	1.62591	2008-12-28
1.12225	1.50003	1.29904	0.439549	1.50515	2008-12-29
2.55503	69.2033	74.9076	0.301747	2.12291	2008-12-30
2.55503	69.2022	74.9127	0.301747	2.12261	2008-12-31
1.47075	8.92373	4.84698	28.1799	4.32711	2009-01-01
1.8006	1.80141	1.83434	0.000228931	1.77216	2009-01-02
0.528487	0.564148	0.542431	3.27605	0.727382	2009-01-03
2.82399	2.8637	2.86619	1.10927	3.35593	2009-01-04
1.46653	1.39858	1.44191	3.46488	2.53667	2009-01-05
3.6256	5.45019	1.88998	6.74589	1.97894	2009-01-06
2.79552	2.5503	3.03666	4.07045	2.97476	2009-01-07
0.923694	1.10745	0.995015	1.35527	1.01838	2009-01-08
1.11213	1.16158	1.11926	1.93844	1.23527	2009-01-09
0.873827	0.900481	0.834071	0.887748	0.872891	2009-01-10
1.0337	1.05911	1.05691	0.306635	1.07043	2009-01-11
2.21172	2.12871	2.23689	0.271039	2.48597	2009-01-12
4.21794	3.85275	64.2032	65.5845	15.6177	2009-01-13
2.57857	4.22635	3.75991	38.5852	4.03933	2009-01-14
45.4108	35.9586	13.3634	66.9727	20.5227	2009-01-15
1.60816	2.69714	2.39955	1.55723	2.60086	2009-01-16
0.612651	0.626066	1.66928	9.71894	1.77276	2009-01-17
190.258	185.622	216.809	19.6549	193.352	2009-01-18
4.19932	5.73775	112.775	15.6722	13.2905	2009-01-19
4.56151	4.3242	7.43944	6.1841	6.9445	2009-01-20
1.68184	1.6603	1.94554	13.5245	2.03879	2009-01-21
3.59651	5.14739	7.43317	2.17152	4.57	2009-01-22
1.30764	1.31459	1.66371	1.6457	1.79154	2009-01-23
6.73334	12.9117	1.48537	1.70429	1.53959	2009-01-24
1.34163	13.5759	1.34229	0.789113	1.37345	2009-01-25
1.19213	1.30291	1.3329	0.944998	1.35676	2009-01-26
2.95101	2.86206	14.6122	2.41689	4.10774	2009-01-27
5.41191	7.26777	91.7058	101.694	171.28	2009-01-28
42.9784	19.8346	174.98	218.708	202.271	2009-01-29
26.2647	27.1616	10.278	93.1987	10.5752	2009-01-30
5.65998	5.67385	14.5487	7.72194	8.18998	2009-01-31
1.39149	1.49477	2.36049	2.01235	1.85092	2009-02-01
1.83196	3.68034	2.16204	1.57284	2.36204	2009-02-02
1.8683	2.01029	2.83751	1.48484	3.55569	2009-02-03
3.38197	3.42861	4.94453	3.19599	5.48418	2009-02-04
2.74762	3.23857	3.97172	2.98637	4.45346	2009-02-05
3.62049	3.36068	17.8256	18.0152	17.8863	2009-02-06
128.982	41.9179	112.923	146.69	71.9033	2009-02-07
122.728	103.15	49.7428	57.1415	55.0545	2009-02-08
3.29185	96.9206	8.76511	2.24602	8.95679	2009-02-09
0.925019	5.21409	7.4105	4.504	7.39618	2009-02-10
1.41229	2.50269	4.57539	3.33988	4.88866	2009-02-11
1.01759	0.983181	3.42761	4.66422	3.67511	2009-02-12
1.28425	1.23868	3.98777	1.76136	4.51206	2009-02-13
6.46806	6.38407	6.58704	1.35329	6.62225	2009-02-14
17.5035	17.6381	148.297	0.541118	148.651	2009-02-15
3.05322	2.40718	2.87534	0.672858	2.97136	2009-02-16
1.21548	1.27208	6.01934	2.95306	6.62296	2009-02-17
1.83792	1.7122	4.3286	0.984358	2.87591	2009-02-18
1.90187	3.38206	4.32854	0.964365	4.65928	2009-02-19
1.84323	44.3374	1.5578	31.2449	2.05501	2009-02-20
2.23709	2.42119	2.44942	2.83958	3.10219	2009-02-21
2.19701	2.227	2.67386	1.04356	2.71799	2009-02-22
1.06178	1.05726	1.42857	6.06995	1.96063	2009-02-23
1.21407	1.24673	1.17929	1.44076	1.25501	2009-02-24
1.21686	1.24967	1.27514	2.82595	1.23486	2009-02-25
2.05485	2.18417	166.662	0.824691	133.773	2009-02-26
1.13176	1.13335	2.53628	6.76983	2.61692	2009-02-27
0.419271	0.438757	0.412259	0.442405	0.549142	2009-02-28
1.51372	2.4449	1.50878	3.94563	1.62123	2009-03-01
0.816636	4.14383	0.850073	1.97408	0.968586	2009-03-02
1.13734	3.8425	1.36912	0.715965	1.10443	2009-03-03
0.741081	2.64181	0.910848	39.787	0.870217	2009-03-04
0.858783	1.16923	1.76233	0.646195	1.82147	2009-03-05
0.853279	0.88909	3.41645	2.07172	3.53051	2009-03-06
1.15451	1.27669	1.15518	0.00679872	1.13837	2009-03-07
0.597502	0.628085	0.590951	0.220041	0.519419	2009-03-08
0.497497	0.590861	0.507741	0.223464	0.496929	2009-03-09
0.866993	0.913032	0.936319	0.544013	0.990922	2009-03-10
0.929906	0.927402	1.99147	1.77484	2.38756	2009-03-11
0.913852	0.890808	1.4417	1.38304	1.71215	2009-03-12
1.44752	1.41744	4.46951	0.981838	4.78773	2009-03-13
0.684615	0.67225	0.860943	13.0537	0.994916	2009-03-14
1.01694	1.02208	1.13266	4.81456	1.09419	2009-03-15
1.01187	4.80578	0.94279	0.802923	1.27128	2009-03-16
3.83103	5.29588	3.45194	3.53833	4.79772	2009-03-17
2.0151	1.96054	1.85403	6.15905	2.55166	2009-03-18
2.76503	2.69469	2.86351	2.31975	3.68619	2009-03-19
3.17602	2.92363	3.16431	142.949	3.97264	2009-03-20
2.09673	1.65521	1.81545	2.11313	2.27942	2009-03-21
1.18182	1.15957	1.17761	2.19974	0.946668	2009-03-22
1.18566	1.15909	1.23527	1.23292	1.36862	2009-03-23
1.90331	1.86522	1.85359	1.9261	2.00612	2009-03-24
1.7436	1.75791	1.83968	2.49609	1.80425	2009-03-25
1.81727	1.82225	1.74949	2.4093	1.58924	2009-03-26
3.01011	3.00626	2.99293	4.38148	3.00039	2009-03-27
2.93964	2.65575	2.91239	0.000157706	3.44899	2009-03-28
3.43542	3.38055	3.56383	0.14494	3.55853	2009-03-29
1.71079	1.33702	1.85483	6.60757	1.65163	2009-03-30
1.63175	1.65001	64.8038	2.06452	1.87527	2009-03-31
3.79113	2.14992	3.09313	77.5755	3.22775	2009-04-01
2.6305	8.1808	2.50127	34.0585	2.39202	2009-04-02
1.84744	2.91905	1.9554	64.7461	2.25524	2009-04-03
1.41756	1.36089	1.47528	4.43228	1.49912	2009-04-04
0.816181	0.779117	0.916056	13.7656	0.9165	2009-04-05
1.37917	1.31674	1.93766	70.6422	2.24845	2009-04-06
1.35801	2.00836	1.73822	92.6393	2.28691	2009-04-07
1.30416	1.26275	1.1066	3.98218	1.48124	2009-04-08
2.02607	1.9444	2.35549	1.46552	2.67845	2009-04-09
1.39328	1.35439	2.45975	5.44313	2.53667	2009-04-10
1.05203	1.02378	1.1243	0.163687	1.11199	2009-04-11
0.405292	0.3934	0.544128	25.0561	0.489126	2009-04-12
1.20495	1.16733	1.25936	7.98004	1.24699	2009-04-13
2.78969	2.31221	2.50781	1.71449	2.78352	2009-04-14
2.11281	2.07908	573.686	48.8368	2.2136	2009-04-15
2.31668	2.04215	1.69311	10.4217	2.19074	2009-04-16
2.80205	2.43177	2.09881	3.08408	2.90304	2009-04-17
1.45236	1.39344	1.78777	8.06231	1.86047	2009-04-18
1.61774	1.51491	2.10493	6.98508	2.36209	2009-04-19
2.07039	1.98849	1.59387	4.80569	2.03659	2009-04-20
5.67476	5.74721	3.37796	5.77755	4.45843	2009-04-21
2.41777	2.2415	2.29017	6.04488	2.603	2009-04-22
1.72476	1.6852	1.73846	6.19859	1.88299	2009-04-23
1.74035	1.45974	2.2376	6.93911	2.25158	2009-04-24
1.61985	1.65284	1.65066	37.7964	1.96597	2009-04-25
3.85852	3.76662	3.9743	26.4252	3.88544	2009-04-26
4.23544	4.24413	3.83502	45.906	3.78861	2009-04-27
3.48798	3.56038	3.87121	32.3945	4.02082	2009-04-28
2.57291	9.38995	2.70041	34.812	2.75757	2009-04-29
2.64397	5.09276	2.22099	29.5335	2.55987	2009-04-30
2.19999	2.06966	1.69963	31.9498	2.03869	2009-05-01
1.45662	1.38463	1.28236	6.29165	1.39474	2009-05-02
1.64611	1.59691	1.41657	7.83839	1.4772	2009-05-03
1.39829	1.27139	2.12489	1.74121	2.99164	2009-05-04
1.31055	1.29039	2.4016	3.58624	3.48522	2009-05-05
1.51972	1.52617	2.17252	31.0645	3.0129	2009-05-06
1.50036	1.44113	1.29172	1.42627	1.42661	2009-05-07
1.25344	1.1807	0.873652	2.10047	0.930758	2009-05-08
1.25222	1.18716	1.40627	9.85828	1.87119	2009-05-09
1.41529	1.36035	1.43716	23.2089	2.64497	2009-05-10
1.69033	1.67172	1.06507	18.6858	1.87186	2009-05-11
1.04936	0.863677	0.889572	3.90503	1.67363	2009-05-12
1.78513	1.64305	3.10215	105.536	3.90972	2009-05-13
1.66548	1.60146	2.13803	87.9026	2.00412	2009-05-14
2.12882	2.05469	574.745	172.623	2.34477	2009-05-15
1.92167	2.02537	3.13452	37.2676	3.59509	2009-05-16
1.75938	1.64416	1.76264	205.837	3.2672	2009-05-17
3.41877	3.23875	2.64215	50.5703	3.63591	2009-05-18
1.6845	1.62208	1.25695	37.3475	2.91345	2009-05-19
1.34362	1.28846	1.75446	95.924	4.00731	2009-05-20
1.37703	1.32126	1.63685	145.081	2.52381	2009-05-21
2.19905	2.13288	1.97314	36.8649	3.41397	2009-05-22
0.968324	0.925091	0.759518	50.8207	1.01163	2009-05-23
1.62814	1.57263	1.67037	29.0929	2.44868	2009-05-24
1.63541	1.38484	1.50326	4.96537	3.19326	2009-05-25
1.08812	0.983991	0.99543	100.838	2.99438	2009-05-26
2.27011	1.44972	2.23478	103.754	2.90497	2009-05-27
2.95096	1.93427	7.26942	41.6636	5.73075	2009-05-28
9.89445	3.64251	18.9162	83.8517	19.6521	2009-05-29
2.61984	5.37368	2.82583	5.49783	2.68299	2009-05-30
2.50555	2.36076	2.35565	82.7645	2.44393	2009-05-31
10.6514	3.53974	10.6603	64.4383	6.95563	2009-06-01
7.64261	4.82426	14.1889	154.959	39.7758	2009-06-02
1.06921	5.1856	1.02935	0.852072	1.43771	2009-06-03
2.38119	1.81772	2.40272	69.9401	4.29081	2009-06-04
0.574809	1.75155	0.530588	26.529	3.44786	2009-06-05
0.842318	0.727309	0.86021	53.0357	0.938858	2009-06-06
1.43571	1.4109	1.54204	27.1519	1.9176	2009-06-07
1.5041	1.49338	1.50476	6.8622	1.42758	2009-06-08
1.67605	1.56083	21.3452	34.9808	2.13793	2009-06-09
4.24071	4.17654	4.56013	224.423	5.27238	2009-06-10
70.5616	70.3017	15.9074	406.592	20.4385	2009-06-11
2.33603	5.41464	1.98473	230.805	2.4937	2009-06-12
0.899986	0.807521	0.857962	8.12952	1.78466	2009-06-13
1.75253	1.58051	1.72701	39.5674	5.49622	2009-06-14
2.20364	2.12591	1.9136	161.555	2.06517	2009-06-15
2.96304	5.70408	2.89715	235.984	4.23038	2009-06-16
1.19158	275.808	1.00385	16.1375	2.19377	2009-06-17
2.87049	2.73936	4.40092	21.129	4.89034	2009-06-18
1.59204	1.44403	1.69903	161.122	2.19134	2009-06-19
0.679935	0.576143	0.974999	2.42731	0.844369	2009-06-20
1.12623	1.17131	1.00999	0.928688	1.33615	2009-06-21
1.57382	1.09711	1.84957	30.7219	2.03432	2009-06-22
1.24962	1.14554	1.86057	14.2917	2.05348	2009-06-23
0.573707	0.513078	0.682138	19.6014	0.872282	2009-06-24
1.63666	1.64739	1.50961	18.8277	2.18299	2009-06-25
0.986609	0.881904	0.843828	7.6761	1.1319	2009-06-26
1.10998	1.10071	1.09965	7.54667	1.54599	2009-06-27
2.3058	2.38488	2.24804	60.7088	2.69087	2009-06-28
1.43724	1.27733	2.38494	29.6766	2.63763	2009-06-29
1.86089	1.798	400.306	113.096	2.71408	2009-06-30
2.206	2.12693	280.141	48.977	3.28604	2009-07-01
15.3328	32.8389	8.16533	24.6149	8.49012	2009-07-02
1.69545	1.59252	2.03643	13.2628	1.77759	2009-07-03
0.866647	0.854385	1.08958	29.3978	1.0378	2009-07-04
1.80676	1.76461	1.67791	13.8992	1.77058	2009-07-05
21.7153	35.6101	2.56544	3.81569	4.97094	2009-07-06
4.53287	2.97818	2.81951	4.60387	3.78226	2009-07-07
2.85681	1.72484	1.85407	21.2369	2.87469	2009-07-08
1.6318	1.49318	1.47447	8.35504	1.62291	2009-07-09
1.71864	1.48932	2.28804	4.77201	1.86505	2009-07-10
4.96955	4.96998	488.738	68.3725	6.51848	2009-07-11
1.44159	1.38706	1.7556	2.93928	1.82689	2009-07-12
2.15094	2.04111	2.1099	7.34706	2.15051	2009-07-13
1.96625	1.81	2.21855	8.56782	2.37674	2009-07-14
2.11428	1.99438	2.05244	3.23636	2.183	2009-07-15
4.4387	4.76485	3.27016	4.81264	3.56564	2009-07-16
1.51939	1.66432	1.4237	2.02186	1.67272	2009-07-17
1.30063	1.21239	1.14711	11.4769	2.08436	2009-07-18
1.68011	1.59852	2.1503	3.85598	2.08105	2009-07-19
1.34134	1.33139	1.91598	3.49865	1.45323	2009-07-20
1.06338	1.03878	10.0315	4.35809	0.874359	2009-07-21
1.00786	0.973382	1.40981	1.95512	1.43996	2009-07-22
1.86756	2.28588	4.94543	3.85088	6.06127	2009-07-23
1.15139	1.11785	1.39866	2.48152	1.58777	2009-07-24
1.31383	1.10112	1.38281	3.2035	1.45474	2009-07-25
1.37149	1.33858	1.79238	12.9408	1.38729	2009-07-26
1.92359	1.62738	2.13274	2.78679	2.55286	2009-07-27
3.3979	3.38829	3.00396	2.89055	2.25837	2009-07-28
1.75412	1.76202	1.84235	1.85805	1.63683	2009-07-29
1.78996	14.4164	2.6235	4.1759	2.26163	2009-07-30
1.07109	4.87828	2.02363	2.31239	1.29154	2009-07-31
0.873629	0.855393	0.974372	1.46064	0.754706	2009-08-01
1.04201	0.976819	551.847	2.92032	1.66342	2009-08-02
2.03135	1.88421	2.64975	36.8617	2.22359	2009-08-03
2.29287	2.02438	2.1688	20.9227	1.88866	2009-08-04
1.10871	1.01754	0.993951	2.03111	1.06833	2009-08-05
0.956546	0.832852	138.135	15.0864	1.73049	2009-08-06
1.16134	1.0259	476.588	78.9704	3.54336	2009-08-07
1.23068	1.10034	1.49608	1.71505	1.17829	2009-08-08
1.52141	1.44878	1.69434	1.9165	2.91696	2009-08-09
1.62166	1.46376	2.21166	2.72417	1.64005	2009-08-10
1.39572	1.25165	1.36402	1.29904	1.3687	2009-08-11
1.55149	1.31324	1.29609	1.31423	1.49748	2009-08-12
1.55653	1.4302	1.41659	11.4312	1.83975	2009-08-13
1.22908	1.05111	2.03145	6.57353	1.82714	2009-08-14
3.58558	3.52448	6.13514	17.0622	4.00941	2009-08-15
3.79638	3.69576	90.5929	29.2565	9.37168	2009-08-16
2.89891	2.82287	3.12214	7.03002	2.92794	2009-08-17
2.41894	149.787	2.07007	2.29008	2.4874	2009-08-18
5.98713	27.9878	174.817	5.65665	5.5937	2009-08-19
2.5899	294.686	1.75649	2.76613	1.94253	2009-08-20
7.71173	7.80208	520.583	16.6486	9.56814	2009-08-21
1.3565	1.12231	1.38336	1.43871	1.39401	2009-08-22
1.68374	1.66438	1.85122	1.8414	1.72159	2009-08-23
11.026	8.95596	9.46335	8.11735	10.3086	2009-08-24
2.87354	6.84016	2.68069	4.65996	2.42785	2009-08-25
1.23651	3.07204	1.36708	56.1951	1.20748	2009-08-26
1.73427	7.99794	1.74941	1.98986	1.74907	2009-08-27
1.41028	1.30745	1.44867	2.31666	1.48566	2009-08-28
1.65011	1.51422	2.03605	1.78141	1.63942	2009-08-29
0.860116	0.848482	384.069	70.9452	2.40376	2009-08-30
0.699183	0.689586	356.571	20.9182	3.33847	2009-08-31
0.727675	0.601061	1.26679	1.74219	1.08883	2009-09-01
0.333191	0.318884	123.9	12.7586	125.554	2009-09-02
0.368726	0.322835	7.33183	80.1208	7.20198	2009-09-03
0.521153	0.471525	6.49599	7.10011	6.54174	2009-09-04
0.645908	0.538933	34.2338	42.6822	2.27577	2009-09-05
0.50788	0.50935	196.168	6.4662	2.28513	2009-09-06
11.1064	10.8189	4.41038	12.949	11.2183	2009-09-07
2.9949	1.72687	3.57271	6.07363	3.23248	2009-09-08
3.43713	3.40976	3.57696	3.5294	3.7575	2009-09-09
0.351351	0.330303	2.99015	3.6047	0.864795	2009-09-10
0.311797	0.262854	218.326	49.6882	1.86729	2009-09-11
0.16194	0.185703	429.393	48.1211	258.617	2009-09-12
0.625304	3.10098	263.541	4.07578	231.925	2009-09-13
0.812083	0.717205	1.61981	1.63095	0.775414	2009-09-14
0.88745	0.694882	1.09254	1.85007	0.97885	2009-09-15
0.455689	0.401446	0.563639	2.5533	0.461909	2009-09-16
2.60319	3.01878	2.62592	3.50041	2.60138	2009-09-17
1.75559	1.59577	1.68913	2.35832	1.84599	2009-09-18
0.66599	0.620621	1.13917	1.4658	1.12321	2009-09-19
0.737632	0.704365	0.699372	0.754113	1.09083	2009-09-20
0.948051	0.865264	0.786875	3.16805	1.52864	2009-09-21
3.39664	2.28792	3.43527	4.28704	3.37243	2009-09-22
1.3102	1.49623	1.41211	3.95665	1.32933	2009-09-23
0.866144	0.820055	1.10194	2.11594	0.814415	2009-09-24
0.660289	0.623576	1.53696	1.20682	1.17122	2009-09-25
0.736246	0.725005	0.654501	0.775105	0.763459	2009-09-26
1.65384	1.57831	2.11889	2.37013	1.84627	2009-09-27
1.67924	1.64102	1.98035	2.25802	2.68172	2009-09-28
0.826983	0.73964	0.867123	0.851223	1.5146	2009-09-29
0.720895	0.717065	1.29758	9.64785	1.13229	2009-09-30
1.64816	1.66016	2.46573	2.87515	1.90144	2009-10-01
2.90322	2.87475	2.91767	1.76613	2.92108	2009-10-02
1.58786	1.53858	2.65939	3.74795	2.71037	2009-10-03
0.854022	0.826897	0.888361	75.5509	2.2025	2009-10-04
1.53643	1.49943	1.31187	130.291	1.52313	2009-10-05
11.8862	11.8634	11.2591	39.3863	11.7577	2009-10-06
4.4449	4.41497	4.14323	6.12726	5.66278	2009-10-07
3.02919	2.68261	2.87591	11.0768	3.74349	2009-10-08
5.53874	5.0015	5.25304	5.9281	6.08134	2009-10-09
0.674743	0.61557	0.674697	33.8445	1.12523	2009-10-10
0.674054	0.622441	1.078	95.0862	3.97523	2009-10-11
3.59777	1.7605	2.4766	19.8676	3.83203	2009-10-12
0.999264	0.948381	1.03513	3.23519	1.34883	2009-10-13
2.42848	2.36323	1.49516	38.1694	2.60342	2009-10-14
1.10613	1.08698	1.12625	1.36472	1.23761	2009-10-15
5.47875	4.58798	5.22732	3.5443	5.89764	2009-10-16
0.691721	0.707632	0.578395	1.66408	0.623424	2009-10-17
0.129748	0.127006	0.186411	0.994465	0.278336	2009-10-18
0.855585	0.827836	1.32254	0.824531	1.35393	2009-10-19
4.99914	4.81975	7.21394	4.55014	7.53885	2009-10-20
6.50333	5.01627	5.43858	4.51577	4.87688	2009-10-21
3.5725	0.869542	3.51936	2.86636	3.52978	2009-10-22
1.64427	1.63303	1.28853	0.451684	1.32194	2009-10-23
1.26478	1.26115	1.20004	0.363808	1.18485	2009-10-24
1.28425	1.30126	1.22443	0.163724	1.11842	2009-10-25
1.74231	1.69906	1.73873	0.517579	1.71401	2009-10-26
3.26003	1.4428	2.55537	2.10012	2.9513	2009-10-27
1.67922	1.11498	1.18301	2.22283	1.35382	2009-10-28
2.06027	1.61683	77.9983	2.39158	1.99867	2009-10-29
6.97818	6.24699	6.49928	56.7505	6.62234	2009-10-30
2.46227	2.50772	2.27975	0.989659	2.49457	2009-10-31
1.07977	5.10967	1.10289	0.257138	1.27336	2009-11-01
4.31988	4.35827	80.8773	1.757	4.18771	2009-11-02
51.3986	52.8771	29.4601	10.5017	13.0615	2009-11-03
0.753213	0.792037	1.4986	1.41013	1.45505	2009-11-04
0.589716	0.691104	1.47725	10.9717	1.51668	2009-11-05
0.509021	0.538417	0.7173	0.42404	0.753392	2009-11-06
0.911351	0.878037	0.792561	0.197061	1.1347	2009-11-07
0.688505	0.595244	2.61558	2.21752	2.61454	2009-11-08
8.4446	7.3934	158.595	4.76224	4.77855	2009-11-09
8.03984	7.65113	29.2405	25.9755	4.46608	2009-11-10
4.5758	4.8164	44.9167	12.5577	3.78785	2009-11-11
2.29249	2.37407	58.782	16.0154	2.27596	2009-11-12
2.86106	2.1851	43.6318	6.01843	2.40555	2009-11-13
1.29527	1.2804	2.23972	1.40743	1.34822	2009-11-14
1.62311	1.64228	29.0122	6.2735	1.82203	2009-11-15
7.07854	6.77325	3.71421	13.438	9.14481	2009-11-16
0.805486	10.4286	0.952402	3.91405	0.851737	2009-11-17
1.56521	1.58902	1.17868	1.41606	1.18825	2009-11-18
85.9408	117.895	249.436	8.62312	122.465	2009-11-19
155.163	181.175	14.4903	11.4136	14.1587	2009-11-20
2.26705	8.40418	4.69806	11.839	5.10467	2009-11-21
7.25942	9.44811	245.876	4.81241	2.61454	2009-11-22
0.985439	6.76521	0.886562	0.443748	0.839701	2009-11-23
0.694956	0.742015	0.632447	0.454788	0.670633	2009-11-24
2.33393	2.30823	1.85616	2.25808	1.88943	2009-11-25
76.0321	75.2804	27.1223	6.32165	27.5458	2009-11-26
145.788	124.039	12.9657	8.4979	32.0491	2009-11-27
4.62042	4.42441	19.6082	8.74263	9.18058	2009-11-28
2.27629	4.77037	2.38533	3.49957	2.66899	2009-11-29
1.06177	2.21072	1.08629	9.79543	1.11879	2009-11-30
0.405374	0.4061	0.561161	6.69979	0.639511	2009-12-01
0.686606	0.592772	0.606239	11.9415	0.612746	2009-12-02
0.685747	2.41551	274.911	0.28471	0.652084	2009-12-03
0.673366	7.202	0.715482	0.389012	0.899134	2009-12-04
1.53132	1.59626	1.58307	0.375768	1.55768	2009-12-05
1.33313	1.35842	1.3077	0.396176	1.2974	2009-12-06
204.984	24.4685	7.6243	35.3656	7.92467	2009-12-07
285.978	63.923	8.30431	18.8849	8.46335	2009-12-08
0.553793	8.31972	0.553911	6.78424	0.680151	2009-12-09
0.803857	14.6536	2.17239	22.1466	1.07419	2009-12-10
0.823704	7.39661	1.01569	11.9995	0.873122	2009-12-11
1.35808	1.36977	1.38058	8.20014	1.32697	2009-12-12
2.22061	2.58676	2.14522	4.75403	2.30879	2009-12-13
1.04513	1.19323	1.01949	10.5476	1.0391	2009-12-14
1.08899	1.31933	27.5841	11.3066	0.936409	2009-12-15
80.275	21.7175	19.7353	2.09804	22.8811	2009-12-16
69.3133	68.7892	7.20275	4.51377	10.0701	2009-12-17
0.904128	0.765256	1.36219	7.11948	0.664397	2009-12-18
1.14826	1.76255	1.54582	13.0841	1.28015	2009-12-19
1.26722	1.27352	1.47619	0.420069	1.85843	2009-12-20
2.32775	2.21976	2.63027	12.1729	2.67965	2009-12-21
1.92719	1.48412	4.49447	11.9026	1.40199	2009-12-22
3.93088	2.67662	4.03462	2.10612	1.6385	2009-12-23
4.0751	1.93678	4.95965	43.6552	6.23079	2009-12-24
1.12467	1.91997	1.5132	2.85167	0.966888	2009-12-25
4.62789	63.1262	3.67409	1.17848	3.37478	2009-12-26
3.423	3.38842	3.49032	0.832072	3.64455	2009-12-27
0.702576	0.733203	0.795234	0.966326	1.34981	2009-12-28
1.75475	1.78258	2.02863	1.28642	1.82172	2009-12-29
1.31609	1.31487	3.33852	3.16976	1.848	2009-12-30
1.69841	1.64599	2.7447	20.8282	2.29489	2009-12-31
1.60586	1.7182	1.90228	2.46659	1.63527	2010-01-01
1.63829	1.73297	35.8452	19.8575	3.01386	2010-01-02
0.438614	1.52424	0.515043	1.57408	0.445678	2010-01-03
2.5293	2.74867	2.36891	0.287759	2.46964	2010-01-04
0.587224	0.616279	0.616365	0.328478	0.61516	2010-01-05
0.78881	0.858943	0.788696	4.86487	0.791362	2010-01-06
1.07031	1.08691	1.06967	7.46706	1.09667	2010-01-07
2.10687	2.17105	45.9529	6.45729	2.08545	2010-01-08
3.58467	7.56675	9.36401	32.8308	3.68354	2010-01-09
3.42661	8.18545	104.034	11.1231	22.3081	2010-01-10
2.95534	2.14733	90.0073	5.20469	70.2197	2010-01-11
29.2429	7.21407	96.0957	3.91444	7.51691	2010-01-12
1.17119	1.47858	1.48549	5.5324	0.999672	2010-01-13
1.01947	3.19607	1.2841	0.294667	1.1422	2010-01-14
0.848319	0.901306	138.131	0.599529	0.914748	2010-01-15
0.717509	0.702445	1.1251	1.63488	0.770677	2010-01-16
3.6597	3.72799	5.99912	12.5519	5.87875	2010-01-17
3.87343	170.977	3.84007	0.113274	3.78487	2010-01-18
1.45747	2.8711	1.51522	0.0543709	1.45712	2010-01-19
0.891619	1.36823	0.919672	0.319557	0.852527	2010-01-20
53.2052	43.9102	27.8078	6.98898	12.7599	2010-01-21
198.657	20.4679	6.73845	7.17685	7.52662	2010-01-22
79.8414	5.90892	250.766	0.951699	250.063	2010-01-23
0.899053	4.7173	1.33736	0.213099	1.03439	2010-01-24
0.939252	5.40637	0.909559	1.12238	0.947168	2010-01-25
0.703053	2.33455	1.15225	0.56449	1.6054	2010-01-26
0.940884	4.68355	1.44067	0.850441	1.07317	2010-01-27
1.04331	4.90384	1.09034	0.97014	1.04676	2010-01-28
0.582808	1.19704	0.857004	0.300388	0.577694	2010-01-29
1.48457	1.95817	161.993	0.350047	1.31059	2010-01-30
1.51567	1.53869	143.713	4.38672	1.58168	2010-01-31
1.38559	1.34909	1.44512	0.52425	1.30964	2010-02-01
3.53547	3.22546	97.1653	3.30135	98.0966	2010-02-02
4.67206	4.42305	93.2117	4.57479	94.4115	2010-02-03
82.6416	12.9746	8.82171	6.80876	9.00058	2010-02-04
4.58493	21.0874	3.60624	0.996992	3.55572	2010-02-05
0.664093	0.671538	0.712687	0.132084	0.716323	2010-02-06
7.12751	7.0343	7.12719	0.643158	7.1382	2010-02-07
10.2545	9.97101	144.997	8.5018	81.4129	2010-02-08
9.55979	9.22474	77.9957	10.7478	192.428	2010-02-09
8.90254	8.17457	63.3995	22.9655	141.321	2010-02-10
65.8522	10.9561	2.84541	4.6733	3.94768	2010-02-11
108.174	9.00346	3.26382	10.0445	3.62665	2010-02-12
1.43341	1.37483	1.23393	0.580022	1.42956	2010-02-13
0.814178	0.848794	0.809975	0.463356	0.826999	2010-02-14
1.13624	223.873	0.710808	0.837684	0.75911	2010-02-15
1.29435	1.47941	1.27787	0.389895	1.29418	2010-02-16
1.11196	82.336	1.10546	0.277557	1.22473	2010-02-17
4.06766	4.72512	4.04703	0.933321	4.08212	2010-02-18
2.69894	8.42455	8.40024	6.87663	8.95688	2010-02-19
3.277	28.0015	12.4593	9.2841	12.1224	2010-02-20
3.43734	3.66044	3.35164	1.5681	3.45183	2010-02-21
79.9119	18.5801	3.85132	4.58671	7.09693	2010-02-22
1.99896	75.2259	1.85944	6.09062	1.97013	2010-02-23
0.255619	0.252779	0.398464	0.350993	0.413773	2010-02-24
1.33822	1.36468	1.88811	1.51827	1.85605	2010-02-25
0.701115	0.672721	10.8021	3.9676	4.44079	2010-02-26
2.09445	2.09076	2.13212	3.44234	2.16205	2010-02-27
4.07092	4.37409	17.0677	0.854464	4.06085	2010-02-28
1.66658	1.6305	28.8278	11.5502	1.77939	2010-03-01
5.46693	4.83597	5.83831	1.07279	5.61859	2010-03-02
3.32608	3.35901	3.25858	0.95206	3.26796	2010-03-03
1.97803	2.13996	2.04857	0.986335	2.14786	2010-03-04
0.919947	0.817368	1.44084	1.32529	1.47618	2010-03-05
1.3294	2.33838	1.3082	0.177494	1.34663	2010-03-06
1.65634	67.1096	1.64927	0.431573	1.65558	2010-03-07
3.26266	40.3438	4.4512	3.26835	3.61406	2010-03-08
32.3418	60.903	4.95944	4.54641	4.78884	2010-03-09
0.515716	65.4047	0.586187	0.053541	0.550101	2010-03-10
3.63432	3.62792	3.71493	0.0583339	3.75258	2010-03-11
11.4951	18.5961	11.8634	0.119352	11.5932	2010-03-12
1.49626	12.2408	1.57741	0.0730083	1.72601	2010-03-13
2.54565	4.45168	2.41252	2.23833	2.13595	2010-03-14
2.45114	5.50181	2.97934	5.79484	2.93536	2010-03-15
1.89909	15.3143	1.95664	2.23561	2.34377	2010-03-16
1.06342	15.2161	1.93836	4.55845	1.43655	2010-03-17
1.14336	1.17454	7.39997	6.21329	1.87856	2010-03-18
1.2314	1.14591	1.33395	1.55208	1.59395	2010-03-19
0.773392	0.287702	0.826565	0.460121	2.97523	2010-03-20
0.879412	9.93184	2.05303	0.611428	1.02932	2010-03-21
1.07674	1.07632	1.10621	0.415673	1.52572	2010-03-22
1.07654	5.03295	1.33004	13.264	1.58079	2010-03-23
0.561746	73.5555	0.616021	0.354374	0.986674	2010-03-24
1.19326	1.38861	15.7096	1.6414	1.7967	2010-03-25
74.2262	135.965	111.616	1.19938	4.67558	2010-03-26
0.791538	0.750743	0.842629	0.231423	1.87567	2010-03-27
2.06671	2.08009	1.43602	0.771659	1.71944	2010-03-28
2.19353	2.28004	2.64265	1.14034	5.43896	2010-03-29
0.685915	3.74817	10.0278	0.59225	5.58132	2010-03-30
0.394264	0.476796	0.725754	0.699641	0.869905	2010-03-31
0.385018	1.98169	1.14505	0.0693618	0.599156	2010-04-01
0.232157	0.316935	0.272333	0.502021	0.270464	2010-04-02
1.75055	2.05296	1.72279	40.5712	1.74393	2010-04-03
1.82366	2.03458	2.03892	6.64939	1.8779	2010-04-04
1.66015	79.3771	1.70384	0.724353	1.69464	2010-04-05
2.05807	2.99508	2.65196	1.31199	2.7052	2010-04-06
1.41291	3.72078	1.36774	0.317616	1.38565	2010-04-07
0.827994	2.57647	0.924766	1.37474	0.898829	2010-04-08
0.950014	0.93595	0.924526	9.4828	0.955827	2010-04-09
1.08253	1.10826	1.04693	0.645895	1.03824	2010-04-10
1.59359	6.62389	2.00491	0.79797	1.50434	2010-04-11
0.572808	0.585097	0.788109	0.926316	0.682717	2010-04-12
48.1919	82.0795	7.19567	22.3106	8.87424	2010-04-13
1.94884	1.93063	3.24897	11.9611	3.86082	2010-04-14
0.509188	0.610934	18.2187	14.3054	15.2488	2010-04-15
0.573047	1887.62	2.50414	2.11082	3.46043	2010-04-16
0.97703	0.958072	26.9124	8.21906	1.02616	2010-04-17
1.47918	1.50859	1.53082	8.90713e-06	1.47533	2010-04-18
1.58197	1.64701	1.47586	3.64652	2.80589	2010-04-19
1.73042	1.79569	37.6174	0.111815	44.3035	2010-04-20
1.69713	1.7213	254.054	0.0733635	136.362	2010-04-21
1.73215	1.93632	575.19	0.0724539	183.926	2010-04-22
0.579789	0.608573	101.082	0.072715	0.582616	2010-04-23
1.08488	1.08636	1.05916	5.79179e-05	1.11399	2010-04-24
1.14719	2.33789	1.27907	0.0389209	1.28813	2010-04-25
1.35546	1.36289	1.35643	0.964801	1.35894	2010-04-26
2.72156	9.18518	17.0155	17.5368	6.76314	2010-04-27
0.491481	0.53354	1.85389	10.1537	2.49739	2010-04-28
2.43825	2.67463	2.4436	4.96955	2.76719	2010-04-29
1.38919	2.01918	1.34586	1.96652	1.50537	2010-04-30
1.00936	1.18985	1.07743	6.40315	1.07211	2010-05-01
1.22602	3.77795	1.27934	41.4553	1.28532	2010-05-02
0.504905	0.539764	0.568088	8.90258	0.610606	2010-05-03
0.730025	0.547973	0.971132	30.4555	1.50988	2010-05-04
1.36159	4.40683	1.47327	3.96244	1.50498	2010-05-05
0.77599	6.66493	0.837437	6.84406	0.808738	2010-05-06
2.19547	5.90717	2.16797	10.2011	2.24419	2010-05-07
0.870883	8.41623	0.903901	28.0424	1.14418	2010-05-08
0.909352	1.54807	0.841408	23.3474	1.08537	2010-05-09
2.44959	2.3421	2.57178	12.8884	3.13613	2010-05-10
3.62996	11.8912	3.58448	10.1664	3.68636	2010-05-11
11.4466	11.8898	16.4379	27.7738	16.7941	2010-05-12
8.34396	722.996	9.13575	30.325	12.1951	2010-05-13
13.1297	22.888	13.6982	88.1254	15.82	2010-05-14
2.38277	23.4216	2.71335	169.954	2.38342	2010-05-15
3.2531	12.4959	3.15075	59.173	4.27469	2010-05-16
5.72923	19.8414	7.79961	53.1044	8.3171	2010-05-17
9.12062	10.6736	7.17423	16.3324	12.9683	2010-05-18
5.85117	23.0437	2.9175	20.0376	9.3074	2010-05-19
2.98234	122.031	2.07758	43.8278	6.02759	2010-05-20
4.02711	16.9	2.94829	13.1533	3.09046	2010-05-21
3.73865	117.686	4.36089	152.607	4.79243	2010-05-22
2.61422	23.4421	107.124	112.342	2.57335	2010-05-23
2.86345	11.4587	4.84687	17.7769	5.31533	2010-05-24
3.63869	27.6562	4.07556	4.3559	4.42211	2010-05-25
1.77829	21.604	1.59789	130.526	1.80489	2010-05-26
1.77294	41.4073	1.65471	19.7755	1.76799	2010-05-27
1.82035	16.3084	1.80908	16.7985	1.86356	2010-05-28
1.72799	2.64927	1.7169	1.45153	1.76906	2010-05-29
1.32102	1.4095	1.3998	0.601446	1.2611	2010-05-30
1.65599	1.71248	1.45407	1.32096	1.68198	2010-05-31
2.9157	267.865	2.97072	3.68059	3.16911	2010-06-01
2.00221	653.959	2.11209	1.53636	2.32491	2010-06-02
2.40157	2.17706	2.02486	2.11643	2.23052	2010-06-03
5.10029	6.94674	6.40222	5.66758	6.52088	2010-06-04
12.6315	23.9296	12.1832	11.3834	12.2557	2010-06-05
4.05836	301.021	3.93137	5.3768	5.91848	2010-06-06
8.45419	8.8649	7.37231	7.03203	8.57621	2010-06-07
2.33023	3.60878	1.86316	1.85335	2.24395	2010-06-08
1.07644	1.04798	0.930067	0.768201	1.01865	2010-06-09
2.05616	2.69112	1.72745	2.13563	2.20866	2010-06-10
0.917249	0.909569	0.657019	2.9858	0.866613	2010-06-11
3.23262	2.59931	6.13157	6.77545	11.7508	2010-06-12
1.55728	1.51772	1.55161	11.9697	3.63355	2010-06-13
3.11835	202.067	4.06589	16.0729	7.0114	2010-06-14
2.8657	6.73069	16.5746	2.46023	4.65076	2010-06-15
0.936236	6.2117	0.912524	9.77292	1.56572	2010-06-16
1.09907	1.44364	1.31336	29.803	1.37649	2010-06-17
0.953296	2.06232	1.03776	12.7511	2.52263	2010-06-18
1.518	5.6255	1.73028	19.6645	3.17031	2010-06-19
1.09786	5.61973	1.1131	22.2764	3.6631	2010-06-20
2.62337	3.18981	35.3378	58.1812	38.129	2010-06-21
1.7722	3.93972	1.4156	6.41341	1.78297	2010-06-22
2.19689	2.36831	2.07935	10.3484	2.21339	2010-06-23
1.41173	1.40522	1.33602	22.352	1.43314	2010-06-24
1.6907	1.29553	1.73209	2.15486	1.70144	2010-06-25
1.81951	3.06993	1.64667	38.6166	2.04321	2010-06-26
1.60765	4.09274	1.51778	3.23573	1.60971	2010-06-27
4.06245	2.29247	2.25878	12.6621	2.35266	2010-06-28
32.393	6.96251	5.37524	2.85918	4.82539	2010-06-29
2.67236	2.77279	10.3104	6.46581	2.9771	2010-06-30
3.59563	4.46651	3.17096	3.30545	4.40762	2010-07-01
4.43352	5.90781	3.00236	1.93648	4.17738	2010-07-02
1.87574	3.88706	1.9239	1.29351	4.00791	2010-07-03
1.0006	1.09944	1.00357	1.51914	3.02538	2010-07-04
1.51246	4.58197	1.49063	1.27909	1.72487	2010-07-05
0.573742	9.70988	0.470728	0.414471	1.07017	2010-07-06
1.07799	7.23171	0.849609	4.61421	2.91918	2010-07-07
1.18232	4.43806	0.587771	1.25043	1.97269	2010-07-08
1.30542	9.64702	1.37656	0.786111	3.35301	2010-07-09
1.05945	9.12874	5.85693	0.268015	2.06737	2010-07-10
2.29922	2.34825	2.36907	2.7099	2.53846	2010-07-11
0.817855	2.22409	1.26396	2.4133	1.30794	2010-07-12
1.40401	2.29511	2.64927	13.1334	2.02344	2010-07-13
4.30953	4.75007	10.2071	8.98827	5.08414	2010-07-14
0.941658	1.90518	1.09102	1.06385	1.02689	2010-07-15
0.334085	1.01039	0.32473	2.4016	2.09197	2010-07-16
0.585639	2.95757	1.24934	2.90585	1.28074	2010-07-17
1.93532	2.1858	2.18995	10.762	2.97948	2010-07-18
2.23565	2.61208	2.23202	2.52411	3.05796	2010-07-19
3.84645	3.78773	3.3254	5.82433	3.77083	2010-07-20
4.28037	9.66751	3.51837	8.46793	4.29003	2010-07-21
6.04119	12.5896	5.58703	6.23764	6.49945	2010-07-22
4.02886	6.52265	3.65947	2.45646	4.00988	2010-07-23
1.16862	2.72553	1.09294	1.65536	1.15435	2010-07-24
0.83493	6.62785	0.840789	1.23357	0.869779	2010-07-25
1.84398	4.76503	1.67039	2.04513	2.08426	2010-07-26
1.45944	5.75187	1.32515	1.51399	2.3717	2010-07-27
1.12174	9.92993	0.910878	74.7437	1.11602	2010-07-28
2.80946	14.3197	2.7244	3.63982	5.28697	2010-07-29
1.41086	8.74116	1.24203	1.51717	2.77772	2010-07-30
1.45631	4.72868	2.5378	1.8048	2.02482	2010-07-31
3.18647	6.27638	3.70557	2.73143	3.25841	2010-08-01
5.42507	4.73868	4.62996	4.26739	5.01369	2010-08-02
0.884527	2.83038	0.792625	0.874311	0.930226	2010-08-03
1.17918	3.51399	1.89818	0.901295	1.23077	2010-08-04
3.15317	2.86526	3.03972	4.34633	3.28451	2010-08-05
7.68538	9.71385	6.87419	11.8753	7.33558	2010-08-06
3.97559	17.3123	3.18712	138.387	3.8762	2010-08-07
3.82658	209.046	4.1842	139.517	3.85327	2010-08-08
4.21052	108.794	3.79669	4.18089	4.28406	2010-08-09
53.2498	29.6641	3.45646	3.97031	4.64111	2010-08-10
1.83465	116.293	3.34922	3.13398	2.1507	2010-08-11
5.13242	94.3975	5.28556	5.92043	5.08512	2010-08-12
0.812506	15.0826	0.844686	4.60873	0.798598	2010-08-13
1.79092	24.773	3.72361	7.67215	2.55737	2010-08-14
2.09571	2.73407	13.6164	7.95726	2.02854	2010-08-15
1.0675	1.04216	1.93001	1.29723	1.15531	2010-08-16
0.912613	3.45342	0.833641	0.957324	0.930448	2010-08-17
1.0811	1.3788	4.71644	13.7755	1.18847	2010-08-18
0.880564	1.70478	1.51982	8.18111	1.30427	2010-08-19
1.11831	5.32478	2.44813	0.488602	0.870719	2010-08-20
0.199878	0.207919	1.99938	2.02244	1.92744	2010-08-21
0.533056	0.483073	1.23489	2.09803	1.07587	2010-08-22
1.76127	1.77969	2.66363	1.51566	2.12969	2010-08-23
0.316022	0.309185	0.92131	0.645262	0.434504	2010-08-24
1.40257	1.35936	5.26992	1.73096	1.48128	2010-08-25
0.844153	0.846249	32.8447	0.738177	0.873351	2010-08-26
0.281814	0.256845	106.297	0.240976	0.325825	2010-08-27
0.668615	0.660256	0.658041	0.613748	0.676115	2010-08-28
0.4598	0.462378	0.486464	0.482829	0.488434	2010-08-29
0.125938	0.134244	0.215483	0.200526	0.160907	2010-08-30
0.121084	0.120381	251.796	32.2512	1.33425	2010-08-31
0.110068	0.122131	50.5496	0.239068	0.32365	2010-09-01
0.817101	1.21786	0.836361	0.760275	0.834417	2010-09-02
81.4937	300.385	66.4841	30.8044	73.7001	2010-09-03
0.870168	4.55271	48.4744	0.642109	0.884676	2010-09-04
3.61707	3.60186	123.379	10.3325	5.50556	2010-09-05
0.171076	0.163789	0.42657	0.140897	0.242825	2010-09-06
1.61875	0.362657	1.68336	1.6084	1.7305	2010-09-07
0.23454	0.891168	0.906749	0.388281	0.297834	2010-09-08
0.264529	0.50615	1.56919	1.20596	0.595004	2010-09-09
0.540815	2.79068	136.853	0.78973	0.543468	2010-09-10
0.453188	3.73515	1.41774	7.73561	1.35431	2010-09-11
0.999526	264.906	1.06589	1.01225	1.00748	2010-09-12
0.379104	4.20914	0.475909	0.347379	0.392055	2010-09-13
0.613795	1.4844	0.620492	34.9715	0.642301	2010-09-14
1.07083	316.569	3.65213	1.70647	1.16054	2010-09-15
1.00483	110.826	1.27379	29.6161	1.22345	2010-09-16
0.56599	0.769055	0.690099	0.588429	1.1855	2010-09-17
0.755069	0.832533	86.9405	11.4045	86.932	2010-09-18
1.11695	0.925883	1.64454	9.20853	36.686	2010-09-19
0.679635	0.669401	1.47696	1.48986	0.680991	2010-09-20
0.113118	0.138117	0.162033	0.0821464	0.125058	2010-09-21
1.31945	1.30271	1.21464	1.28521	1.45376	2010-09-22
0.251412	0.419881	0.361266	0.235175	1.00965	2010-09-23
0.340888	0.41022	0.585748	0.472888	0.830191	2010-09-24
1.12029	110.048	0.786735	0.544224	0.547656	2010-09-25
1.08129	1.0945	1.54546	1.58656	0.908802	2010-09-26
61.7525	61.1395	112.32	62.0071	60.9989	2010-09-27
3.47147	1.39149	12.9075	9.03668	3.91824	2010-09-28
4.25744	1.18142	4.94885	5.68741	4.51764	2010-09-29
2.3685	5.96249	2.27776	0.476772	2.39348	2010-09-30
0.523182	3.73754	0.640875	0.460891	0.607478	2010-10-01
0.446513	0.449322	1.41686	1.64407	0.581742	2010-10-02
1.80335	1.89103	1238.82	32.8047	5.15729	2010-10-03
0.621907	0.697627	378.294	0.749805	0.574843	2010-10-04
0.642146	1.13708	0.892563	0.889439	1.08794	2010-10-05
0.587608	113.208	107.475	1.35849	1.25739	2010-10-06
0.556442	0.658864	0.65822	1.00958	0.652665	2010-10-07
0.385552	0.646911	0.423782	2.43946	0.331712	2010-10-08
0.206056	2.1315	0.226722	10.6238	0.268008	2010-10-09
1.30978	1.26432	1.3412	33.343	1.31743	2010-10-10
0.673916	0.668706	1.10915	13.4386	0.702301	2010-10-11
0.785912	0.749199	7.36673	29.1996	78.2494	2010-10-12
0.326326	0.343247	57.4142	0.249951	0.358186	2010-10-13
0.54945	0.721171	1.48804	1.65878	1.71522	2010-10-14
0.545288	0.534772	9.70356	14.1503	2.29078	2010-10-15
1.3867	5.61348	4.13758	3.40913	1.35498	2010-10-16
0.391161	72.1098	0.566993	17.3239	1.45498	2010-10-17
0.416225	1.35617	0.399431	1.05114	0.460453	2010-10-18
1.93813	3.01004	1.90446	2.65471	2.04619	2010-10-19
1.46222	1.94452	2.06314	3.92198	3.14377	2010-10-20
0.484335	3.13584	1.62219	11.5556	2.29536	2010-10-21
0.975926	5.02443	581.522	4.08803	45.722	2010-10-22
0.840769	5.79503	0.977621	0.780346	1.49396	2010-10-23
0.562201	8.75216	0.693076	0.228911	1.84888	2010-10-24
2.64326	233.33	2.50918	2.13145	2.87267	2010-10-25
0.596332	1.9252	0.757794	0.556839	0.912323	2010-10-26
1.85356	7.32891	1.2241	1.97801	2.15312	2010-10-27
1.49831	6.04957	3.38593	3.36336	1.56379	2010-10-28
0.970139	7.41192	21.054	0.604323	1.7712	2010-10-29
0.805948	8.79364	100.373	3.73579	1.2839	2010-10-30
166.252	166.59	134.982	18.3682	166.212	2010-10-31
2.12153	2.09051	1.4422	6.28727	3.82477	2010-11-01
1.08936	3.56229	1.29544	9.11371	4.11478	2010-11-02
1.05345	8.8965	1.16874	1.32977	1.39468	2010-11-03
2.19923	11.6322	0.869794	6.11813	2.54536	2010-11-04
0.844123	0.818382	1.01398	0.799037	1.08334	2010-11-05
0.72809	0.706484	345.792	0.589088	1.11383	2010-11-06
0.887705	6.49334	0.978636	1.10884	1.34359	2010-11-07
0.827735	0.770313	1.04697	0.956355	1.67395	2010-11-08
0.628198	0.794325	0.785281	1.54524	2.18197	2010-11-09
0.837029	0.721113	1.28352	1.88998	0.913703	2010-11-10
1.3112	6.36071	2.11828	10.555	2.36667	2010-11-11
1.14665	1.25542	2.54954	4.80245	2.07057	2010-11-12
4.04452	3.6634	4.69144	6.95778	3.89063	2010-11-13
1.57664	1.58212	1.55098	10.528	4.43966	2010-11-14
0.861931	0.863208	1.0628	16.6673	2.66473	2010-11-15
1.66657	285.218	2.27618	3.36586	5.00017	2010-11-16
1.76991	412.131	1.8317	3.31496	4.65963	2010-11-17
2.90067	511.383	3.12796	3.23906	4.31874	2010-11-18
1.12002	227.508	1.305	39.5331	2.7426	2010-11-19
0.842871	410.817	16.9469	5.20431	7.14449	2010-11-20
1.07795	109.085	22.5	1.49085	2.35365	2010-11-21
0.880094	207.598	91.2127	1.78486	2.46333	2010-11-22
1.57693	256.822	2.55726	1.22956	3.50376	2010-11-23
1.22515	210.788	1.31426	1.10425	1.89939	2010-11-24
1.14486	294.159	1.0888	0.578597	3.01204	2010-11-25
2.03134	342.162	1.86291	1.26106	2.36557	2010-11-26
3.55396	219.195	4.23644	4.14648	21.3196	2010-11-27
6.22291	6.30175	5.06047	13.1224	41.9152	2010-11-28
1.57245	312.985	8.06022	6.40339	9.78499	2010-11-29
1.33201	105.149	52.7475	3.28775	4.28603	2010-11-30
0.967615	2.85193	1.17706	1.99092	1.14536	2010-12-01
1.03804	201.861	1.08791	2.32318	1.06187	2010-12-02
1.00282	1.11332	1.10162	1.36364	0.521108	2010-12-03
1.05972	1.18711	0.930569	6.04416	0.797175	2010-12-04
0.619592	0.464373	1.08982	2.71874	0.836483	2010-12-05
0.609541	0.792328	0.764184	0.617914	0.712249	2010-12-06
1.62188	1.51519	1.75217	1.47298	1.24588	2010-12-07
421.782	414.168	435.305	0.49502	399.444	2010-12-08
5.52464	8.43568	1.68009	2.17689	1.72089	2010-12-09
1.83752	2.07144	77.9923	2.26024	5.20446	2010-12-10
18.3545	16.3489	17.9055	142.619	11.5296	2010-12-11
8.18701	8.05054	13.5014	23.9734	13.7104	2010-12-12
0.628432	57.1837	0.621123	1.01846	0.620367	2010-12-13
1.52237	1.62117	1.1407	0.514222	0.926629	2010-12-14
0.45573	0.464902	6.83919	1.65173	1.96662	2010-12-15
0.293913	0.319304	0.472276	0.208739	0.472749	2010-12-16
0.389898	2.9935	3.46155	0.190743	3.56258	2010-12-17
1.72074	1.65698	4.90614	5.40495	5.59018	2010-12-18
4.60206	4.62197	13.1218	4.87948	5.00213	2010-12-19
211.271	208.654	230.454	207.277	204.24	2010-12-20
3.33523	4.02659	3.7536	2.2533	3.59492	2010-12-21
0.511152	8.83437	1.09123	7.52736	0.793958	2010-12-22
2.03055	1.99087	13.7954	42.0762	15.0299	2010-12-23
4.68123	8.00707	5.42499	11.8331	5.66675	2010-12-24
5.78821	5.92591	6.72485	0.593192	6.72184	2010-12-25
2.57557	2.60684	8.50398	8.89385	10.0949	2010-12-26
6.30432	6.28581	8.59031	18.8012	9.83649	2010-12-27
3.72175	3.65247	0.915836	12.3291	1.19545	2010-12-28
1.83533	4.27965	1.66837	4.19749	1.42811	2010-12-29
2.58913	2.58065	16.4921	15.9766	0.829426	2010-12-30
2.21865	2.11662	2.13887	0.69577	2.54052	2010-12-31
0.982152	1.05057	1.49942	2.20691	2.03829	2011-01-01
0.730461	0.758583	0.60228	0.674424	0.637826	2011-01-02
0.589009	0.628482	0.792637	1.9396	0.726772	2011-01-03
0.791272	1.52365	0.7037	0.441652	0.763286	2011-01-04
0.270661	0.299415	0.270491	0.0744046	0.267537	2011-01-05
2.06156	2.15	2.27028	4.75477	1.99316	2011-01-06
2.51543	2.45967	2.57363	3.02868	2.5395	2011-01-07
1.16916	1.15176	1.25495	3.99665	1.23254	2011-01-08
1.36347	1.38356	5.42806	0.745575	1.88517	2011-01-09
12.9336	21.8392	6.04228	3.24689	6.32755	2011-01-10
4.13909	5.2631	2.73945	2.92331	2.8684	2011-01-11
2.81765	3.33623	6.48028	15.3751	7.80359	2011-01-12
1.6568	1.68057	3.47716	1.9425	4.29685	2011-01-13
0.810535	0.951816	0.74228	0.973813	0.960734	2011-01-14
0.851367	0.877445	1.25773	6.53091	1.44216	2011-01-15
1.47463	3.99803	1.33477	4.99739	2.27831	2011-01-16
4.25642	143.326	2.20193	5.08092	1.86138	2011-01-17
0.854821	93.8227	0.937804	0.738489	0.784139	2011-01-18
0.433395	138.854	0.464814	0.35456	0.434758	2011-01-19
1.32353	13.7953	2.53073	4.84956	1.34252	2011-01-20
0.936411	8.49937	0.977962	1.06587	0.746702	2011-01-21
1.43141	56.1024	8.15103	8.31027	10.7293	2011-01-22
0.630845	29.3409	0.712559	3.62113	3.30424	2011-01-23
3.26182	85.7151	1.37201	3.47607	4.62419	2011-01-24
16.5764	23.5617	210.596	9.17925	118.883	2011-01-25
13.8287	15.2165	26.9293	14.7201	45.1684	2011-01-26
52.4749	10.9165	4.37967	2.01962	4.42228	2011-01-27
1.80808	3.83727	1.28169	0.829526	1.09931	2011-01-28
1.49548	2.04802	1.60483	3.82823	1.09119	2011-01-29
5.9434	5.9675	51.1435	15.1529	50.3988	2011-01-30
112.771	15.0666	37.8627	9.87994	69.0991	2011-01-31
88.0428	179.409	236.072	27.037	47.8215	2011-02-01
54.0231	55.861	33.3517	50.823	42.2255	2011-02-02
61.8124	28.3339	149.235	12.0522	37.5833	2011-02-03
56.8858	38.9472	3.57018	5.98899	8.03213	2011-02-04
56.1328	14.9014	228.645	11.1318	229.238	2011-02-05
5.67632	6.95531	5.89436	12.7741	5.08183	2011-02-06
0.958388	1.01961	0.783324	7.4104	0.875056	2011-02-07
1.29337	1.35141	0.974864	8.15409	1.31438	2011-02-08
0.836386	0.891476	0.852783	5.91698	0.846569	2011-02-09
1.08396	1.09701	0.887131	0.517859	1.08972	2011-02-10
1.23094	1.35062	1.13402	0.891584	1.19433	2011-02-11
0.932054	1.00841	1.28364	0.201695	1.26882	2011-02-12
1.55932	1.61682	2.00045	0.00898438	2.03725	2011-02-13
0.937308	1.30472	0.966028	3.86849	0.977772	2011-02-14
2.04793	2.11545	2.02298	2.10053	2.09552	2011-02-15
0.864417	0.988662	0.828281	0.776114	0.883158	2011-02-16
1.92985	5.26808	1.85261	7.12101	2.02624	2011-02-17
1.57094	2.61909	1.1877	5.66732	1.47301	2011-02-18
5.12003	4.66649	19.9178	2.48995	2.92689	2011-02-19
4.11206	4.16901	4.92373	2.91848	3.57149	2011-02-20
2.96695	3.63052	62.5326	0.594	0.935778	2011-02-21
2.29712	2.6241	1.4623	0.326312	2.28634	2011-02-22
1.11026	1.57876	1.03928	53.5366	1.1512	2011-02-23
0.584466	0.639763	0.576595	3.33205	0.736788	2011-02-24
0.931881	1.01979	0.878517	0.721712	0.934062	2011-02-25
0.899762	3.69727	0.870772	0.207349	1.32649	2011-02-26
0.321719	6.24508	0.360811	0.321273	0.324804	2011-02-27
1.0097	1.10433	0.878335	0.498068	0.93546	2011-02-28
1.68479	2.84965	120.26	0.220696	1.10003	2011-03-01
1.32382	1.87147	39.0053	1.58544	38.7742	2011-03-02
1.48679	5.16031	85.7203	0.492166	85.9168	2011-03-03
1.57569	3.88814	1.25081	1.11493	1.36402	2011-03-04
1.53599	30.0899	360.942	0.168093	1.35141	2011-03-05
6.38086	6.21641	506.076	0.311088	3.33288	2011-03-06
4.91092	7.1265	42.6272	8.09939	13.156	2011-03-07
0.900664	3.6573	0.891124	1.10089	0.894571	2011-03-08
0.632586	2.48329	0.6293	1.32198	0.653886	2011-03-09
0.648698	4.79607	0.620358	0.201706	0.647877	2011-03-10
0.354379	1.98341	0.323633	0.157312	0.348367	2011-03-11
1.32669	3.0818	1.61001	0.220919	1.35566	2011-03-12
0.436263	0.661499	0.474617	0.150058	0.452998	2011-03-13
0.934446	2.82796	0.967517	0.0753582	0.953341	2011-03-14
1.14239	4.67271	1.17441	0.113446	1.19794	2011-03-15
0.956093	1.73242	0.925629	0.172145	0.91674	2011-03-16
1.01903	1.65232	1.0652	0.483609	1.07782	2011-03-17
0.656481	2.77383	53.7091	0.660251	0.641105	2011-03-18
0.989772	1.53463	1.07415	0.632903	1.07344	2011-03-19
2.64656	65.9932	2.66678	5.6059	2.6871	2011-03-20
1.38219	10.4219	1.43391	1.41578	1.42777	2011-03-21
1.03476	6.39637	1048.39	0.519501	0.967981	2011-03-22
0.49088	2.52848	33.4657	0.328461	0.529485	2011-03-23
0.396451	2.347	144.109	4.40285	0.481938	2011-03-24
1.15107	6.23696	1.07408	8.27492	1.26048	2011-03-25
1.45059	6.76053	1.48348	29.0646	1.53778	2011-03-26
0.495117	0.543431	0.493645	30.8997	0.512463	2011-03-27
1.40874	1.44642	1.43183	17.5107	1.55112	2011-03-28
0.836728	5.4486	0.724719	10.9313	1.10946	2011-03-29
0.721408	5.67836	0.844285	0.680176	1.13434	2011-03-30
1.35231	369.236	1.36812	1.86412	1.39432	2011-03-31
0.649289	0.838665	0.600968	0.941134	0.633424	2011-04-01
0.596559	62.8233	0.558611	0.419199	0.831993	2011-04-02
0.574904	0.606494	0.962374	1.35032	1.17537	2011-04-03
0.650658	0.672245	1.40359	1.44187	2.46194	2011-04-04
0.592684	0.465313	0.53834	0.96121	0.436785	2011-04-05
0.408263	1.21224	0.471256	0.658618	1.09141	2011-04-06
0.439895	2.31594	0.451141	0.550348	0.926599	2011-04-07
0.694482	0.69105	0.759773	0.538405	0.749747	2011-04-08
0.430537	0.455821	0.584648	0.38471	0.641911	2011-04-09
1.42761	1.3999	1.66189	1.2556	1.69849	2011-04-10
0.385371	0.452079	0.814204	0.329837	1.38441	2011-04-11
0.118697	0.183501	0.202718	5.32666	0.453787	2011-04-12
1.07582	3.09513	1.0865	1.41412	1.41511	2011-04-13
0.368138	3.50217	0.30517	0.343263	0.479457	2011-04-14
0.661497	0.692132	0.573216	2.4321	0.792054	2011-04-15
0.715885	0.712817	0.634295	0.826744	1.0864	2011-04-16
0.553583	0.543771	0.589094	1.98468	1.35622	2011-04-17
0.209687	0.938132	0.337885	0.300438	0.197928	2011-04-18
1.49786	1.44511	1.36775	2.02289	1.5229	2011-04-19
0.23932	0.250192	0.257979	9.00549	0.274262	2011-04-20
0.109467	0.195176	0.121351	0.0581928	0.123091	2011-04-21
0.386183	0.345813	0.623438	0.403587	0.477251	2011-04-22
0.405916	0.390294	0.463528	0.49694	0.577129	2011-04-23
0.607527	0.572082	0.667498	0.302751	0.688174	2011-04-24
0.224285	0.248021	0.256762	0.281859	0.257086	2011-04-25
0.709504	0.684381	0.75679	6.95014	0.775067	2011-04-26
0.119895	0.14126	0.156937	0.131633	0.144395	2011-04-27
0.928885	1.61384	0.986602	6.4186	1.00718	2011-04-28
0.340699	0.376881	0.354511	1.39775	0.405087	2011-04-29
0.525639	1.00179	0.454834	1.80254	0.711272	2011-04-30
0.318782	0.302199	0.339825	1.73779	0.549166	2011-05-01
1.17788	269.778	1.12984	1.16848	1.20258	2011-05-02
2.05512	1.97586	3.06669	6.95731	3.25826	2011-05-03
1.7921	1.73678	2.61715	6.18321	3.05789	2011-05-04
1.32993	1.7397	1.31289	8.91739	1.52128	2011-05-05
1.65935	1.70548	1.75566	5.52439	1.85375	2011-05-06
0.436592	0.915276	0.38324	0.648709	0.431596	2011-05-07
0.0884596	0.139796	0.124539	0.176992	0.259719	2011-05-08
2.13534	2.42822	2.1726	18.5619	2.6343	2011-05-09
0.985708	1.18398	74.2943	21.4589	9.04211	2011-05-10
2.9688	4.42696	264.609	66.2357	4.4167	2011-05-11
0.797577	0.775631	224.334	9.49499	1.4799	2011-05-12
0.721889	0.990875	0.813541	1.76628	1.10883	2011-05-13
1.52067	2.8311	1.84998	1.60059	1.7323	2011-05-14
1.3585	1.39044	1.33351	1.42815	1.51683	2011-05-15
1.80357	3.92739	1.5153	4.6628	1.59174	2011-05-16
1.95685	1.91371	2.4485	4.83154	1.8854	2011-05-17
0.851577	1.48186	0.977064	51.1232	1.37686	2011-05-18
22.1813	2.12304	4.77116	15.2381	3.23024	2011-05-19
4.05203	13.871	2.61765	6.40972	3.1069	2011-05-20
0.74524	4.16305	0.780473	10.8458	0.812227	2011-05-21
0.180161	0.183829	238.16	3.62624	0.742675	2011-05-22
0.658021	0.653436	0.698237	0.608289	0.828537	2011-05-23
0.759944	3.16684	7.49622	15.6802	1.19589	2011-05-24
3.16498	3.08197	3.21013	7.56865	3.15744	2011-05-25
1.72465	3.09012	2.37233	12.5424	2.57933	2011-05-26
2.49791	2.82153	4.07199	57.2791	4.30068	2011-05-27
2.33558	1.77564	2.61246	23.4151	2.51858	2011-05-28
1.07342	2.36048	0.961989	8.68622	1.13525	2011-05-29
2.88196	2.54963	89.3377	22.0929	90.246	2011-05-30
0.943408	0.746057	18.2302	30.7085	18.4305	2011-05-31
0.583224	287.849	1.33092	19.0862	2.12664	2011-06-01
0.358561	7.60245	0.716014	3.04348	0.814618	2011-06-02
0.354192	5.22488	0.504099	0.179142	0.499338	2011-06-03
0.198871	3.73689	0.527123	2.91151	0.506332	2011-06-04
0.346116	3.48682	0.654293	0.424407	0.427101	2011-06-05
0.685609	1.50679	0.584859	0.747332	1.1811	2011-06-06
0.51505	552.564	0.588839	0.599314	1.17201	2011-06-07
2.54842	270.645	2.79259	8.85354	3.01912	2011-06-08
2.50078	581.097	2.2935	8.34688	3.35597	2011-06-09
0.995325	4.34971	1.18305	8.67434	2.24534	2011-06-10
0.739948	0.699774	0.790605	5.50549	0.850836	2011-06-11
0.514742	0.610648	0.694753	8.05929	1.66018	2011-06-12
1.02352	0.976977	1.01677	4.34388	1.20119	2011-06-13
1.51165	5.72997	1.39162	7.19732	3.00118	2011-06-14
1.93638	1.46075	2.13068	11.2177	2.8693	2011-06-15
2.22181	2.64578	1.65305	10.7679	2.55882	2011-06-16
1.05437	0.976453	4.38785	11.2399	1.71816	2011-06-17
1.27036	1.23854	1.35633	14.9829	1.29803	2011-06-18
0.453576	0.56281	2.22417	19.0838	1.93767	2011-06-19
2.18817	2.16721	3.267	11.5207	3.89621	2011-06-20
1.83436	1.73934	3.56823	12.8058	2.63063	2011-06-21
1.71787	1.90197	1.6531	1.84451	2.77772	2011-06-22
[truncated: 1,777 more rows]
